# Supplementary material for: Novel asymmetric photodimerization reaction of coumarin derivatives bearing a chiral 2-oxazolidinone auxiliary
Source: PubMed Central journal article supplement (PMC9063662; doi:10.1039/c9ra00822e), 2019-04-23
Supplement: RA-009-C9RA00822E-s001.pdf [file RA-009-C9RA00822E-s001.pdf]

## *Supporting Information*

### **Novel asymmetric photodimerization reaction of coumarin derivatives bearing a chiral 2-oxazolidinone auxiliary**

Kennosuke Itoh<sup>\*,a,b</sup>, Fumiya Odate<sup>c</sup>, Takuma Karikomi<sup>d</sup>, Keishi Obe<sup>e</sup>, Tsutomu Miyamori<sup>f</sup>, Hideaki Kamiya<sup>f</sup>, Kenji Yoza<sup>g</sup>, Kenichiro Nagai<sup>b</sup>, Hideaki Fujii<sup>\*,a,b</sup>, Hiroyuki Suga<sup>\*,f</sup>, and Ken Tokunaga<sup>\*,h</sup>

<sup>a</sup> *Laboratory of Medicinal Chemistry, School of Pharmacy, Kitasato University, 5-9-1 Shirokane, Minato-ku, Tokyo 108-8641, Japan. E-mail: itok@pharm.kitasato-u.ac.jp*

<sup>b</sup> *Medicinal Research Laboratories, School of Pharmacy, Kitasato University, 5-9-1 Shirokane, Minato-ku, Tokyo 108-8641, Japan.*

<sup>c</sup> *Applied Chemistry and Chemical Engineering Program, Graduate School, Kogakuin University, 2665-1 Nakano, Hachioji, Tokyo 192-0015, Japan.*

<sup>d</sup> *Department of Applied Chemistry, Faculty of Engineering, Kogakuin University, 2665-1 Nakano, Hachioji, Tokyo 192-0015, Japan.*

<sup>e</sup> *Department of Applied Chemistry, School of Advanced Engineering, Kogakuin University, 2665-1 Nakano, Hachioji, Tokyo 192-0015, Japan.*

<sup>f</sup> *Department of Materials Chemistry, Faculty of Engineering, Shinshu University, 4-17-1 Wakasato, Nagano 380-8553, Japan.*

<sup>g</sup> *Bruker Japan, 3-9, Moriya-cho, Kanagawa-ku, Yokohama 221-0022, Japan.*

<sup>h</sup> *Division of Liberal Arts, Center for Promotion of Higher Education, Kogakuin University, 2665-1 Nakano, Hachioji, Tokyo 192-0015, Japan.*

## *Table of Contents*

|                                                                                                                     |          |
|---------------------------------------------------------------------------------------------------------------------|----------|
| General informations .....                                                                                          | S3       |
| Photochemical reactor .....                                                                                         | S4       |
| DFT and TD-DFT calculations of <b>1C</b> .....                                                                      | S5-S26   |
| DFT calculations of <b>1C</b> •ZnCl <sub>2</sub> complex .....                                                      | S27-S31  |
| Synthesis of chiral coumarin-3-carboxamides .....                                                                   | S32-S33  |
| Typical procedure for photocycloadducts .....                                                                       | S33-S34  |
| Removal of chiral auxiliary and stereoselective reduction .....                                                     | S35      |
| Limitation of chiral coumarin-3-carboxamides .....                                                                  | S35-S36  |
| <sup>1</sup> H NMR and <sup>13</sup> C spectra of coumarin derivatives and photodimers .....                        | S37-S63  |
| <sup>1</sup> H NMR and <sup>13</sup> C spectra of <b>1C</b> and <b>1C</b> •BF <sub>3</sub> •Et <sub>2</sub> O ..... | S64-S65  |
| <sup>1</sup> H NMR spectra of <b>1C</b> and <b>1C</b> •Zn(ClO <sub>4</sub> ) <sub>2</sub> •6H <sub>2</sub> O .....  | S66      |
| Structural characterization of <b>1C</b> by the use of 1D and 2D NMR .....                                          | S67-S83  |
| UV-Vis spectra .....                                                                                                | S84-S86  |
| Crystal structure report .....                                                                                      | S87-S115 |
| References .....                                                                                                    | S116     |

## General informations

Proton NMR spectra were recorded on Bruker Biospin AV600 (600 MHz), AV500 (500 MHz), AV300 (300 MHz) NMR spectrometer and Agilent 400 MR (400 MHz) spectrometer. Chemical shifts are reported in parts per million downfield ( $\delta$ ) relative to internal tetramethylsilane (TMS,  $\delta$  0.00) or with the solvent reference as the internal standard ( $\text{CDCl}_3$ ,  $\delta$  7.26). Data are reported as follows: chemical shift, multiplicity (s = singlet, d = doublet, t = triplet, q = quartet, quint = quintet, sept = septet, br = broad, m = multiplet), coupling constants (Hz), integration, and assignment. Carbon NMR spectra were recorded on Bruker Biospin AV500 (125.7 MHz), AV300 (75.4 MHz), Agilent 400 MR (100 MHz), Agilent 600 (150 MHz) NMR spectrometer with complete proton decoupling. Chemical shifts are reported in parts per million downfield ( $\delta$ ) relative to internal TMS or/with the respective solvent reference as the internal standard ( $\text{CDCl}_3$ ,  $\delta$  77.0). Single crystal X-ray diffraction (SCXRD) experiments were performed on a Bruker APEX II CCD detector with graphite-monochromatized Mo  $K\alpha$  radiation and Rigaku R-AXIS RAPID diffractometer with Cu  $K\alpha$  radiation. Structure solution and refinement were performed by direct methods and the program SHELXL-97 respectively. Mass spectra were taken with Bruker Daltonics micrOTOF II (attached to an APCI-Direct Probe or ESI ion sources) and JEOL JMS-T100LP AccuTOF (attached to an ESI ion source). Specific rotations were recorded with JASCO P-1010 polarimeter. Infrared (IR) spectra were recorded on a JASCO FT/IR-5300 IR spectrophotometer,  $\nu_{\text{max}}$  in  $\text{cm}^{-1}$ . UV-VIS spectra were recorded on a Hitachi double beam spectrophotometer U-2800. Melting points were recorded on Yanako MP-S3 and were not corrected. Flash chromatography was performed using Silica Gel (PSQ-60B) from Fuji Silysia Chemical, LTD. Solvents were purchased from commercial sources and used without purification. Coumarin-3-carboxylic acid was purchased from Sigma-Aldrich Co. LLC. Oxalyl chloride was purchased from Wako Pure Chemical Industries, Ltd. *n*-Butyl lithium in *n*-hexane was purchased from Kanto Chemical Co., Inc. (*S*)-4-Benzyl-1,3-oxazolidine-2-one was purchased from Tokyo Chemical Industry Co., Ltd. (*S*)-5,5-Diphenyl-4-benzyl-1,3-oxazolidine-2-one was prepared by the use of previously reported procedure.<sup>1</sup> 7-Methoxycoumarin-3-carboxylic acid, 5,7-dibromocoumarin-3-carboxylic acid, and 4-methylcoumarin-3-carboxylic acid were prepared by the use of previously reported procedure.<sup>2</sup>

## Photochemical reactor

OMRON ZUV-H20MB controlled by OMRON ZUV-C20H was used as the UV-LED light source (Fig. S1). Irradiation power was measured by USHIO UIT-250 equipped with UV sensor (UVD-S365).<sup>3</sup> DOSHISHA, FST-106U WH was used as a cooling fan.

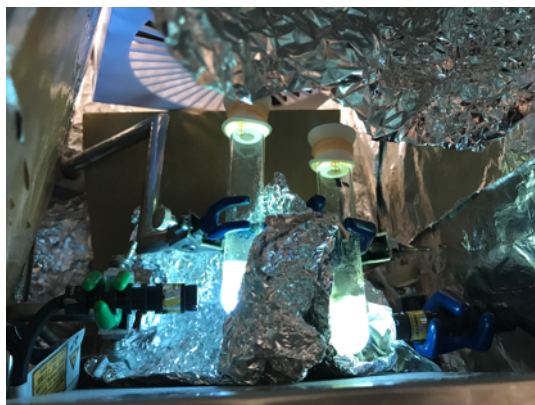

**Fig. S1.** Photochemical reactor



## Computational study

**Table S1.** Electronic energies ( $E$ ) of three conformers of monomer reactants (**1C**) in  $S_0$  and  $T_1$  states were optimized by density functional theory (DFT) or time-dependent density functional theory (TD-DFT) calculations in toluene. B3LYP and 6-311G( $d,p$ ) were used as the functional and basis set.  $\Delta E$  represent relative values of  $E$  to the most stable conformer. Minimum values are shown with underline.

| Compound | Conformation | State | Method | $E$ (a.u.)            | $\Delta E$ (kcal/mol) |
|----------|--------------|-------|--------|-----------------------|-----------------------|
| Monomer  | <b>1CX</b>   | $S_0$ | DFT    | <u>-1202.38302821</u> | <u>0.00</u>           |
|          | <b>1CY</b>   | $S_0$ | DFT    | -1202.38071775        | 1.45                  |
|          | <b>1CZ</b>   | $S_0$ | DFT    | -1202.38217539        | 0.54                  |
|          | <b>1CX</b>   | $T_1$ | TD-DFT | <u>-1202.29853752</u> | <u>0.00</u>           |
|          | <b>1CY</b>   | $T_1$ | TD-DFT | -1202.29624259        | 1.44                  |
|          | <b>1CZ</b>   | $T_1$ | TD-DFT | -1202.29795688        | 0.36                  |

- **1CX** is most stable in the ground state ( $S_0$ ) and the first excited state ( $T_1$ ) as shown in  $\Delta E$  value in Table S1.

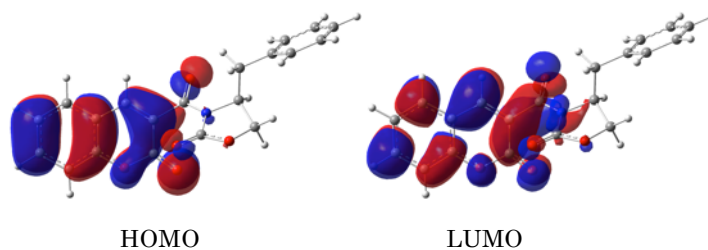

**Fig. S2.** Frontier molecular orbital of **1CX**

- Time-dependent DFT (TD-DFT) calculations showed that the HOMO→LUMO transition for each of the three conformers would be the best described as a triplet excited state [ $^3(\pi,\pi)^*$ ] ( $T_1$ ) for the C-C double bond of the reaction site with zero oscillator strength.

**Table S2.** Electronic energies ( $E$ ) of singlet dimer products (**2C**) in  $S_0$  state were optimized by density functional theory (DFT) calculations in toluene. B3LYP and 6-311G( $d,p$ ) were used as the functional and basis sets. Minimum values are shown with underline.

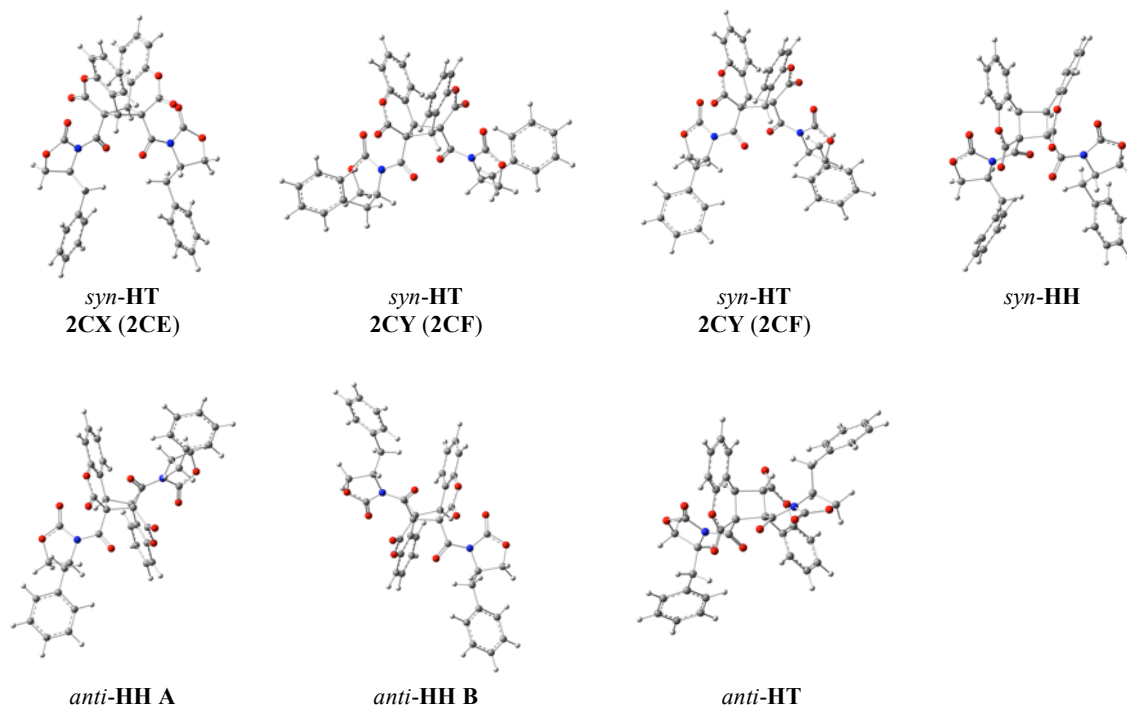

| Compound            | Conformation            | $E$ (a.u.)            | $\Delta E$ (kcal/mol) |
|---------------------|-------------------------|-----------------------|-----------------------|
| Dimer ( <b>2C</b> ) | <i>syn-HT 2CX (2CE)</i> | -2404.74071878        | 0.14                  |
|                     | <i>syn-HT 2CY (2CF)</i> | -2404.73887831        | 1.30                  |
|                     | <i>syn-HT 2CZ (2CF)</i> | <u>-2404.74094220</u> | <u>0.00</u>           |
|                     | <i>syn-HH</i>           | -2404.71435487        | 16.68                 |
|                     | <i>anti-HH A</i>        | -2404.72479750        | 10.13                 |
|                     | <i>anti-HH B</i>        | -2404.72436810        | 10.40                 |
|                     | <i>anti-HT</i>          | -2404.70503512        | 22.53                 |

**Table S3.** Coordinates of the optimized geometry of **1CX** in  $S_0$  state calculated by B3LYP/6-311G(*d,p*).

| No. | Element | Coordinates (Å) |           |           |
|-----|---------|-----------------|-----------|-----------|
|     |         | x               | y         | z         |
| 1   | C       | -3.955605       | -1.023708 | -0.257057 |
| 2   | C       | -4.475634       | 0.160616  | 0.290982  |
| 3   | C       | -2.283675       | 0.924447  | 0.983239  |
| 4   | H       | -4.448630       | -2.857738 | -1.269515 |
| 5   | C       | -4.844855       | -1.942289 | -0.844803 |
| 6   | C       | -5.839815       | 0.437427  | 0.256352  |
| 7   | C       | -6.695612       | -0.484855 | -0.330741 |
| 8   | C       | -6.202451       | -1.676583 | -0.880700 |
| 9   | H       | -6.202491       | 1.361741  | 0.687345  |
| 10  | H       | -7.758709       | -0.277325 | -0.361520 |
| 11  | H       | -6.884000       | -2.385580 | -1.334147 |
| 12  | O       | -3.658831       | 1.075385  | 0.889772  |
| 13  | O       | -1.672030       | 1.749431  | 1.610536  |
| 14  | C       | -1.725737       | -0.267574 | 0.338168  |
| 15  | C       | -2.536466       | -1.211552 | -0.196969 |
| 16  | H       | -2.104399       | -2.118879 | -0.604877 |
| 17  | O       | 0.180586        | -1.596659 | 0.806503  |
| 18  | C       | -0.253791       | -0.527815 | 0.416662  |
| 19  | N       | 0.614010        | 0.488698  | 0.046349  |
| 20  | C       | 0.303418        | 1.638602  | -0.701268 |
| 21  | O       | -0.716946       | 1.888730  | -1.276697 |
| 22  | O       | 1.395155        | 2.431994  | -0.717322 |
| 23  | C       | 2.799135        | -0.489429 | -0.688372 |
| 24  | H       | 2.312059        | -1.466013 | -0.665676 |
| 25  | H       | 2.673601        | -0.080928 | -1.695742 |
| 26  | C       | 4.269323        | -0.636214 | -0.363570 |
| 27  | C       | 4.679256        | -1.443207 | 0.705870  |
| 28  | C       | 5.247762        | 0.032108  | -1.106781 |
| 29  | C       | 6.027912        | -1.572094 | 1.026336  |
| 30  | H       | 3.935643        | -1.982572 | 1.284133  |
| 31  | C       | 6.599756        | -0.096196 | -0.789434 |
| 32  | H       | 4.951385        | 0.648721  | -1.949410 |
| 33  | C       | 6.993315        | -0.896932 | 0.279760  |
| 34  | H       | 6.326354        | -2.204619 | 1.854912  |
| 35  | H       | 7.343442        | 0.426264  | -1.380718 |
| 36  | H       | 8.043813        | -0.999591 | 0.526865  |
| 37  | C       | 2.400111        | 1.910413  | 0.188527  |
| 38  | H       | 3.376730        | 2.099224  | -0.250178 |
| 39  | H       | 2.307056        | 2.437644  | 1.139362  |
| 40  | C       | 2.058917        | 0.420024  | 0.317133  |
| 41  | H       | 2.215021        | 0.056580  | 1.332388  |

**Table S4.** Coordinates of the optimized geometry of **1CY** in  $S_0$  state calculated by B3LYP/6-311G(*d,p*).

| No. | Element | Coordinates (Å) |           |           |
|-----|---------|-----------------|-----------|-----------|
|     |         | x               | y         | z         |
| 1   | C       | -2.639333       | -1.124919 | -0.474999 |
| 2   | C       | -1.443701       | -0.491069 | -0.500346 |
| 3   | H       | -2.685052       | -2.197908 | -0.627183 |
| 4   | C       | -1.364070       | 0.966886  | -0.398363 |
| 5   | O       | -2.550637       | 1.621398  | -0.118709 |
| 6   | O       | -0.382317       | 1.640571  | -0.578930 |
| 7   | C       | -3.753371       | 0.981956  | -0.019621 |
| 8   | C       | -3.852667       | -0.404897 | -0.217290 |
| 9   | C       | -4.874212       | 1.756435  | 0.267031  |
| 10  | H       | -4.756136       | 2.822178  | 0.415072  |
| 11  | C       | -5.120112       | -1.008752 | -0.127809 |
| 12  | H       | -5.203465       | -2.079035 | -0.279444 |
| 13  | C       | -6.113310       | 1.135717  | 0.351549  |
| 14  | H       | -6.991097       | 1.731087  | 0.573321  |
| 15  | C       | -6.240608       | -0.246071 | 0.152463  |
| 16  | H       | -7.214552       | -0.714749 | 0.220457  |
| 17  | C       | -0.198803       | -1.271480 | -0.796844 |
| 18  | O       | -0.113042       | -1.974173 | -1.785951 |
| 19  | C       | 2.113807        | -1.924029 | -0.158213 |
| 20  | C       | 2.680970        | -2.043674 | 1.269704  |
| 21  | H       | 1.863058        | -2.904586 | -0.564040 |
| 22  | H       | 3.717992        | -1.723965 | 1.343660  |
| 23  | H       | 2.571405        | -3.050199 | 1.675608  |
| 24  | N       | 0.857662        | -1.203098 | 0.106155  |
| 25  | O       | 1.890456        | -1.149320 | 2.085692  |
| 26  | C       | 0.781322        | -0.750025 | 1.435383  |
| 27  | O       | -0.105671       | -0.129921 | 1.950181  |
| 28  | C       | 3.035116        | -1.212846 | -1.177332 |
| 29  | H       | 3.809463        | -1.936057 | -1.451289 |
| 30  | H       | 2.446130        | -1.035641 | -2.080569 |
| 31  | C       | 3.695041        | 0.065640  | -0.706020 |
| 32  | C       | 5.052501        | 0.071182  | -0.361637 |
| 33  | C       | 2.976745        | 1.264229  | -0.606940 |
| 34  | C       | 5.677701        | 1.236472  | 0.078723  |
| 35  | H       | 5.630245        | -0.843919 | -0.450540 |
| 36  | C       | 3.600125        | 2.428821  | -0.163354 |
| 37  | H       | 1.926567        | 1.295224  | -0.871364 |
| 38  | C       | 4.950570        | 2.420026  | 0.181499  |
| 39  | H       | 6.730939        | 1.219189  | 0.336336  |
| 40  | H       | 3.025302        | 3.345176  | -0.090176 |
| 41  | H       | 5.432983        | 3.328857  | 0.523308  |

**Table S5.** Coordinates of the optimized geometry of **1CZ** in  $S_0$  state calculated by B3LYP/6-311G(*d,p*).

| No. | Element | Coordinates (Å) |           |           |
|-----|---------|-----------------|-----------|-----------|
|     |         | x               | y         | z         |
| 1   | C       | 4.061997        | -0.781457 | -0.348954 |
| 2   | C       | 4.296651        | 0.083324  | 0.732924  |
| 3   | C       | 1.929099        | 0.406793  | 1.121116  |
| 4   | H       | 4.990228        | -2.008398 | -1.852933 |
| 5   | C       | 5.166498        | -1.340062 | -1.017511 |
| 6   | C       | 5.589922        | 0.396374  | 1.142881  |
| 7   | C       | 6.662860        | -0.166960 | 0.465053  |
| 8   | C       | 6.455406        | -1.037269 | -0.614184 |
| 9   | H       | 5.730478        | 1.068598  | 1.979586  |
| 10  | H       | 7.672463        | 0.071109  | 0.778463  |
| 11  | H       | 7.303178        | -1.469187 | -1.131461 |
| 12  | O       | 3.260588        | 0.635516  | 1.430126  |
| 13  | O       | 1.094141        | 0.858191  | 1.860534  |
| 14  | C       | 1.680363        | -0.417334 | -0.064983 |
| 15  | C       | 2.698041        | -1.024002 | -0.718696 |
| 16  | H       | 2.486339        | -1.687137 | -1.550481 |
| 17  | O       | -0.142343       | -1.858880 | -0.543201 |
| 18  | C       | 0.263670        | -0.716468 | -0.442242 |
| 19  | N       | -0.592765       | 0.353817  | -0.675466 |
| 20  | C       | -0.224592       | 1.684073  | -0.930069 |
| 21  | O       | 0.871554        | 2.166852  | -0.892056 |
| 22  | O       | -1.336089       | 2.373787  | -1.262056 |
| 23  | C       | -2.678341       | -0.059251 | 0.615895  |
| 24  | H       | -2.158842       | -0.895630 | 1.089334  |
| 25  | H       | -2.493617       | 0.825365  | 1.231468  |
| 26  | C       | -4.160327       | -0.352132 | 0.537947  |
| 27  | C       | -4.612090       | -1.603404 | 0.098338  |
| 28  | C       | -5.109681       | 0.613568  | 0.887842  |
| 29  | C       | -5.973729       | -1.877873 | 0.005022  |
| 30  | H       | -3.890249       | -2.371677 | -0.160802 |
| 31  | C       | -6.474518       | 0.341418  | 0.796552  |
| 32  | H       | -4.779166       | 1.582329  | 1.248679  |
| 33  | C       | -6.910223       | -0.904401 | 0.352409  |
| 34  | H       | -6.304484       | -2.853880 | -0.332255 |
| 35  | H       | -7.194937       | 1.101459  | 1.077580  |
| 36  | H       | -7.970617       | -1.118810 | 0.283327  |
| 37  | C       | -2.453373       | 1.475609  | -1.461482 |
| 38  | H       | -3.336149       | 1.934138  | -1.021868 |
| 39  | H       | -2.599126       | 1.355545  | -2.536124 |
| 40  | C       | -2.046924       | 0.160190  | -0.775786 |
| 41  | H       | -2.253209       | -0.698678 | -1.413455 |

**Table S6.** Coordinates of the optimized geometry of **1CX** in T<sub>1</sub> state calculated by B3LYP/6-311G(*d,p*).

| No. | Element | Coordinates (Å) |           |           |
|-----|---------|-----------------|-----------|-----------|
|     |         | x               | y         | z         |
| 1   | C       | -3.954936       | -1.066191 | -0.236292 |
| 2   | C       | -4.470782       | 0.174937  | 0.294837  |
| 3   | C       | -2.273852       | 0.905248  | 0.993010  |
| 4   | H       | -4.569555       | -2.913480 | -1.204869 |
| 5   | C       | -4.925630       | -1.969913 | -0.808522 |
| 6   | C       | -5.803397       | 0.495730  | 0.235057  |
| 7   | C       | -6.714914       | -0.404193 | -0.351038 |
| 8   | C       | -6.256218       | -1.639188 | -0.862039 |
| 9   | H       | -6.134375       | 1.438862  | 0.651575  |
| 10  | H       | -7.765268       | -0.147933 | -0.400646 |
| 11  | H       | -6.965030       | -2.330408 | -1.302863 |
| 12  | O       | -3.633781       | 1.073598  | 0.940829  |
| 13  | O       | -1.632122       | 1.713612  | 1.623828  |
| 14  | C       | -1.709915       | -0.259871 | 0.320763  |
| 15  | C       | -2.603571       | -1.321027 | -0.181216 |
| 16  | H       | -2.172594       | -2.246264 | -0.534865 |
| 17  | O       | 0.142716        | -1.617998 | 0.703682  |
| 18  | C       | -0.257558       | -0.513566 | 0.357684  |
| 19  | N       | 0.624687        | 0.502872  | 0.042094  |
| 20  | C       | 0.319761        | 1.655533  | -0.700603 |
| 21  | O       | -0.704600       | 1.908864  | -1.269843 |
| 22  | O       | 1.413273        | 2.442956  | -0.716172 |
| 23  | C       | 2.806459        | -0.490870 | -0.686049 |
| 24  | H       | 2.317824        | -1.466762 | -0.662906 |
| 25  | H       | 2.682392        | -0.084289 | -1.694323 |
| 26  | C       | 4.276107        | -0.639220 | -0.359025 |
| 27  | C       | 4.683648        | -1.443023 | 0.713636  |
| 28  | C       | 5.256089        | 0.024725  | -1.104099 |
| 29  | C       | 6.031806        | -1.572814 | 1.035811  |
| 30  | H       | 3.939023        | -1.979777 | 1.293048  |
| 31  | C       | 6.607559        | -0.104645 | -0.785060 |
| 32  | H       | 4.961552        | 0.638312  | -1.949560 |
| 33  | C       | 6.998828        | -0.901902 | 0.287557  |
| 34  | H       | 6.328548        | -2.202905 | 1.866809  |
| 35  | H       | 7.352609        | 0.414136  | -1.377808 |
| 36  | H       | 8.048929        | -1.005381 | 0.535896  |
| 37  | C       | 2.417827        | 1.913080  | 0.187222  |
| 38  | H       | 3.394057        | 2.095699  | -0.254542 |
| 39  | H       | 2.330586        | 2.441011  | 1.138025  |
| 40  | C       | 2.068340        | 0.423536  | 0.316722  |
| 41  | H       | 2.220704        | 0.062624  | 1.333633  |

**Table S7.** Coordinates of the optimized geometry of **1CY** in T<sub>1</sub> state calculated by B3LYP/6-311G(*d,p*).

| No. | Element | Coordinates (Å) |           |           |
|-----|---------|-----------------|-----------|-----------|
|     |         | x               | y         | z         |
| 1   | C       | 2.738767        | -1.127789 | 0.678294  |
| 2   | C       | 1.422790        | -0.472629 | 0.514712  |
| 3   | H       | 2.778267        | -2.161883 | 0.988272  |
| 4   | C       | 1.351714        | 0.973972  | 0.356111  |
| 5   | O       | 2.519117        | 1.640088  | 0.090619  |
| 6   | O       | 0.345876        | 1.632993  | 0.485627  |
| 7   | C       | 3.740360        | 0.986714  | -0.009218 |
| 8   | C       | 3.864314        | -0.408472 | 0.346074  |
| 9   | C       | 4.821396        | 1.740936  | -0.389440 |
| 10  | H       | 4.670440        | 2.783224  | -0.641195 |
| 11  | C       | 5.198641        | -0.959961 | 0.317459  |
| 12  | H       | 5.324567        | -2.000456 | 0.592748  |
| 13  | C       | 6.103043        | 1.157713  | -0.429985 |
| 14  | H       | 6.954085        | 1.753289  | -0.734026 |
| 15  | C       | 6.273381        | -0.195467 | -0.062426 |
| 16  | H       | 7.264361        | -0.633669 | -0.084151 |
| 17  | C       | 0.201475        | -1.270862 | 0.734686  |
| 18  | O       | 0.147728        | -2.018078 | 1.701698  |
| 19  | C       | -2.113575       | -1.907401 | 0.087589  |
| 20  | C       | -2.689268       | -1.976548 | -1.343091 |
| 21  | H       | -1.856404       | -2.902765 | 0.453896  |
| 22  | H       | -3.698616       | -1.576811 | -1.411357 |
| 23  | H       | -2.658514       | -2.985260 | -1.755245 |
| 24  | N       | -0.860381       | -1.174079 | -0.153005 |
| 25  | O       | -1.835452       | -1.142038 | -2.161227 |
| 26  | C       | -0.735756       | -0.761736 | -1.490868 |
| 27  | O       | 0.191403        | -0.188609 | -1.992450 |
| 28  | C       | -3.033848       | -1.243536 | 1.138764  |
| 29  | H       | -3.794859       | -1.986204 | 1.396996  |
| 30  | H       | -2.438478       | -1.088848 | 2.042175  |
| 31  | C       | -3.717128       | 0.040172  | 0.717818  |
| 32  | C       | -5.083316       | 0.040920  | 0.409975  |
| 33  | C       | -3.012909       | 1.247725  | 0.629621  |
| 34  | C       | -5.730900       | 1.210998  | 0.017244  |
| 35  | H       | -5.649430       | -0.882259 | 0.489306  |
| 36  | C       | -3.658498       | 2.417348  | 0.233602  |
| 37  | H       | -1.956539       | 1.281185  | 0.866018  |
| 38  | C       | -5.017803       | 2.404007  | -0.074267 |
| 39  | H       | -6.790471       | 1.189900  | -0.212379 |
| 40  | H       | -3.094677       | 3.341139  | 0.168895  |
| 41  | H       | -5.517727       | 3.316498  | -0.378996 |

**Table S8.** Coordinates of the optimized geometry of **1CZ** in T<sub>1</sub> state calculated by B3LYP/6-311G(*d,p*).

| No. | Element | Coordinates (Å) |           |           |
|-----|---------|-----------------|-----------|-----------|
|     |         | x               | y         | z         |
| 1   | C       | 4.050336        | -0.874773 | -0.290201 |
| 2   | C       | 4.277330        | 0.128828  | 0.724888  |
| 3   | C       | 1.908010        | 0.455889  | 1.075954  |
| 4   | H       | 5.088477        | -2.239624 | -1.626462 |
| 5   | C       | 5.228198        | -1.474366 | -0.872125 |
| 6   | C       | 5.539982        | 0.518700  | 1.094510  |
| 7   | C       | 6.662812        | -0.073117 | 0.484260  |
| 8   | C       | 6.486045        | -1.077491 | -0.493766 |
| 9   | H       | 5.650979        | 1.273071  | 1.863369  |
| 10  | H       | 7.657840        | 0.238741  | 0.774240  |
| 11  | H       | 7.355159        | -1.536294 | -0.950590 |
| 12  | O       | 3.215002        | 0.695557  | 1.414774  |
| 13  | O       | 1.047466        | 0.940197  | 1.773103  |
| 14  | C       | 1.657260        | -0.409053 | -0.072921 |
| 15  | C       | 2.762163        | -1.198525 | -0.651393 |
| 16  | H       | 2.537583        | -1.964544 | -1.379417 |
| 17  | O       | -0.086817       | -1.846417 | -0.642773 |
| 18  | C       | 0.275163        | -0.685982 | -0.497322 |
| 19  | N       | -0.603151       | 0.367661  | -0.697369 |
| 20  | C       | -0.231342       | 1.684846  | -0.996719 |
| 21  | O       | 0.875522        | 2.148040  | -1.008994 |
| 22  | O       | -1.342097       | 2.379868  | -1.307260 |
| 23  | C       | -2.666055       | -0.088753 | 0.614043  |
| 24  | H       | -2.142910       | -0.940739 | 1.055308  |
| 25  | H       | -2.466608       | 0.777235  | 1.250961  |
| 26  | C       | -4.150645       | -0.373079 | 0.552805  |
| 27  | C       | -4.616623       | -1.606951 | 0.080205  |
| 28  | C       | -5.088264       | 0.584728  | 0.952449  |
| 29  | C       | -5.981151       | -1.871932 | 0.003110  |
| 30  | H       | -3.904157       | -2.370022 | -0.217506 |
| 31  | C       | -6.455871       | 0.321879  | 0.877572  |
| 32  | H       | -4.746308       | 1.539273  | 1.339500  |
| 33  | C       | -6.905985       | -0.906368 | 0.400162  |
| 34  | H       | -6.323092       | -2.834551 | -0.360348 |
| 35  | H       | -7.167073       | 1.075241  | 1.197283  |
| 36  | H       | -7.968530       | -1.113573 | 0.343717  |
| 37  | C       | -2.482981       | 1.496347  | -1.434030 |
| 38  | H       | -3.327225       | 1.965930  | -0.934367 |
| 39  | H       | -2.701717       | 1.385953  | -2.496686 |
| 40  | C       | -2.056061       | 0.167579  | -0.780329 |
| 41  | H       | -2.266872       | -0.678120 | -1.435134 |



**Table S9.** Coordinates of the optimized geometry of **2CX** in  $S_0$  state calculated by B3LYP/6-311G(*d,p*).

| No. | Element | Coordinates (Å) |           |           |
|-----|---------|-----------------|-----------|-----------|
|     |         | x               | y         | z         |
| 1   | O       | 0.605631        | 2.058731  | -3.778577 |
| 2   | O       | -0.597843       | 3.259697  | -2.374308 |
| 3   | O       | 2.474298        | 2.614465  | -1.527471 |
| 4   | O       | -0.911184       | 1.385172  | 0.619887  |
| 5   | O       | 2.744298        | 3.902460  | 0.294811  |
| 6   | O       | -2.744298       | -3.902460 | 0.294811  |
| 7   | O       | -2.474298       | -2.614465 | -1.527471 |
| 8   | O       | -0.605631       | -2.058731 | -3.778577 |
| 9   | O       | 0.911184        | -1.385172 | 0.619887  |
| 10  | O       | 0.597843        | -3.259697 | -2.374308 |
| 11  | N       | 1.008381        | 2.502518  | 0.286963  |
| 12  | C       | 2.614469        | 2.915218  | 4.784774  |
| 13  | H       | 3.580596        | 2.858512  | 4.293373  |
| 14  | C       | 2.112144        | 2.970728  | -0.439357 |
| 15  | N       | -1.008381       | -2.502518 | 0.286963  |
| 16  | C       | 1.467314        | 2.500569  | 4.100384  |
| 17  | C       | 0.012105        | 2.242537  | -2.580486 |
| 18  | C       | -0.044932       | -1.103060 | -1.580930 |
| 19  | C       | -2.737931       | 0.943565  | -3.472533 |
| 20  | H       | -2.982428       | 1.728428  | -2.766190 |
| 21  | C       | -0.012105       | 1.666175  | -0.146896 |
| 22  | C       | -3.364122       | 0.908742  | -4.713013 |
| 23  | H       | -4.098366       | 1.663293  | -4.967846 |
| 24  | C       | -3.044754       | -0.099442 | -5.622258 |
| 25  | H       | -3.527106       | -0.135836 | -6.591833 |
| 26  | C       | -1.780188       | -0.013223 | -3.116249 |
| 27  | C       | -1.104308       | 0.027395  | -1.774951 |
| 28  | H       | -1.842997       | 0.098467  | -0.979973 |
| 29  | C       | -0.012105       | -2.242537 | -2.580486 |
| 30  | C       | 2.535041        | 3.384200  | 6.095773  |
| 31  | H       | 3.436224        | 3.696883  | 6.611215  |
| 32  | C       | 1.016554        | 3.045435  | 1.658703  |
| 33  | H       | 0.007427        | 3.354190  | 1.926463  |
| 34  | C       | 3.364122        | -0.908742 | -4.713013 |
| 35  | H       | 4.098366        | -1.663293 | -4.967846 |
| 36  | C       | -1.016554       | -3.045435 | 1.658703  |
| 37  | H       | -0.007427       | -3.354190 | 1.926463  |
| 38  | C       | 2.737931        | -0.943565 | -3.472533 |
| 39  | H       | 2.982428        | -1.728428 | -2.766190 |
| 40  | C       | 0.012105        | -1.666175 | -0.146896 |
| 41  | C       | 1.780188        | 0.013223  | -3.116249 |
| 42  | C       | 0.044932        | 1.103060  | -1.580930 |

|    |   |           |           |           |
|----|---|-----------|-----------|-----------|
| 43 | C | 1.496286  | 1.020143  | -4.035622 |
| 44 | C | -2.112144 | -2.970728 | -0.439357 |
| 45 | C | 1.943390  | 4.250593  | 1.454021  |
| 46 | H | 1.393410  | 5.163169  | 1.219835  |
| 47 | H | 2.619334  | 4.426912  | 2.286910  |
| 48 | C | 1.104308  | -0.027395 | -1.774951 |
| 49 | H | 1.842997  | -0.098467 | -0.979973 |
| 50 | C | -1.467314 | -2.500569 | 4.100384  |
| 51 | C | 1.542814  | 2.006932  | 2.672289  |
| 52 | H | 0.949784  | 1.097600  | 2.556932  |
| 53 | H | 2.575397  | 1.753310  | 2.414579  |
| 54 | C | 3.044754  | 0.099442  | -5.622258 |
| 55 | H | 3.527106  | 0.135836  | -6.591833 |
| 56 | C | -1.496286 | -1.020143 | -4.035622 |
| 57 | C | -2.111548 | -1.070766 | -5.281979 |
| 58 | H | -1.853837 | -1.876998 | -5.956980 |
| 59 | C | -0.152330 | -3.029950 | 6.072373  |
| 60 | H | 0.809354  | -3.064853 | 6.571813  |
| 61 | C | 0.235104  | 2.561472  | 4.764023  |
| 62 | H | -0.663964 | 2.228949  | 4.254878  |
| 63 | C | 2.111548  | 1.070766  | -5.281979 |
| 64 | H | 1.853837  | 1.876998  | -5.956980 |
| 65 | C | -1.943390 | -4.250593 | 1.454021  |
| 66 | H | -1.393410 | -5.163169 | 1.219835  |
| 67 | H | -2.619334 | -4.426912 | 2.286910  |
| 68 | C | -1.303108 | -3.444974 | 6.742158  |
| 69 | H | -1.239474 | -3.806876 | 7.761994  |
| 70 | C | -1.542814 | -2.006932 | 2.672289  |
| 71 | H | -2.575397 | -1.753310 | 2.414579  |
| 72 | H | -0.949784 | -1.097600 | 2.556932  |
| 73 | C | -0.235104 | -2.561472 | 4.764023  |
| 74 | H | 0.663964  | -2.228949 | 4.254878  |
| 75 | C | 1.303108  | 3.444974  | 6.742158  |
| 76 | H | 1.239474  | 3.806876  | 7.761994  |
| 77 | C | -2.535041 | -3.384200 | 6.095773  |
| 78 | H | -3.436224 | -3.696883 | 6.611215  |
| 79 | C | 0.152330  | 3.029950  | 6.072373  |
| 80 | H | -0.809354 | 3.064853  | 6.571813  |
| 81 | C | -2.614469 | -2.915218 | 4.784774  |
| 82 | H | -3.580596 | -2.858512 | 4.293373  |

---

**Table S10.** Coordinates of the optimized geometry of **2CY** in  $S_0$  state calculated by B3LYP/6-311G(*d,p*).

| No. | Element | Coordinates (Å) |           |           |
|-----|---------|-----------------|-----------|-----------|
|     |         | x               | y         | z         |
| 1   | C       | 0.227176        | 0.714723  | 1.081006  |
| 2   | C       | 1.082470        | 0.514948  | -0.209542 |
| 3   | C       | -0.227176       | 0.714724  | -1.081007 |
| 4   | H       | 0.321685        | -0.077236 | 1.820291  |
| 5   | H       | -0.321685       | -0.077234 | -1.820293 |
| 6   | C       | -2.188711       | 1.506989  | 0.506745  |
| 7   | O       | -3.023726       | 1.303582  | 1.351090  |
| 8   | C       | -1.354372       | 2.966140  | -1.221060 |
| 9   | O       | -2.160377       | 2.701389  | -0.117213 |
| 10  | C       | -0.427577       | 2.057181  | -1.725950 |
| 11  | C       | 0.283310        | 2.421911  | -2.875597 |
| 12  | H       | 0.999790        | 1.723691  | -3.292452 |
| 13  | C       | 0.093412        | 3.660540  | -3.476997 |
| 14  | H       | 0.658878        | 3.921991  | -4.363149 |
| 15  | C       | -0.826749       | 4.559156  | -2.937498 |
| 16  | H       | -0.982802       | 5.526961  | -3.399060 |
| 17  | C       | -1.557406       | 4.210362  | -1.808601 |
| 18  | H       | -2.292187       | 4.876716  | -1.374876 |
| 19  | C       | -1.082470       | 0.514949  | 0.209541  |
| 20  | C       | -1.609209       | -0.922770 | 0.400405  |
| 21  | O       | -1.164006       | -1.660260 | 1.257189  |
| 22  | N       | -2.586137       | -1.400771 | -0.461773 |
| 23  | C       | -3.189739       | -0.724211 | -1.532019 |
| 24  | O       | -3.897679       | -1.604752 | -2.254551 |
| 25  | O       | -3.106836       | 0.445531  | -1.790857 |
| 26  | C       | -3.666653       | -2.955008 | -1.784160 |
| 27  | H       | -4.626625       | -3.465274 | -1.776350 |
| 28  | H       | -2.988474       | -3.441345 | -2.486600 |
| 29  | C       | -4.003204       | -3.079951 | 0.796591  |
| 30  | H       | -4.147857       | -4.164512 | 0.824756  |
| 31  | H       | -3.474643       | -2.811369 | 1.713476  |
| 32  | C       | -5.351011       | -2.393860 | 0.736301  |
| 33  | C       | -6.485770       | -3.094399 | 0.308683  |
| 34  | C       | -5.497619       | -1.051743 | 1.109918  |
| 35  | C       | -7.730155       | -2.470970 | 0.238593  |
| 36  | H       | -6.398698       | -4.143245 | 0.041585  |
| 37  | C       | -6.740391       | -0.426122 | 1.036709  |
| 38  | H       | -4.642280       | -0.487477 | 1.462939  |
| 39  | C       | -7.859686       | -1.131615 | 0.598903  |
| 40  | H       | -8.596732       | -3.032680 | -0.092083 |
| 41  | H       | -6.830443       | 0.614829  | 1.325650  |
| 42  | H       | -8.826128       | -0.643331 | 0.545214  |

|    |   |           |           |           |
|----|---|-----------|-----------|-----------|
| 43 | C | -3.044770 | -2.800674 | -0.385048 |
| 44 | H | -2.169105 | -3.439861 | -0.271735 |
| 45 | C | 2.188712  | 1.506989  | -0.506745 |
| 46 | O | 2.160379  | 2.701388  | 0.117214  |
| 47 | O | 3.023726  | 1.303582  | -1.351090 |
| 48 | C | 1.354374  | 2.966138  | 1.221062  |
| 49 | C | 0.427578  | 2.057178  | 1.725951  |
| 50 | C | 1.557409  | 4.210359  | 1.808605  |
| 51 | H | 2.292190  | 4.876713  | 1.374880  |
| 52 | C | -0.283308 | 2.421908  | 2.875598  |
| 53 | H | -0.999789 | 1.723688  | 3.292452  |
| 54 | C | 0.826753  | 4.559152  | 2.937503  |
| 55 | H | 0.982806  | 5.526956  | 3.399066  |
| 56 | C | -0.093409 | 3.660536  | 3.477000  |
| 57 | H | -0.658875 | 3.921986  | 4.363152  |
| 58 | C | 1.609209  | -0.922771 | -0.400408 |
| 59 | O | 1.164007  | -1.660259 | -1.257193 |
| 60 | C | 3.044769  | -2.800676 | 0.385044  |
| 61 | C | 3.666649  | -2.955012 | 1.784157  |
| 62 | H | 2.169103  | -3.439862 | 0.271729  |
| 63 | H | 4.626620  | -3.465279 | 1.776348  |
| 64 | H | 2.988469  | -3.441349 | 2.486596  |
| 65 | N | 2.586136  | -1.400773 | 0.461770  |
| 66 | O | 3.897676  | -1.604756 | 2.254549  |
| 67 | C | 3.189737  | -0.724214 | 1.532018  |
| 68 | O | 3.106836  | 0.445528  | 1.790857  |
| 69 | C | 4.003204  | -3.079952 | -0.796594 |
| 70 | H | 4.147857  | -4.164513 | -0.824760 |
| 71 | H | 3.474644  | -2.811369 | -1.713479 |
| 72 | C | 5.351011  | -2.393861 | -0.736302 |
| 73 | C | 6.485769  | -3.094399 | -0.308681 |
| 74 | C | 5.497619  | -1.051744 | -1.109919 |
| 75 | C | 7.730153  | -2.470970 | -0.238588 |
| 76 | H | 6.398696  | -4.143244 | -0.041582 |
| 77 | C | 6.740391  | -0.426123 | -1.036708 |
| 78 | H | 4.642281  | -0.487479 | -1.462942 |
| 79 | C | 7.859685  | -1.131615 | -0.598898 |
| 80 | H | 8.596730  | -3.032679 | 0.092091  |
| 81 | H | 6.830443  | 0.614829  | -1.325649 |
| 82 | H | 8.826126  | -0.643331 | -0.545208 |

---

**Table S11.** Coordinates of the optimized geometry of **2CZ** in  $S_0$  state calculated by B3LYP/6-311G(*d,p*).

| No. | Element | Coordinates (Å) |           |           |
|-----|---------|-----------------|-----------|-----------|
|     |         | x               | y         | z         |
| 1   | C       | -0.106418       | -1.545332 | 1.095718  |
| 2   | C       | -1.071183       | -1.356540 | -0.116416 |
| 3   | C       | 0.161912        | -1.540824 | -1.095111 |
| 4   | H       | -0.153073       | -0.759880 | 1.846353  |
| 5   | H       | 0.182311        | -0.754308 | -1.845830 |
| 6   | C       | 2.275827        | -2.281014 | 0.312706  |
| 7   | O       | 3.188994        | -2.043710 | 1.060164  |
| 8   | C       | 1.313403        | -3.774185 | -1.317444 |
| 9   | O       | 2.214357        | -3.483366 | -0.297191 |
| 10  | C       | 0.327306        | -2.886869 | -1.742840 |
| 11  | C       | -0.482072       | -3.277349 | -2.816391 |
| 12  | H       | -1.247339       | -2.596320 | -3.170473 |
| 13  | C       | -0.327640       | -4.519572 | -3.420490 |
| 14  | H       | -0.969442       | -4.801066 | -4.246462 |
| 15  | C       | 0.655026        | -5.396099 | -2.960720 |
| 16  | H       | 0.784039        | -6.366727 | -3.424733 |
| 17  | C       | 1.481990        | -5.021785 | -1.909125 |
| 18  | H       | 2.265397        | -5.671033 | -1.539184 |
| 19  | C       | 1.119668        | -1.319444 | 0.117016  |
| 20  | C       | 1.636261        | 0.124624  | 0.270407  |
| 21  | O       | 1.257602        | 0.852751  | 1.165759  |
| 22  | N       | 2.543796        | 0.613828  | -0.659468 |
| 23  | C       | 3.095656        | -0.051769 | -1.762447 |
| 24  | O       | 3.839381        | 0.822817  | -2.461993 |
| 25  | O       | 2.956641        | -1.205683 | -2.064313 |
| 26  | C       | 3.638266        | 2.167350  | -1.955063 |
| 27  | H       | 4.592133        | 2.686967  | -1.997328 |
| 28  | H       | 2.914216        | 2.664891  | -2.602108 |
| 29  | C       | 4.197826        | 2.023861  | 0.565700  |
| 30  | H       | 3.760592        | 1.640963  | 1.489882  |
| 31  | H       | 5.011978        | 1.348304  | 0.287954  |
| 32  | C       | 4.726277        | 3.424509  | 0.784208  |
| 33  | C       | 3.952050        | 4.373809  | 1.464018  |
| 34  | C       | 5.984675        | 3.807630  | 0.308973  |
| 35  | C       | 4.420220        | 5.670720  | 1.656248  |
| 36  | H       | 2.980529        | 4.089371  | 1.855975  |
| 37  | C       | 6.457120        | 5.105724  | 0.501060  |
| 38  | H       | 6.607466        | 3.081095  | -0.203141 |
| 39  | C       | 5.674907        | 6.041544  | 1.172966  |
| 40  | H       | 3.809358        | 6.390461  | 2.189626  |
| 41  | H       | 7.437746        | 5.381880  | 0.130028  |
| 42  | H       | 6.041603        | 7.050144  | 1.325773  |

|    |   |           |           |           |
|----|---|-----------|-----------|-----------|
| 43 | C | 3.109728  | 1.969631  | -0.528214 |
| 44 | H | 2.309119  | 2.670170  | -0.296197 |
| 45 | C | -2.194118 | -2.356785 | -0.311938 |
| 46 | O | -2.092144 | -3.556236 | 0.298236  |
| 47 | O | -3.114731 | -2.150614 | -1.059520 |
| 48 | C | -1.181801 | -3.816319 | 1.318469  |
| 49 | C | -0.226242 | -2.896105 | 1.743649  |
| 50 | C | -1.307980 | -5.068867 | 1.910243  |
| 51 | H | -2.068918 | -5.744355 | 1.540400  |
| 52 | C | 0.596001  | -3.258840 | 2.817147  |
| 53 | H | 1.337763  | -2.552232 | 3.171110  |
| 54 | C | -0.468684 | -5.414865 | 2.961777  |
| 55 | H | -0.564668 | -6.389273 | 3.425875  |
| 56 | C | 0.483792  | -4.505526 | 3.421350  |
| 57 | H | 1.134843  | -4.765043 | 4.247278  |
| 58 | C | -1.636556 | 0.069213  | -0.269821 |
| 59 | O | -1.281857 | 0.810205  | -1.164407 |
| 60 | C | -3.175589 | 1.861371  | 0.525939  |
| 61 | C | -3.714592 | 2.040331  | 1.951398  |
| 62 | H | -2.399946 | 2.590106  | 0.295962  |
| 63 | H | -4.687008 | 2.524551  | 1.990960  |
| 64 | H | -3.010948 | 2.564574  | 2.599872  |
| 65 | N | -2.561860 | 0.526675  | 0.658816  |
| 66 | O | -3.867339 | 0.689711  | 2.459029  |
| 67 | C | -3.091078 | -0.157655 | 1.761439  |
| 68 | O | -2.910589 | -1.305518 | 2.064406  |
| 69 | C | -4.261815 | 1.877488  | -0.571042 |
| 70 | H | -3.807666 | 1.514285  | -1.495034 |
| 71 | H | -5.050950 | 1.170999  | -0.298153 |
| 72 | C | -4.841876 | 3.258008  | -0.786487 |
| 73 | C | -4.099199 | 4.240214  | -1.454635 |
| 74 | C | -6.117785 | 3.589764  | -0.319428 |
| 75 | C | -4.615253 | 5.519296  | -1.643651 |
| 76 | H | -3.114292 | 3.995451  | -1.839907 |
| 77 | C | -6.638208 | 4.869837  | -0.508427 |
| 78 | H | -6.716023 | 2.836911  | 0.183920  |
| 79 | C | -5.887156 | 5.838833  | -1.168781 |
| 80 | H | -4.028190 | 6.265059  | -2.167937 |
| 81 | H | -7.631635 | 5.106098  | -0.143977 |
| 82 | H | -6.291071 | 6.833498  | -1.319071 |

---

**Table S12.** Coordinates of the optimized geometry of *syn*-HH in S<sub>0</sub> state calculated by B3LYP/6-311G(*d,p*).

| No. | Element | Coordinates (Å) |           |           |
|-----|---------|-----------------|-----------|-----------|
|     |         | x               | y         | z         |
| 1   | C       | -6.121497       | -2.638139 | 0.149339  |
| 2   | C       | -5.090180       | -2.635631 | 1.079304  |
| 3   | C       | -3.854154       | -2.099187 | 0.730500  |
| 4   | C       | -3.622327       | -1.548760 | -0.528497 |
| 5   | C       | -4.671911       | -1.577315 | -1.454235 |
| 6   | C       | -5.911640       | -2.112158 | -1.125675 |
| 7   | H       | -7.084100       | -3.057224 | 0.417619  |
| 8   | H       | -5.214562       | -3.049328 | 2.071932  |
| 9   | C       | -2.280454       | -0.981404 | -0.891957 |
| 10  | H       | -4.507764       | -1.168798 | -2.444757 |
| 11  | H       | -6.709017       | -2.119552 | -1.858987 |
| 12  | C       | -1.256649       | -1.018745 | 0.292801  |
| 13  | C       | -1.579619       | -1.853219 | 1.524536  |
| 14  | O       | -2.886126       | -2.166881 | 1.726262  |
| 15  | O       | -0.769227       | -2.159698 | 2.350909  |
| 16  | C       | 0.120969        | -1.320642 | -0.320105 |
| 17  | C       | 2.013475        | -2.923544 | -0.646193 |
| 18  | C       | 2.016294        | -4.451514 | -0.458170 |
| 19  | C       | -0.166788       | -3.780350 | -0.270399 |
| 20  | N       | 0.620368        | -2.620469 | -0.255772 |
| 21  | O       | -1.363031       | -3.844547 | -0.175842 |
| 22  | O       | 0.624709        | -4.844621 | -0.470019 |
| 23  | C       | 3.061204        | -2.203064 | 0.217912  |
| 24  | C       | 4.472499        | -2.622238 | -0.139314 |
| 25  | C       | 5.067087        | -2.178145 | -1.327488 |
| 26  | C       | 5.209015        | -3.464426 | 0.700044  |
| 27  | C       | 6.357596        | -2.572496 | -1.670495 |
| 28  | H       | 4.519958        | -1.507632 | -1.982718 |
| 29  | C       | 6.502370        | -3.859659 | 0.360289  |
| 30  | H       | 4.772596        | -3.803291 | 1.633961  |
| 31  | C       | 7.079164        | -3.417162 | -0.827526 |
| 32  | H       | 6.803411        | -2.214396 | -2.591718 |
| 33  | H       | 7.059104        | -4.508633 | 1.026923  |
| 34  | H       | 8.085500        | -3.721340 | -1.091811 |
| 35  | H       | 2.851877        | -2.417807 | 1.268902  |
| 36  | H       | 2.945225        | -1.128294 | 0.075744  |
| 37  | H       | 2.153294        | -2.657907 | -1.697633 |
| 38  | H       | 2.522739        | -4.985906 | -1.257810 |
| 39  | H       | 2.437851        | -4.741906 | 0.505278  |
| 40  | O       | 0.750924        | -0.470466 | -0.917007 |
| 41  | C       | -5.801455       | 2.748710  | -1.350931 |
| 42  | C       | -5.376326       | 2.290432  | -0.106616 |

|    |   |           |           |           |
|----|---|-----------|-----------|-----------|
| 43 | C | -4.163440 | 1.624184  | -0.017817 |
| 44 | C | -3.361753 | 1.394714  | -1.128982 |
| 45 | C | -3.794169 | 1.876936  | -2.364290 |
| 46 | C | -5.008703 | 2.549828  | -2.480341 |
| 47 | H | -6.746528 | 3.272430  | -1.433034 |
| 48 | H | -5.958683 | 2.451238  | 0.791611  |
| 49 | C | -2.117950 | 0.593910  | -0.951765 |
| 50 | H | -3.173170 | 1.719596  | -3.240196 |
| 51 | H | -5.333302 | 2.919029  | -3.445939 |
| 52 | C | -1.482468 | 0.559908  | 0.476305  |
| 53 | C | -2.505451 | 0.876404  | 1.594960  |
| 54 | O | -3.775606 | 1.211372  | 1.252317  |
| 55 | O | -2.221717 | 0.797007  | 2.756209  |
| 56 | C | -0.171723 | 1.282046  | 0.872080  |
| 57 | C | 1.438642  | 3.162121  | 0.531174  |
| 58 | C | 1.163078  | 4.581505  | 0.011034  |
| 59 | C | -0.874135 | 3.587858  | 0.338463  |
| 60 | N | 0.089169  | 2.571877  | 0.380909  |
| 61 | O | -2.060753 | 3.464716  | 0.469104  |
| 62 | O | -0.260678 | 4.772837  | 0.171574  |
| 63 | C | 2.530358  | 2.420416  | -0.252649 |
| 64 | C | 3.884469  | 3.082418  | -0.098598 |
| 65 | C | 4.594565  | 2.972351  | 1.104047  |
| 66 | C | 4.451675  | 3.820972  | -1.142117 |
| 67 | C | 5.832112  | 3.590742  | 1.260544  |
| 68 | H | 4.179730  | 2.388382  | 1.919472  |
| 69 | C | 5.691844  | 4.440063  | -0.989074 |
| 70 | H | 3.924939  | 3.903459  | -2.087499 |
| 71 | C | 6.384265  | 4.328865  | 0.214028  |
| 72 | H | 6.368904  | 3.490790  | 2.197232  |
| 73 | H | 6.116899  | 5.004859  | -1.811284 |
| 74 | H | 7.349319  | 4.807678  | 0.334449  |
| 75 | H | 2.242949  | 2.381901  | -1.306695 |
| 76 | H | 2.572561  | 1.393366  | 0.110040  |
| 77 | H | 1.696610  | 3.179984  | 1.593725  |
| 78 | H | 1.672960  | 5.357998  | 0.575435  |
| 79 | H | 1.400013  | 4.679900  | -1.050441 |
| 80 | O | 0.639222  | 0.732048  | 1.575631  |
| 81 | H | -1.918890 | -1.469149 | -1.797733 |
| 82 | H | -1.366266 | 0.847065  | -1.697869 |

---



**Table S13.** Coordinates of the optimized geometry of *anti*-HH A in S<sub>0</sub> state calculated by B3LYP/6-311G(*d,p*).

| No. | Element | Coordinates (Å) |           |           |
|-----|---------|-----------------|-----------|-----------|
|     |         | x               | y         | z         |
| 1   | C       | -2.142161       | -3.197946 | 3.922756  |
| 2   | C       | -1.646215       | -1.901474 | 3.887409  |
| 3   | C       | -0.837965       | -1.502535 | 2.824969  |
| 4   | C       | -0.516798       | -2.371171 | 1.784592  |
| 5   | C       | -1.029191       | -3.672680 | 1.840877  |
| 6   | C       | -1.832299       | -4.090641 | 2.895596  |
| 7   | H       | -2.767033       | -3.511242 | 4.750761  |
| 8   | H       | -1.863477       | -1.185588 | 4.670089  |
| 9   | C       | 0.360853        | -1.931380 | 0.643041  |
| 10  | H       | -0.786239       | -4.369364 | 1.045331  |
| 11  | H       | -2.211100       | -5.105406 | 2.919113  |
| 12  | C       | 0.543534        | -0.381199 | 0.587636  |
| 13  | C       | 0.276471        | 0.411984  | 1.882961  |
| 14  | O       | -0.368031       | -0.203901 | 2.899298  |
| 15  | O       | 0.705688        | 1.520821  | 2.045678  |
| 16  | C       | 1.920248        | 0.115499  | 0.102081  |
| 17  | C       | 4.382069        | 0.298183  | 0.394173  |
| 18  | C       | 5.296824        | -0.662266 | 1.162227  |
| 19  | C       | 3.185177        | -0.950451 | 2.008210  |
| 20  | N       | 3.067401        | -0.235035 | 0.808362  |
| 21  | O       | 2.299734        | -1.364140 | 2.704984  |
| 22  | O       | 4.492546        | -1.110095 | 2.283732  |
| 23  | C       | 4.546775        | 1.781171  | 0.791644  |
| 24  | C       | 5.840002        | 2.370759  | 0.273142  |
| 25  | C       | 5.975367        | 2.689380  | -1.084461 |
| 26  | C       | 6.925982        | 2.601374  | 1.123799  |
| 27  | C       | 7.165853        | 3.216157  | -1.577683 |
| 28  | H       | 5.136223        | 2.535586  | -1.755523 |
| 29  | C       | 8.119529        | 3.130271  | 0.632816  |
| 30  | H       | 6.833021        | 2.380543  | 2.182455  |
| 31  | C       | 8.243498        | 3.436353  | -0.719993 |
| 32  | H       | 7.250057        | 3.462587  | -2.630225 |
| 33  | H       | 8.948241        | 3.307728  | 1.309145  |
| 34  | H       | 9.169197        | 3.850568  | -1.103024 |
| 35  | H       | 4.500637        | 1.863690  | 1.881356  |
| 36  | H       | 3.696048        | 2.332870  | 0.388230  |
| 37  | H       | 4.491008        | 0.184496  | -0.683031 |
| 38  | H       | 5.570622        | -1.538977 | 0.572650  |
| 39  | H       | 6.190681        | -0.187854 | 1.559053  |
| 40  | O       | 2.035222        | 0.814832  | -0.880273 |
| 41  | C       | -1.923641       | 0.113292  | -0.084828 |
| 42  | C       | -4.384425       | 0.315081  | -0.376709 |

|    |   |           |           |           |
|----|---|-----------|-----------|-----------|
| 43 | C | -5.296360 | -0.598012 | -1.203779 |
| 44 | C | -3.180846 | -0.839512 | -2.054709 |
| 45 | N | -3.068160 | -0.194830 | -0.814864 |
| 46 | O | -2.292472 | -1.213515 | -2.770019 |
| 47 | O | -4.486916 | -0.981839 | -2.345064 |
| 48 | C | -4.545082 | 1.819090  | -0.687982 |
| 49 | C | -5.844147 | 2.378277  | -0.150722 |
| 50 | C | -5.994414 | 2.620177  | 1.221038  |
| 51 | C | -6.920949 | 2.656586  | -0.998857 |
| 52 | C | -7.190367 | 3.118824  | 1.730073  |
| 53 | H | -5.162569 | 2.428803  | 1.891516  |
| 54 | C | -8.119910 | 3.157465  | -0.492003 |
| 55 | H | -6.816370 | 2.495674  | -2.067196 |
| 56 | C | -8.258630 | 3.387295  | 0.874422  |
| 57 | H | -7.286087 | 3.305843  | 2.793803  |
| 58 | H | -8.941216 | 3.372894  | -1.166331 |
| 59 | H | -9.188521 | 3.779759  | 1.269992  |
| 60 | H | -4.486583 | 1.965796  | -1.770300 |
| 61 | H | -3.699085 | 2.345799  | -0.243299 |
| 62 | H | -4.499103 | 0.138969  | 0.691481  |
| 63 | H | -5.574401 | -1.506728 | -0.667032 |
| 64 | H | -6.187484 | -0.100053 | -1.577192 |
| 65 | H | 1.288551  | -2.502016 | 0.643908  |
| 66 | O | -2.042522 | 0.750172  | 0.938621  |
| 67 | C | -0.544628 | -0.349088 | -0.597479 |
| 68 | C | -0.279883 | 0.518062  | -1.844907 |
| 69 | C | -0.355921 | -1.892758 | -0.742022 |
| 70 | C | 0.523969  | -2.262715 | -1.906274 |
| 71 | H | -1.281294 | -2.465915 | -0.777039 |
| 72 | C | 0.843565  | -1.334328 | -2.894141 |
| 73 | C | 1.040631  | -3.557156 | -2.036764 |
| 74 | C | 1.654631  | -1.668664 | -3.976555 |
| 75 | C | 1.846642  | -3.910924 | -3.112526 |
| 76 | H | 0.798532  | -4.299145 | -1.283014 |
| 77 | C | 2.154988  | -2.959323 | -4.085872 |
| 78 | H | 1.870622  | -0.908106 | -4.716257 |
| 79 | H | 2.228839  | -4.921417 | -3.194029 |
| 80 | H | 2.782149  | -3.222248 | -4.929522 |
| 81 | O | 0.369303  | -0.035181 | -2.893923 |
| 82 | O | -0.714454 | 1.632242  | -1.944477 |

---

**Table S14.** Coordinates of the optimized geometry of *anti*-HH B in S<sub>0</sub> state calculated by B3LYP/6-311G(*d,p*).

| No. | Element | Coordinates (Å) |           |           |
|-----|---------|-----------------|-----------|-----------|
|     |         | x               | y         | z         |
| 1   | C       | 1.875136        | -0.442255 | -0.708148 |
| 2   | C       | 4.236126        | -1.175586 | -0.927145 |
| 3   | C       | 4.747309        | -2.622321 | -0.942512 |
| 4   | C       | 2.727974        | -2.660715 | 0.144176  |
| 5   | N       | 2.856208        | -1.395688 | -0.448003 |
| 6   | O       | 1.774723        | -3.103474 | 0.723559  |
| 7   | O       | 3.882063        | -3.330379 | -0.018691 |
| 8   | C       | 5.018634        | -0.231545 | 0.009715  |
| 9   | C       | 6.397602        | 0.094028  | -0.521498 |
| 10  | C       | 6.548093        | 0.983197  | -1.593633 |
| 11  | C       | 7.544062        | -0.487397 | 0.029280  |
| 12  | C       | 7.809626        | 1.276791  | -2.103806 |
| 13  | H       | 5.670759        | 1.455407  | -2.024201 |
| 14  | C       | 8.809367        | -0.194240 | -0.478942 |
| 15  | H       | 7.449016        | -1.165661 | 0.871309  |
| 16  | C       | 8.945068        | 0.686991  | -1.548542 |
| 17  | H       | 7.907177        | 1.970398  | -2.931407 |
| 18  | H       | 9.686891        | -0.651530 | -0.035704 |
| 19  | H       | 9.927706        | 0.917661  | -1.943941 |
| 20  | H       | 5.092811        | -0.692959 | 0.999126  |
| 21  | H       | 4.438049        | 0.686843  | 0.119186  |
| 22  | H       | 4.198066        | -0.754739 | -1.930348 |
| 23  | H       | 4.643663        | -3.089107 | -1.922853 |
| 24  | H       | 5.770130        | -2.725539 | -0.588721 |
| 25  | O       | 2.189495        | 0.557495  | -1.316211 |
| 26  | C       | 0.426198        | -0.682892 | -0.235373 |
| 27  | C       | -0.075087       | -1.885131 | -1.059648 |
| 28  | C       | 0.235835        | -0.743464 | 1.314111  |
| 29  | C       | -0.818789       | -1.731392 | 1.734690  |
| 30  | C       | -1.313626       | -2.681641 | 0.845359  |
| 31  | C       | -1.326429       | -1.731968 | 3.038913  |
| 32  | C       | -2.286068       | -3.603462 | 1.226332  |
| 33  | C       | -2.293287       | -2.647054 | 3.439395  |
| 34  | H       | -0.949503       | -1.004719 | 3.750769  |
| 35  | C       | -2.775120       | -3.586030 | 2.526230  |
| 36  | H       | -2.634916       | -4.321743 | 0.495102  |
| 37  | H       | -2.666554       | -2.630940 | 4.456352  |
| 38  | H       | -3.528966       | -4.304515 | 2.825571  |
| 39  | O       | 0.305307        | -2.083291 | -2.181012 |
| 40  | O       | -0.867039       | -2.801132 | -0.459112 |
| 41  | H       | 1.153501        | -0.918241 | 1.874053  |
| 42  | C       | -0.426198       | 0.682894  | -0.235374 |

|    |   |           |           |           |
|----|---|-----------|-----------|-----------|
| 43 | C | 0.075086  | 1.885132  | -1.059651 |
| 44 | C | -0.235835 | 0.743468  | 1.314110  |
| 45 | C | 0.818788  | 1.731397  | 1.734687  |
| 46 | C | 1.313625  | 2.681645  | 0.845355  |
| 47 | C | 1.326429  | 1.731975  | 3.038910  |
| 48 | C | 2.286067  | 3.603467  | 1.226327  |
| 49 | C | 2.293287  | 2.647063  | 3.439391  |
| 50 | H | 0.949503  | 1.004727  | 3.750768  |
| 51 | C | 2.775119  | 3.586038  | 2.526224  |
| 52 | H | 2.634914  | 4.321748  | 0.495096  |
| 53 | H | 2.666554  | 2.630949  | 4.456348  |
| 54 | H | 3.528965  | 4.304523  | 2.825564  |
| 55 | O | -0.305307 | 2.083290  | -2.181015 |
| 56 | O | 0.867038  | 2.801134  | -0.459115 |
| 57 | H | -1.153502 | 0.918247  | 1.874052  |
| 58 | C | -1.875135 | 0.442257  | -0.708149 |
| 59 | O | -2.189494 | -0.557493 | -1.316212 |
| 60 | N | -2.856209 | 1.395689  | -0.448004 |
| 61 | C | -4.236127 | 1.175585  | -0.927147 |
| 62 | C | -2.727976 | 2.660716  | 0.144174  |
| 63 | C | -4.747312 | 2.622319  | -0.942513 |
| 64 | O | -1.774725 | 3.103476  | 0.723555  |
| 65 | O | -3.882066 | 3.330378  | -0.018692 |
| 66 | H | -5.770132 | 2.725535  | -0.588720 |
| 67 | H | -4.643668 | 3.089106  | -1.922853 |
| 68 | C | -5.018633 | 0.231542  | 0.009712  |
| 69 | H | -4.438047 | -0.686846 | 0.119182  |
| 70 | H | -5.092811 | 0.692954  | 0.999123  |
| 71 | H | -4.198066 | 0.754739  | -1.930350 |
| 72 | C | -6.397601 | -0.094034 | -0.521501 |
| 73 | C | -7.544062 | 0.487386  | 0.029279  |
| 74 | C | -6.548089 | -0.983199 | -1.593640 |
| 75 | C | -8.809366 | 0.194227  | -0.478943 |
| 76 | H | -7.449017 | 1.165646  | 0.871311  |
| 77 | C | -7.809621 | -1.276794 | -2.103814 |
| 78 | H | -5.670754 | -1.455404 | -2.024210 |
| 79 | C | -8.945065 | -0.687001 | -1.548546 |
| 80 | H | -9.686891 | 0.651512  | -0.035702 |
| 81 | H | -7.907170 | -1.970399 | -2.931417 |
| 82 | H | -9.927703 | -0.917672 | -1.943946 |

---

**Table S15.** Coordinates of the optimized geometry of *anti*-HT in S<sub>0</sub> state calculated by B3LYP/6-311G(*d,p*).

| No. | Element | Coordinates (Å) |           |           |
|-----|---------|-----------------|-----------|-----------|
|     |         | x               | y         | z         |
| 1   | C       | -0.673137       | 0.860048  | -0.285718 |
| 2   | C       | -1.067349       | 1.871139  | -1.372503 |
| 3   | C       | 0.071285        | 1.409237  | 0.974380  |
| 4   | C       | 0.721963        | 2.744041  | 0.731849  |
| 5   | C       | 0.441691        | 3.484267  | -0.414205 |
| 6   | C       | 1.627202        | 3.277797  | 1.656411  |
| 7   | C       | 1.053414        | 4.712989  | -0.652916 |
| 8   | C       | 2.240120        | 4.505631  | 1.437084  |
| 9   | H       | 1.840684        | 2.719462  | 2.562328  |
| 10  | C       | 1.952785        | 5.222370  | 0.273948  |
| 11  | H       | 0.806156        | 5.246785  | -1.561672 |
| 12  | H       | 2.933451        | 4.903434  | 2.168288  |
| 13  | O       | -1.932169       | 1.635075  | -2.171821 |
| 14  | O       | -0.469132       | 3.082852  | -1.375918 |
| 15  | H       | -0.515842       | 1.433563  | 1.891206  |
| 16  | C       | -1.964668       | 0.077767  | 0.048840  |
| 17  | O       | -2.106495       | -1.099350 | -0.193298 |
| 18  | N       | -3.017500       | 0.751727  | 0.673799  |
| 19  | C       | -4.294382       | 0.049048  | 0.918641  |
| 20  | C       | -3.126027       | 2.102619  | 1.030448  |
| 21  | C       | -4.922782       | 1.005973  | 1.937841  |
| 22  | C       | -5.111461       | -0.114096 | -0.381503 |
| 23  | H       | -4.088869       | -0.926199 | 1.356326  |
| 24  | O       | -2.336297       | 2.981864  | 0.820387  |
| 25  | O       | -4.295044       | 2.285550  | 1.670744  |
| 26  | H       | -4.694431       | 0.727362  | 2.968049  |
| 27  | H       | -5.996256       | 1.126965  | 1.816405  |
| 28  | H       | -4.472685       | -0.601363 | -1.120101 |
| 29  | H       | -5.359552       | 0.877358  | -0.771007 |
| 30  | C       | -6.369752       | -0.926689 | -0.168758 |
| 31  | C       | -7.628768       | -0.318854 | -0.130834 |
| 32  | C       | -6.292990       | -2.314818 | 0.005248  |
| 33  | C       | -8.781936       | -1.074307 | 0.080734  |
| 34  | H       | -7.710321       | 0.752651  | -0.283124 |
| 35  | C       | -7.442015       | -3.071402 | 0.218157  |
| 36  | H       | -5.326108       | -2.806199 | -0.039221 |
| 37  | C       | -8.691294       | -2.452444 | 0.258521  |
| 38  | H       | -9.749488       | -0.585388 | 0.100930  |
| 39  | H       | -7.363713       | -4.145360 | 0.345469  |
| 40  | H       | -9.586648       | -3.041754 | 0.420448  |
| 41  | C       | 0.117836        | -3.434771 | -2.377649 |
| 42  | C       | 0.229144        | -2.070576 | -2.136435 |

|    |   |           |           |           |
|----|---|-----------|-----------|-----------|
| 43 | C | 0.431139  | -1.580062 | -0.841921 |
| 44 | C | 0.513346  | -2.504816 | 0.198096  |
| 45 | C | 0.414311  | -3.872513 | -0.025393 |
| 46 | C | 0.216587  | -4.338595 | -1.320059 |
| 47 | H | -0.048542 | -3.790220 | -3.387167 |
| 48 | H | 0.138311  | -1.368941 | -2.957156 |
| 49 | C | 0.607054  | -0.103425 | -0.550999 |
| 50 | H | 0.480539  | -4.545388 | 0.820282  |
| 51 | H | 0.134416  | -5.403878 | -1.499574 |
| 52 | C | 0.815177  | -0.851475 | 1.945307  |
| 53 | C | 1.061951  | 0.215350  | 0.900804  |
| 54 | O | 0.652897  | -2.135757 | 1.536978  |
| 55 | O | 0.810291  | -0.610562 | 3.122467  |
| 56 | H | 2.100822  | 0.513956  | 1.023554  |
| 57 | C | 1.520745  | 0.456600  | -1.674719 |
| 58 | O | 1.040962  | 1.106978  | -2.571579 |
| 59 | N | 2.867549  | 0.069071  | -1.699460 |
| 60 | C | 3.642560  | -0.784520 | -0.767039 |
| 61 | C | 3.642652  | 0.237277  | -2.889809 |
| 62 | C | 4.414528  | -1.621712 | -1.787151 |
| 63 | C | 4.588890  | 0.064905  | 0.120491  |
| 64 | H | 2.987924  | -1.412676 | -0.169826 |
| 65 | O | 3.509714  | 1.037940  | -3.760490 |
| 66 | O | 4.625858  | -0.698960 | -2.877332 |
| 67 | H | 3.829618  | -2.469271 | -2.150175 |
| 68 | H | 5.385345  | -1.958475 | -1.434122 |
| 69 | H | 4.004553  | 0.813193  | 0.660368  |
| 70 | H | 5.259301  | 0.624772  | -0.537210 |
| 71 | C | 5.401465  | -0.761635 | 1.095472  |
| 72 | C | 6.730307  | -1.097883 | 0.812009  |
| 73 | C | 4.845155  | -1.209229 | 2.300324  |
| 74 | C | 7.478795  | -1.870613 | 1.698401  |
| 75 | H | 7.189506  | -0.739792 | -0.103853 |
| 76 | C | 5.589810  | -1.982191 | 3.187862  |
| 77 | H | 3.828586  | -0.938342 | 2.565505  |
| 78 | C | 6.908741  | -2.318610 | 2.887597  |
| 79 | H | 8.508034  | -2.115462 | 1.461696  |
| 80 | H | 5.140965  | -2.314185 | 4.117060  |
| 81 | H | 7.489673  | -2.917254 | 3.579712  |
| 82 | H | 2.427011  | 6.179071  | 0.089963  |

---

Fig. S3 shows energy diagram of coordination of  $\text{ZnCl}_2$  to coumarin (**1CX**) calculated by B3LYP/6-311G(*d,p*). Coordination of  $\text{ZnCl}_2$  to coumarin is an exothermic reaction. Energies and geometries of three coumarin- $\text{ZnCl}_2$  complexes (**A**, **B**, and **C**) are shown in Table 16 and Fig. S4, respectively. It is found that **complex B** is most stable among three complexes so that  $\text{ZnCl}_2$  is not coordinating the carbonyl group of the oxazolidinone between N and O. Tables S17-S19 show geometries of complexes listed in Table S16.

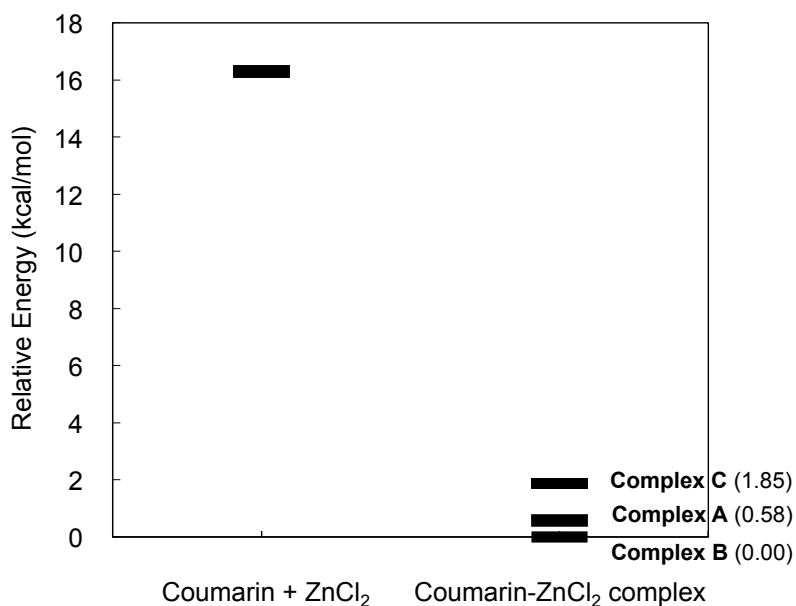

**Fig. S3.** Energy diagram of coordination of  $\text{ZnCl}_2$  to coumarin (**1CX**) in  $S_0$  state calculated by B3LYP/6-311G(*d,p*). Values in parentheses are energies relative to **complex B**.

**Table S16.** Electronic energies ( $E$ ) of three coumarin- $\text{ZnCl}_2$  complexes in  $S_0$  state optimized by B3LYP/6-311G(*d,p*) in toluene. Minimum values are shown with underline.

| Complex          | State | $E$ (a.u.)            | $DE$ (kcal/mol) |
|------------------|-------|-----------------------|-----------------|
| <b>Complex A</b> | $S_0$ | -3902.28193077        | 0.58            |
| <b>Complex B</b> | $S_0$ | <u>-3902.28285810</u> | <u>0.00</u>     |
| <b>Complex C</b> | $S_0$ | -3902.27991121        | 1.85            |

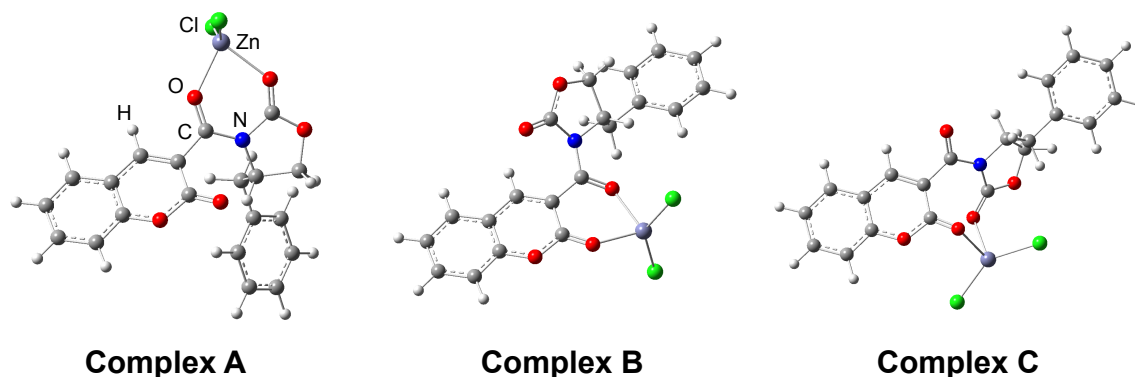

**Fig. S4.** Optimized structures of three coumarin-ZnCl<sub>2</sub> complexes in S<sub>0</sub> state calculated by B3LYP/6-311G(*d,p*).

**Table S17.** Coordinates of the optimized geometry of **Complex A** in S<sub>0</sub> state calculated by B3LYP/6-311G(*d,p*).

| No. | Element | Coordinates (Å) |           |           |
|-----|---------|-----------------|-----------|-----------|
|     |         | x               | y         | z         |
| 1   | C       | -1.273656       | -1.466438 | -1.503377 |
| 2   | C       | -2.269616       | -3.426109 | -0.480980 |
| 3   | C       | -1.397895       | -3.368556 | 0.620982  |
| 4   | C       | -0.441312       | -2.313602 | 0.645397  |
| 5   | C       | -0.395427       | -1.365668 | -0.335824 |
| 6   | H       | -3.882967       | -4.439545 | -1.459003 |
| 7   | C       | -3.231986       | -4.424578 | -0.594620 |
| 8   | C       | -1.509342       | -4.351281 | 1.626173  |
| 9   | H       | 0.268837        | -2.259699 | 1.463203  |
| 10  | C       | -2.461974       | -5.346114 | 1.520225  |
| 11  | C       | -3.320641       | -5.378413 | 0.409856  |
| 12  | H       | -0.836850       | -4.314281 | 2.475122  |
| 13  | H       | -2.547079       | -6.102817 | 2.289693  |
| 14  | H       | -4.064626       | -6.162052 | 0.330449  |
| 15  | O       | -2.190138       | -2.503859 | -1.481781 |
| 16  | O       | -1.269021       | -0.754512 | -2.476402 |
| 17  | C       | 0.708785        | -0.368537 | -0.271673 |
| 18  | O       | 1.801812        | -0.730987 | 0.156436  |
| 19  | C       | -0.823404       | 1.645964  | -0.743469 |
| 20  | C       | -0.405098       | 2.877675  | -1.554363 |
| 21  | H       | -1.534930       | 1.057546  | -1.311952 |
| 22  | H       | -0.874068       | 3.798529  | -1.218853 |
| 23  | H       | -0.555473       | 2.742015  | -2.625010 |
| 24  | N       | 0.481833        | 0.936678  | -0.676642 |
| 25  | O       | 1.025791        | 3.000696  | -1.325218 |
| 26  | C       | 1.524789        | 1.846604  | -0.907577 |
| 27  | O       | 2.713918        | 1.657167  | -0.774407 |



|    |    |           |           |           |
|----|----|-----------|-----------|-----------|
| 28 | Zn | 3.757328  | 0.149758  | 0.337984  |
| 29 | Cl | 3.753237  | 1.036707  | 2.377750  |
| 30 | Cl | 4.947878  | -1.000487 | -1.138405 |
| 31 | C  | -1.357070 | 1.963966  | 0.668479  |
| 32 | H  | -1.437845 | 1.024400  | 1.223476  |
| 33 | H  | -0.630563 | 2.584923  | 1.199777  |
| 34 | C  | -2.705226 | 2.651672  | 0.628700  |
| 35 | C  | -2.837745 | 3.996611  | 0.987259  |
| 36 | C  | -3.847990 | 1.950212  | 0.223956  |
| 37 | C  | -4.080409 | 4.627843  | 0.940695  |
| 38 | H  | -1.966113 | 4.552163  | 1.317740  |
| 39 | C  | -5.089099 | 2.578351  | 0.174378  |
| 40 | H  | -3.769132 | 0.901941  | -0.047479 |
| 41 | C  | -5.208344 | 3.921061  | 0.532029  |
| 42 | H  | -4.165229 | 5.669812  | 1.227341  |
| 43 | H  | -5.963626 | 2.019602  | -0.139013 |
| 44 | H  | -6.174872 | 4.410230  | 0.496120  |

**Table S18.** Coordinates of the optimized geometry of **Complex B** in  $S_0$  state calculated by B3LYP/6-311G(*d,p*).

| No. | Element | Coordinates (Å) |           |           |
|-----|---------|-----------------|-----------|-----------|
|     |         | x               | y         | z         |
| 1   | C       | 2.481164        | 0.776734  | 0.170619  |
| 2   | C       | 4.441140        | -0.524937 | -0.306197 |
| 3   | C       | 3.681618        | -1.680598 | -0.552719 |
| 4   | C       | 2.273949        | -1.592491 | -0.373127 |
| 5   | C       | 1.672733        | -0.424955 | 0.005515  |
| 6   | H       | 6.375238        | 0.391577  | -0.224096 |
| 7   | C       | 5.826012        | -0.519373 | -0.422220 |
| 8   | C       | 4.351911        | -2.861907 | -0.933124 |
| 9   | H       | 1.679505        | -2.476894 | -0.555519 |
| 10  | C       | 5.727525        | -2.867419 | -1.052246 |
| 11  | C       | 6.459697        | -1.696590 | -0.795488 |
| 12  | H       | 3.772828        | -3.758592 | -1.119768 |
| 13  | H       | 6.245119        | -3.773338 | -1.340923 |
| 14  | H       | 7.538785        | -1.708532 | -0.890172 |
| 15  | O       | 3.828309        | 0.643717  | 0.046914  |
| 16  | O       | 2.081684        | 1.903772  | 0.423971  |
| 17  | C       | 0.206782        | -0.294177 | 0.165065  |
| 18  | O       | -0.379820       | 0.758673  | -0.091324 |
| 19  | C       | -2.035026       | -1.250144 | 0.537000  |
| 20  | C       | -2.454304       | -2.487061 | 1.351007  |
| 21  | H       | -2.302563       | -0.329509 | 1.057350  |
| 22  | H       | -2.852170       | -3.282505 | 0.720390  |
| 23  | H       | -3.163630       | -2.258613 | 2.142524  |
| 24  | N       | -0.556593       | -1.381377 | 0.558281  |

|    |    |           |           |           |
|----|----|-----------|-----------|-----------|
| 25 | O  | -1.245208 | -2.982993 | 1.968828  |
| 26 | C  | -0.151462 | -2.388240 | 1.482477  |
| 27 | O  | 0.963694  | -2.679248 | 1.805577  |
| 28 | Zn | 0.202906  | 2.802204  | 0.164138  |
| 29 | Cl | -0.634864 | 3.173800  | 2.198910  |
| 30 | Cl | 0.211888  | 3.742172  | -1.848286 |
| 31 | C  | -2.613046 | -1.228133 | -0.888709 |
| 32 | H  | -2.171833 | -0.389384 | -1.429521 |
| 33 | H  | -2.317952 | -2.147862 | -1.402275 |
| 34 | C  | -4.122483 | -1.093719 | -0.882086 |
| 35 | C  | -4.947274 | -2.183825 | -1.176870 |
| 36 | C  | -4.720150 | 0.133905  | -0.569642 |
| 37 | C  | -6.335665 | -2.055199 | -1.154952 |
| 38 | H  | -4.502460 | -3.138349 | -1.439607 |
| 39 | C  | -6.105855 | 0.264433  | -0.545588 |
| 40 | H  | -4.097210 | 0.996152  | -0.355079 |
| 41 | C  | -6.918233 | -0.831120 | -0.836740 |
| 42 | H  | -6.959430 | -2.909859 | -1.391482 |
| 43 | H  | -6.550956 | 1.223460  | -0.306382 |
| 44 | H  | -7.997186 | -0.728241 | -0.821734 |

**Table S19.** Coordinates of the optimized geometry of **Complex C** in  $S_0$  state calculated by B3LYP/6-311G(*d,p*).

| No. | Element | Coordinates (Å) |           |          |
|-----|---------|-----------------|-----------|----------|
|     |         | x               | y         | z        |
| 1   | C       | -1.902551       | -0.230709 | -0.74666 |
| 2   | C       | -4.118862       | -1.120508 | -0.52022 |
| 3   | C       | -3.643087       | -2.295879 | 0.084263 |
| 4   | C       | -2.234949       | -2.414090 | 0.268628 |
| 5   | C       | -1.384953       | -1.407094 | -0.08304 |
| 6   | H       | -5.797708       | 0.023354  | -1.19833 |
| 7   | C       | -5.474633       | -0.900095 | -0.73629 |
| 8   | C       | -4.577073       | -3.277829 | 0.473264 |
| 9   | H       | -1.832966       | -3.320497 | 0.707425 |
| 10  | C       | -5.926138       | -3.071087 | 0.261046 |
| 11  | C       | -6.370938       | -1.882347 | -0.34098 |
| 12  | H       | -4.220082       | -4.188681 | 0.939313 |
| 13  | H       | -6.644865       | -3.823510 | 0.560333 |
| 14  | H       | -7.431058       | -1.726015 | -0.49964 |
| 15  | O       | -3.244673       | -0.151704 | -0.92693 |
| 16  | O       | -1.229087       | 0.693409  | -1.19047 |
| 17  | C       | 0.087302        | -1.653018 | 0.067549 |
| 18  | O       | 0.564941        | -2.707882 | -0.29797 |
| 19  | C       | 2.375215        | -0.950335 | 0.767225 |
| 20  | C       | 2.730671        | -0.058811 | 1.966361 |
| 21  | H       | 2.547750        | -2.002013 | 0.987751 |

|    |    |           |           |          |
|----|----|-----------|-----------|----------|
| 22 | H  | 3.630776  | 0.531313  | 1.816404 |
| 23 | H  | 2.798494  | -0.613650 | 2.902311 |
| 24 | N  | 0.915569  | -0.711459 | 0.686514 |
| 25 | O  | 1.614659  | 0.865032  | 2.088411 |
| 26 | C  | 0.570823  | 0.433840  | 1.393524 |
| 27 | O  | -0.504914 | 1.002663  | 1.404435 |
| 28 | Zn | -0.931013 | 2.525897  | -0.17621 |
| 29 | Cl | -2.912476 | 3.322603  | 0.379161 |
| 30 | Cl | 1.143559  | 3.061622  | -0.77553 |
| 31 | C  | 3.071181  | -0.562450 | -0.5536  |
| 32 | H  | 2.609298  | -1.143918 | -1.35528 |
| 33 | H  | 2.873744  | 0.492564  | -0.7615  |
| 34 | C  | 4.560364  | -0.828419 | -0.51607 |
| 35 | C  | 5.475984  | 0.223431  | -0.40852 |
| 36 | C  | 5.050858  | -2.138970 | -0.58254 |
| 37 | C  | 6.847350  | -0.026171 | -0.36235 |
| 38 | H  | 5.114188  | 1.245880  | -0.37721 |
| 39 | C  | 6.419325  | -2.390816 | -0.53575 |
| 40 | H  | 4.356240  | -2.966892 | -0.68622 |
| 41 | C  | 7.322358  | -1.333819 | -0.42335 |
| 42 | H  | 7.542249  | 0.802449  | -0.28525 |
| 43 | H  | 6.781852  | -3.410996 | -0.59491 |
| 44 | H  | 8.388203  | -1.528990 | -0.39116 |

---

### Synthesis of chiral coumarin-3-carboxamides.

To a suspension of coumarin-3-carboxylic acid (5.00 g, 26.3 mmol, 1.00 equiv.) in anhydrous CH<sub>2</sub>Cl<sub>2</sub> (130 mL) at 0 °C under an argon atmosphere, oxalyl chloride (2.67 mL, 31.6 mmol, 1.20 equiv.) and anhydrous DMF (2 drops) were added. The resulting suspension was warmed to room temperature and stirred for 24 h. The reaction solvent and volatile compounds were evaporated and dried under high vacuum for an hour to give coumarin-3-carboxylic acid chloride which was used for the preparation of **1C** without purification. In a dried round bottom flask under argon atmosphere, (*S*)-4-benzyl-1,3-oxazolidine-2-one (4.66 g, 26.3 mmol, 1.00 equiv.) was dissolved in anhydrous THF (130 mL) and cooled to -78 °C, and then *n*-butyllithium (1.57 M in *n*-hexane solution) (17.6 mL, 27.6 mmol, 1.05 equiv.) was added dropwise and stirred for 30 min. The resulting suspension was warmed to 0 °C and stirred for 30 min. A solid coumarin-3-carboxylic acid chloride was added to the reaction mixture in one portion under an argon stream. The resulting suspension was warmed to 0 °C and stirred for 30 min. The reaction mixture was allowed to warm to room temperature and stirred for 24 h. The resulting suspension was poured into saturated aqueous NH<sub>4</sub>Cl and extracted with AcOEt. The combined organic layer was washed with brine, dried over anhydrous Na<sub>2</sub>SO<sub>4</sub>, filtered and evaporated. The resulting pale yellow powder was recrystallized from AcOEt to give colorless precipitate which was collected by filtration and washed with AcOEt to give analytically pure **1C** (6.89 g) in 75% yield.

In a synthesis of **1A**, the reaction mixture was poured into saturated aqueous NH<sub>4</sub>Cl to give colorless precipitate, which was washed with water and AcOEt. The resulting colorless powder was suspended in AcOEt and refluxed for 1 hr. The resulting a hot suspension was filtered and washed with pre-warmed AcOEt to give analytically pure **1A**.

**1A**: Colorless powder; mp 274-275 °C; [ $\alpha$ ]<sub>D</sub><sup>23</sup> +173.7 (c 0.13, DMSO); IR (KBr)  $\nu$  3043, 2983, 1789, 1728, 1698, 1608, 1335, 1124, 757, 700 cm<sup>-1</sup>; <sup>1</sup>H NMR (400 MHz, DMSO-*d*<sub>6</sub>)  $\delta$  4.24 (1H, dd, *J* = 4.9, 8.8 Hz), 4.87 (1H, dd, *J* = 8.8, 8.8 Hz), 5.67 (1H, dd, *J* = 4.9, 8.8 Hz), 7.34-7.51 (7H, m), 7.70-7.74 (1H, m), 7.86 (1H, dd, *J* = 1.5, 7.8 Hz), 8.30 (1H, s); <sup>13</sup>C NMR (100 MHz, DMSO-*d*<sub>6</sub>)  $\delta$  56.9, 70.8, 116.4, 117.9, 123.8, 125.1, 125.9, 128.1, 128.8, 129.5, 133.5, 138.7, 143.0, 153.3, 153.5, 157.4, 163.1; HRMS (ESI-TOF) Calcd for C<sub>19</sub>H<sub>13</sub>NO<sub>5</sub>Na [M+Na]<sup>+</sup>: 358.0691; Found: 358.0690.

**1B**: Colorless powder; mp 188-189 °C; [ $\alpha$ ]<sub>D</sub><sup>23</sup> +157.5 (c 0.13, CHCl<sub>3</sub>); IR (KBr)  $\nu$  3047, 2966, 1794, 1731, 1685, 1609, 1372, 1118, 754, 718 cm<sup>-1</sup>; <sup>1</sup>H NMR (400 MHz, CDCl<sub>3</sub>)  $\delta$  1.00 (3H, d, *J* = 7.0 Hz), 1.04 (3H, d, *J* = 7.0 Hz), 2.53-2.58 (1H, m), 4.30 (1H, dd, *J* = 3.7, 9.1 Hz), 4.42 (1H, dd, *J* = 8.8, 8.8 Hz), 4.55-4.59 (1H, m), 7.29-7.31 (2H, m), 7.54-7.61 (2H, m), 7.89 (1H, s); <sup>13</sup>C NMR (100 MHz, CDCl<sub>3</sub>)  $\delta$  14.9, 18.0, 28.6, 58.9, 64.2, 117.2, 118.2, 124.8, 124.9, 128.9, 133.3, 142.8, 153.7, 154.5, 157.9, 164.2; HRMS (ESI-TOF) Calcd for C<sub>16</sub>H<sub>15</sub>NO<sub>5</sub>Na [M+Na]<sup>+</sup>: 324.0848; Found: 324.0864.

**1C**: Colorless powder; mp 166-167 °C; [ $\alpha$ ]<sub>D</sub><sup>23</sup> +68.5 (c 0.14, CHCl<sub>3</sub>); IR (KBr)  $\nu$  3078, 3020, 1780, 1740, 1687, 1606, 1385, 1114, 762, 704 cm<sup>-1</sup>; <sup>1</sup>H NMR (400 MHz, CDCl<sub>3</sub>)  $\delta$  2.92 (1H, dd, *J* = 9.8, 13.5 Hz), 3.52 (1H, dd, *J* = 3.6, 13.5 Hz), 4.24 (1H, dd, *J* = 3.5, 9.0 Hz), 4.34 (1H, dd, *J* = 8.0, 9.0 Hz), 4.77-4.84 (1H, m), 7.26-7.37 (7H, m), 7.55-7.62 (2H,

m), 7.95 (1H, s);  $^{13}\text{C}$  NMR (100 MHz,  $\text{CDCl}_3$ )  $\delta$  37.8, 55.6, 67.1, 117.1, 118.1, 124.5, 125.0, 127.5, 129.05, 129.14, 129.6, 133.5, 135.1, 143.2, 153.1, 154.5, 157.9, 164.2; HRMS (ESI-TOF) Calcd for  $\text{C}_{20}\text{H}_{15}\text{NO}_5\text{Na}$   $[\text{M}+\text{Na}]^+$ : 372.0842; Found: 372.0843.

X-Ray diffraction analysis data of **1A**:  $P2_12_12_1$ ,  $a = 6.1686$  (11) Å,  $b = 15.664$  (3) Å,  $c = 16.396$  (3) Å,  $\alpha 90^\circ$ ,  $\beta 90^\circ$ ,  $\gamma 90^\circ$ ,  $V = 1584.3$  (5) Å<sup>3</sup>,  $Z = 4$ ,  $\rho = 1.465$  g cm<sup>-3</sup>,  $\mu = 0.106$  mm<sup>-1</sup>. The structure was solved by the direct method. And the refinement was performed using the full matrix least-squares, where the final  $R$  and  $wR$  were 0.0327 and 0.0692 for 5186 reflections. CCDC-1552472.

**1D**: Colorless powder; mp 225-227 °C;  $[\alpha]_D^{23}$  -144.2 (c 0.11,  $\text{CH}_2\text{Cl}_2$ ); IR (KBr)  $\nu$  3058, 1781, 1708, 1362, 1220, 1146, 987, 760 cm<sup>-1</sup>;  $^1\text{H}$  NMR (400 MHz,  $\text{CDCl}_3$ )  $\delta$  2.85 (1H, dd,  $J = 7.6, 14.3$  Hz), 3.07 (1H, dd,  $J = 5.4, 14.3$  Hz), 5.73 (1H, dd,  $J = 5.4, 7.6$  Hz), 6.88-6.90 (2H, m), 7.13-7.15 (3H, m), 7.25-7.39 (9H, m), 7.46-7.49 (3H, m), 7.55-7.59 (1H, m), 7.70 (1H, s);  $^{13}\text{C}$  NMR (100 MHz,  $\text{CDCl}_3$ )  $\delta$  37.1, 63.1, 89.6, 117.2, 118.1, 124.4, 124.9, 126.3, 126.7, 126.8, 128.4, 128.5, 128.96, 128.98, 129.1, 129.3, 133.3, 136.3, 137.58, 137.59, 141.2, 143.0, 151.7, 154.6, 157.6, 163.5; HRMS (ESI-TOF) Calcd for  $\text{C}_{32}\text{H}_{23}\text{NO}_5\text{Na}$   $[\text{M}+\text{Na}]^+$ : 524.1474; Found: 524.1455.

#### Typical procedure for photocycloadducts.

In a Pyrex test tube, a solution of **1C** (50.0 mg, 0.143 mmol, 1.00 equiv.) and  $\text{Zn}(\text{ClO}_4)_2 \cdot 6\text{H}_2\text{O}$  (6.78 mg,  $1.82 \times 10^{-2}$  mmol, 0.13 equiv.) were dissolved in anhydrous toluene (1.40 mL) and degassed by argon bubbling for 15 min with stirring. The Pyrex test tube was wrapped roughly with aluminum foil and the external irradiation was directed toward the tube with a working distance of 1 cm. The UV-LED light sources (OMRON ZUV-H20MB) were controlled by OMRON ZUV-C20H [irradiation power was set at maximum value at the controller; mean value and error range of irradiation power of UV-LED light sources was measured by UV meter (USHIO UIT-250) equipped with a UV sensor (UVD-S365) to be revealed as 422 mW/cm<sup>2</sup> and  $\pm 3\%$  respectively]<sup>1</sup> for 48 h. Toluene was removed by evaporation. The resulting mixture was purified by flash silica gel column chromatography (FC) eluted with *n*-hexane/EtOAc = 4/1-1/1 to provide analytically pure cycloadducts **2CE**, **2CF** and a mixture of **2CE** and **2CF** (net 46.0 mg) in 92% yield. Analytically pure cycloadducts **2CE** and **2CF** were subjected to recrystallization from appropriate solvents.

*syn*-HT **2CE**: Colorless prisms from *n*-hexane/ $\text{CHCl}_3$ ; mp 124-126 °C;  $[\alpha]_D^{23}$  +12.9 (c 0.16,  $\text{CHCl}_3$ ); IR (KBr)  $\nu$  3063, 3028, 2977, 2922, 1777, 1697, 1455, 1393, 1249, 1116, 761, 703 cm<sup>-1</sup>;  $^1\text{H}$  NMR (500 MHz,  $\text{CDCl}_3$ )  $\delta$  2.91 (2H, dd,  $J = 10.2, 13.6$  Hz), 3.50 (2H, dd,  $J = 3.1, 13.6$  Hz), 4.29 (2H, dd,  $J = 2.9, 9.2$  Hz), 4.33 (2H, dd,  $J = 7.7, 9.2$  Hz), 4.74-4.79 (2H, m), 5.18 (2H, s), 6.62-6.64 (2H, m), 7.14-7.37 (16H, m);  $^{13}\text{C}$  NMR (125 MHz,  $\text{CDCl}_3$ )  $\delta$  37.9, 44.9, 55.7, 55.9, 67.7, 115.8, 117.2, 125.5, 127.6, 128.8, 129.2, 129.4, 130.0, 134.8, 150.8, 153.9, 161.4, 166.8; HRMS (ESI-TOF) Calcd for  $\text{C}_{40}\text{H}_{30}\text{N}_2\text{O}_{10}\text{Na}$   $[\text{M}+\text{Na}]^+$ : 721.1793; Found: 721.1796.

X-Ray diffraction analysis data of *syn*-HT **2CE**: orthorhombic space group  $P2_12_12_1$ ,  $a = 10.620$  (5) Å,  $b = 15.369$  (6) Å,  $c = 21.972$  (9) Å,  $\alpha 90^\circ$ ,  $\beta 90^\circ$ ,  $\gamma 90^\circ$ ,  $V = 3586$  (3) Å<sup>3</sup>,  $Z = 4$ ,  $\rho = 1.489$  g cm<sup>-3</sup>,  $\mu = 0.321$  mm<sup>-1</sup>. The structure was solved by the direct method. And the refinement was performed using the full matrix least-squares, where the final  $R$  and  $wR$  were 0.0956 and 0.2672 for 6314 reflections. CCDC-1484443.

*syn*-HT **2CF**: Colorless prisms from *n*-hexane/EtOAc; mp 328-330 °C;  $[\alpha]_D^{23} +133.0$  (c 0.13, CH<sub>3</sub>CN); IR (KBr)  $\nu$  3067, 3033, 2974, 2919, 1775, 1747, 1698, 1493, 1356, 1245, 1116, 754, 702 cm<sup>-1</sup>; <sup>1</sup>H NMR (500 MHz, CDCl<sub>3</sub>)  $\delta$  2.92 (2H, dd,  $J = 9.6, 13.6$  Hz), 3.47 (2H, dd,  $J = 3.3, 13.6$  Hz), 4.28 (2H, dd,  $J = 2.6, 8.8$  Hz), 4.42 (2H, dd,  $J = 8.5, 8.8$  Hz), 4.78-4.83 (2H, m), 5.08 (2H, s), 6.64 (2H, d,  $J = 8.0$  Hz), 7.13-7.38 (16H, m); <sup>13</sup>C NMR (125 MHz, CDCl<sub>3</sub>)  $\delta$  37.1, 44.6, 55.6, 55.8, 67.3, 115.8, 117.2, 125.4, 127.6, 128.8, 129.2, 129.6, 130.0, 134.8, 150.8, 153.8, 161.3, 167.1; HRMS (ESI-TOF) Calcd for C<sub>40</sub>H<sub>30</sub>N<sub>2</sub>O<sub>10</sub>Na [M+Na]<sup>+</sup>: 721.1793; Found: 721.1794.

X-Ray diffraction analysis data of *syn*-HT **2CF**: orthorhombic space group  $P2_12_12_1$ ,  $a = 8.2036$  (10) Å,  $b = 18.123$  (2) Å,  $c = 21.423$  (3) Å,  $\alpha 90^\circ$ ,  $\beta 90^\circ$ ,  $\gamma 90^\circ$ ,  $V = 3185.0$  (7) Å<sup>3</sup>,  $Z = 4$ ,  $\rho = 1.457$  g cm<sup>-3</sup>,  $\mu = 0.106$  mm<sup>-1</sup>. The structure was solved by the direct method. And the refinement was performed using the full matrix least-squares, where the final  $R$  and  $wR$  were 0.0552 and 0.1422 for 8883 reflections. CCDC-1552473.

A 50:50 diastereomeric mixture of *syn*-HT **2BE** and *syn*-HT **2BF**: Colorless prisms from CH<sub>3</sub>CN; mp 380-382 °C;  $[\alpha]_D^{23} +59.6$  (c 0.21, CH<sub>3</sub>CN); IR (KBr)  $\nu$  2973, 1774, 1695, 1588, 1490, 1367, 1217, 1186, 761 cm<sup>-1</sup>; <sup>1</sup>H NMR (400 MHz, DMSO-*d*<sub>6</sub>)  $\delta$  0.83 (6H, d,  $J = 6.9$  Hz), 0.91 (6H, d,  $J = 6.9$  Hz), 0.93 (6H, d,  $J = 6.8$  Hz), 0.97 (6H, d,  $J = 6.8$  Hz), 2.22-2.34 (2H, m), 2.34-2.44 (2H, m), 4.41-4.64 (12H, m), 4.98 (2H, s), 5.02 (2H, s), 6.63-6.71 (4H, m), 6.95-6.99 (4H, m), 7.12-7.39 (4H, m), 7.22-7.28 (4H, m); <sup>13</sup>C NMR (100 MHz, DMSO-*d*<sub>6</sub>)  $\delta$  14.1, 14.3, 17.2, 17.4, 27.57, 27.58, 43.5, 44.3, 54.7, 55.4, 58.4, 58.6, 64.6, 64.8, 115.9, 116.3, 116.5, 116.6, 124.9, 125.1, 128.7, 128.8, 129.7, 129.9, 150.3, 150.5, 154.3, 154.4, 160.6, 160.9, 165.80, 165.81; HRMS (ESI-TOF) Calcd for C<sub>32</sub>H<sub>30</sub>N<sub>2</sub>O<sub>10</sub>Na [M+Na]<sup>+</sup>: 625.1798; Found: 625.1771.

X-Ray diffraction analysis data of a 50:50 diastereomeric mixture of *syn*-HT **2BE** and **2BF**: orthorhombic space group  $P2_12_12_1$ ,  $a = 20.0542$  (4) Å,  $b = 11.4435$  (2) Å,  $c = 12.2782$  (2) Å,  $\alpha 90^\circ$ ,  $\beta 90^\circ$ ,  $\gamma 90^\circ$ ,  $V = 2817.72$  (9) Å<sup>3</sup>,  $Z = 4$ ,  $\rho = 1.420$  g cm<sup>-3</sup>,  $\mu = 0.89$  mm<sup>-1</sup>. The structure was solved by the direct method. And the refinement was performed using the full matrix least-squares, where the final  $R$  and  $wR$  were 0.089 and 0.302 for 5177 reflections. CCDC-1885142.

### Removal of the chiral auxiliary and the stereoselective reduction.

In a round-bottom flask, NaBH<sub>4</sub> (18.0 mg, 0.476 mmol, 25.6 equiv.) was added to a solution of *syn*-HT **2CE** (13.0 mg, 0.0186 mmol, 1.00 equiv.) in THF (2.00 mL) at room temperature and stirred for 4 h. The resulting reaction mixture was poured into saturated aqueous NH<sub>4</sub>Cl and stirred for 1 h. The resulting suspension was diluted with water and extracted with EtOAc. The combined organic layer was washed with brine, dried over anhydrous MgSO<sub>4</sub>, filtered and evaporated. The crude mixture was purified by flash silica gel column chromatography (FC) eluted with *n*-hexane/EtOAc = 4/1-1/1 to provide analytically pure chromane-2-ol derivative **3** (2.50 mg) in 37% yield.

**3**: Colorless powder; mp 130-132 °C; [ $\alpha$ ]<sub>D</sub><sup>23</sup> +4.38 (c 0.16, MeOH); IR (KBr)  $\nu$  3403, 2928, 1743, 1586, 1487, 1455, 1406, 1235, 1189, 1122, 1106, 1057, 974, 757 cm<sup>-1</sup>; <sup>1</sup>H NMR (600 MHz, CD<sub>3</sub>OD)  $\delta$  3.61 (1H, s), 3.73 (1H, d, *J* = 12.4 Hz), 3.96 (1H, d, *J* = 12.4 Hz), 4.05 (1H, d, *J* = 12.4 Hz), 4.06 (1H, d, *J* = 12.4 Hz), 4.16 (1H, s), 6.78 (1H, app t, *J* = 7.5 Hz), 6.82 (1H, dd, *J* = 0.6, 8.0 Hz), 6.90 (1H, d, *J* = 8.0 Hz), 7.00 (1H, app t, *J* = 7.4 Hz), 7.10 (1H, app t, *J* = 7.7 Hz), 7.12 (1H, app t, *J* = 7.6 Hz), 7.20-7.26 (2H, m); <sup>13</sup>C NMR (150 MHz, CD<sub>3</sub>OD)  $\delta$  36.2, 43.5, 46.8, 59.1, 60.4, 62.5, 98.9, 116.6, 118.5, 120.7, 120.8, 123.6, 123.8, 128.9, 129.5, 130.6, 130.9, 151.5, 156.6, 175.7; HRMS (ESI-TOF) Calcd for C<sub>20</sub>H<sub>18</sub>N<sub>2</sub>O<sub>6</sub>Na [M+Na]<sup>+</sup>: 377.1001; Found: 377.1000.

### Limitation of chiral coumarin-3-carboxamides.

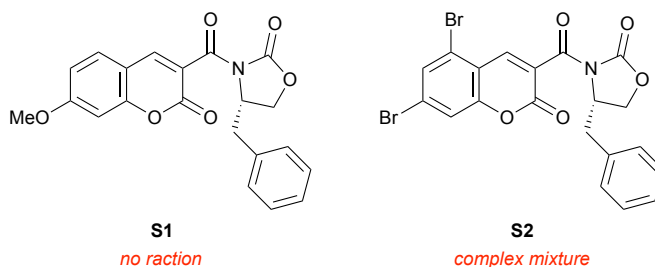

**Fig. S4.** Chiral coumarin-3-carboxamide **S1** did not dimerize under photoirradiation. In the case of **S2**, a complex mixture of unknown products were observed in <sup>1</sup>H NMR spectrum.

**S1**: Pale yellow powder; mp 211-213 °C; [ $\alpha$ ]<sub>D</sub><sup>23</sup> +77.1 (c 0.49, CH<sub>2</sub>Cl<sub>2</sub>); IR (KBr)  $\nu$  3029, 1787, 1719, 1605, 1387, 1356, 1213, 1117, 932, 759, 703 cm<sup>-1</sup>; <sup>1</sup>H NMR (400 MHz, CDCl<sub>3</sub>)  $\delta$  3.06 (1H, dd, *J* = 7.7, 13.6 Hz), 3.18 (1H, dd, *J* = 3.5, 13.6 Hz), 3.89 (3H, s), 4.27 (1H, dd, *J* = 3.4, 9.0 Hz), 4.43 (1H, dd, *J* = 8.6, 9.0 Hz), 4.48-4.88 (1H, m), 7.03 (1H, dd, *J* = 2.4, 8.7 Hz), 7.09 (1H, d, *J* = 2.4 Hz), 7.22-7.30 (1H, m), 7.33 (4H, d, *J* = 4.4 Hz), 7.77 (1H, d, *J* = 8.7 Hz), 8.27 (1H, s); <sup>13</sup>C NMR (100 MHz, CDCl<sub>3</sub>)  $\delta$  36.6, 54.5, 56.2, 66.8, 100.8, 111.4, 113.2, 120.3, 127.0, 128.6, 129.6, 130.7, 135.4, 143.2, 152.9, 155.7, 157.6, 163.7, 163.9; HRMS (ESI-TOF) Calcd for C<sub>21</sub>H<sub>17</sub>NO<sub>6</sub>Na [M+Na]<sup>+</sup>: 402.0953; Found: 402.0938.

**S2:** Pale orange powder; mp 220-222 °C;  $[\alpha]_D^{23} +81.8$  (c 0.80, CH<sub>2</sub>Cl<sub>2</sub>); IR (KBr)  $\nu$  3058, 1784, 1736, 1685, 1388, 1366, 1004, 962, 745, 703 cm<sup>-1</sup>; <sup>1</sup>H NMR (400 MHz, CDCl<sub>3</sub>)  $\delta$  3.08 (1H, dd,  $J = 7.3, 13.6$  Hz), 3.17 (1H, dd,  $J = 3.5, 13.6$  Hz), 4.29 (1H, dd,  $J = 3.3, 8.9$  Hz), 4.46 (1H, dd,  $J = 8.6, 8.9$  Hz), 4.79-4.94 (1H, m), 7.25-7.30 (1H, m), 7.34 (4H, d,  $J = 4.4$  Hz), 8.16 (1H, d,  $J = 2.3$  Hz), 8.25 (1H, d,  $J = 2.3$  Hz); <sup>13</sup>C NMR (100 MHz, CDCl<sub>3</sub>)  $\delta$  36.4, 54.3, 67.0, 111.4, 110.4, 116.8, 120.8, 125.7, 127.0, 128.6, 129.7, 131.1, 135.2, 137.7, 140.8, 149.3, 153.0, 156.3, 162.7; HRMS (ESI-TOF) Calcd for C<sub>20</sub>H<sub>13</sub><sup>79</sup>Br<sup>81</sup>BrNO<sub>5</sub>Na [M+Na]<sup>+</sup>: 529.9038; Found: 529.9019.



# $^1\text{H}$ NMR and $^{13}\text{C}$ NMR spectra of coumarins and photodimers

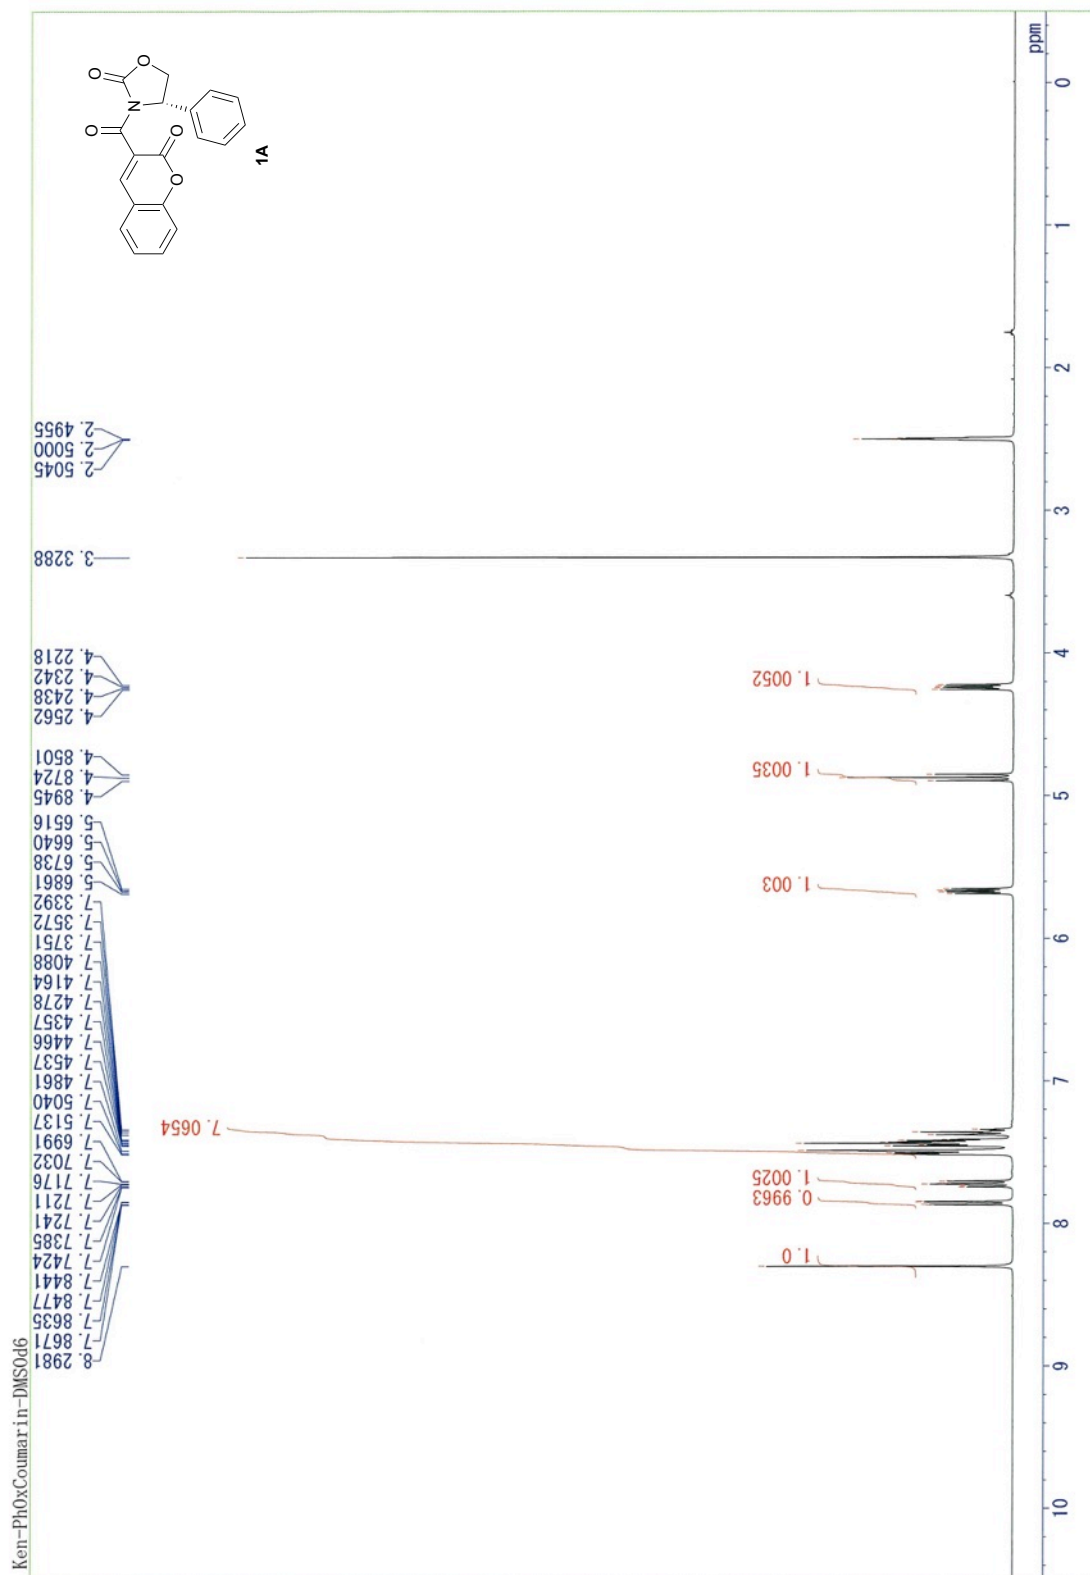

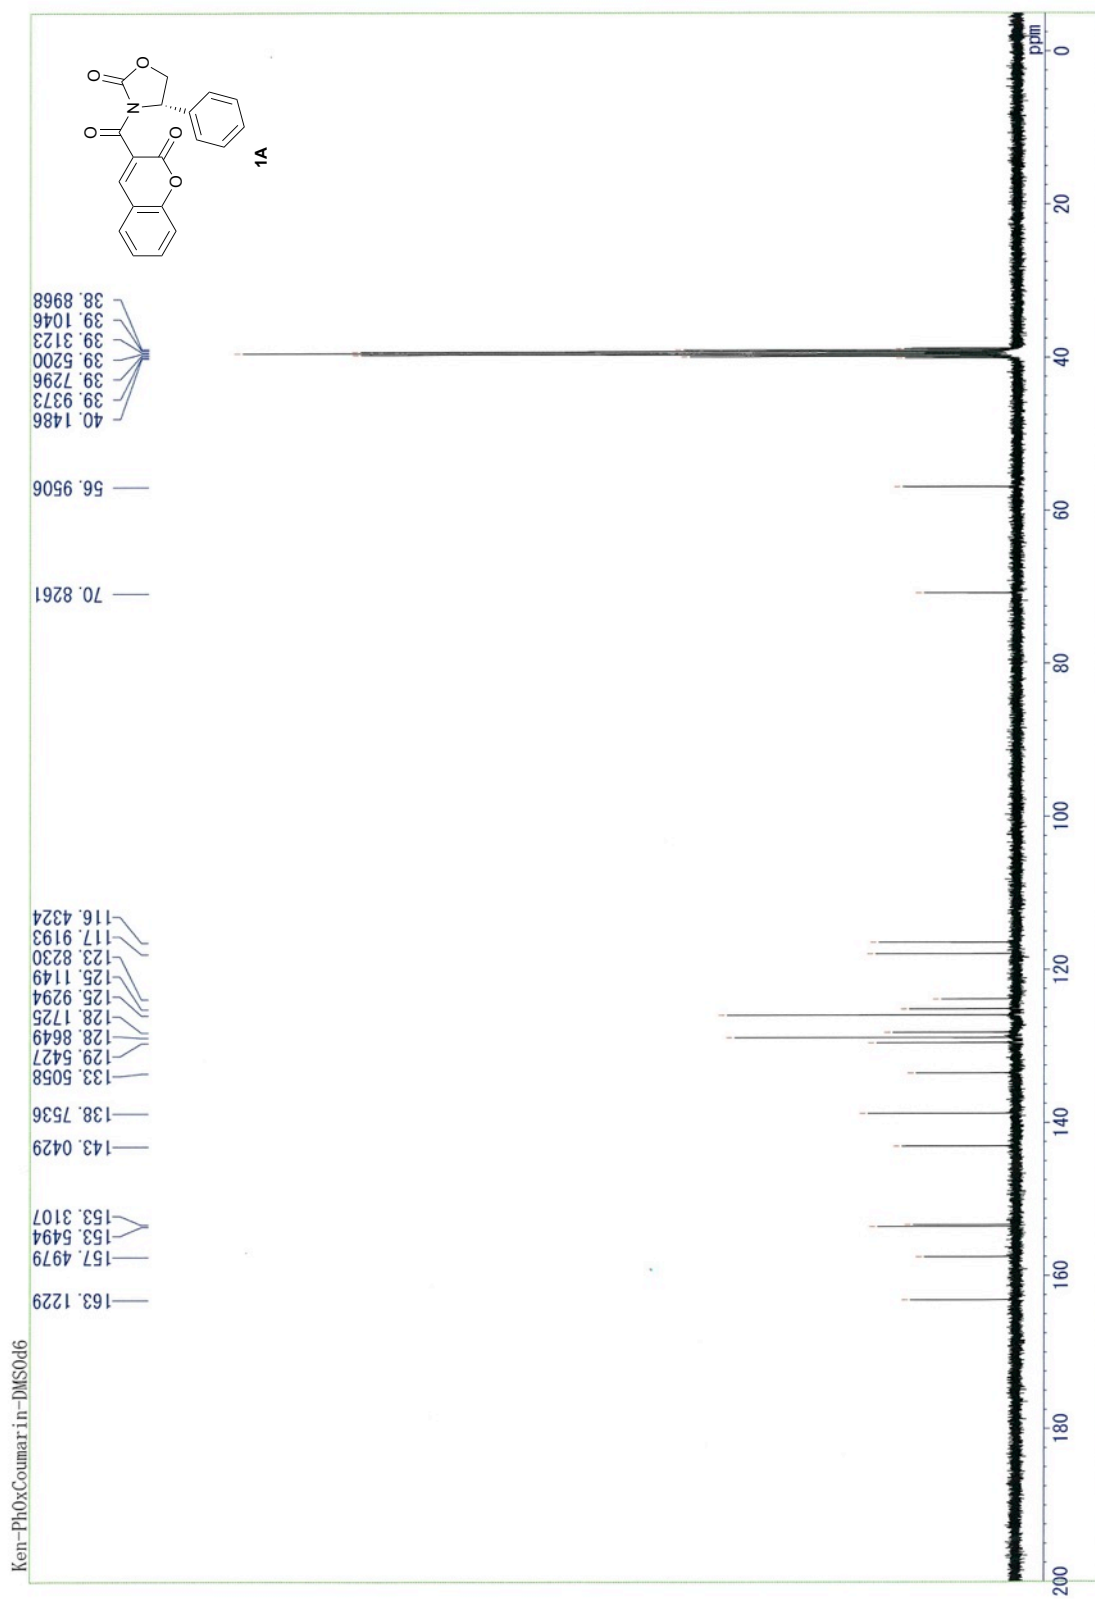

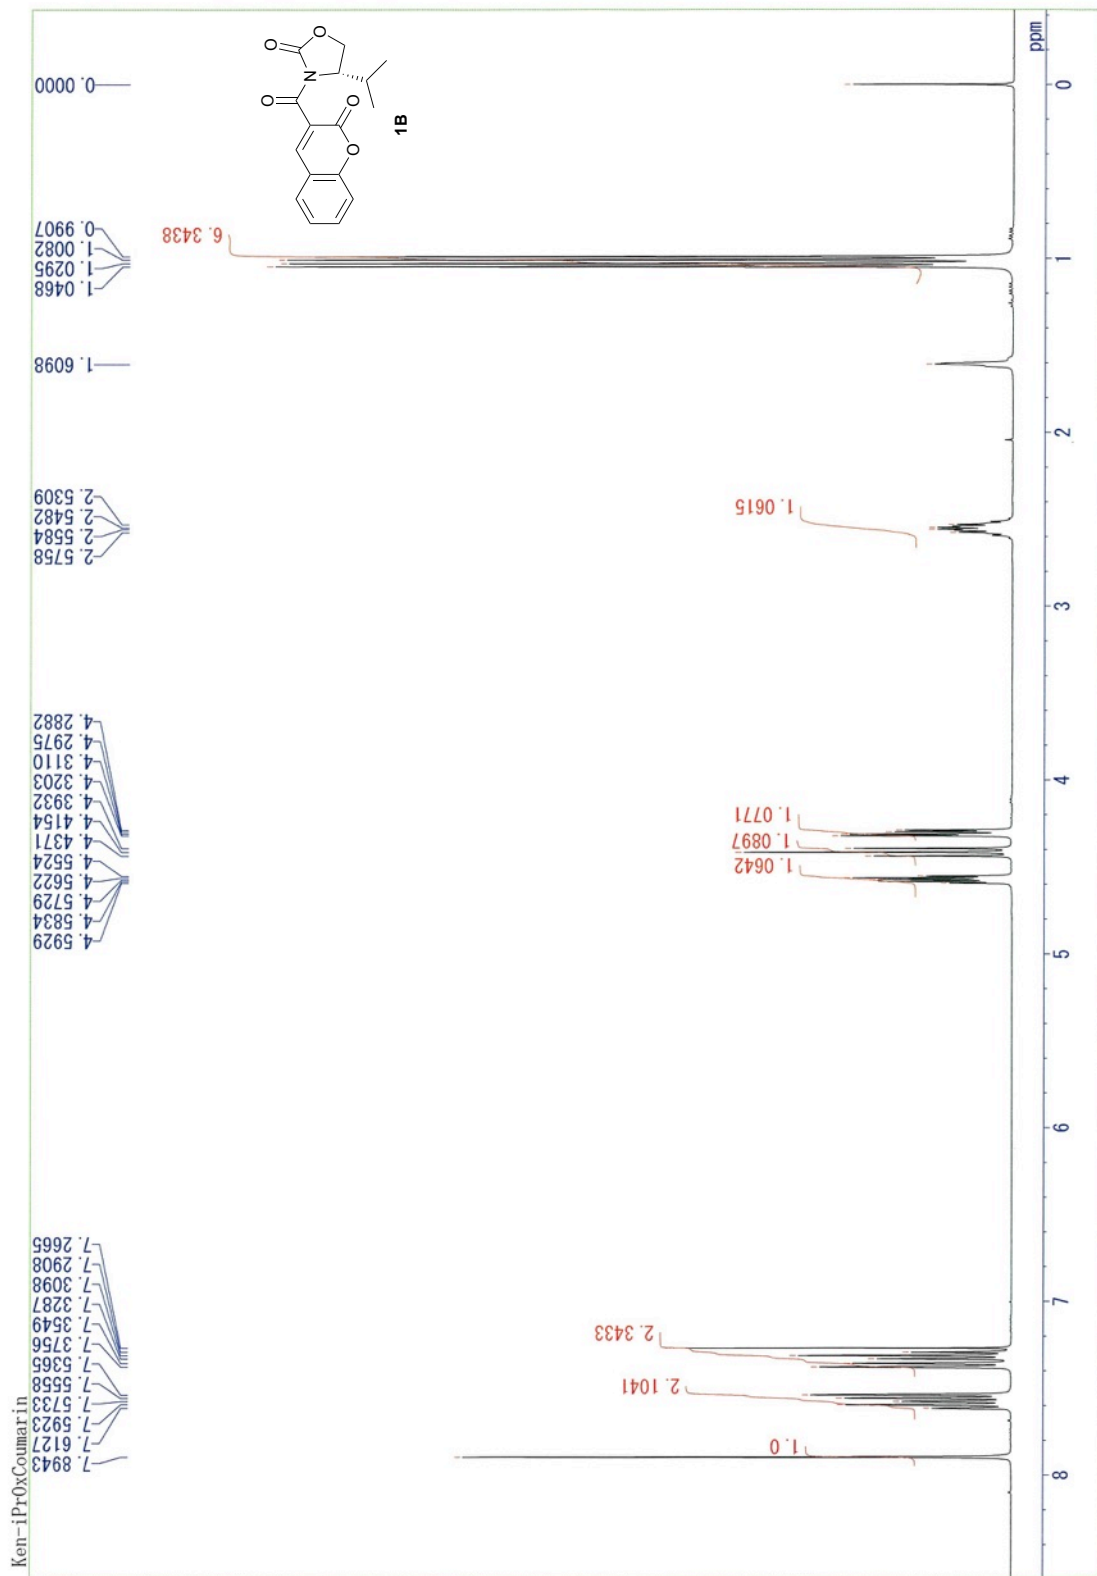

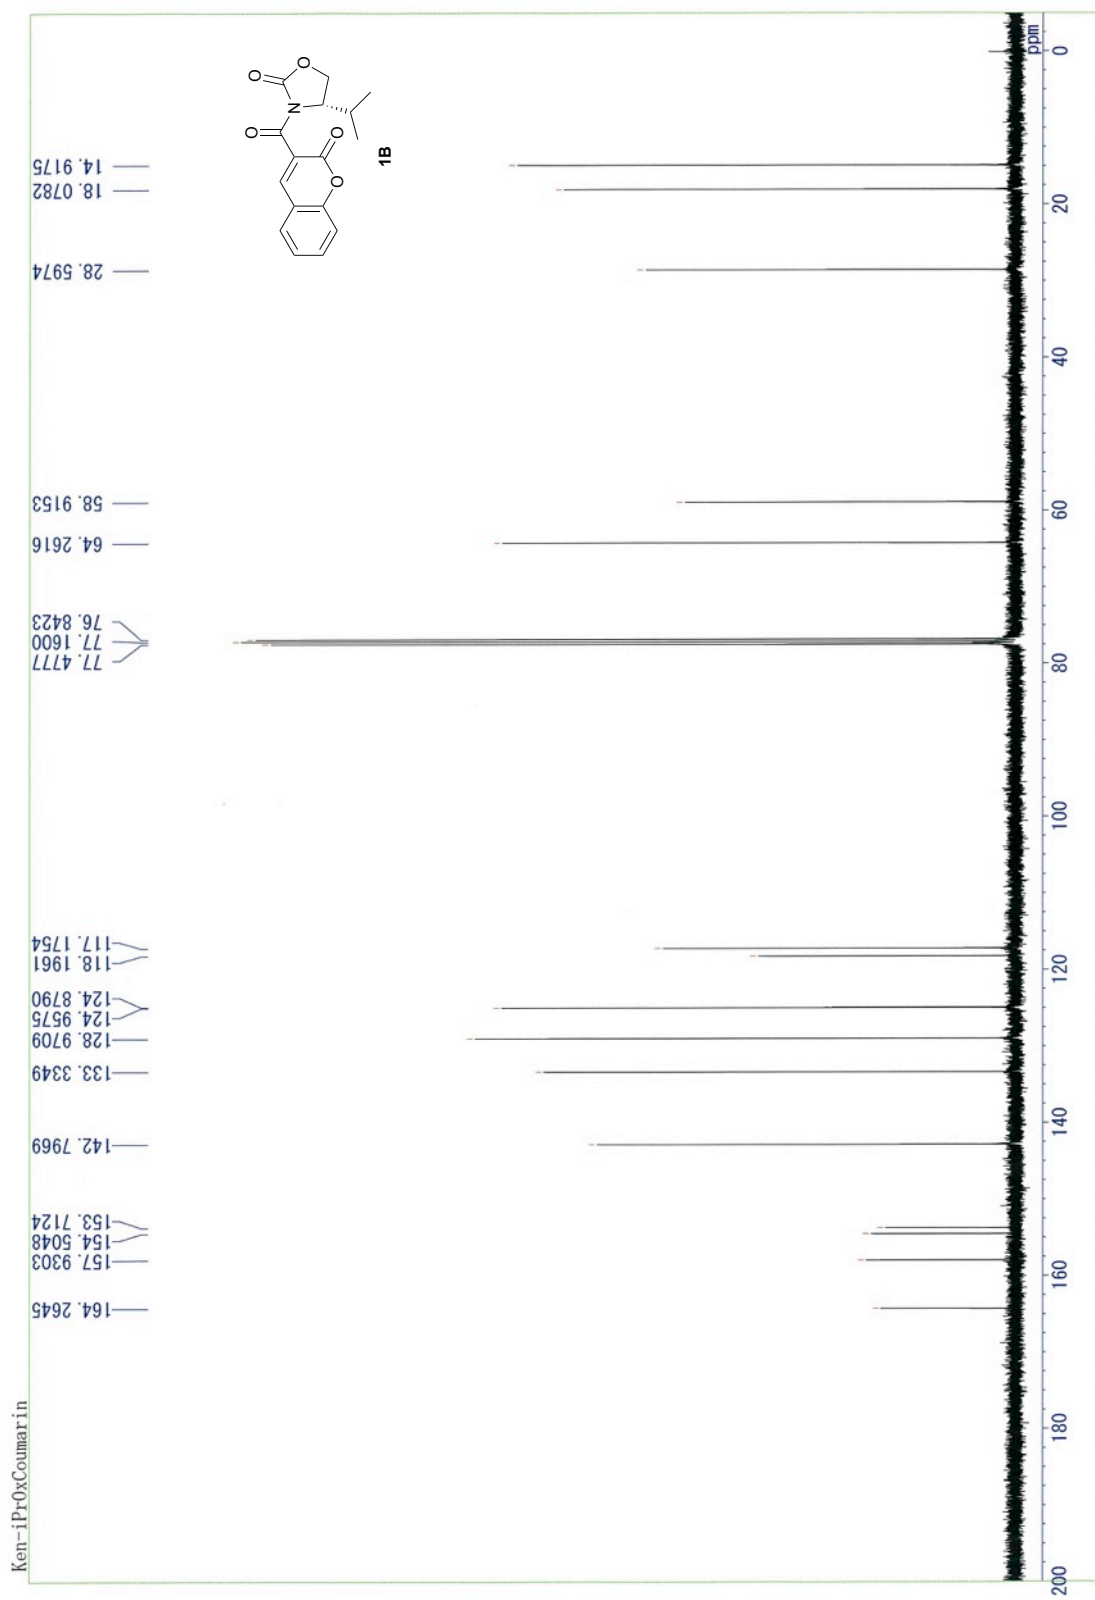

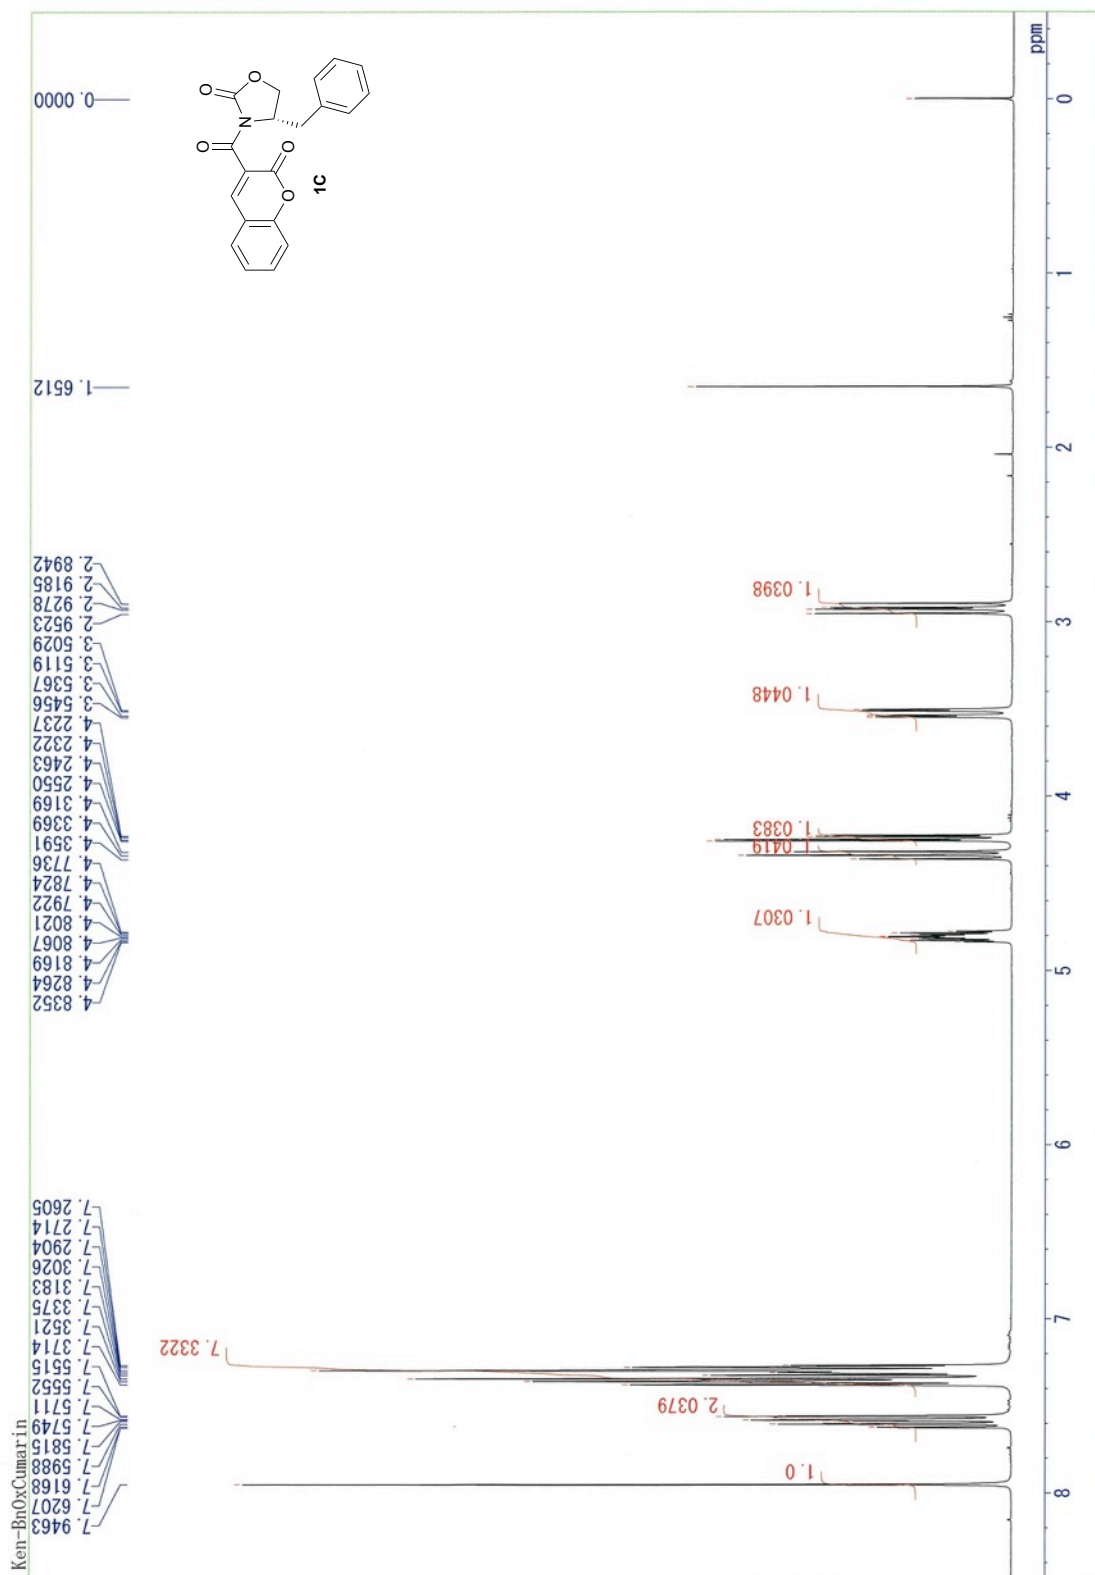

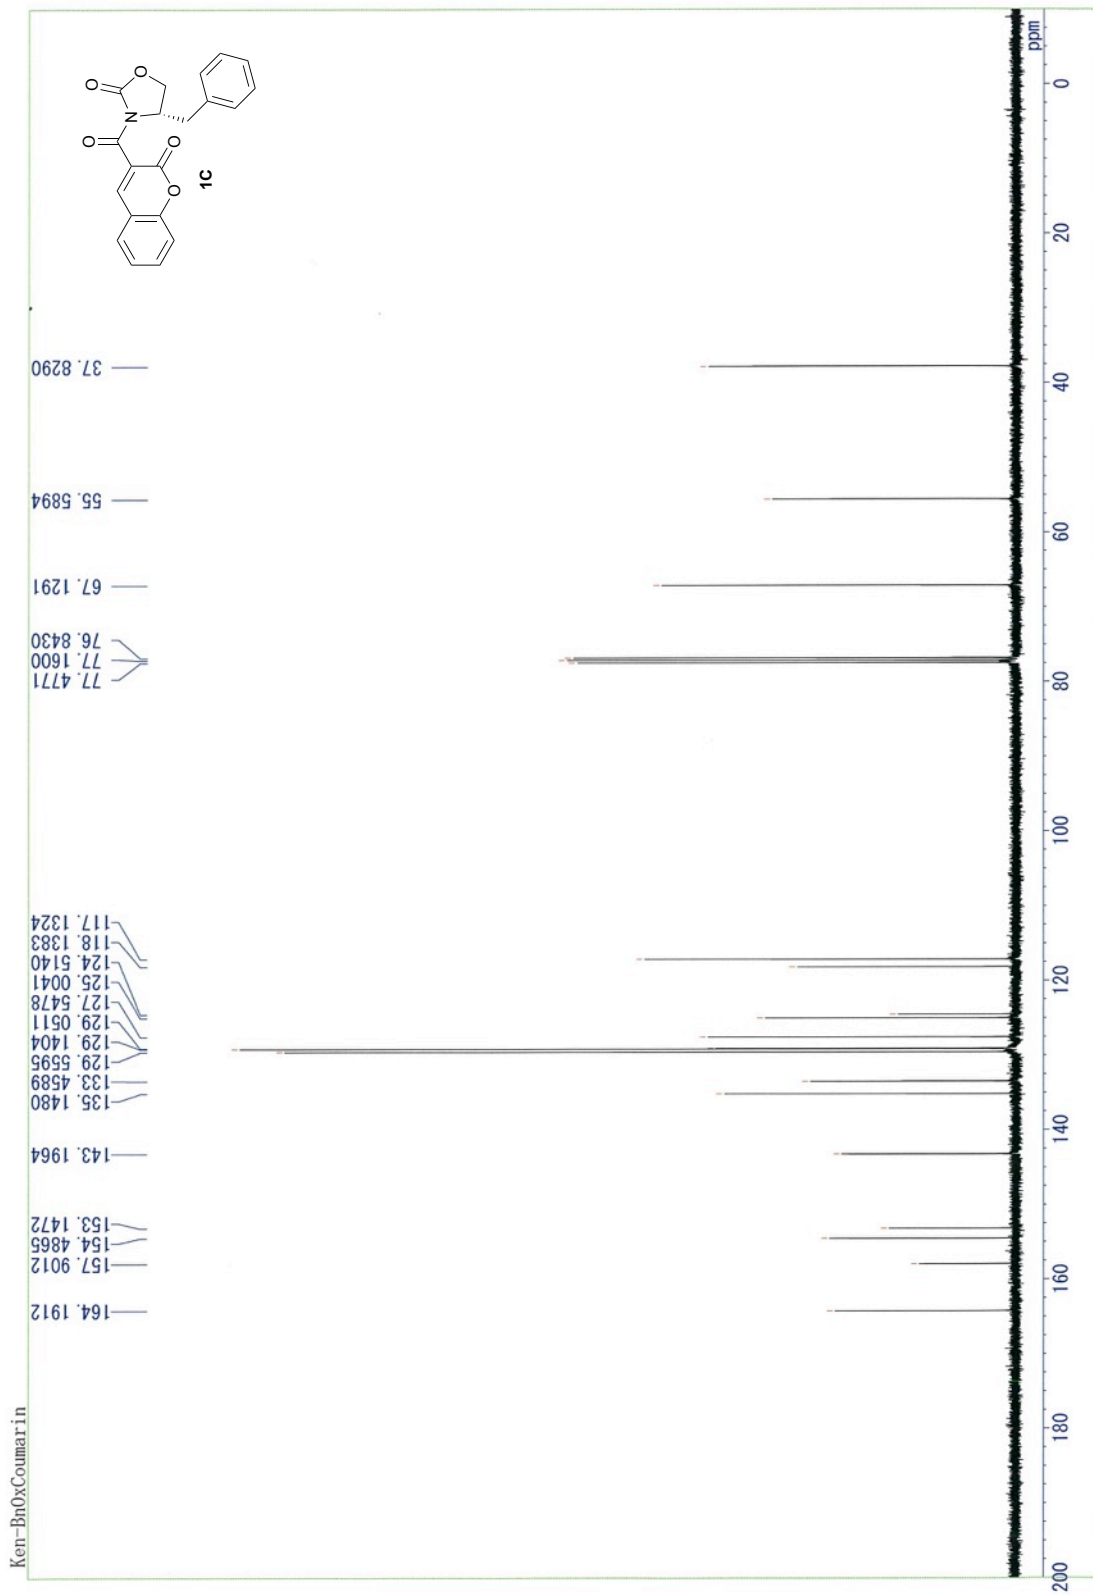

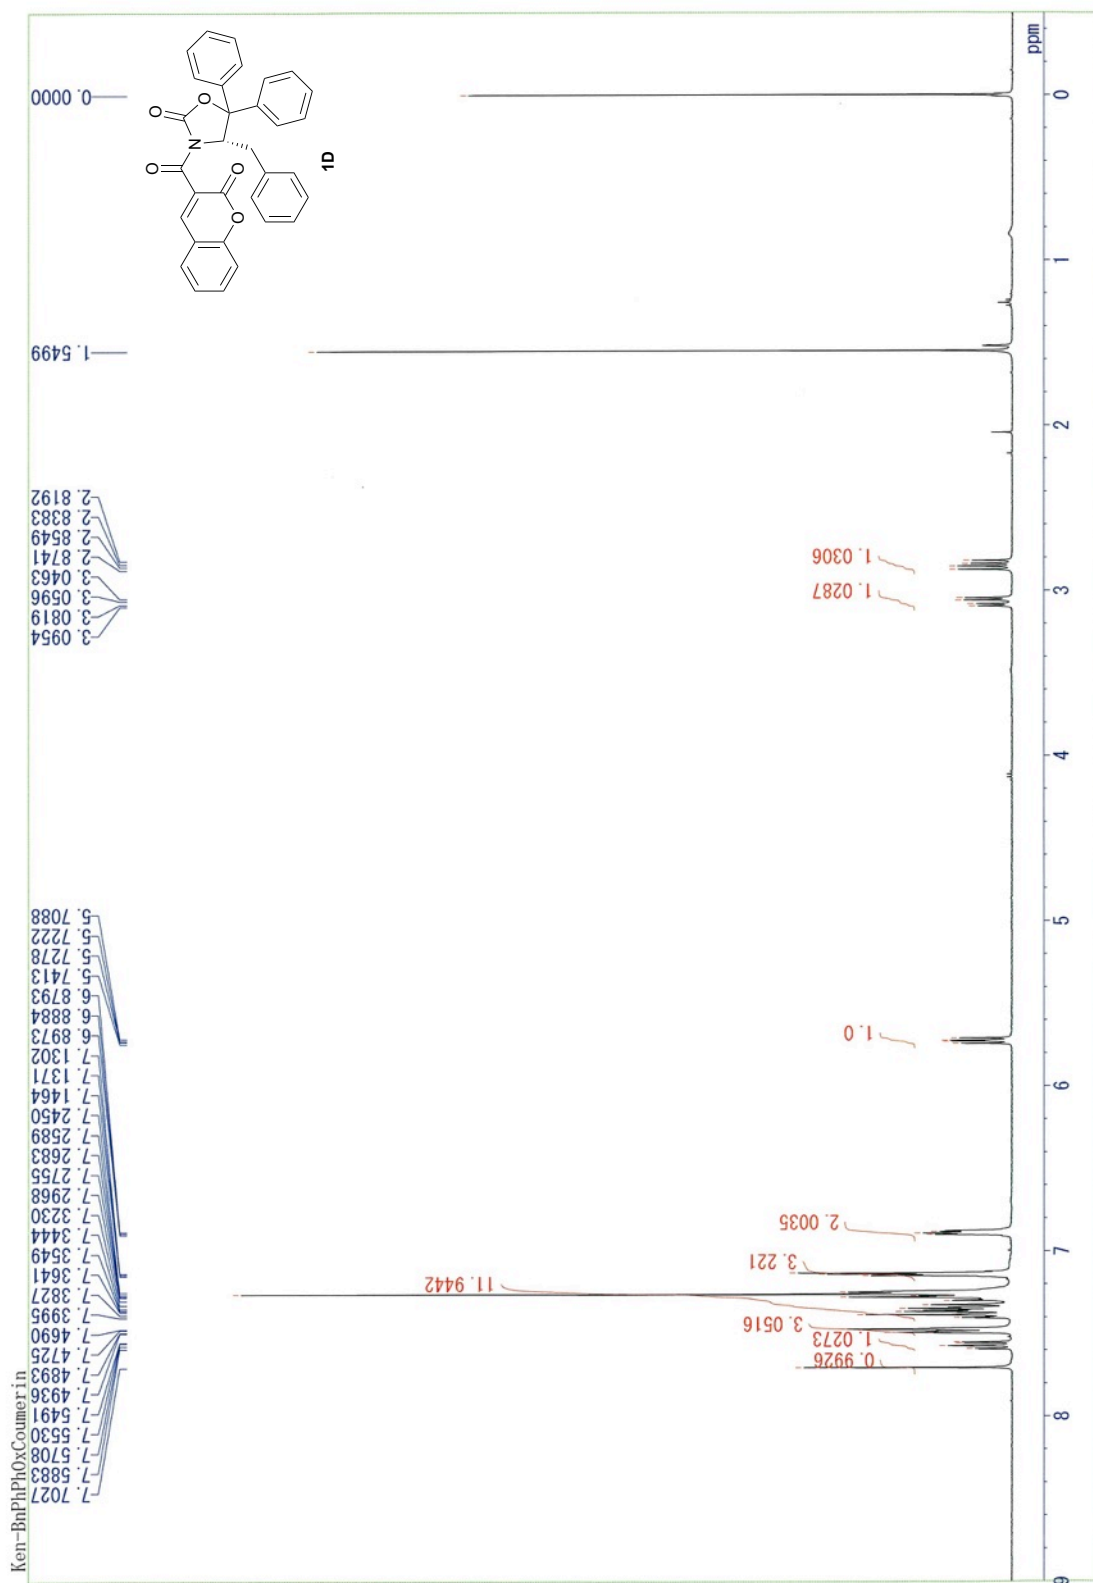

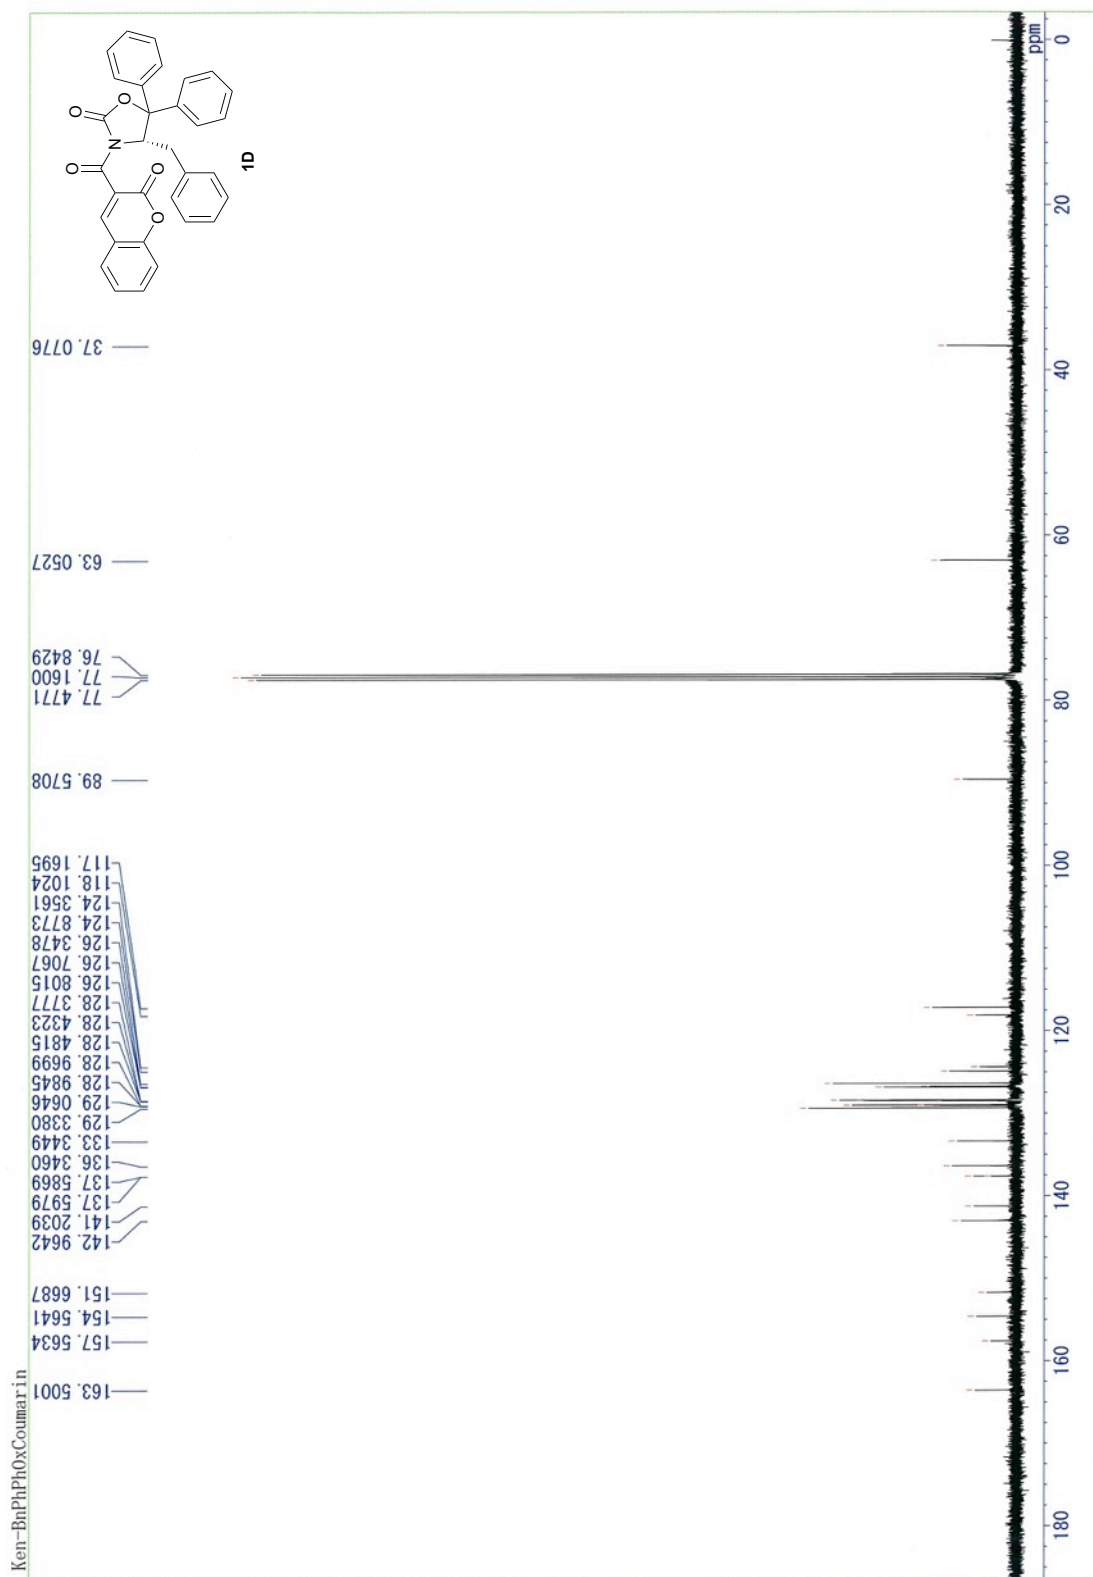



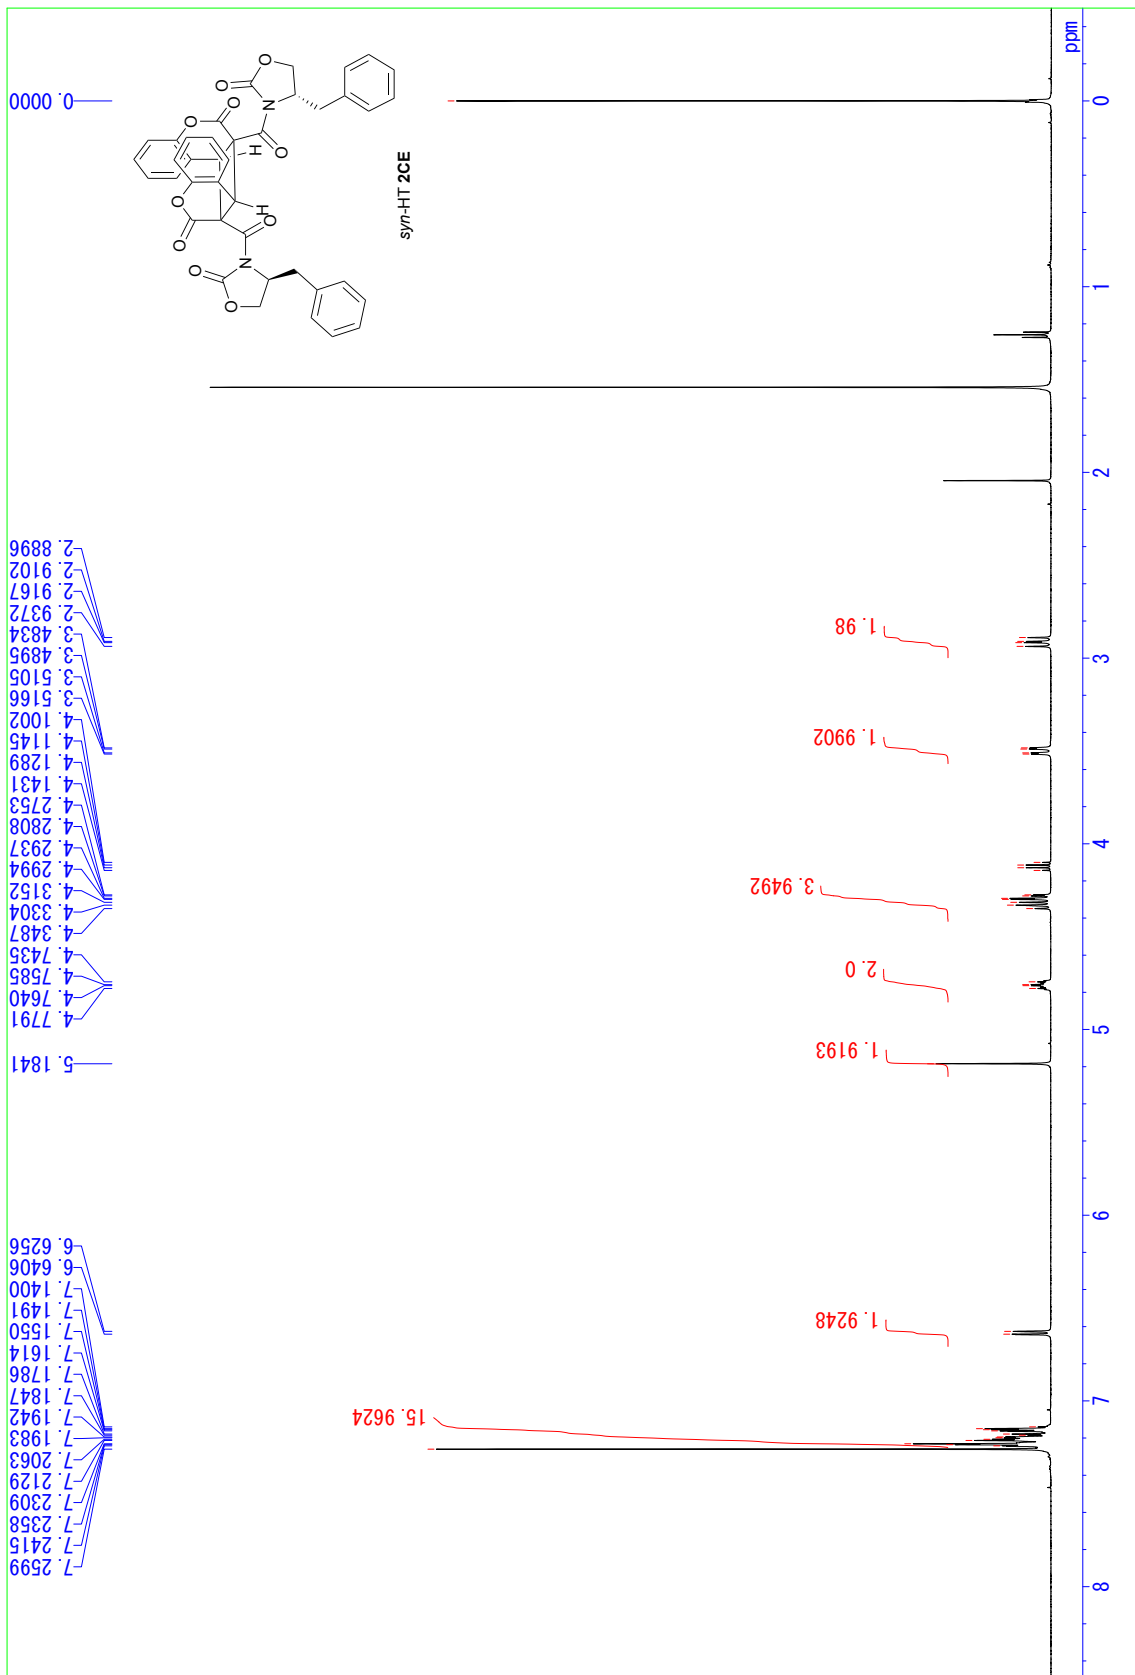

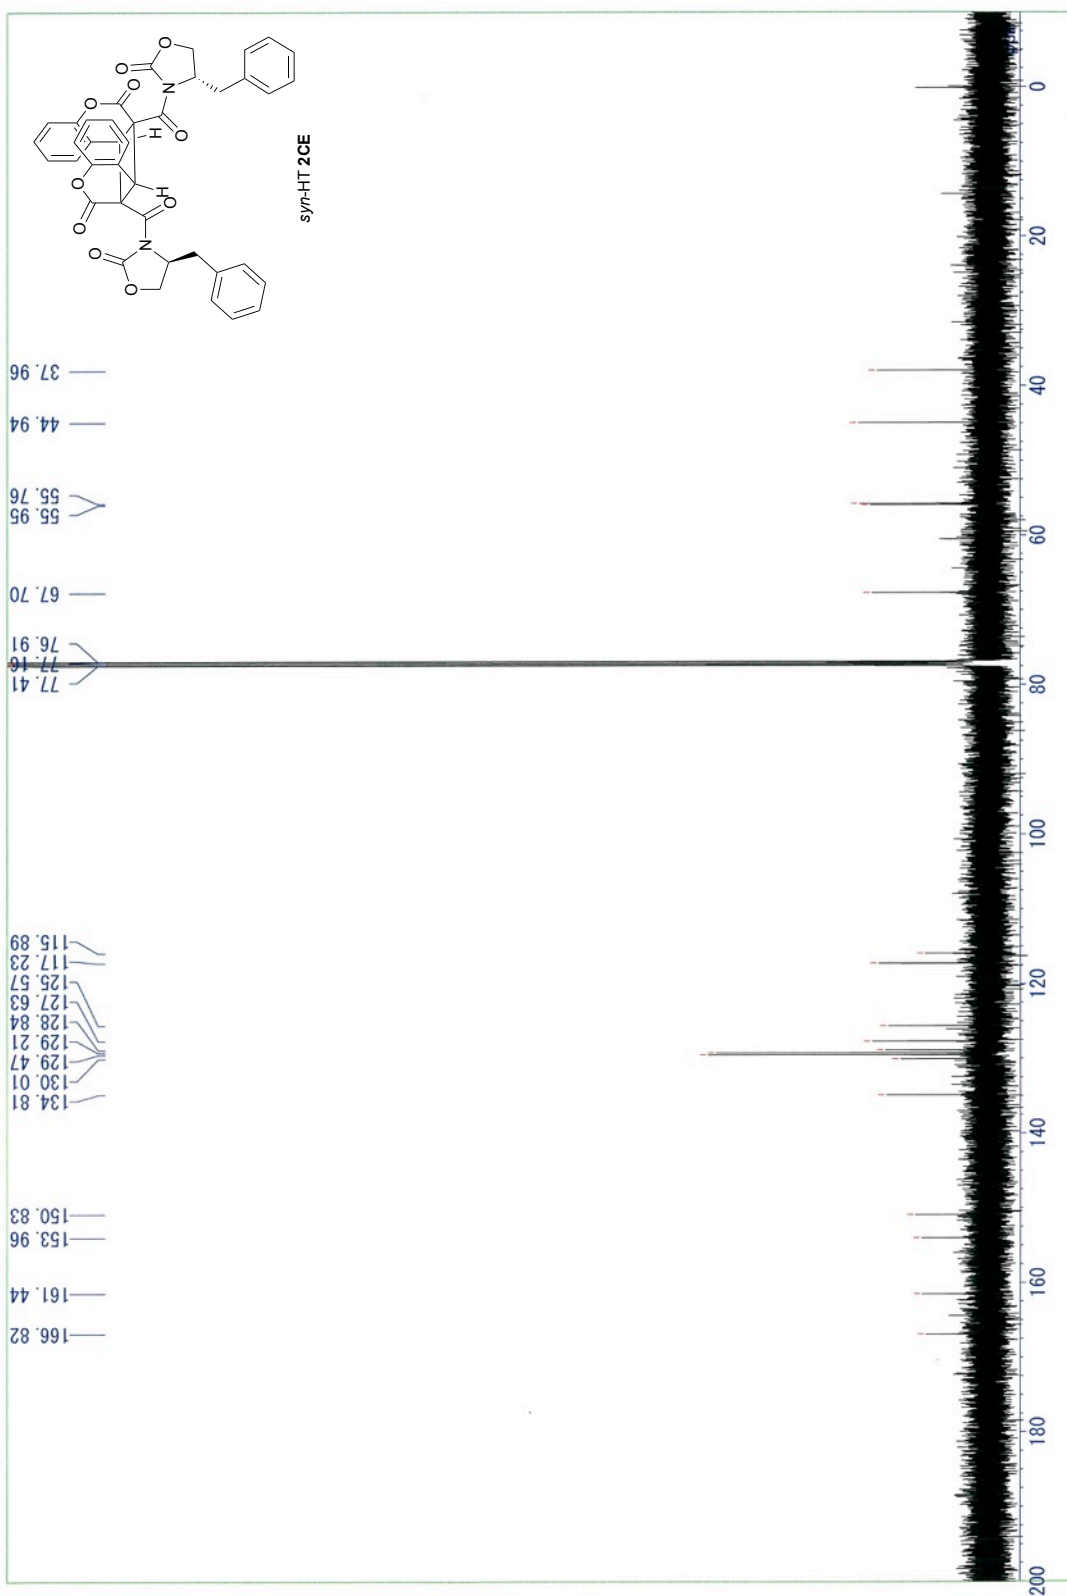

syn-HT (major) 部分和聚峰中不成分

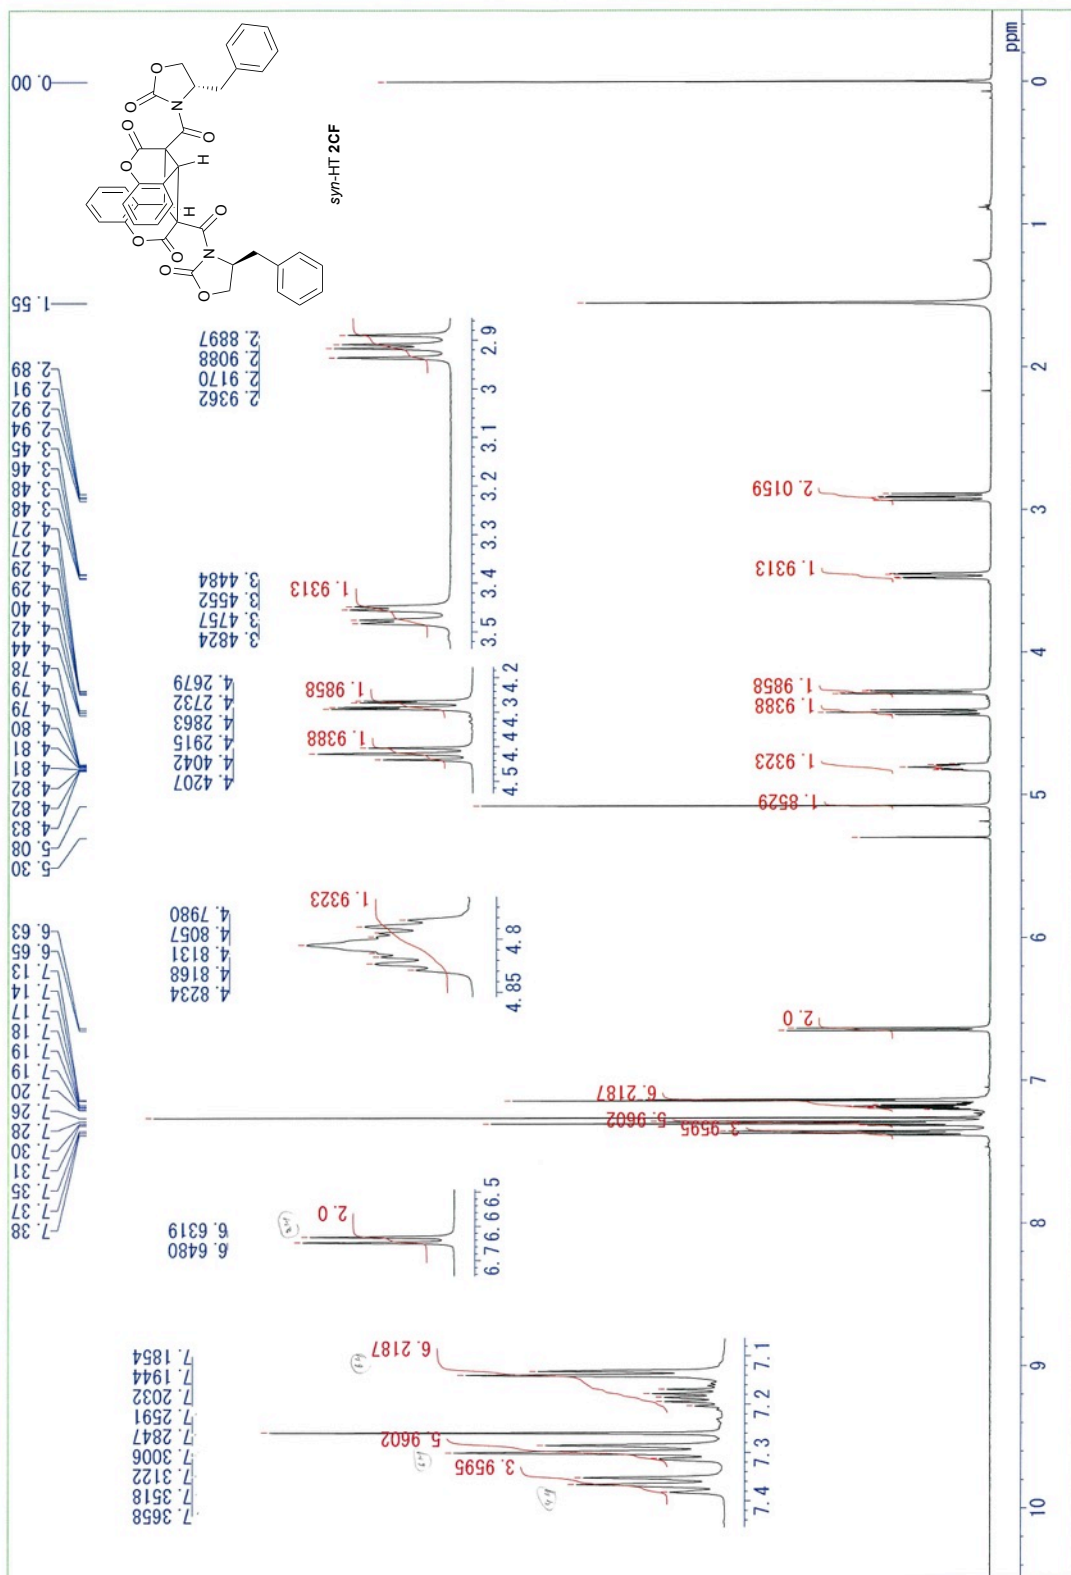

Syn-HT (major) 7-14-14  
150.84, 153.80, 161.37, 167.13

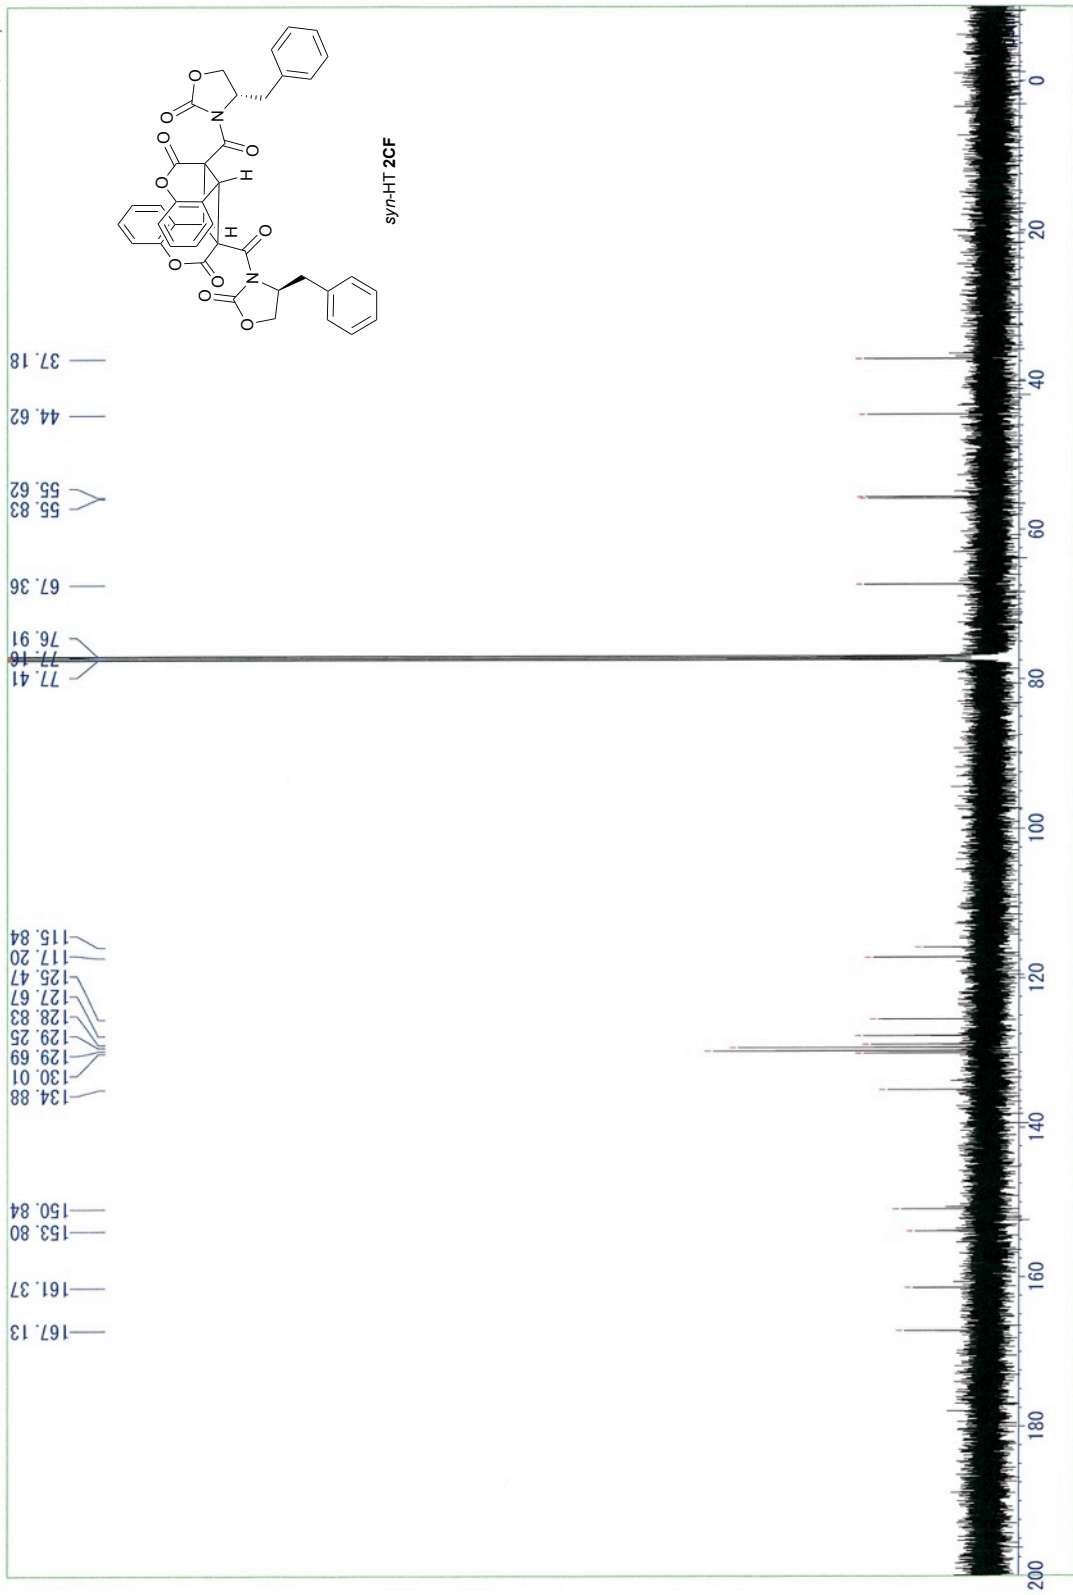

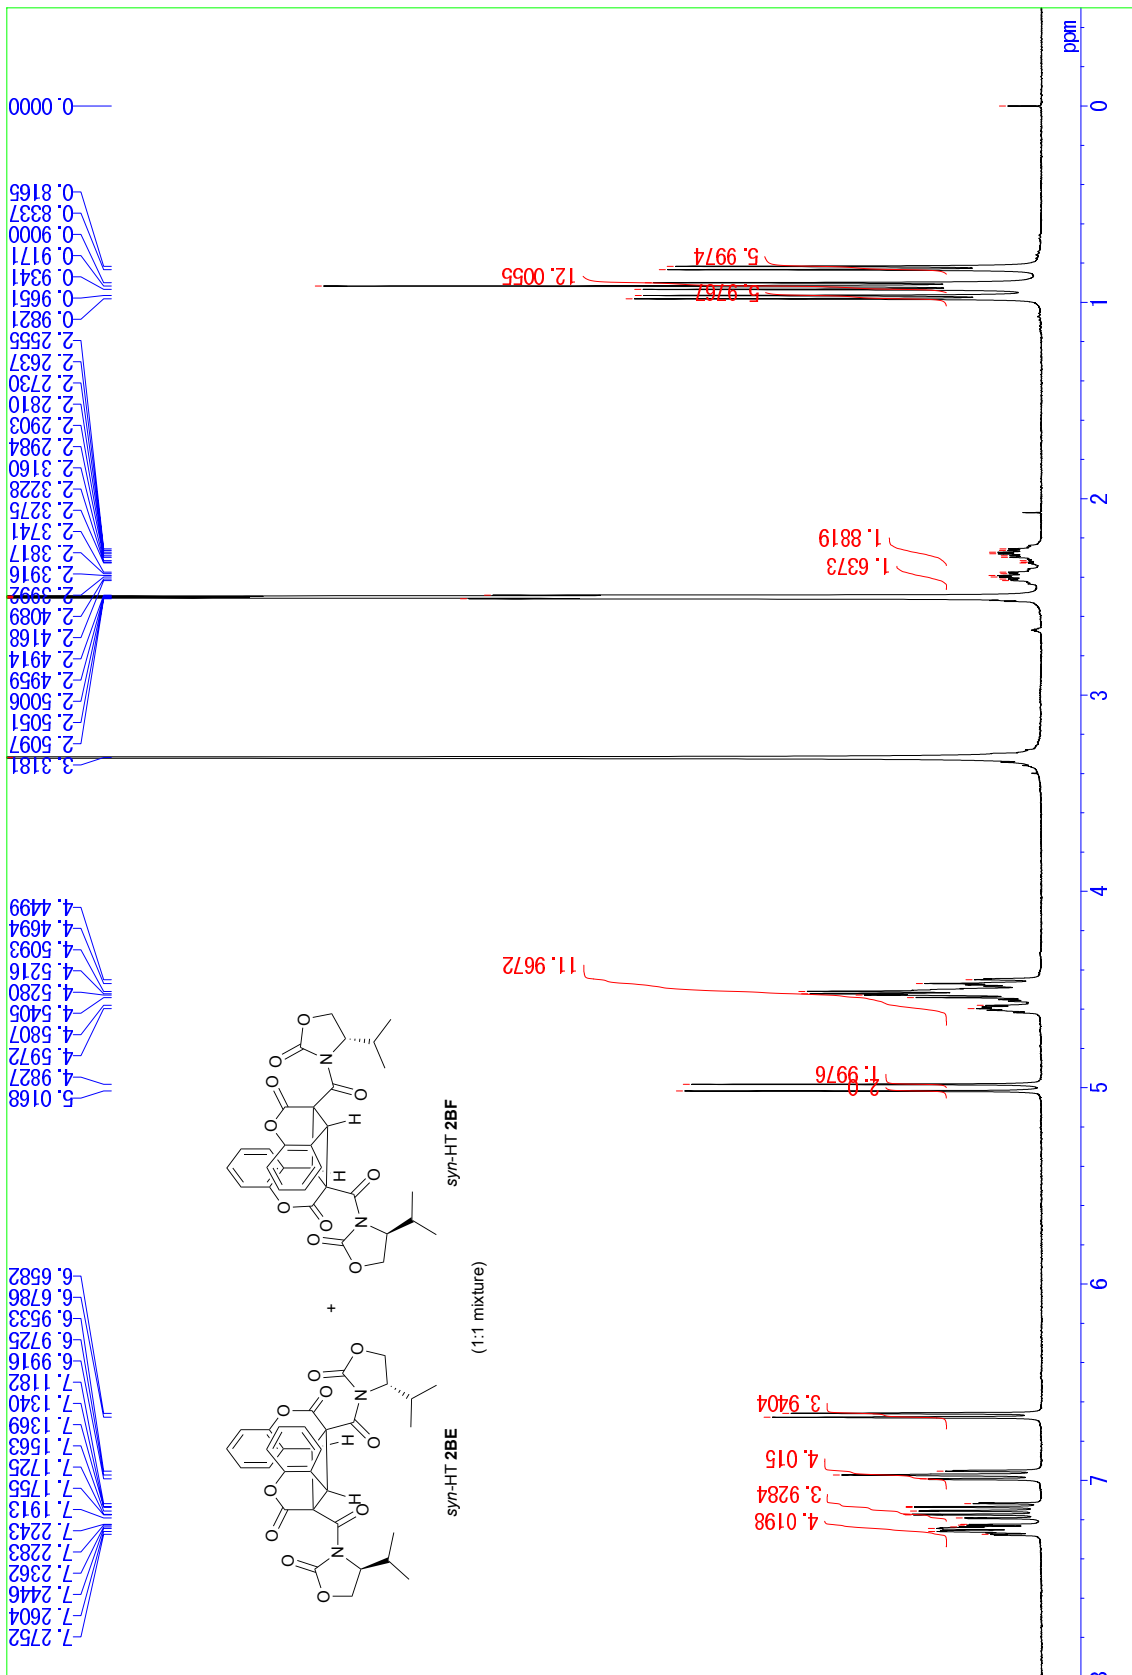

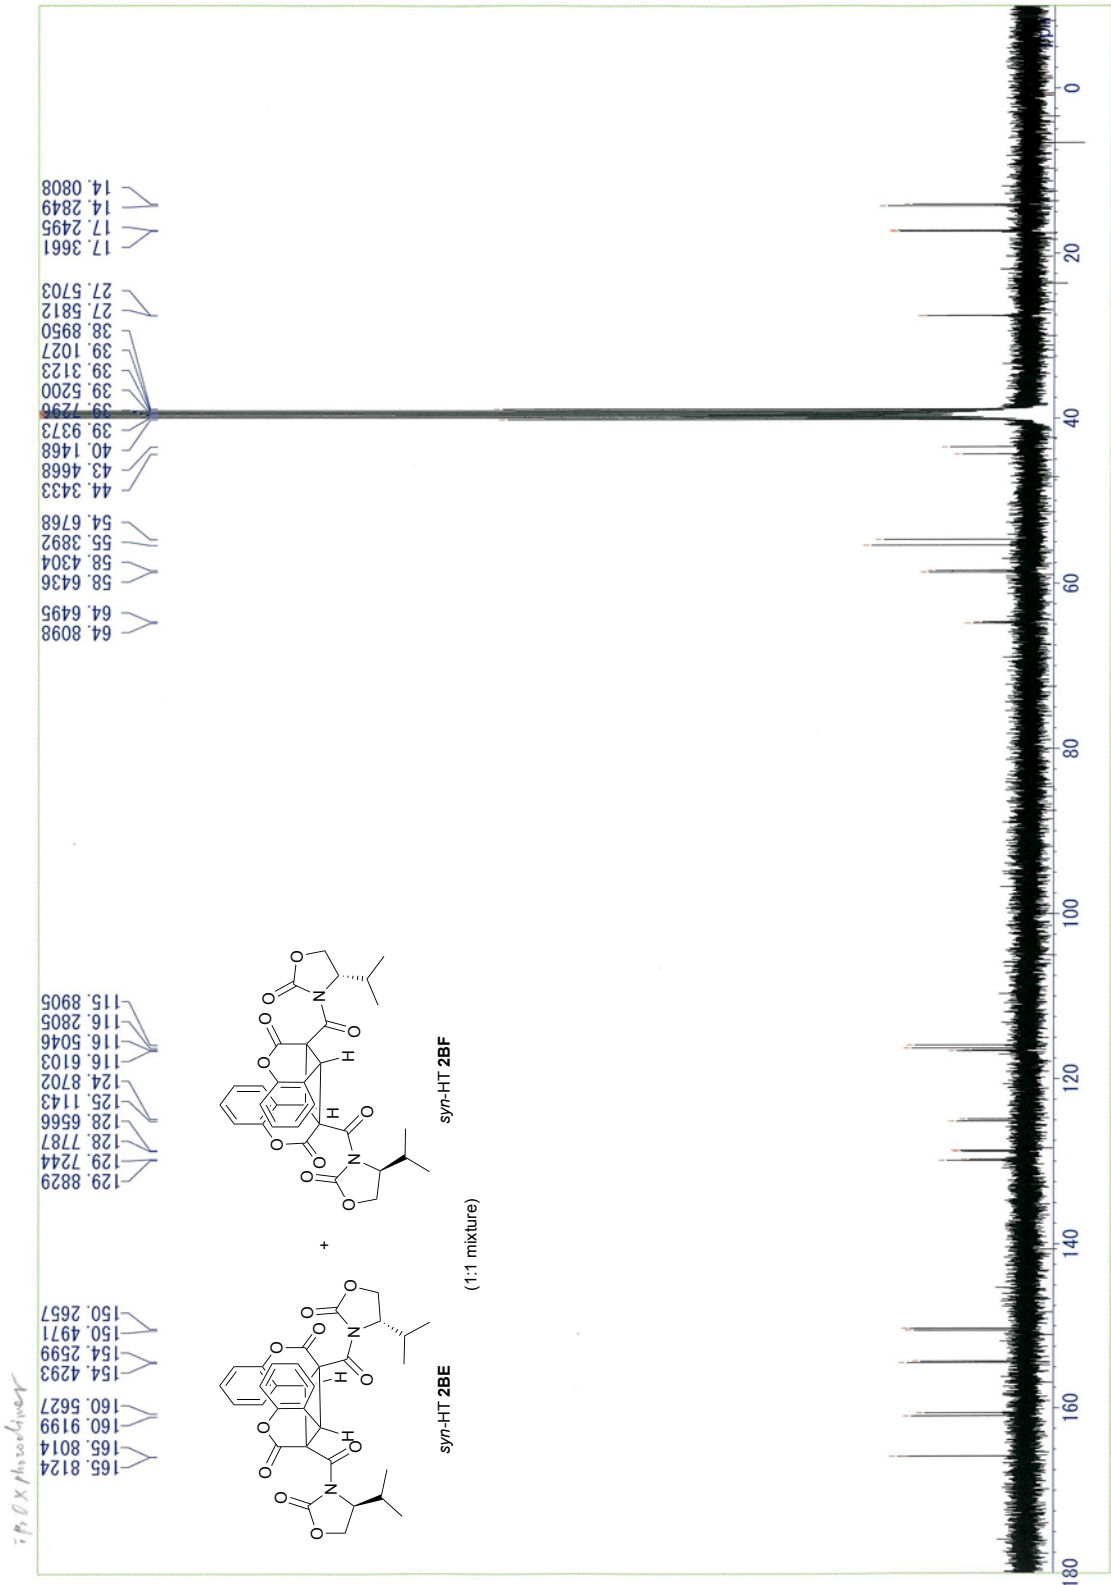

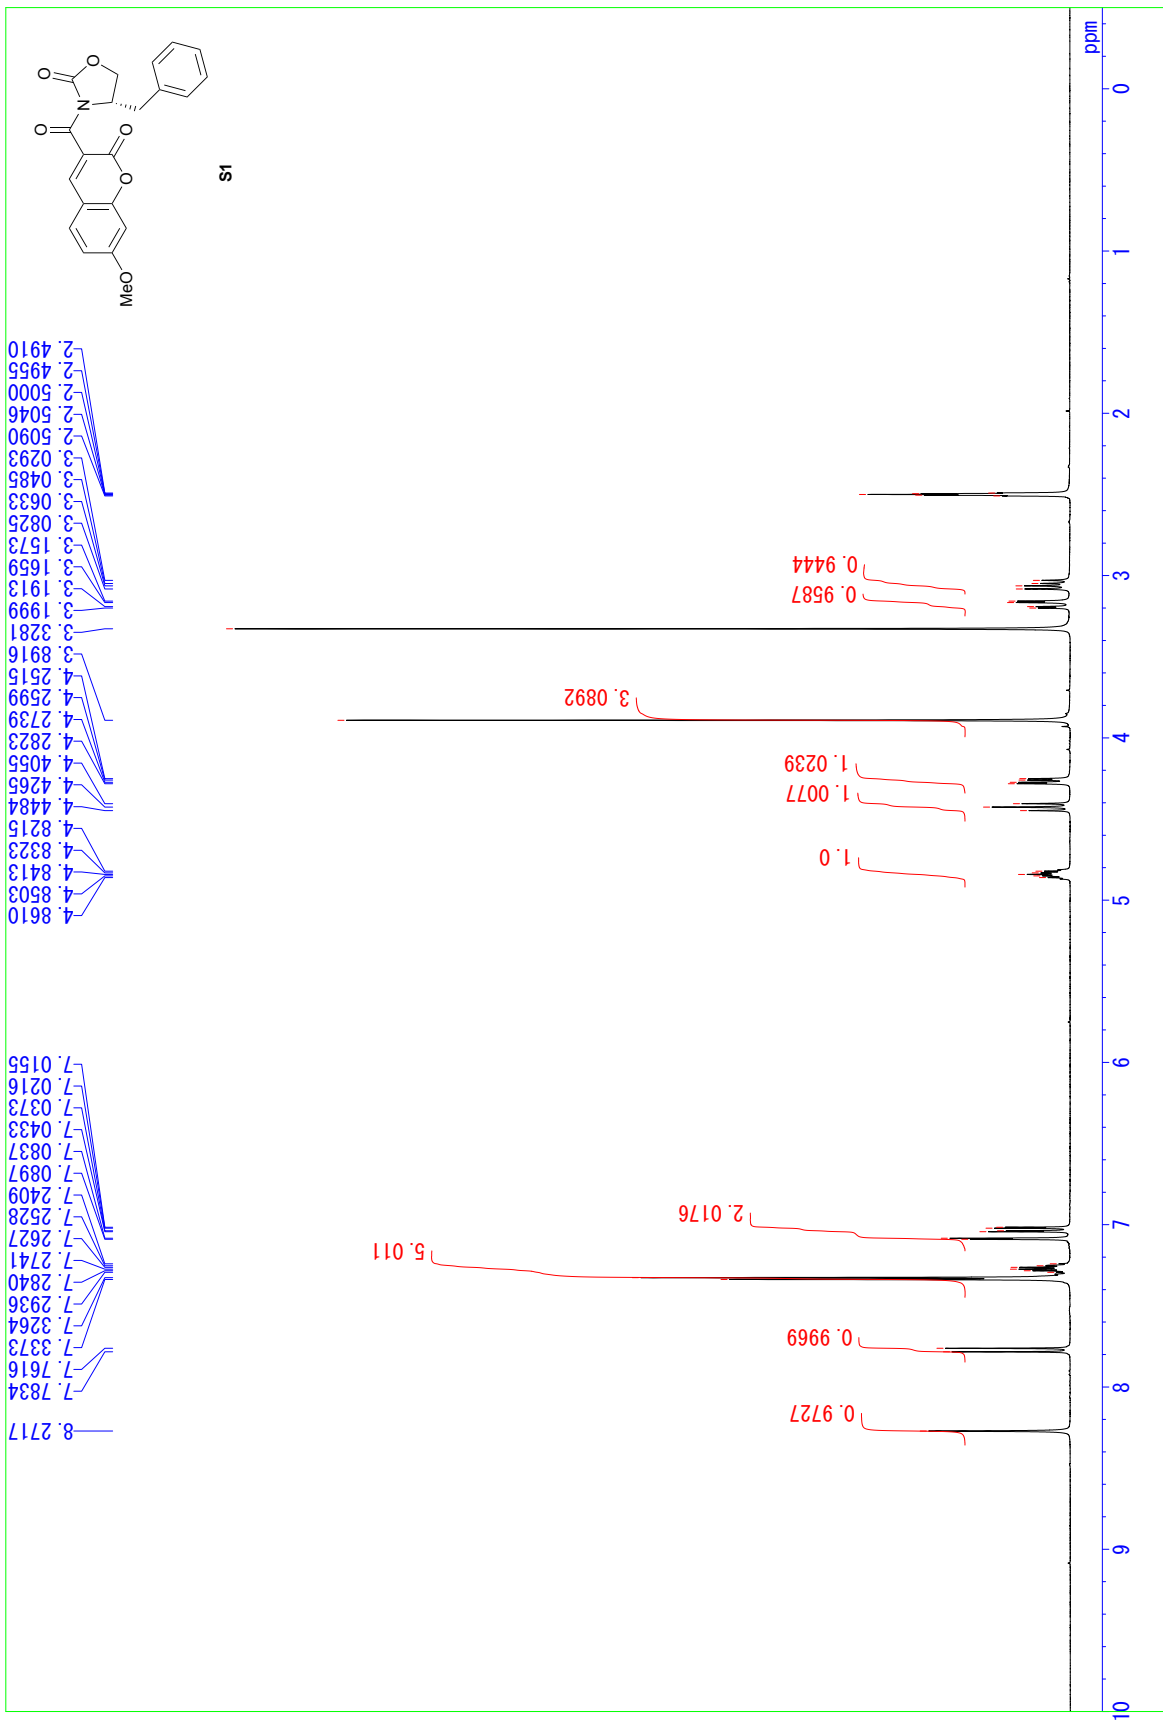

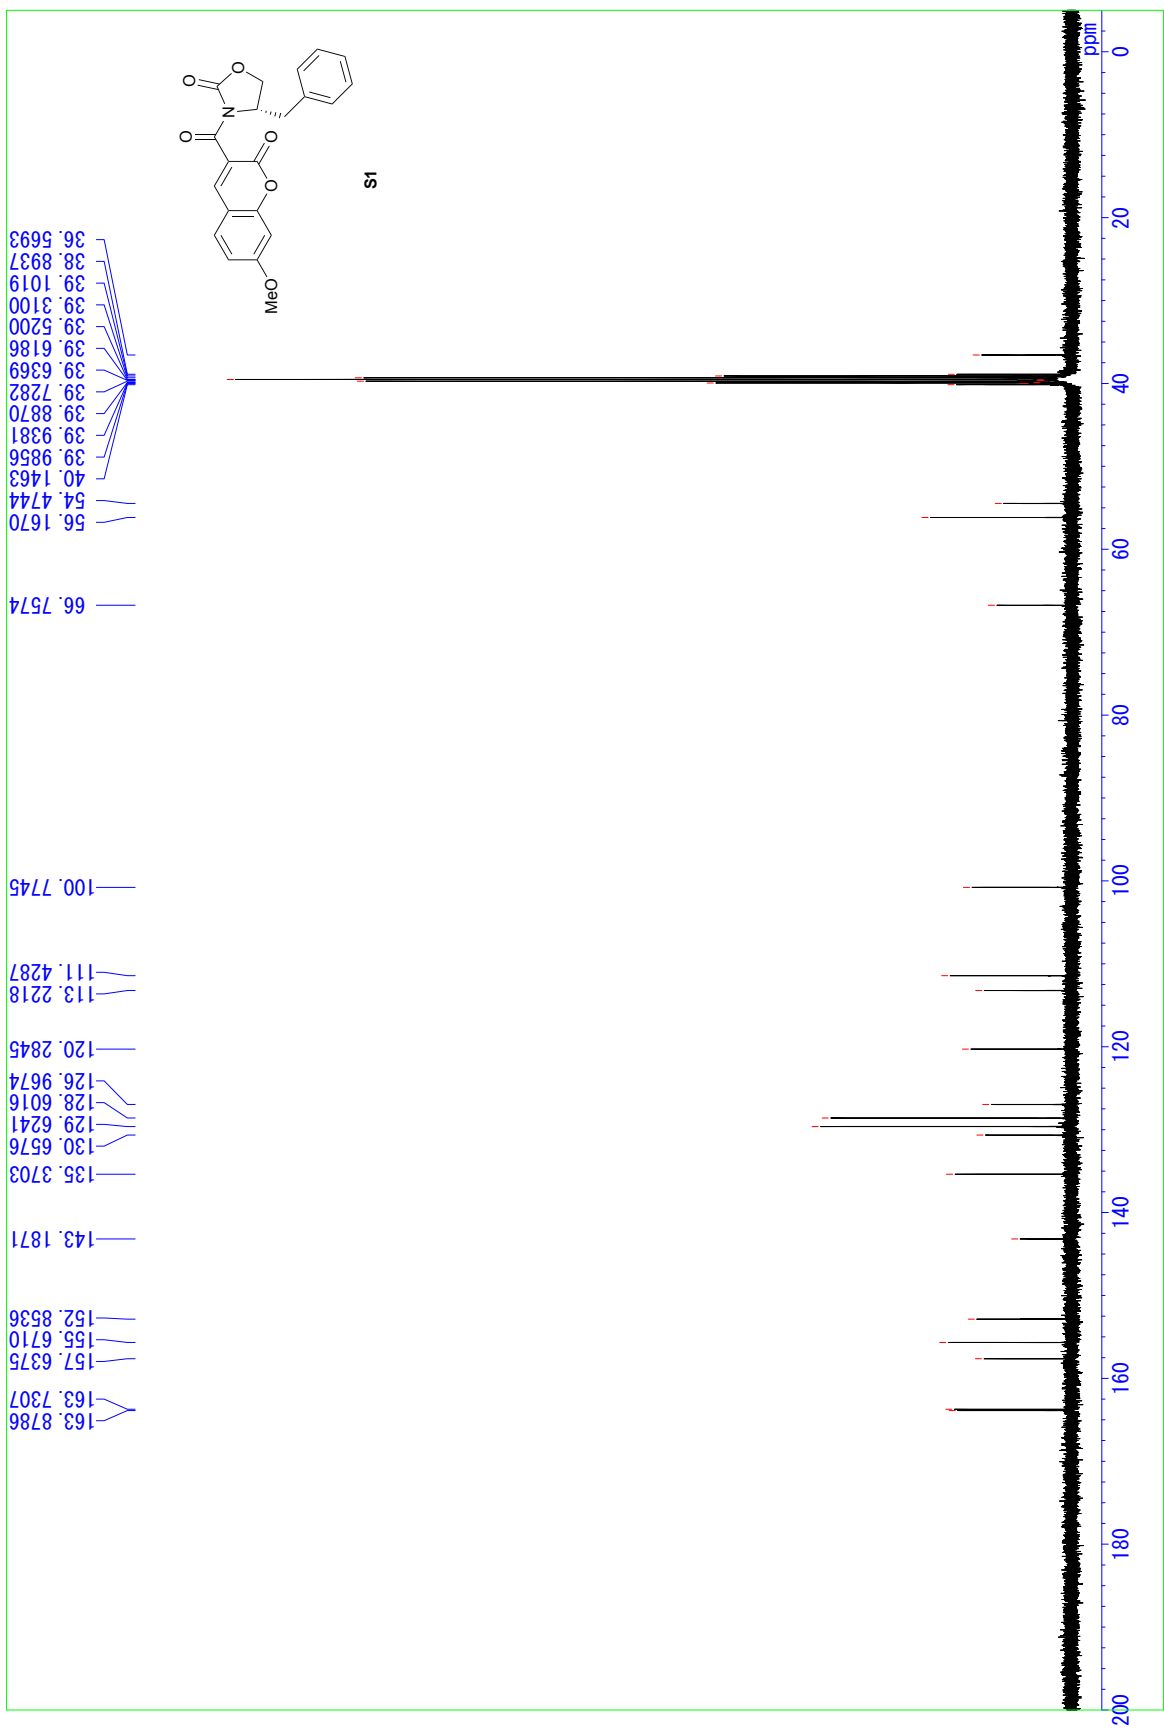



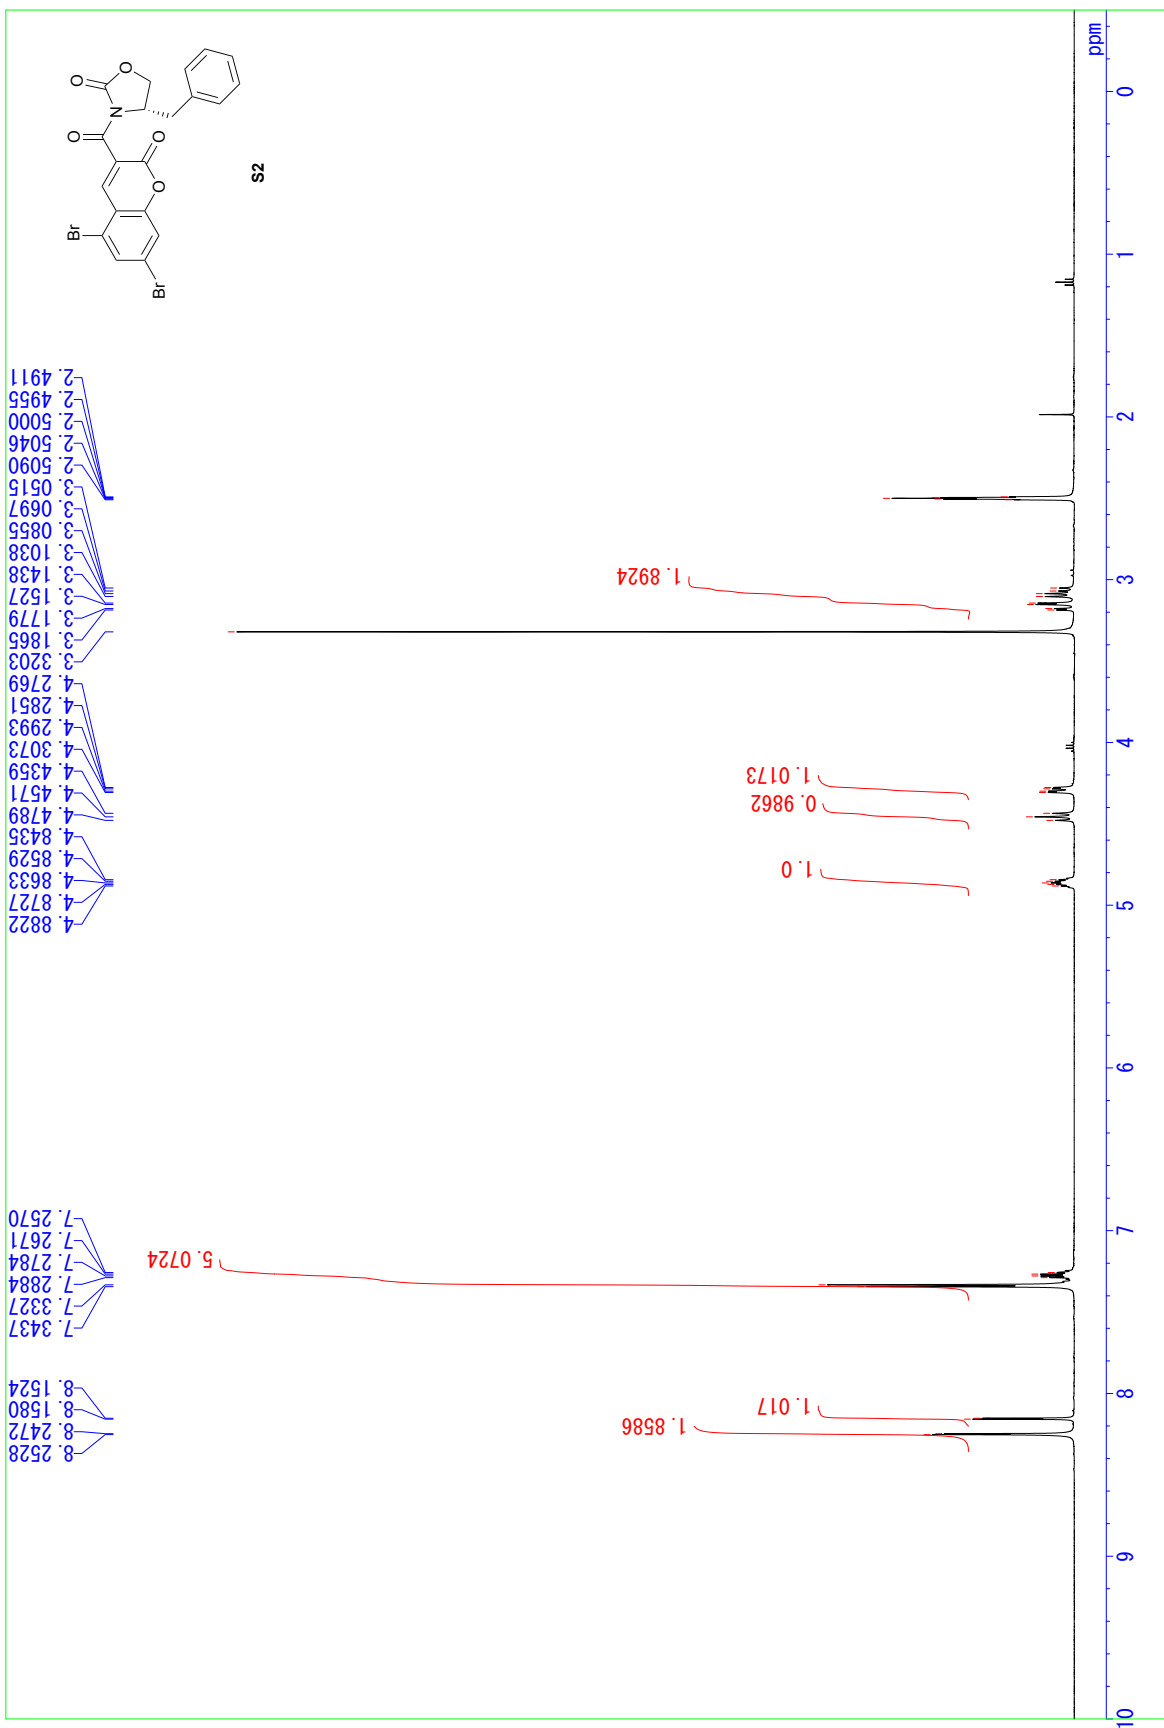

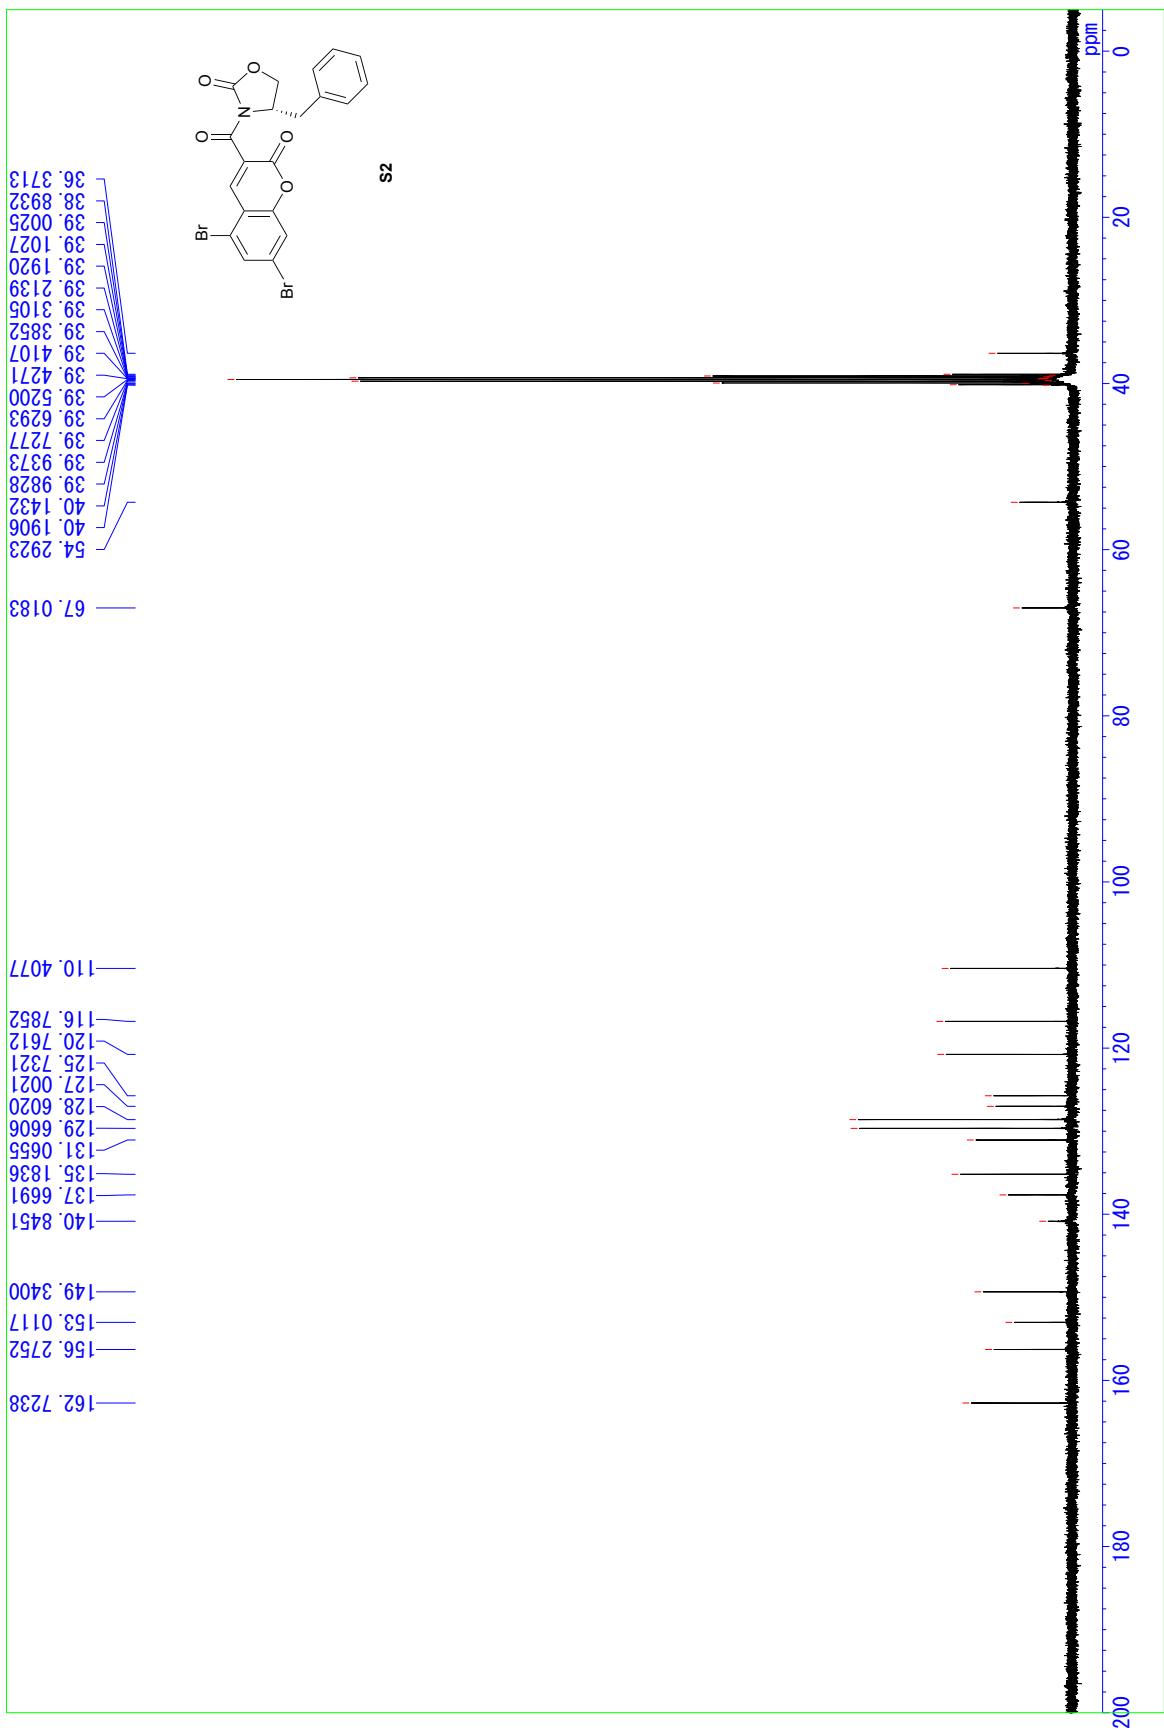



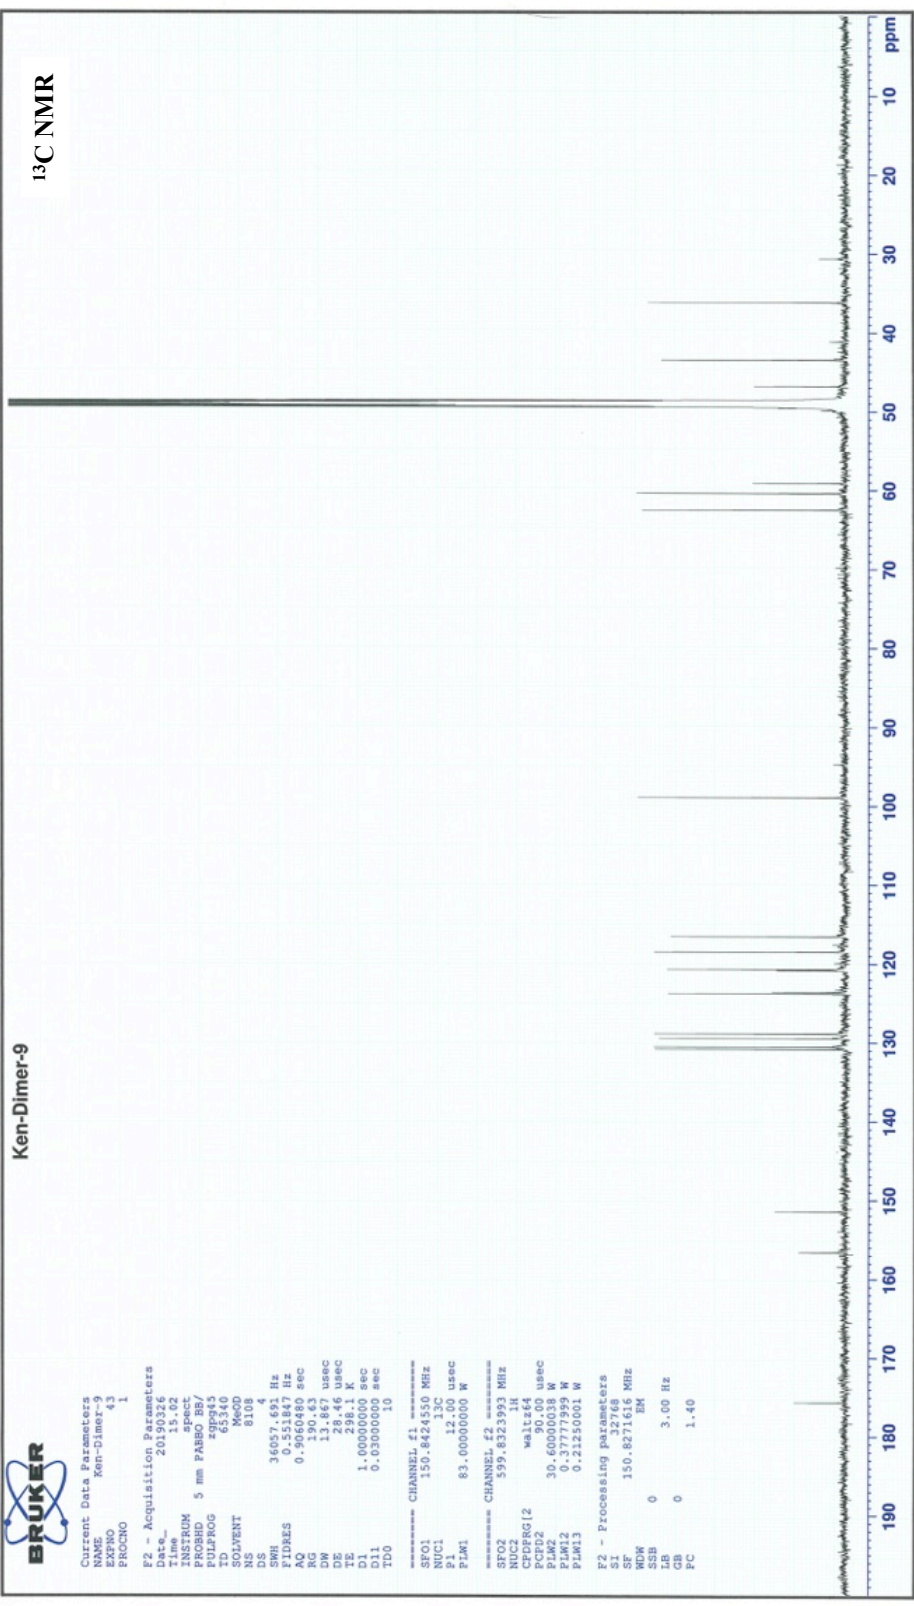

**13C NMR**

**Ken-Dimer-9**

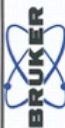

Current Data Parameters  
 NAME Ken-Dimer-9  
 EXPNO 43  
 PROCNO 1  
 F2 - Acquisition Parameters  
 Date\_ 20190326  
 Time 15.02  
 INSTRUM spect  
 PROBHD 5 mm PABBO BBI  
 PULPROG zgpg30  
 TD 65340  
 SOLVENT MeOD  
 NS 8108  
 DS 4  
 SWH 36057.693 Hz  
 FIDRES 0.551847 Hz  
 AQ 0.9060480 sec  
 RG 190.63  
 AG 190.63 usec  
 DE 28.66 usec  
 TE 298.1 K  
 D1 1.00000000 sec  
 D11 0.03000000 sec  
 TD0 10

\*\*\*\*\* CHANNEL f1 \*\*\*\*\*  
 SF01 150.8424550 MHz  
 NUCL1 13C  
 P1A1 12.00 usec  
 P1A1 83.00000000 W  
 \*\*\*\*\* CHANNEL f2 \*\*\*\*\*  
 SF02 599.6523938 MHz  
 NUCL2 1H  
 CPOPRG12 maltz64  
 PCPD2 90.00 usec  
 P1M2 30.60000038 W  
 P1M3 0.21250001 W  
 F2 - Processing parameters  
 SI 32768  
 WDW EM  
 SSB 0  
 GB 0  
 PC 1.40

\*\*\*\*\* OBSERVE \*\*\*\*\*  
 Nucleus \_\_\_\_\_ Freq \_\_\_\_\_ MHz  
 Spec Width \_\_\_\_\_ Hz Offset \_\_\_\_\_ Hz  
 Acq Time \_\_\_\_\_ sec Delay \_\_\_\_\_ sec  
 Pulse Width \_\_\_\_\_ usec Transmits \_\_\_\_\_  
 \*\*\*\*\* DECOUPLE \*\*\*\*\*  
 Nucleus \_\_\_\_\_ Mode \_\_\_\_\_  
 Modulation Mod \_\_\_\_\_ Power Mod \_\_\_\_\_  
 Pulse Width \_\_\_\_\_ usec  
 \*\*\*\*\* PLOT/PROCESSING \*\*\*\*\*  
 FN \_\_\_\_\_ K RE \_\_\_\_\_ sec CD \_\_\_\_\_ sec  
 LB \_\_\_\_\_ Hz AF \_\_\_\_\_ sec COD \_\_\_\_\_  
 Width \_\_\_\_\_ Hz/ppm Start \_\_\_\_\_ Hz/ppm  
 Reference \_\_\_\_\_  
 \*\*\*\*\* EXPERIMENT \*\*\*\*\*  
 Pulse Sequence \_\_\_\_\_  
 Tube O.D. \_\_\_\_\_ mm  
 Temp \_\_\_\_\_ °C  
 Solvent \_\_\_\_\_

\*\*\*\*\* SAMPLE \*\*\*\*\*  
 Number \_\_\_\_\_  
 File \_\_\_\_\_  
 Date \_\_\_\_\_  
 XL \_\_\_\_\_

NO 997259J

*Sato*





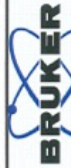

Ken-Dimer-9  
HSQC

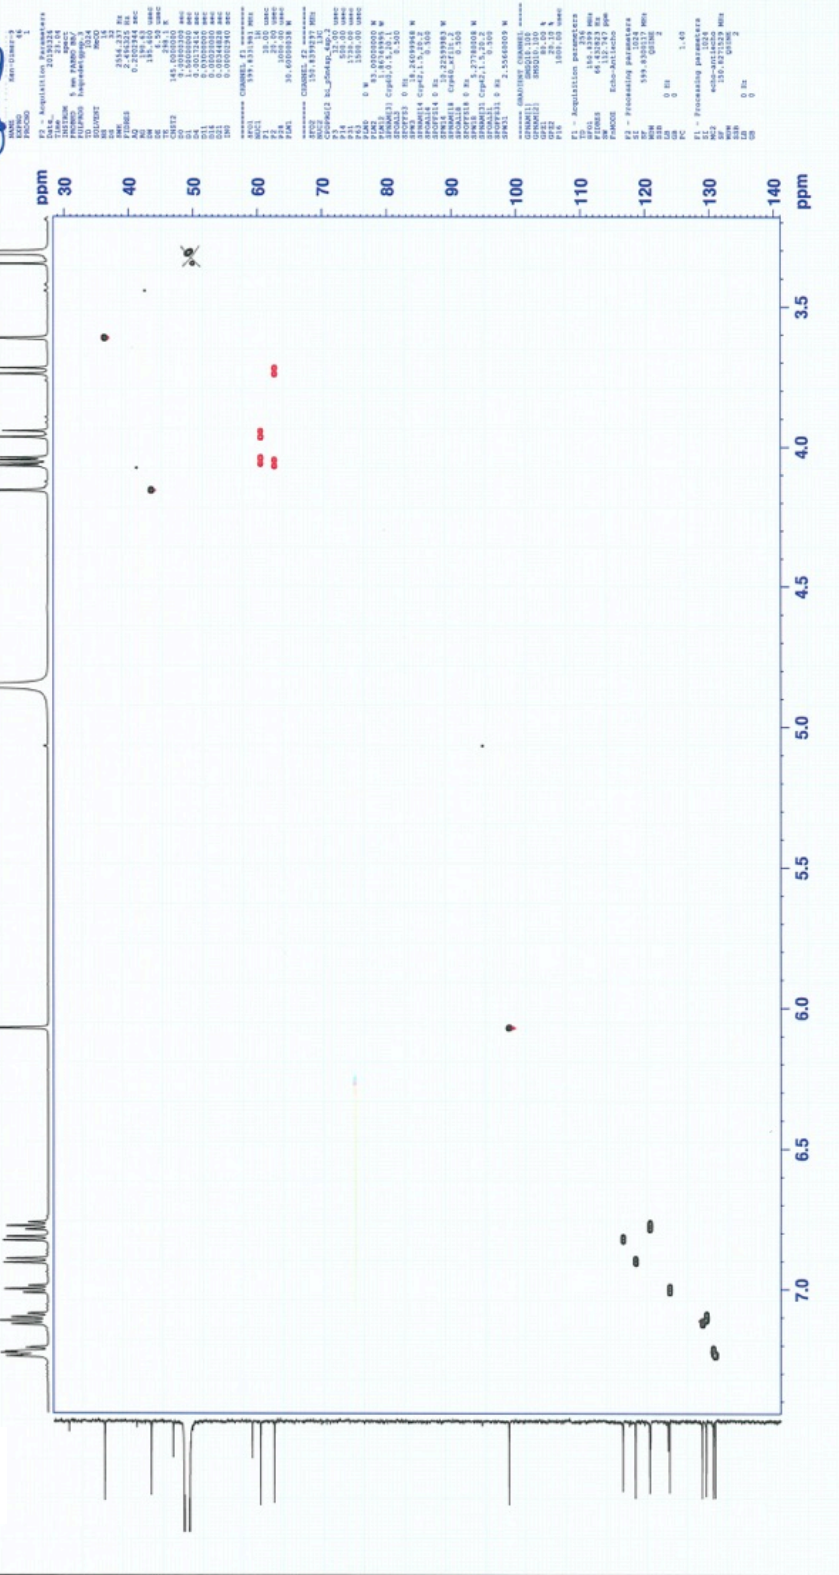

Number \_\_\_\_\_  
 File \_\_\_\_\_  
 Date: \_\_\_\_\_  
 XL: *Lato*

Tube SQ: \_\_\_\_\_  
 Tube OD: \_\_\_\_\_ mm  
 Temp: \_\_\_\_\_ °C  
 Solvent: \_\_\_\_\_

EXPERIMENT

FN: \_\_\_\_\_ K RE: \_\_\_\_\_ sec CD: \_\_\_\_\_ sec  
 LB: \_\_\_\_\_ Hz AF: \_\_\_\_\_ sec CCD: \_\_\_\_\_  
 Width: \_\_\_\_\_ Hz/ppm Start: \_\_\_\_\_ Hz/ppm  
 Reference: \_\_\_\_\_

PLOT/PROCESSING

Nucleus: \_\_\_\_\_ MHz  
 Mode: \_\_\_\_\_ dB  
 Modulation Mode: \_\_\_\_\_ Hz  
 Pulse Width: \_\_\_\_\_ µsec Power Mode: \_\_\_\_\_

DECOUPLE

Spec. Width: \_\_\_\_\_ Hz  
 Acq. Time: \_\_\_\_\_ sec  
 Delay: \_\_\_\_\_ sec  
 Transients: \_\_\_\_\_

OBSERVE

NO 897259J





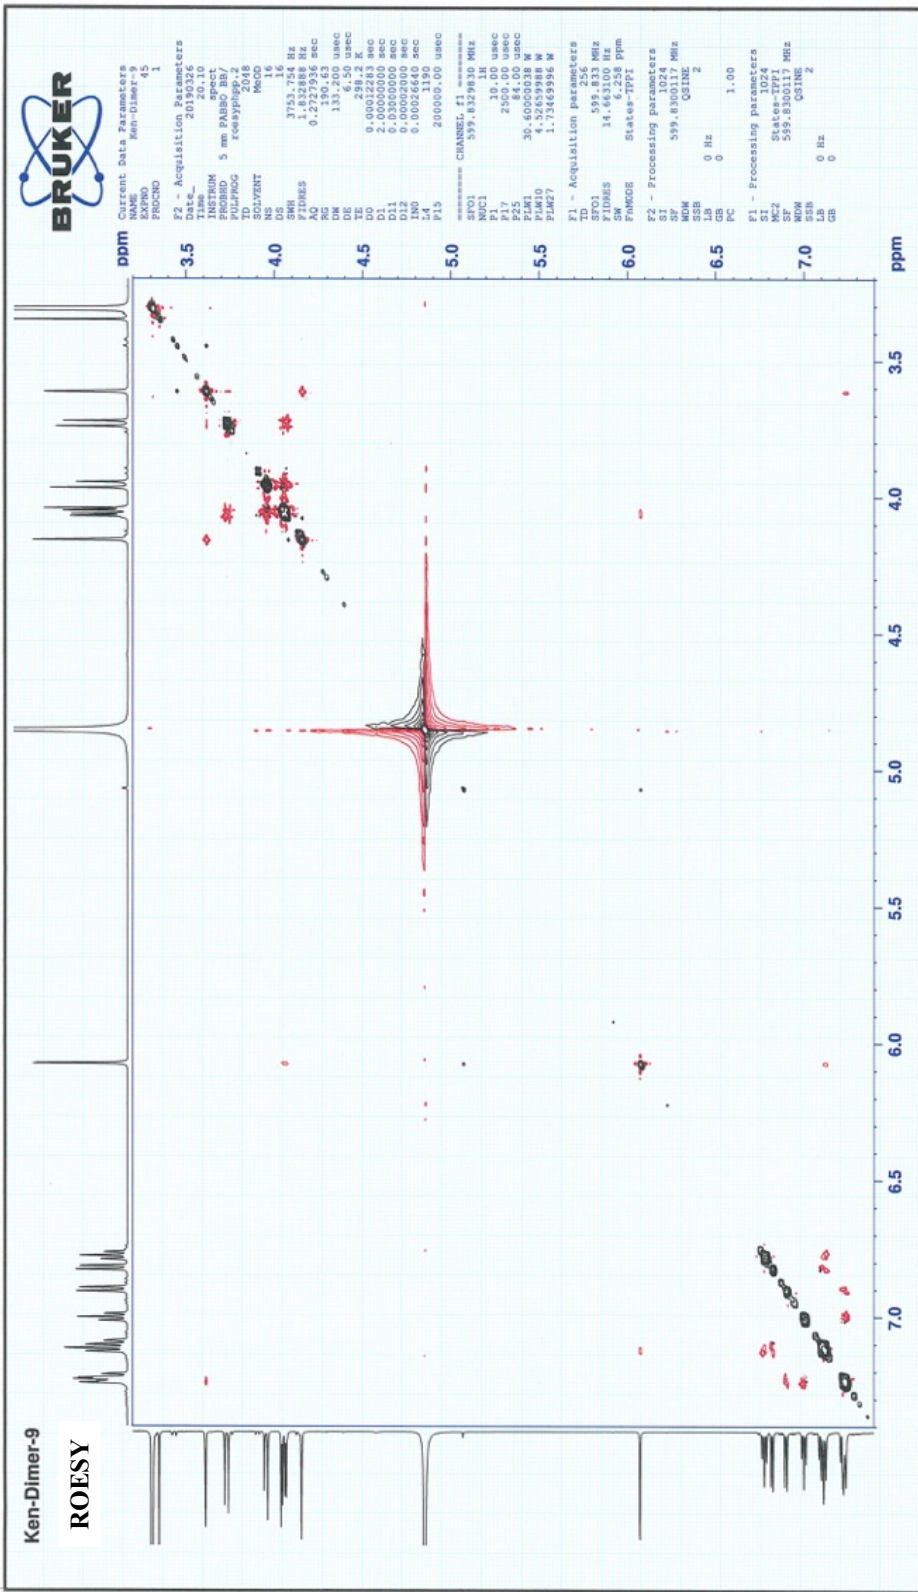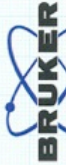

Current Data Parameters  
 EXPNO 45  
 PROCNO 1  
 F2 - Acquisition Parameters  
 Date\_ 20190326  
 Time\_ 10:00:00  
 INSTRUM spect  
 PROBHD 5 mm PABBO BB7  
 TD 65536  
 ID 191903260048  
 SOLVENT water  
 NS 16  
 DS 16  
 SHR 3753.754 Hz  
 FIDRES 1.832886 Hz  
 RG 0.2150463 SEC  
 DM 133.200 uMHC  
 DE 6.52 SEC  
 TE 299.2 K  
 D0 0.00012283 sec  
 D1 2.00000000 sec  
 D11 0.00000000 sec  
 D12 0.00000000 sec  
 INO 0.00026640 sec  
 P1 2000000.00 uMHC  
 P15 2000000.00 uMHC  
 ===== CHANNEL f1 =====  
 SFO1 599.8124830 MHz  
 NUC1 1H  
 P1 10.00 uMHC  
 PL1 25.00 dB  
 F2 25.00 MHz  
 F25 84.00 uMHC  
 PLW1 30.60000000 W  
 PLW2 30.60000000 W  
 PLM27 1.25669996 W  
 T1 - Acquisition parameters  
 T1 599.833 MHz  
 FIDRES 14.63100 Hz  
 SFO2 599.833 MHz  
 F2 599.833 MHz  
 FWHOS States-TPP2 ppm  
 F2 - Processing parameters  
 SF 599.8300117 MHz  
 MDW 0 Hz  
 SFO 599.8300117 MHz  
 LB 0 Hz  
 GB 0 Hz  
 PC 1.00  
 F1 - Processing parameters  
 SF 599.8300117 MHz  
 MDW 0 Hz  
 SFO 599.8300117 MHz  
 LB 0 Hz  
 GB 0 Hz

Number \_\_\_\_\_  
 File \_\_\_\_\_  
 Date \_\_\_\_\_  
 XL \_\_\_\_\_

NO 997259J

EXPERIMENT  
 Pulse Sequence \_\_\_\_\_  
 Tube CD \_\_\_\_\_ mm  
 Temp \_\_\_\_\_ °C  
 Solvent \_\_\_\_\_

PLOT/PROCESSING  
 FN \_\_\_\_\_ K RE \_\_\_\_\_ sec CD \_\_\_\_\_ sec  
 LB \_\_\_\_\_ Hz AF \_\_\_\_\_ sec CD \_\_\_\_\_  
 With \_\_\_\_\_ Hz/ppm Start \_\_\_\_\_ Hz/ppm  
 Reference \_\_\_\_\_

DECOUPLE  
 Nucleus \_\_\_\_\_ MHz  
 Mode \_\_\_\_\_ dB  
 Modulation Mode \_\_\_\_\_ Hz  
 Pulse Width \_\_\_\_\_ µsec Power Mode \_\_\_\_\_

OBSERVE  
 Nucleus \_\_\_\_\_ Hz  
 Spec Width \_\_\_\_\_ Hz  
 Acq Time \_\_\_\_\_ sec  
 Pulse Width \_\_\_\_\_ µsec  
 Freq \_\_\_\_\_ MHz  
 Offset \_\_\_\_\_ Hz  
 Delay \_\_\_\_\_ sec  
 Transients \_\_\_\_\_



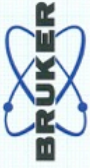

Ken-Dimer-9  
ROESY

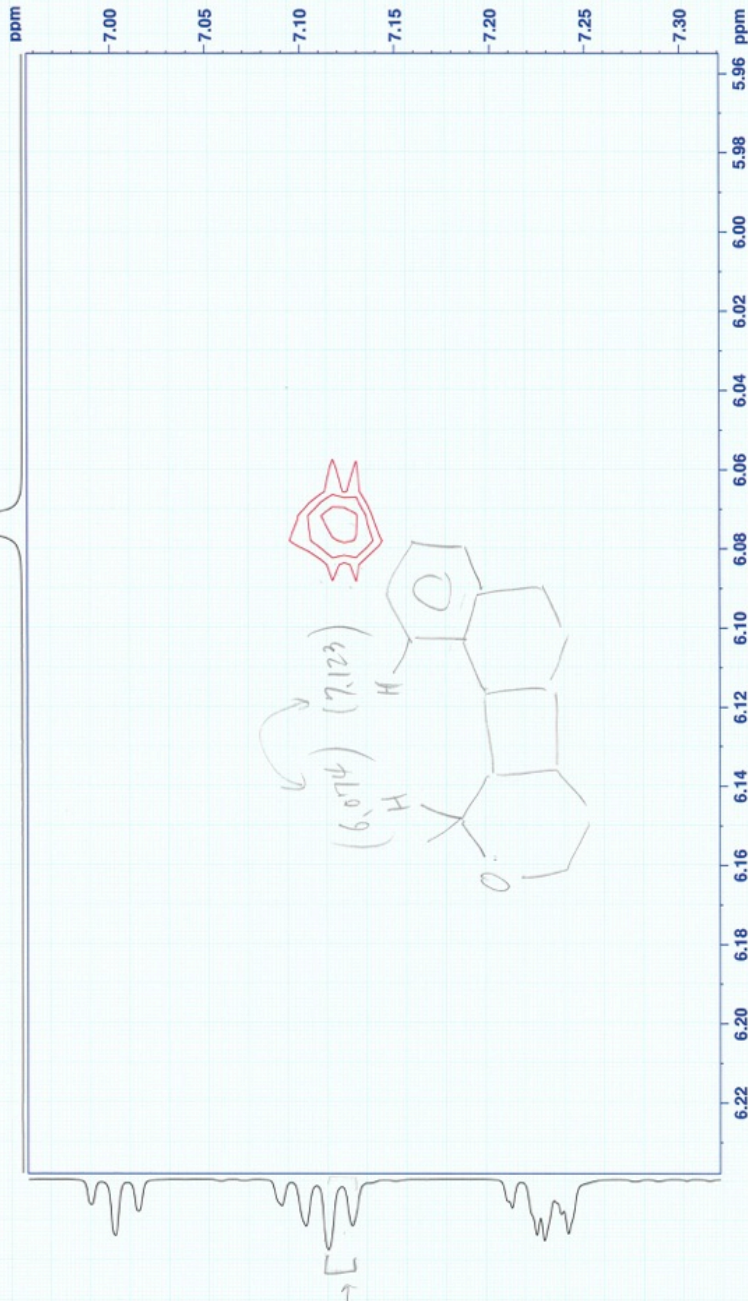

Current Data Parameters  
 NAME Ken-Dimer-9  
 EXPNO 4  
 PROCNO 1  
 F2 - Acquisition Parameters  
 Date\_ 20180711  
 Time 20:10  
 INSTRUM spect  
 PULPROG zgpg30  
 TD 2048  
 SFO1 500.136261 MHz  
 SOLVENT H<sub>2</sub>O  
 NS 16  
 DS 1.6  
 SWH 3751.784 Hz  
 AQ 0.2727936 sec  
 RG 150.63  
 DE 13.71  
 DB 6.30 usec  
 TE 298.2 K  
 FIDRES 0.0000000 sec  
 D1 2.0000000 sec  
 D11 0.0300000 sec  
 D12 0.0002000 sec  
 LA 0.0000000 sec  
 L4 1190 sec  
 P15 200000.00 usec  
 ===== CHANNEL f1 =====  
 SFO1 500.136261 MHz  
 P1 10.00 usec  
 P17 2000.00 usec  
 P23 80.00 usec  
 PL140 4.3265998 W  
 PL142 1.7346996 W  
 F1 - Acquisition parameters  
 TD 65536  
 SFO2 500.136261 MHz  
 FIDRES 0.0000000 sec  
 SW 6.258 PPM  
 FNUC2E States-TFPI  
 F2 - Processing parameters  
 SI 1024  
 SF 999.8301024 MHz  
 WDW EM  
 GB 0 Hz  
 PC 1.00  
 F1 - Processing parameters  
 SI 1024  
 SF 999.8301024 MHz  
 WDW EM  
 GB 0 Hz  
 PC 1.00

Number \_\_\_\_\_  
 File \_\_\_\_\_  
 Dir \_\_\_\_\_  
 XL \_\_\_\_\_

NO 9972591

EXPERIMENT  
 Pulse Sequence \_\_\_\_\_  
 Tube ID \_\_\_\_\_ mm  
 Temp \_\_\_\_\_ °C  
 Solvent \_\_\_\_\_

PLOT/PROCESSING  
 FN \_\_\_\_\_ K RE \_\_\_\_\_ sec CD \_\_\_\_\_ sec  
 LB \_\_\_\_\_ Hz AF \_\_\_\_\_ sec CCD \_\_\_\_\_  
 Width \_\_\_\_\_ Hz ppm Start \_\_\_\_\_ Hz/gram  
 Reference \_\_\_\_\_

DECOUPLE  
 Nucleus \_\_\_\_\_ MHz  
 Mode \_\_\_\_\_ Hz  
 Modulation Mode \_\_\_\_\_ Hz  
 Pulse Width \_\_\_\_\_ usec Power Mode \_\_\_\_\_

OBSERVE  
 Nucleus \_\_\_\_\_ Hz  
 Spec. Width \_\_\_\_\_ Hz  
 Acq. Time \_\_\_\_\_ sec  
 Pulse Width \_\_\_\_\_ usec  
 Delay \_\_\_\_\_ sec  
 Transients \_\_\_\_\_

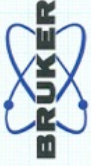

Ken-Dimer-9  
ROESY

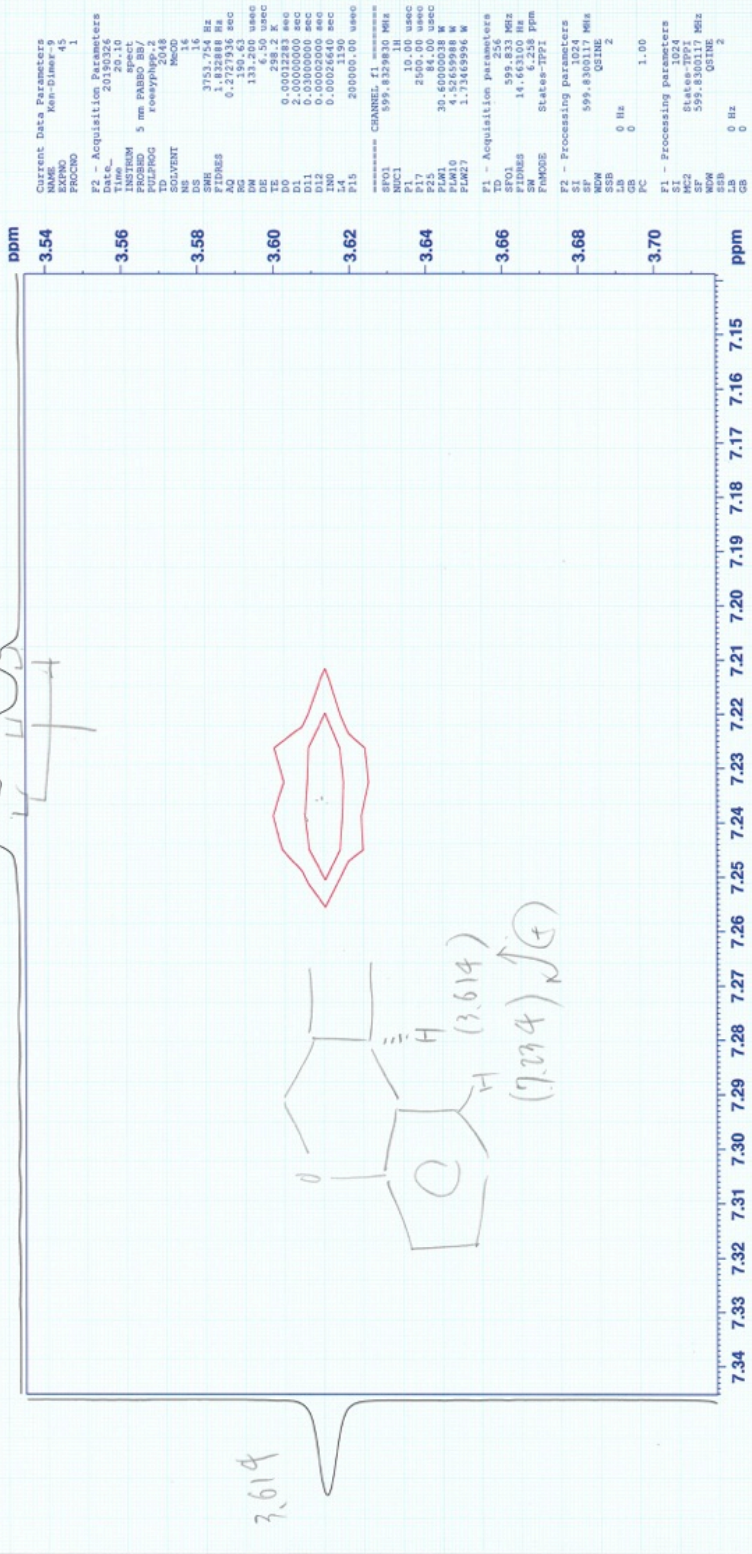

Number \_\_\_\_\_  
 File \_\_\_\_\_  
 Date \_\_\_\_\_  
 XL \_\_\_\_\_

SAMPLE \_\_\_\_\_  
 Pulse Sequence \_\_\_\_\_  
 Tube O.D. \_\_\_\_\_ mm  
 Temp. \_\_\_\_\_ °C  
 Solvent \_\_\_\_\_

EXPERIMENT  
 FN \_\_\_\_\_ K RE \_\_\_\_\_ sec CD \_\_\_\_\_ sec  
 LB \_\_\_\_\_ Hr AF \_\_\_\_\_ sec CCD \_\_\_\_\_  
 Width \_\_\_\_\_ Hr (gym) Start \_\_\_\_\_ Hr (gym)  
 Reference \_\_\_\_\_

PLOT PROCESSING  
 Nucleus \_\_\_\_\_ Hz  
 Mode \_\_\_\_\_ dB  
 Modulation Mode \_\_\_\_\_ Hz  
 Pulse Width \_\_\_\_\_ usec  
 Power Mode \_\_\_\_\_  
 Offset \_\_\_\_\_ Hz  
 Power \_\_\_\_\_ dB  
 Freq. \_\_\_\_\_ Hz  
 Power Mode \_\_\_\_\_

RECORDED  
 Nucleus \_\_\_\_\_ MHz  
 Spec. Width \_\_\_\_\_ Hz  
 Acq. Time \_\_\_\_\_ sec  
 Delay \_\_\_\_\_ sec  
 Transients \_\_\_\_\_

NO 997259J



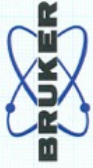

Ken-Dimer-9  
ROESY

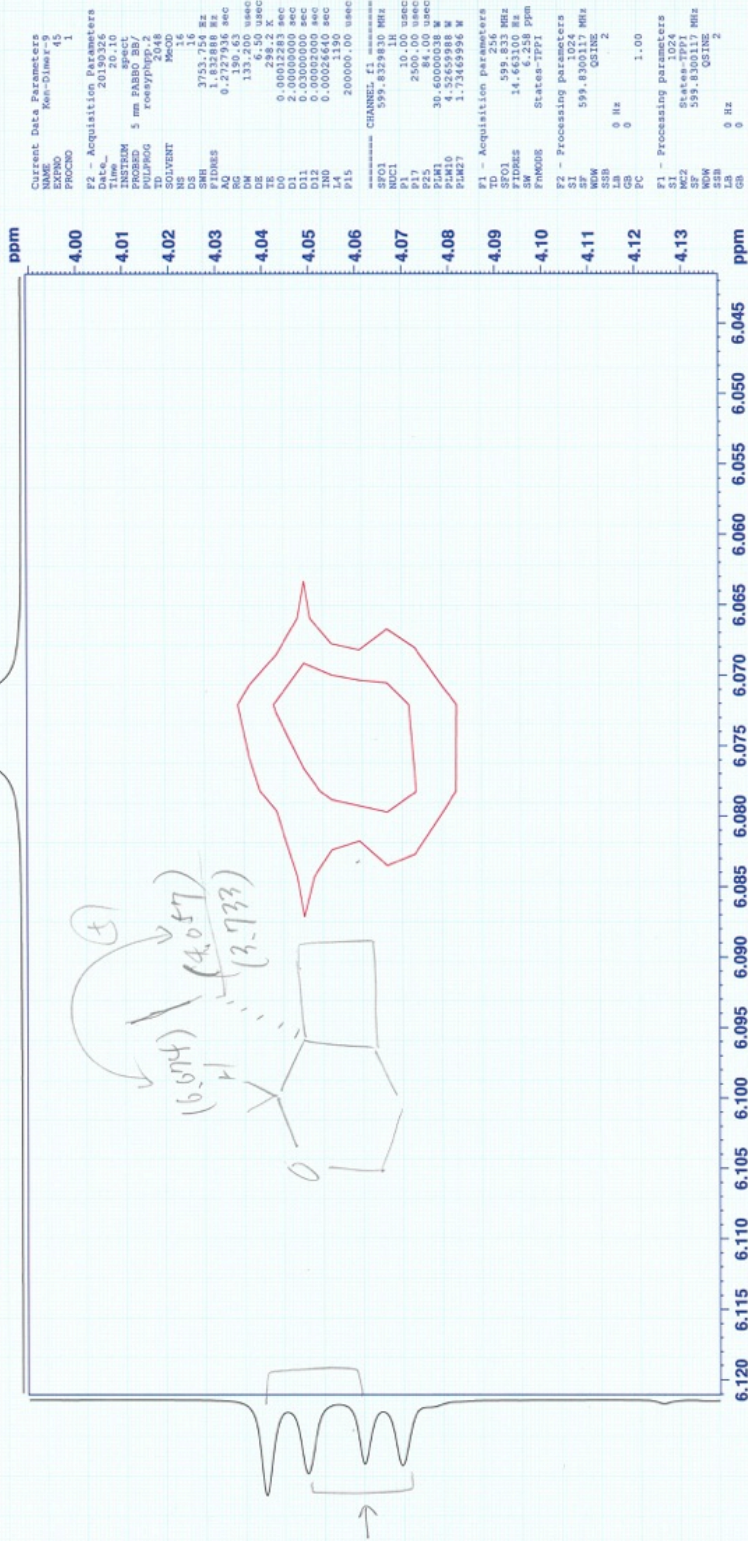

Current Data Parameters  
 NAME Ken-Dimer-9  
 PROCNO 1  
 F2 - Acquisition Parameters  
 Time 20.10  
 INSTRUM 5 mm BBAFSP01  
 PULPROG roesypprog2  
 TD 2048  
 NS 16  
 DS 1.6  
 SFR 3753.168 Hz  
 AQ 0.2727936 sec  
 RG 130.63 usec  
 DE 6.55 usec  
 TE 0.062982 K  
 D1 2.0000000 sec  
 D11 0.0300000 sec  
 D12 0.0002000 sec  
 L4 1190  
 P15 200000.00 usec  
 \*\*\*\*\* CHANNEL f1 \*\*\*\*\*  
 SFO1 599.8329830 MHz  
 P16 10.00 usec  
 P17 2500.00 usec  
 P18 10.00 usec  
 P19 30.4000000 sec  
 P1M10 4.52659888 M  
 P1M27 1.73469996 M  
 F1 - Acquisition parameters  
 TD 32768  
 SFO2 599.8329830 MHz  
 FIDRES 14.663100 Hz  
 SW 6.258 ppm  
 FWHM08 States-TFPI  
 F2 - Processing parameters  
 SI 1024  
 SFO 599.8329830 MHz  
 MSH 0 Hz  
 SSB 0 Hz  
 GB 0  
 PC 1.00  
 F1 - Processing parameters  
 SI 1024  
 SFO 599.8329830 MHz  
 MSH 0 Hz  
 SSB 0 Hz  
 GB 0

Number \_\_\_\_\_  
 File \_\_\_\_\_  
 Date \_\_\_\_\_  
 XL \_\_\_\_\_

**OBSERVE**  
 Nucleus \_\_\_\_\_ MHz  
 Spec. Width \_\_\_\_\_ Hz  
 Acq. Time \_\_\_\_\_ sec  
 Pulse Width \_\_\_\_\_  $\mu$ sec

**DECOUPLE**  
 Nucleus \_\_\_\_\_  
 Mode \_\_\_\_\_  
 Modulation: Mode \_\_\_\_\_  
 Pulse Width \_\_\_\_\_  $\mu$ sec  
 Power Mode \_\_\_\_\_

**LOT/PROCESSING**  
 FN \_\_\_\_\_ K RE \_\_\_\_\_ sec CD \_\_\_\_\_ sec  
 LB \_\_\_\_\_ Hz AF \_\_\_\_\_ sec CO \_\_\_\_\_  
 Width \_\_\_\_\_ Hz/gpm Start \_\_\_\_\_ Hz/gpm  
 Reference \_\_\_\_\_

**EXPERIMENT**  
 Pulse Sequence \_\_\_\_\_  
 Tube O.D. \_\_\_\_\_ mm  
 Temp. \_\_\_\_\_  $^{\circ}$ C  
 Solvent \_\_\_\_\_

**SAMPLE**

NO 997250J

<sup>1</sup>H NMR spectra of 1C and 1C-BF<sub>3</sub>·OEt<sub>2</sub> in C<sub>6</sub>D<sub>6</sub>

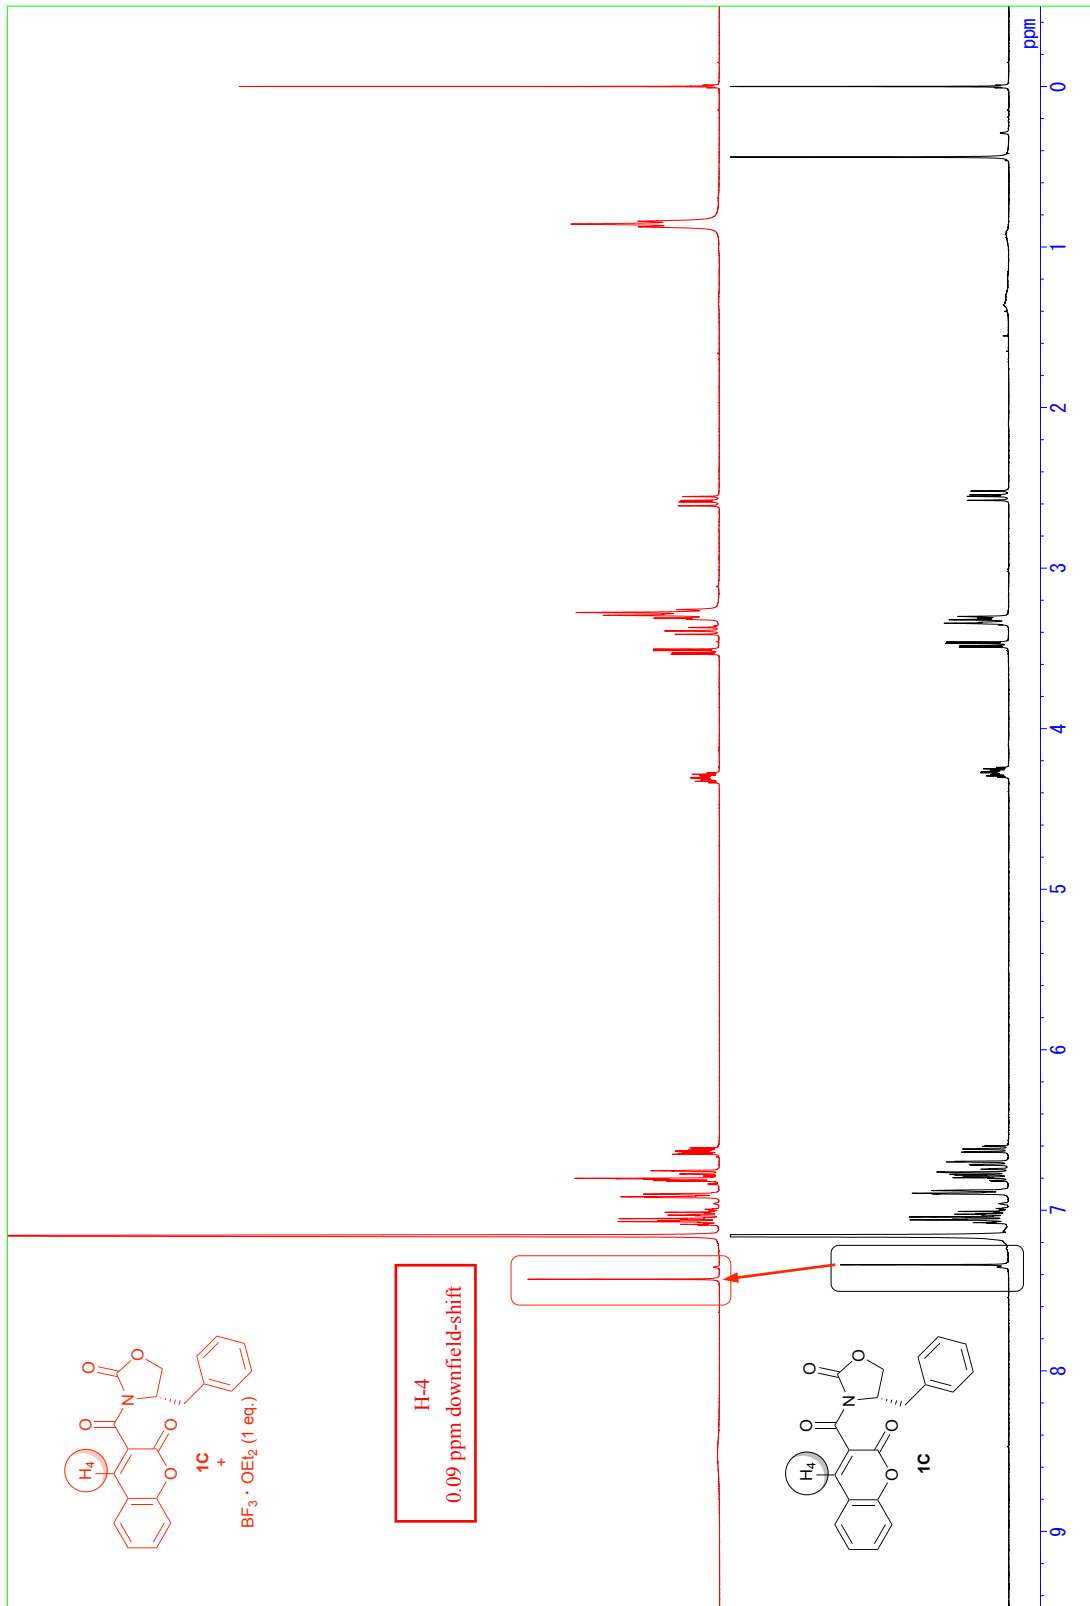

<sup>13</sup>C NMR spectra of 1C and 1C-BF<sub>3</sub>·OEt<sub>2</sub> in C<sub>6</sub>D<sub>6</sub>

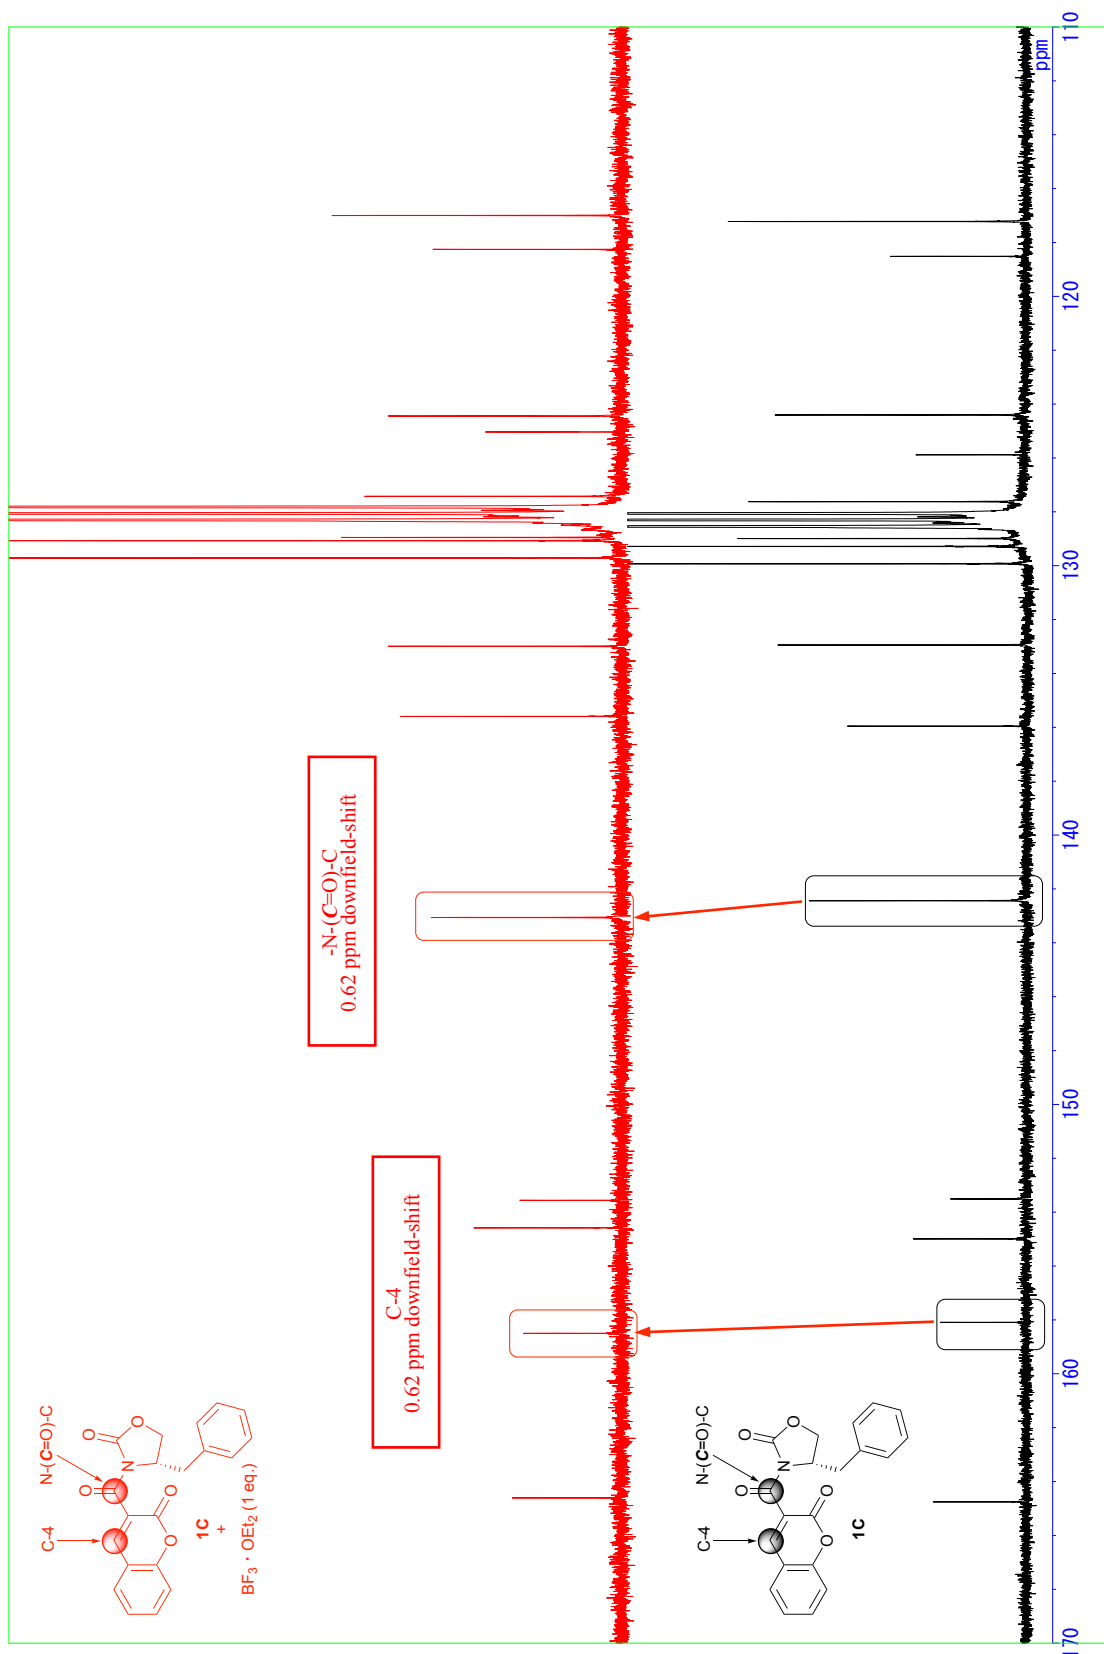

<sup>1</sup>H NMR spectra of 1C and 1C-Zn(ClO<sub>4</sub>)<sub>2</sub>·6H<sub>2</sub>O in (CD<sub>3</sub>)<sub>2</sub>CO

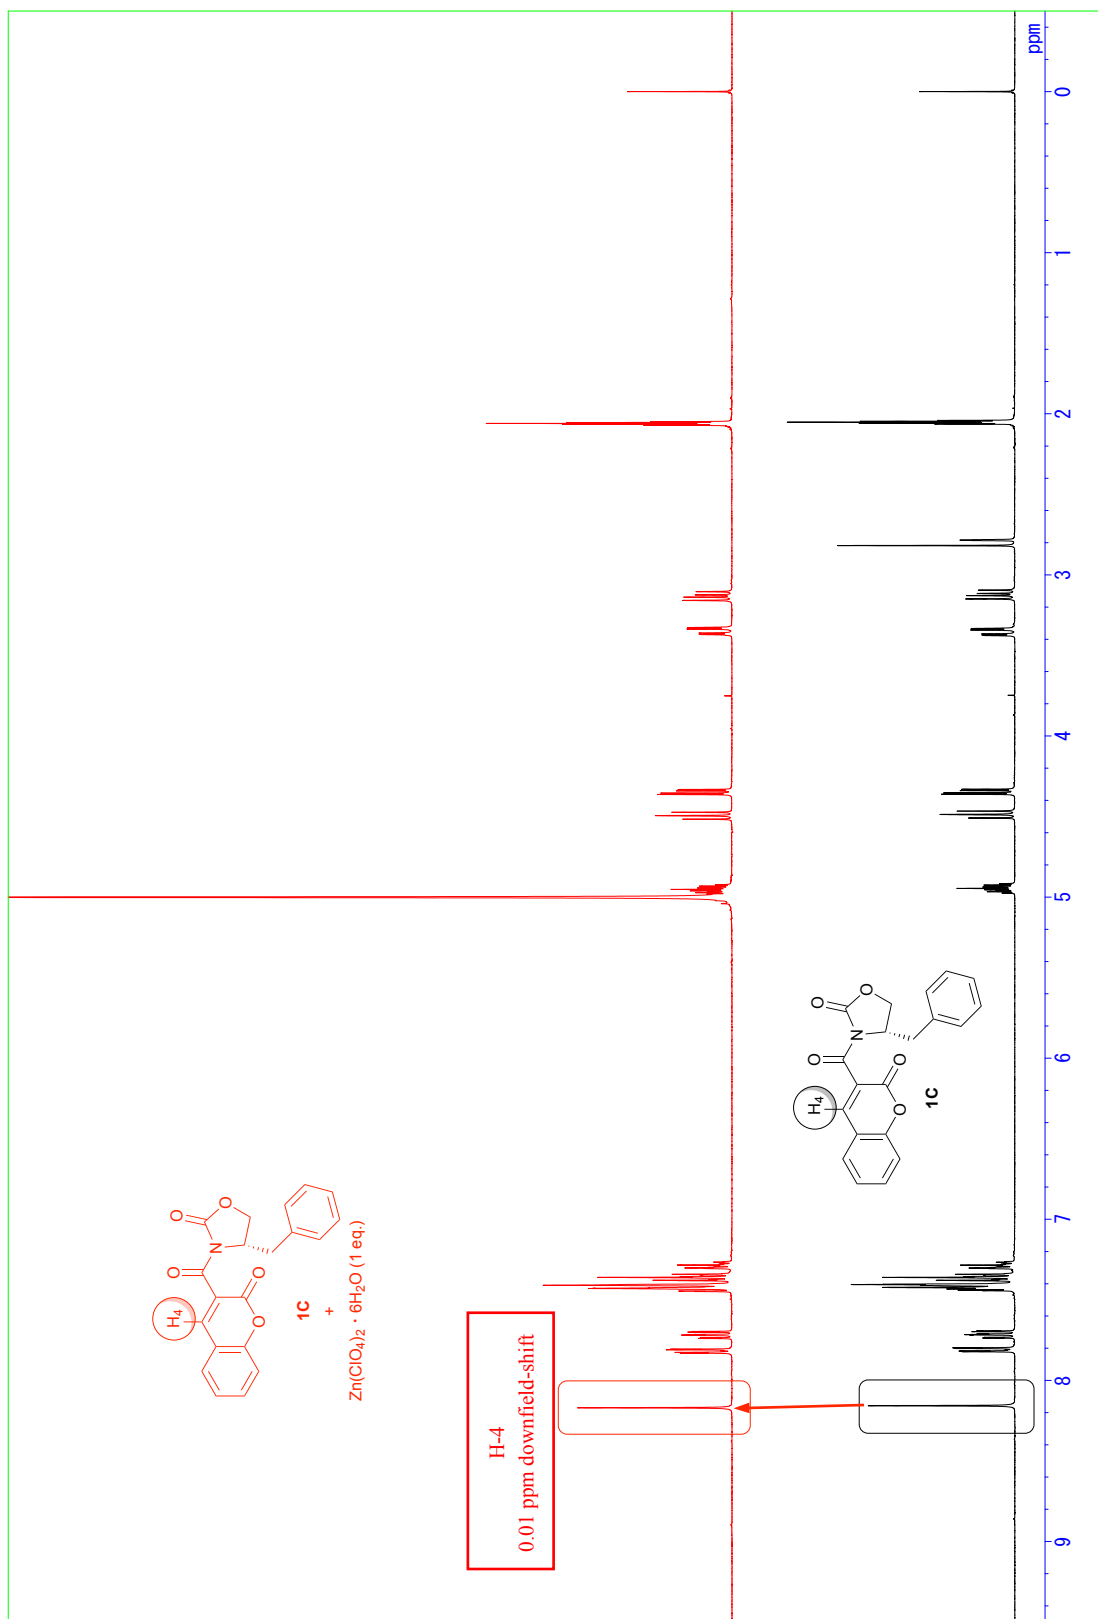

NMR spectra of 1C in C<sub>6</sub>D<sub>6</sub> (<sup>1</sup>H, <sup>13</sup>C, DEPT, 1D NOE, ROESY, COSY, HSQC, HMBC)

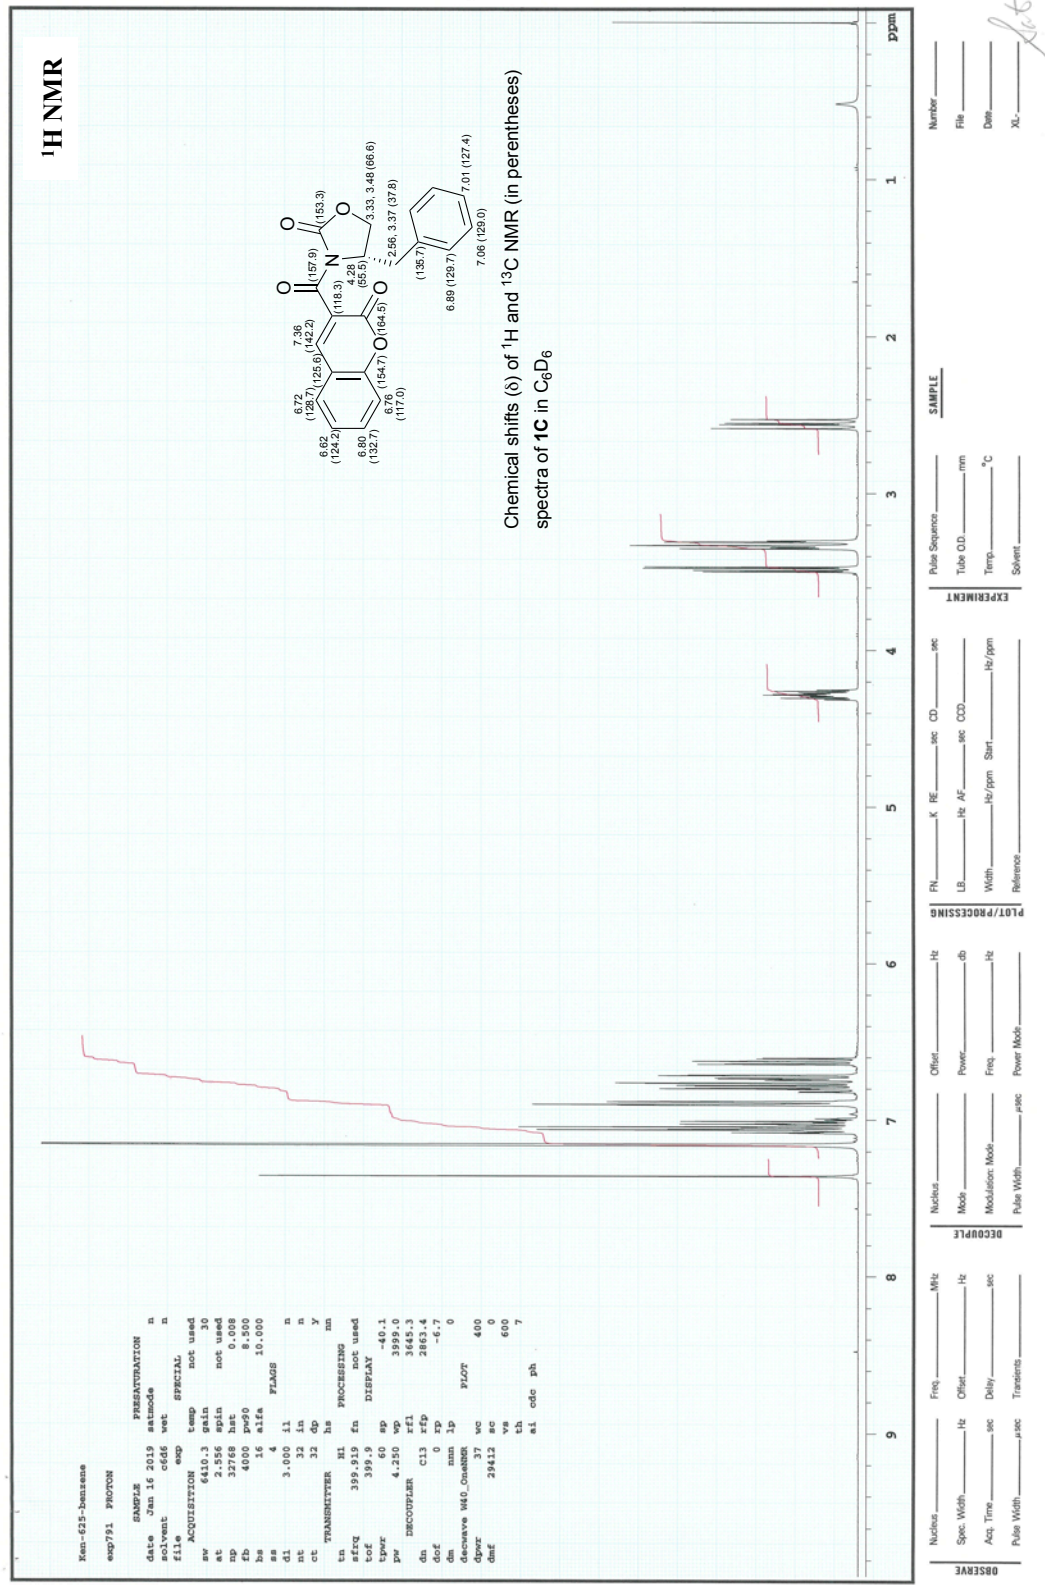

<sup>1</sup>H NMR

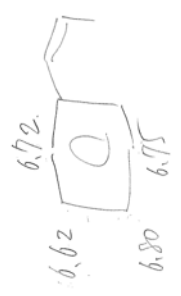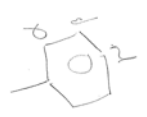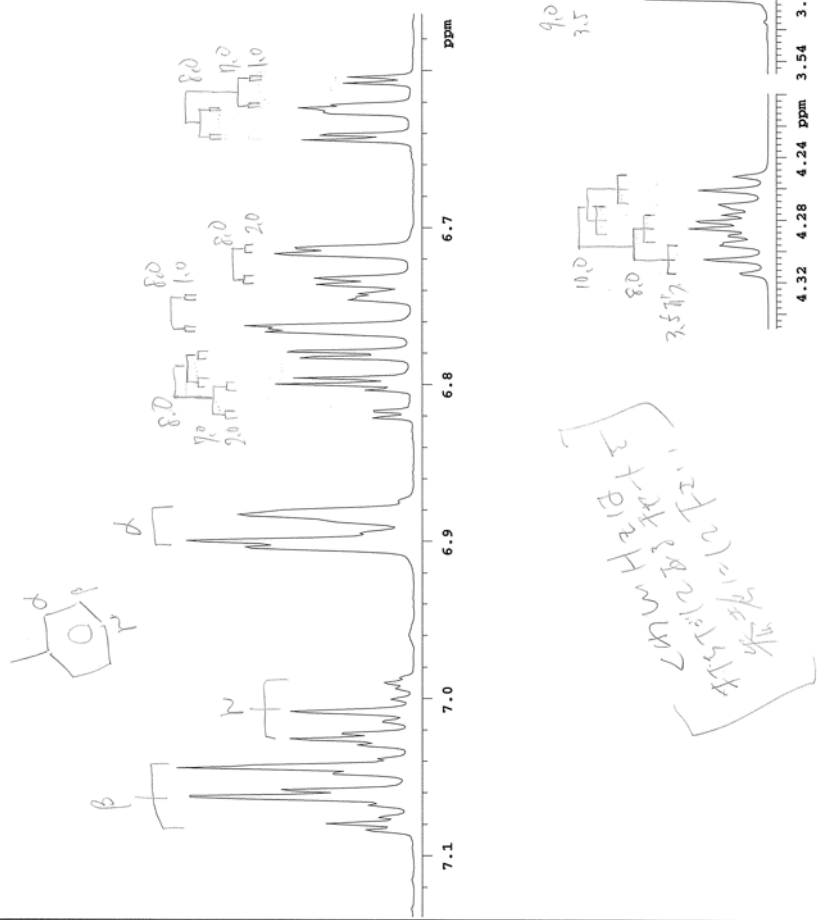

**OBSERVE**

Nucleus \_\_\_\_\_ Freq \_\_\_\_\_ MHz \_\_\_\_\_

Spec. Width \_\_\_\_\_ Hz \_\_\_\_\_ Hz \_\_\_\_\_

Acq. Time \_\_\_\_\_ sec \_\_\_\_\_ sec \_\_\_\_\_

Pulse Width \_\_\_\_\_  $\mu$ sec \_\_\_\_\_

Transients \_\_\_\_\_

**DECOUPLE**

Nucleus \_\_\_\_\_ Offset \_\_\_\_\_ Hz \_\_\_\_\_

Mode \_\_\_\_\_ Power \_\_\_\_\_ db \_\_\_\_\_

Modulation Mode \_\_\_\_\_ Freq \_\_\_\_\_ Hz \_\_\_\_\_

Pulse Width \_\_\_\_\_  $\mu$ sec \_\_\_\_\_ Power Mod \_\_\_\_\_

**PLOT/PROCESSING**

FN \_\_\_\_\_ K RE \_\_\_\_\_ sec CD \_\_\_\_\_ sec

LB \_\_\_\_\_ Hz AF \_\_\_\_\_ sec CDD \_\_\_\_\_

Width \_\_\_\_\_ Hz/gpm Start \_\_\_\_\_ Hz/gpm

Reference \_\_\_\_\_

**EXPERIMENT**

Pulse Sequence \_\_\_\_\_

Tube O.D. \_\_\_\_\_ mm

Temp. \_\_\_\_\_ °C

Solvent \_\_\_\_\_

**SAMPLE**

Number \_\_\_\_\_

File \_\_\_\_\_

Date \_\_\_\_\_

Xc. \_\_\_\_\_

NO 997259J



**<sup>13</sup>C NMR**

```

Kms-625-benzen
exp795 CANBOR

SAMPLE PRESENTATION
date Jan 16 2019 4:00:00 n
solvent c6d6 wet SPECIAL n
file exp temp not used
sv 24038.5 gain 30
at 1.363 spin not used
sp 0.008
ps 0.008
ba 179.16 a1fa 10.000
d1 2.000
nt 12800 i1 n
ct 12800 in n
TRANSMITTER dp y
bn 100.613 hs
sq 100.613 hs PROCESSING 0.30
tprf 1028.5 lb not used
pr 4.881 DISPLAY
DECOUPLER sp -100.8
dn HI wp 20111.5
dc 0 FEL 13877.2
de YP SP 13877.2
decouple w SP -169.0
dppr 40 lp
dmc 9434 wc 400
ac 0
ns 1000
ks 6
mm ph
    
```

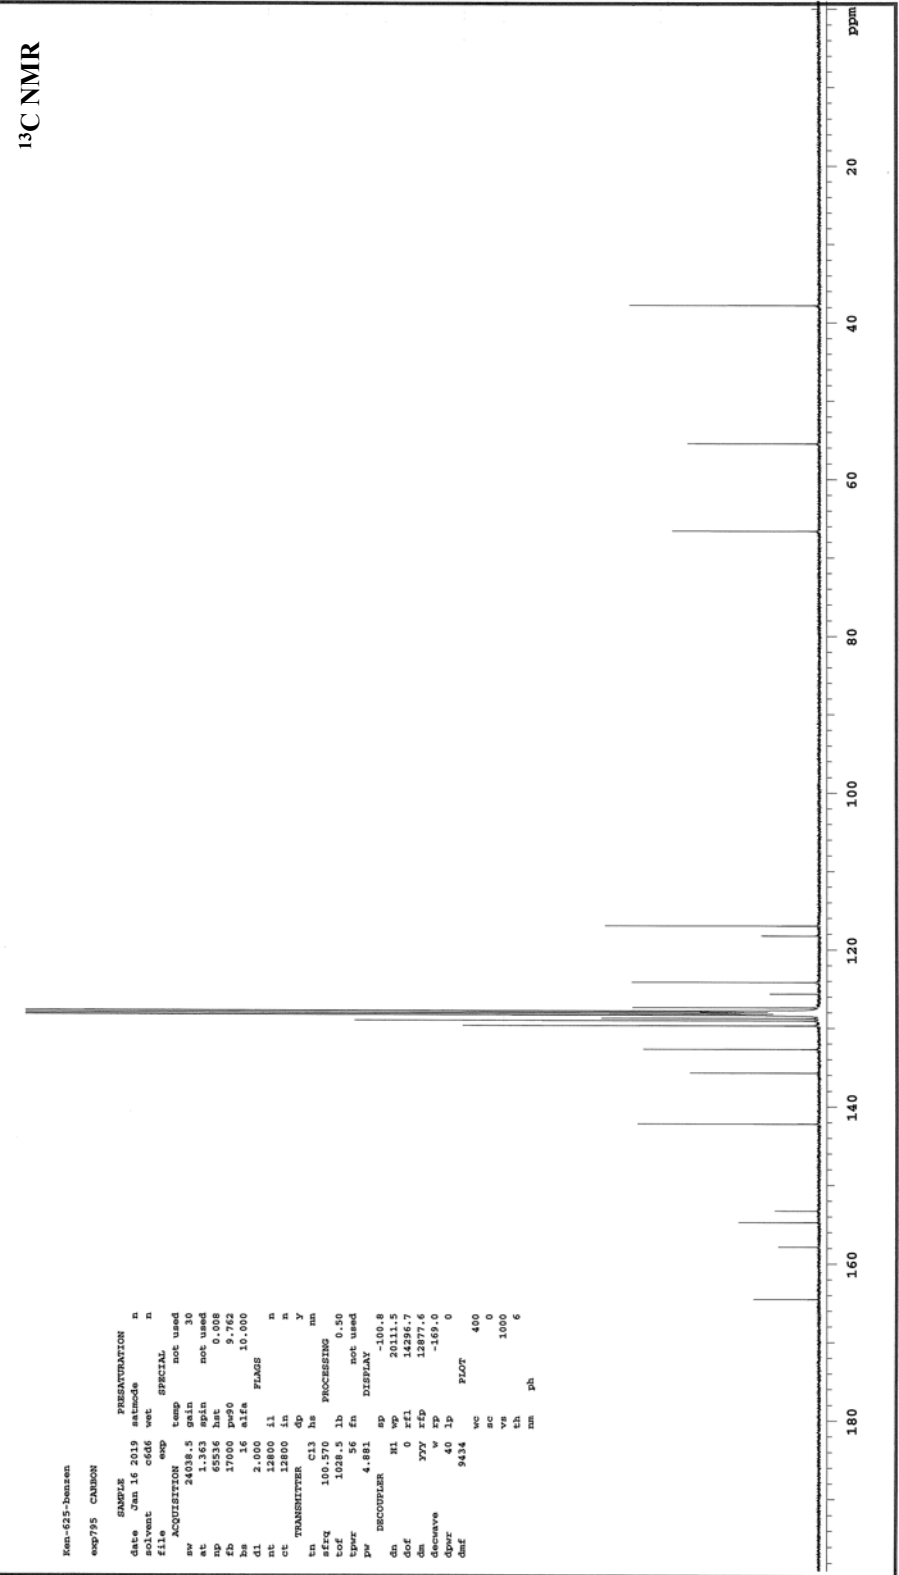

308588V

Nucleus:  Freq:  MHz

Spec. Width:  Hz Offset:  Hz

Acq. Time:  sec Delay:  sec

Pulse Width:   $\mu$ sec Transients:

DECOUPLE: Nucleus:  Hz  
 Mode:  db  
 Modulation Mode:  Hz  
 Pulse Width:   $\mu$ sec Power Mode:

PLOT/PROCESSING: PH:  K RE:  sec CD:  sec  
 LB:  Hz AF:  sec CCD:  sec  
 Width:  Hz/ppm Start:  Hz/ppm  
 Reference:

EXPERIMENT: Pulse Sequence:   
 Tube O.D.:  mm  
 Temp.:  °C  
 Solvent:

SAMPLE: Number:   
 File:   
 Date:   
 XL:

NO 987259J

*See to*

DEPT

Ken-625-benzen  
 exp796 DEPT  
 SAMPLE  
 date Jan 16 2019 146.0  
 solvent c6d6 mult 1.5  
 sample SPECIAL not used  
 ACQUISITION temp not used  
 av 12019.2 gain 30  
 at 1.368 spin 0  
 sp 2775 lb PROCESSING 0  
 br 16 0.50  
 ss 4 fn 65536  
 dl 1.000 SPECTRUM  
 nt 6400 wp 11061.2  
 ct 6400 sp 3519.3  
 tx TRANSMITTER C13 2p 99.4  
 tof -474.9 Al ph 0  
 tpr 56 Al REFERENCE  
 pr 9.762 rf1 2491.8  
 dn DECOUPLER H1 rfp 5578.7  
 dof 40 wc 400  
 dpr 40 wc 400  
 dsf may vs 70711  
 decwve w hzmm 27.65  
 dmf 9434 th 68  
 pp1vl 58  
 pp 11.250

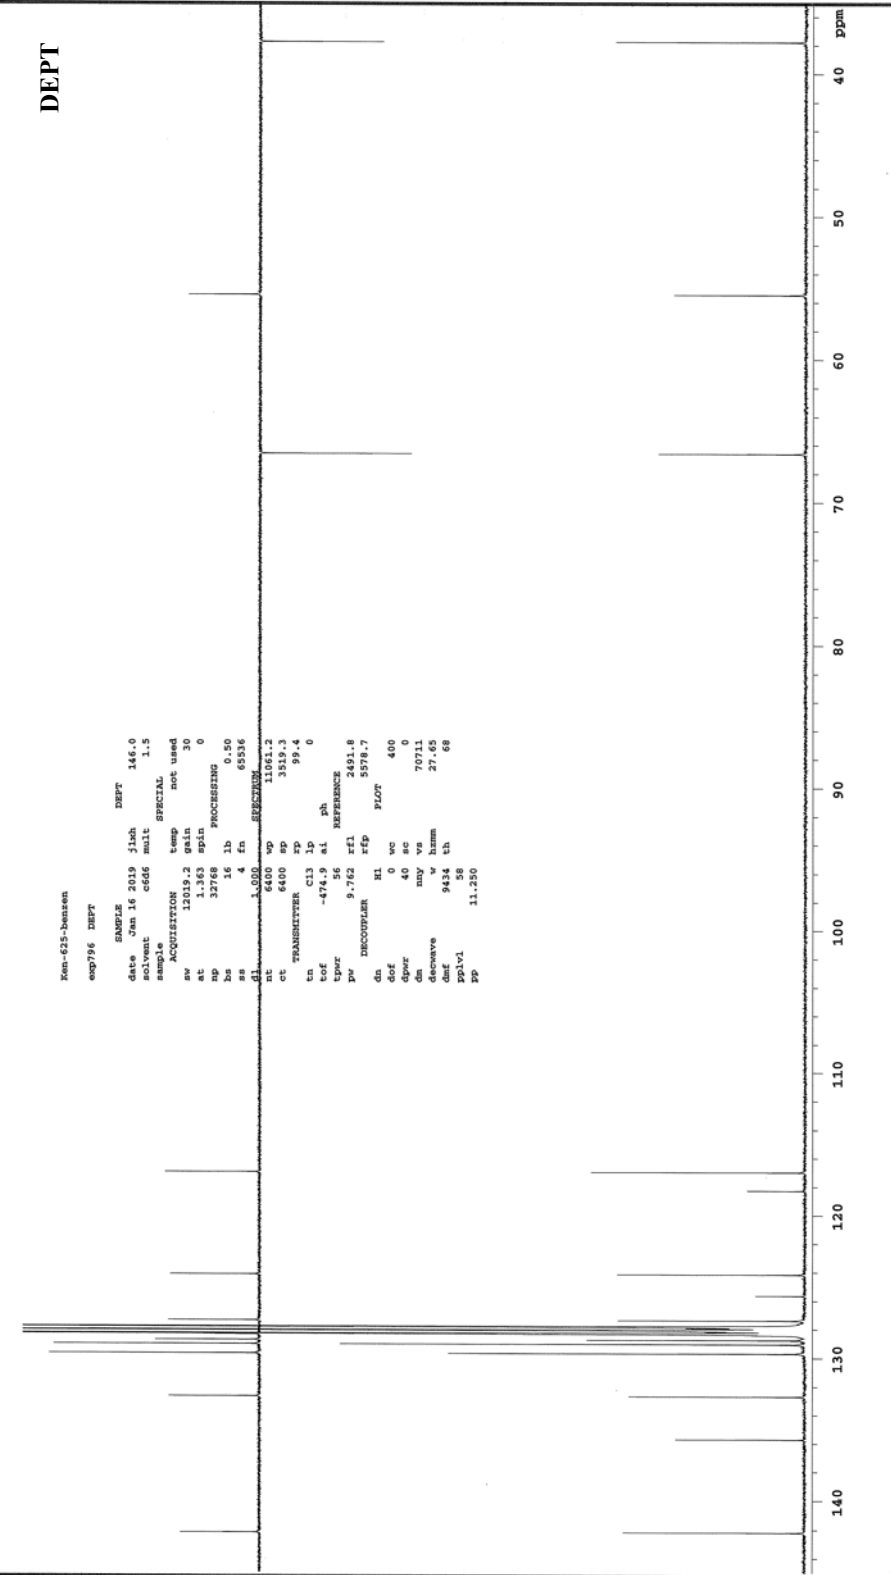

**OBSERVE** Nucleus \_\_\_\_\_ Freq \_\_\_\_\_ MHz  
 Spec. Width \_\_\_\_\_ Hz Offset \_\_\_\_\_ Hz  
 Acq. Time \_\_\_\_\_ sec Delay \_\_\_\_\_ sec  
 Pulse Width \_\_\_\_\_  $\mu$ sec Transients \_\_\_\_\_

**DECOUPLE** Nucleus \_\_\_\_\_ Offset \_\_\_\_\_ Hz  
 Mode \_\_\_\_\_ Power \_\_\_\_\_ db  
 Modulation Mode \_\_\_\_\_ Freq \_\_\_\_\_ Hz  
 Pulse Width \_\_\_\_\_  $\mu$ sec Power Mod \_\_\_\_\_

**PLOT/PROCESSING** FN \_\_\_\_\_ K RE \_\_\_\_\_ sec CD \_\_\_\_\_ sec  
 LB \_\_\_\_\_ Hz AF \_\_\_\_\_ sec CCD \_\_\_\_\_  
 Width \_\_\_\_\_ Hz/ppm Start \_\_\_\_\_ Hz/ppm  
 Reference \_\_\_\_\_

**EXPERIMENT** Pulse Sequence \_\_\_\_\_  
 Tube O.D. \_\_\_\_\_ mm  
 Temp \_\_\_\_\_  $^{\circ}$ C  
 Solvent \_\_\_\_\_

**SAMPLE** Number \_\_\_\_\_  
 File \_\_\_\_\_  
 Date \_\_\_\_\_  
 Xc \_\_\_\_\_

NO 99759J

*Caro*

1D NOE

NOE

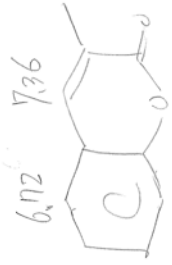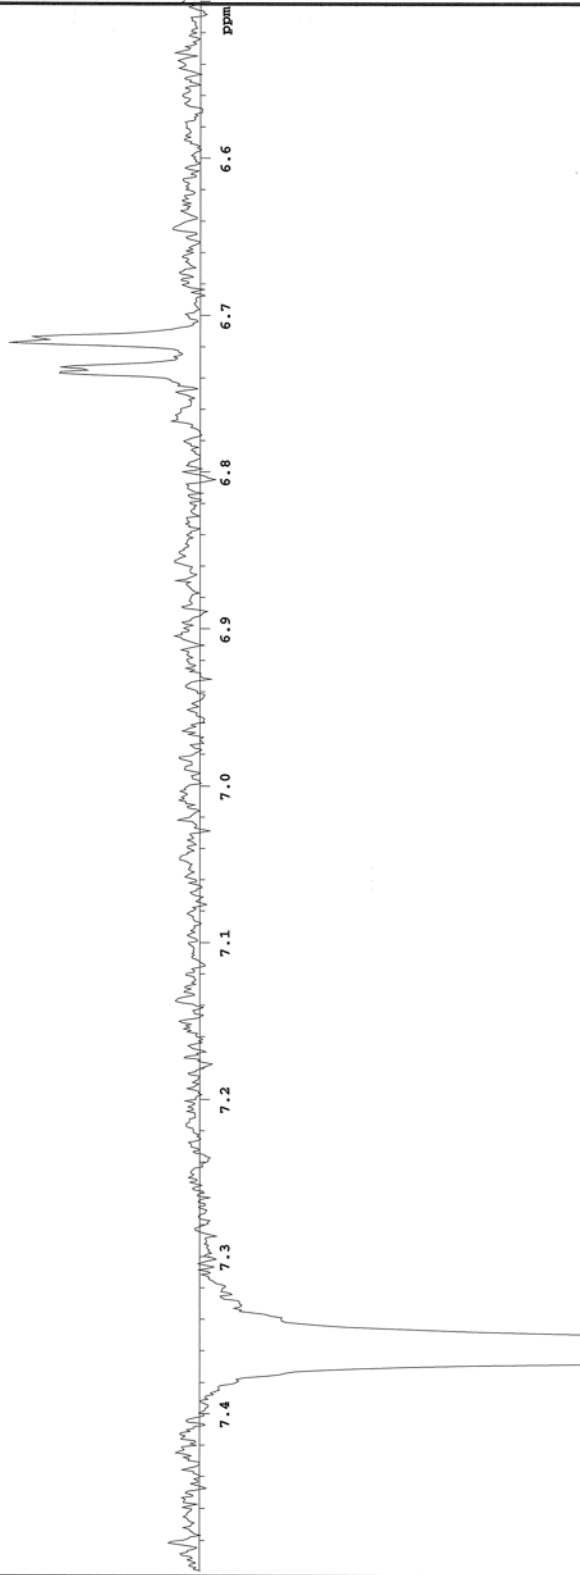

**OBSERVE**

Nucleus \_\_\_\_\_ Spec. Width \_\_\_\_\_ Hz Acq. Time \_\_\_\_\_ sec Pulse Width \_\_\_\_\_  $\mu$ sec

Freq. \_\_\_\_\_ MHz Offset \_\_\_\_\_ Hz Delay \_\_\_\_\_ sec Transients \_\_\_\_\_

**DECOUPLE**

Nucleus \_\_\_\_\_ Mode \_\_\_\_\_ Modulation Mode \_\_\_\_\_ Pulse Width \_\_\_\_\_  $\mu$ sec

Other \_\_\_\_\_ Hz Power \_\_\_\_\_ dB Freq. \_\_\_\_\_ Hz Power Mode \_\_\_\_\_

**PLOT/PROCESSING**

FN \_\_\_\_\_ K RE \_\_\_\_\_ sec CD \_\_\_\_\_ sec

LB \_\_\_\_\_ Hz AF \_\_\_\_\_ sec CCD \_\_\_\_\_

Width \_\_\_\_\_ Hz/gpm Start \_\_\_\_\_ Hz/gpm Reference \_\_\_\_\_

**EXPERIMENT**

Pulse Sequence \_\_\_\_\_ Tube O.D. \_\_\_\_\_ mm Temp. \_\_\_\_\_  $^{\circ}$ C Solvent \_\_\_\_\_

**SAMPLE**

Number \_\_\_\_\_ File \_\_\_\_\_ Date \_\_\_\_\_ Xc. \_\_\_\_\_

7.36 ppm

NOE

NO 99759J

*Lato*

**<sup>1</sup>H-<sup>1</sup>H COSY**

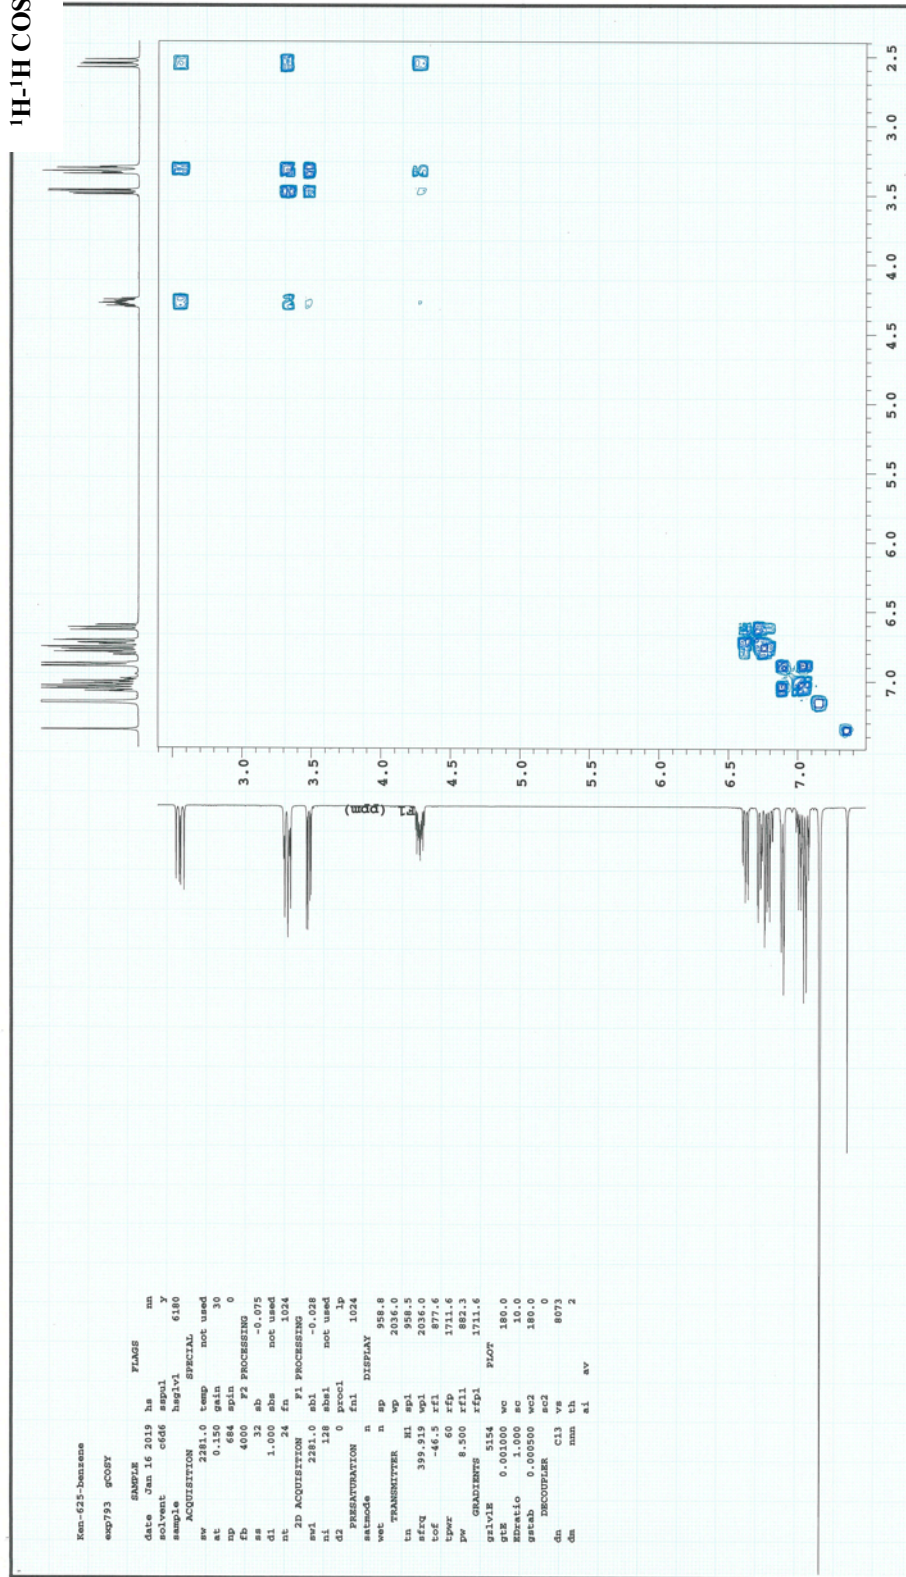

```

Kon-625-benzene
exp793  gCOPY

date   Jan 16 2019   na   FLAGS   un
sample c6d6         hspul   y
solvent c6d6         hspulv1 6180
ACQUISITION SPECIAL
sw 2281.0 temp not used
ns 0.0000   ns   0
nt 0.0000   nt   0
fb 4000     fb   F2 PROCESSING 0
ss 33      sb   -0.075
d1 1.000   sbs   not used
nt 24      fn   1024
2D ACQUISITION F1 PROCESSING
sw 2281.0 sbw1 0.008
nt 0.0000 sbt1 not used
d1 2328 sbt1 not used
d2 0       pproc1 not used
PRESENTATION fn1 DISPLAY 1024
satmode n sp
wet n sp 958.0
ts TRANSMITTER w1 2086.0
w2 2086.0
sfrq 399.519 wpl 2086.0
tof -46.5 xfl 877.6
tpw 8.500 xfl1 1711.6
pw 8.500 xfl1 882.3
GRADIENTS s154 1711.6
p1v1e 0.00100 w0 180.0
kRatio 1.000 w0 180.0
gscab 0.000500 w02 180.0
DECOUPLER sc2 0
dn C13 vs 8073
dm num th 2
al av
  
```

Nucleus: \_\_\_\_\_ Freq: \_\_\_\_\_ MHz  
 Spec. Width: \_\_\_\_\_ Hz Offset: \_\_\_\_\_ Hz  
 Acq Time: \_\_\_\_\_ sec Delay: \_\_\_\_\_ sec  
 Pulse Width: \_\_\_\_\_  $\mu$ sec Transients: \_\_\_\_\_

Nucleus: \_\_\_\_\_ Offset: \_\_\_\_\_ Hz  
 Mode: \_\_\_\_\_ dB  
 Modulation Mode: \_\_\_\_\_ Hz  
 Pulse Width: \_\_\_\_\_  $\mu$ sec Power Mod: \_\_\_\_\_

Reference: \_\_\_\_\_  
 Width: \_\_\_\_\_ Hz/ppm Start: \_\_\_\_\_ Hz/ppm  
 FN: \_\_\_\_\_ K RE: \_\_\_\_\_ sec CD: \_\_\_\_\_ sec  
 LB: \_\_\_\_\_ Hz AF: \_\_\_\_\_ sec CDD: \_\_\_\_\_

Pulse Sequence: \_\_\_\_\_  
 Tube O.D.: \_\_\_\_\_ mm  
 Temp: \_\_\_\_\_ °C  
 Solvent: \_\_\_\_\_

PLOT/PROCESSING: \_\_\_\_\_  
 EXPERIMENT: \_\_\_\_\_  
 F2 (ppm) SAMPLE: \_\_\_\_\_

Number: \_\_\_\_\_  
 File: \_\_\_\_\_  
 Date: \_\_\_\_\_  
 Xu: \_\_\_\_\_

NO 997259J  
 Date

HSQC

Ken-625-benzene  
 Sample: Ken-625-benzene  
 File: exp  
 Pulse Sequence: gHSQCAD

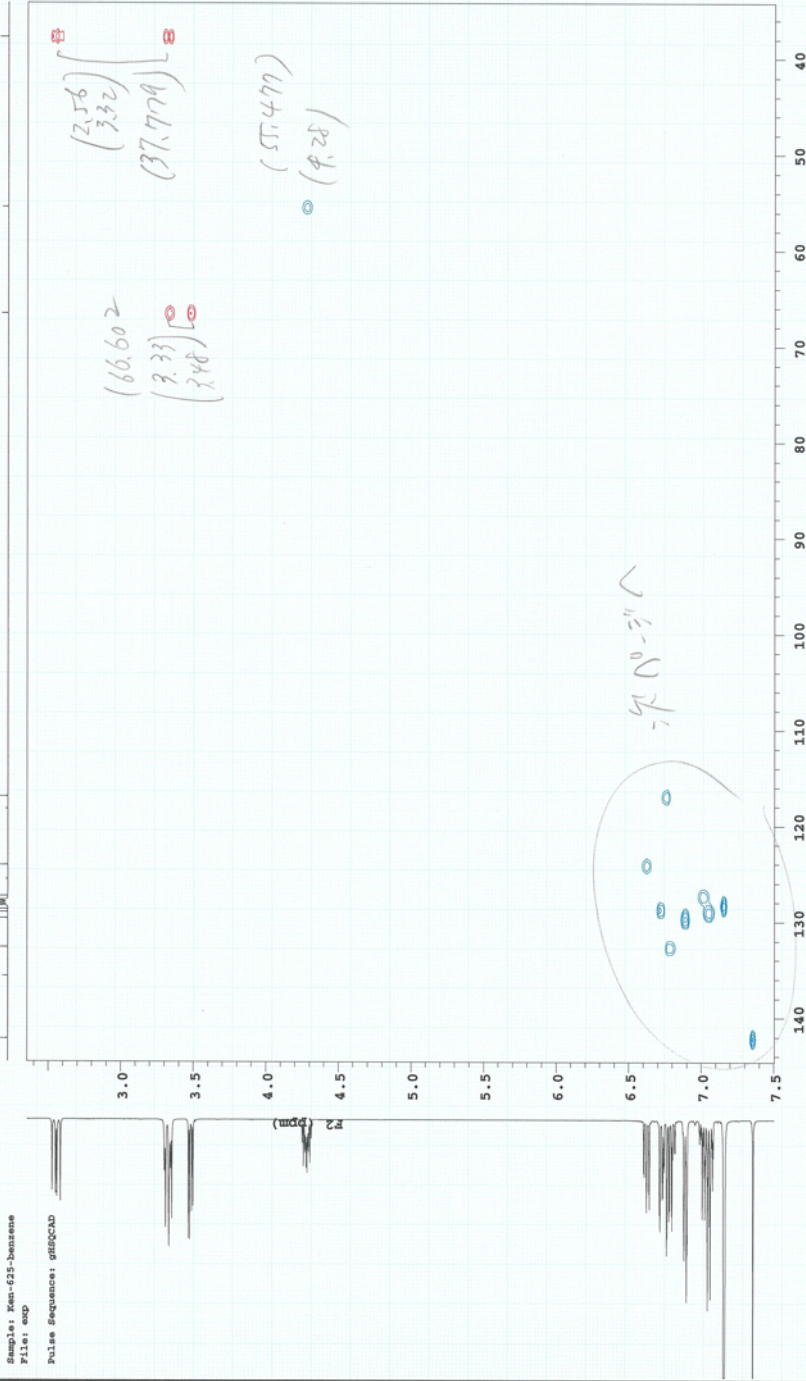

**OBSERVE**

Nucleus: \_\_\_\_\_ MHz \_\_\_\_\_ Hz  
 Spec. Width: \_\_\_\_\_ Hz \_\_\_\_\_ Hz  
 Acq. Time: \_\_\_\_\_ sec \_\_\_\_\_ sec  
 Pulse Width: \_\_\_\_\_  $\mu$ sec \_\_\_\_\_  $\mu$ sec

**DECOUPLE**

Nucleus: \_\_\_\_\_ Offset: \_\_\_\_\_ Hz  
 Mode: \_\_\_\_\_ Power: \_\_\_\_\_ dB  
 Modulation: Mod: \_\_\_\_\_ Freq: \_\_\_\_\_ Hz  
 Pulse Width: \_\_\_\_\_  $\mu$ sec Power Mode: \_\_\_\_\_

**PLOT/PROCESSING**

FN: \_\_\_\_\_ K RE: \_\_\_\_\_ sec CD: \_\_\_\_\_ sec  
 LB: \_\_\_\_\_ Hz AF: \_\_\_\_\_ sec CCD: \_\_\_\_\_ sec  
 Wch: \_\_\_\_\_ Hz/ppm Start: \_\_\_\_\_ Hz/ppm  
 Reference: \_\_\_\_\_

**EXPERIMENT**

Pulse Sequence: \_\_\_\_\_  
 Tube O.D.: \_\_\_\_\_ mm  
 Temp: \_\_\_\_\_  $^{\circ}$ C  
 Solvent: \_\_\_\_\_

**SAMPLE**

Number: \_\_\_\_\_  
 File: \_\_\_\_\_  
 Date: \_\_\_\_\_  
 XL: \_\_\_\_\_

NO 997259J



HSQC

Kem-625-benzene  
 Sample: Kem-625-benzene  
 File: exp  
 Pulse Sequence: gHSQCAD

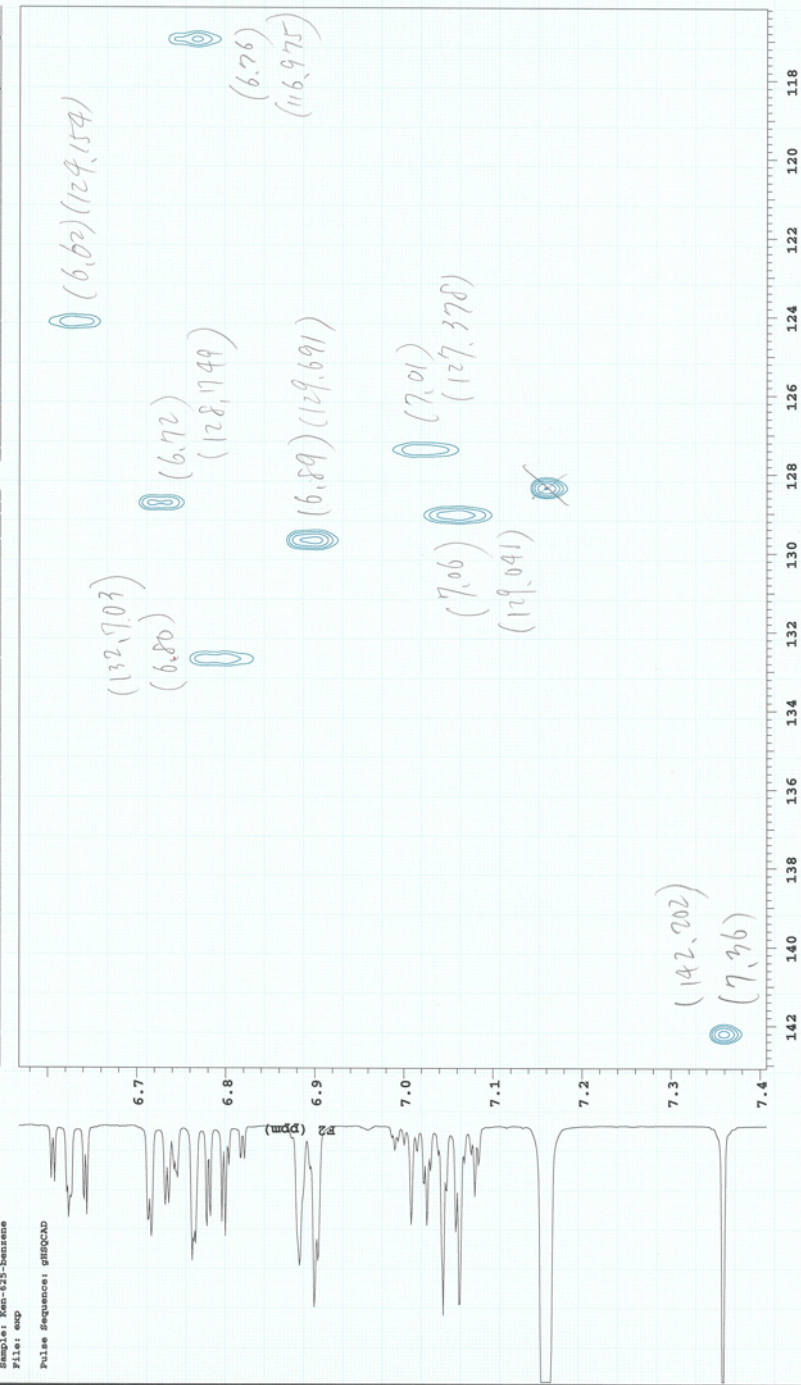

Nucleus: \_\_\_\_\_ Freq: \_\_\_\_\_ MHz  
 Spec. Width: \_\_\_\_\_ Hz Offset: \_\_\_\_\_ Hz  
 Acq. Time: \_\_\_\_\_ sec Delay: \_\_\_\_\_ sec  
 Pulse Width: \_\_\_\_\_  $\mu$ sec Transients: \_\_\_\_\_

DECOUPLE: Nucleus: \_\_\_\_\_ Offset: \_\_\_\_\_ Hz  
 Mode: \_\_\_\_\_ Power: \_\_\_\_\_ dB  
 Modulation: Mode: \_\_\_\_\_ Freq: \_\_\_\_\_ Hz  
 Pulse Width: \_\_\_\_\_  $\mu$ sec Power Mode: \_\_\_\_\_

PLOT/PROCESSING: F1 (ppm): \_\_\_\_\_ sec CD: \_\_\_\_\_ sec  
 F2 (ppm): \_\_\_\_\_ Hz AF: \_\_\_\_\_ Hz  
 Width: \_\_\_\_\_ Hz/gpm Start: \_\_\_\_\_ Hz/gpm  
 Reference: \_\_\_\_\_

EXPERIMENT: Pulse Sequence: \_\_\_\_\_ Tube O.D.: \_\_\_\_\_ mm  
 Temp.: \_\_\_\_\_ °C Solvent: \_\_\_\_\_

SAMPLE: Number: \_\_\_\_\_ File: \_\_\_\_\_  
 Date: \_\_\_\_\_ XL: \_\_\_\_\_

NO 99759J

HMBC

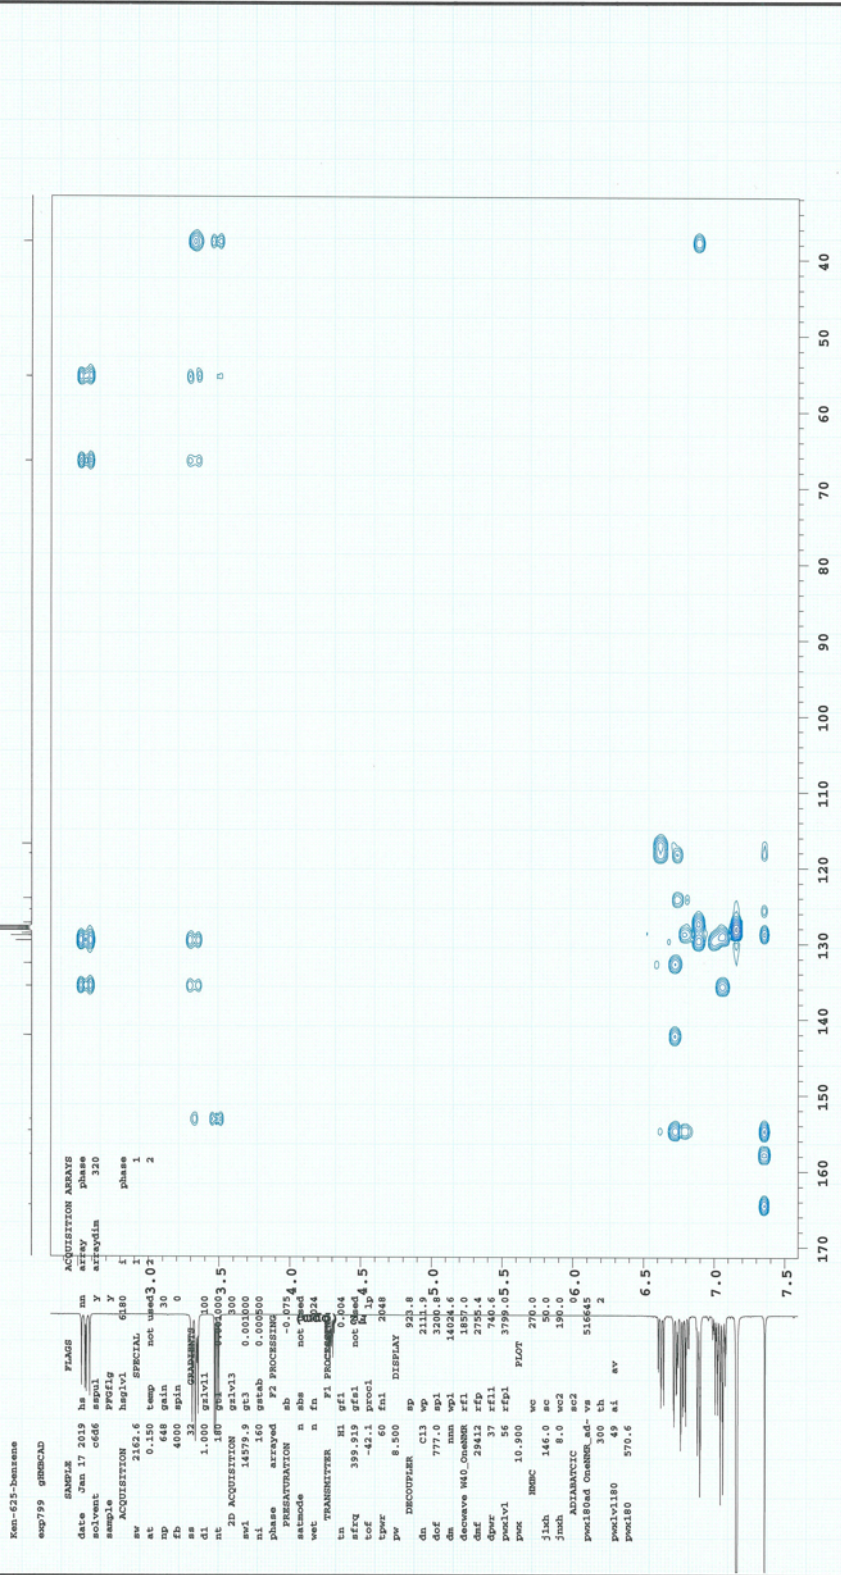

```

Kon-625-benzene
exp9799  gbmrcad
=====
date   Jan 17 2019  ha   FLAG8
sample Jan 17 0646  smp1  solvent
solvent  acrylyl  y   phase
sample   acrylyl  y   phase
acq  2162.6  SPECIAL  6180  f
at      0.130  temp  not used 3.0  2
sb      4000  spin
ss      33    CHANNELS
d1      1.000  gr1vl1  100
nt      180  gr1vl1  1000.003  5
2D ACQUISITION  gr1vl3  300
nr      147940  gr3    6.000
nu      147940  sub    0.00000
Phase  arrayed  F2 PROCESSING
PRESENTATION  sb  not used 4.0
satmode  n  sb  not used 4.0
wet
TRANSMITTER  n  fn  24
h1  404
f1  399.919  f641  not used
tof      -42.1  proc1
tpwr     60  fml  DISPLAY  2048
pw      8.500
=====
DISCOUPLER  sp  928.8
dn      C13  wp  2111.9
dr      7  rps  5.0
dncwve  W40_OneMRK  xF1  1897.0
dnf      29412  rFp  2795.4
dprc    37  rF11  740.6
pncvl1  56  rFp1  3799.05  5
pnc  10.500  vs  p10F  270.0
flsh  HMBC  146.0  sc  180.0
fsmh  8.0  vc2  180.0
ADTANATIC  sc2  06.0
pncvl180  300  th  516645
pncvl180  49  a1  2
pncvl180  570.6
=====
  
```

343580

Nucleus \_\_\_\_\_ Mhz \_\_\_\_\_

Spec. Width \_\_\_\_\_ Hz \_\_\_\_\_ Hz

Acq Time \_\_\_\_\_ sec \_\_\_\_\_ sec

Pulse Width \_\_\_\_\_  $\mu$ sec \_\_\_\_\_ Transients \_\_\_\_\_

Decouple \_\_\_\_\_

Nucleus \_\_\_\_\_

Mode \_\_\_\_\_

Modulation Mode \_\_\_\_\_

Pulse Width \_\_\_\_\_  $\mu$ sec \_\_\_\_\_ Power Mode \_\_\_\_\_

Plot/Processing \_\_\_\_\_

FN \_\_\_\_\_ K \_\_\_\_\_ RE \_\_\_\_\_ sec \_\_\_\_\_ sec

LB \_\_\_\_\_ Hz \_\_\_\_\_ AF \_\_\_\_\_ sec \_\_\_\_\_ sec

Width \_\_\_\_\_ Hz/ppm \_\_\_\_\_ Start \_\_\_\_\_ Hz/ppm

Reference \_\_\_\_\_

Experiment \_\_\_\_\_

Pulse Sequence \_\_\_\_\_

Tube O.D. \_\_\_\_\_ mm

Temp. \_\_\_\_\_  $^{\circ}$ C

Solvent \_\_\_\_\_

Number \_\_\_\_\_

File \_\_\_\_\_

Date \_\_\_\_\_

Xc. \_\_\_\_\_

NO 99759J

*Set*



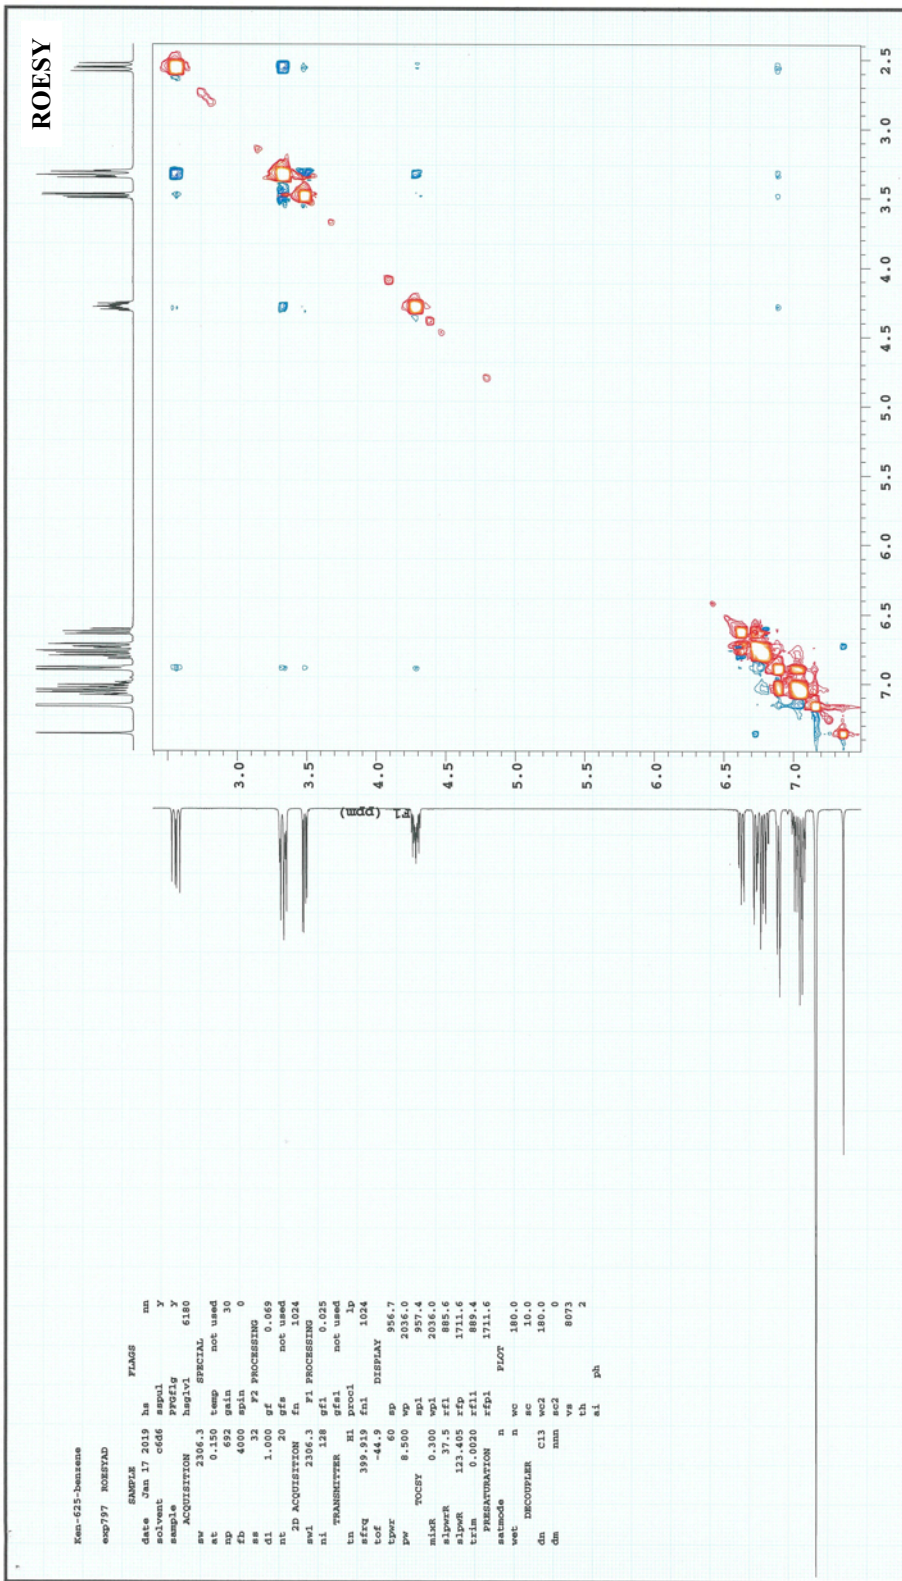

3483580

Nucleus: \_\_\_\_\_ Freq: \_\_\_\_\_ MHz

Spec. Width: \_\_\_\_\_ Hz Offset: \_\_\_\_\_ Hz

Acq. Time: \_\_\_\_\_ sec Delay: \_\_\_\_\_ sec

Pulse Width: \_\_\_\_\_  $\mu$ sec Transmits: \_\_\_\_\_

DECUPLE: Nucleus: \_\_\_\_\_ Other: \_\_\_\_\_ Hz

Mode: \_\_\_\_\_ Power: \_\_\_\_\_ db

Modulation Mode: \_\_\_\_\_ Freq: \_\_\_\_\_ Hz

Pulse Width: \_\_\_\_\_  $\mu$ sec Power Mode: \_\_\_\_\_

PLOT/PROCESSING: F1: \_\_\_\_\_ K RE: \_\_\_\_\_ sec CD: \_\_\_\_\_ sec

LB: \_\_\_\_\_ Hz AF: \_\_\_\_\_ sec CCD: \_\_\_\_\_

Width: \_\_\_\_\_ Hz/ppm Start: \_\_\_\_\_ Hz/ppm

Reference: \_\_\_\_\_

EXPERIMENT: Pulse Sequence: \_\_\_\_\_

Tube O.D.: \_\_\_\_\_ mm

Temp.: \_\_\_\_\_ °C

Solvent: \_\_\_\_\_

Number: \_\_\_\_\_

File: \_\_\_\_\_

Date: \_\_\_\_\_

Xc: \_\_\_\_\_

NO 997259J

*Sato*





**<sup>13</sup>C NMR**

Ken-coumarina-acetone

exp504 CARBON

SAMPLE PREPARATION  
 date Aug 9 2016 setmode n  
 solvent acetone wet n  
 file acetone exp SPECIAL  
 ACQUISITION exp temp not used  
 sw 24038.5 gain 30  
 at 1.363 spin not used  
 ap 6536 het 0.08  
 bp 1700 pps0 1.62  
 bq 2.000 sfs 10.000  
 ql 5120 il n  
 rt 1872 in n  
 ct TRANSMITTER dp y  
 tn C13 hs m  
 afxy 100.570 PROCESSING  
 tof 1028.4 lb not used  
 dpr 4.081 in DESPAN  
 DECOUPLER dp -101.3  
 gn H1 vp 21233.0  
 dof 0 rfl 1374.1  
 dm JYJ rfd 0  
 deconv w xp -66.7  
 dpr 40 lp -0.0  
 GME 9434 WC 400  
 W 0  
 VA 3000  
 th 68  
 ma ph

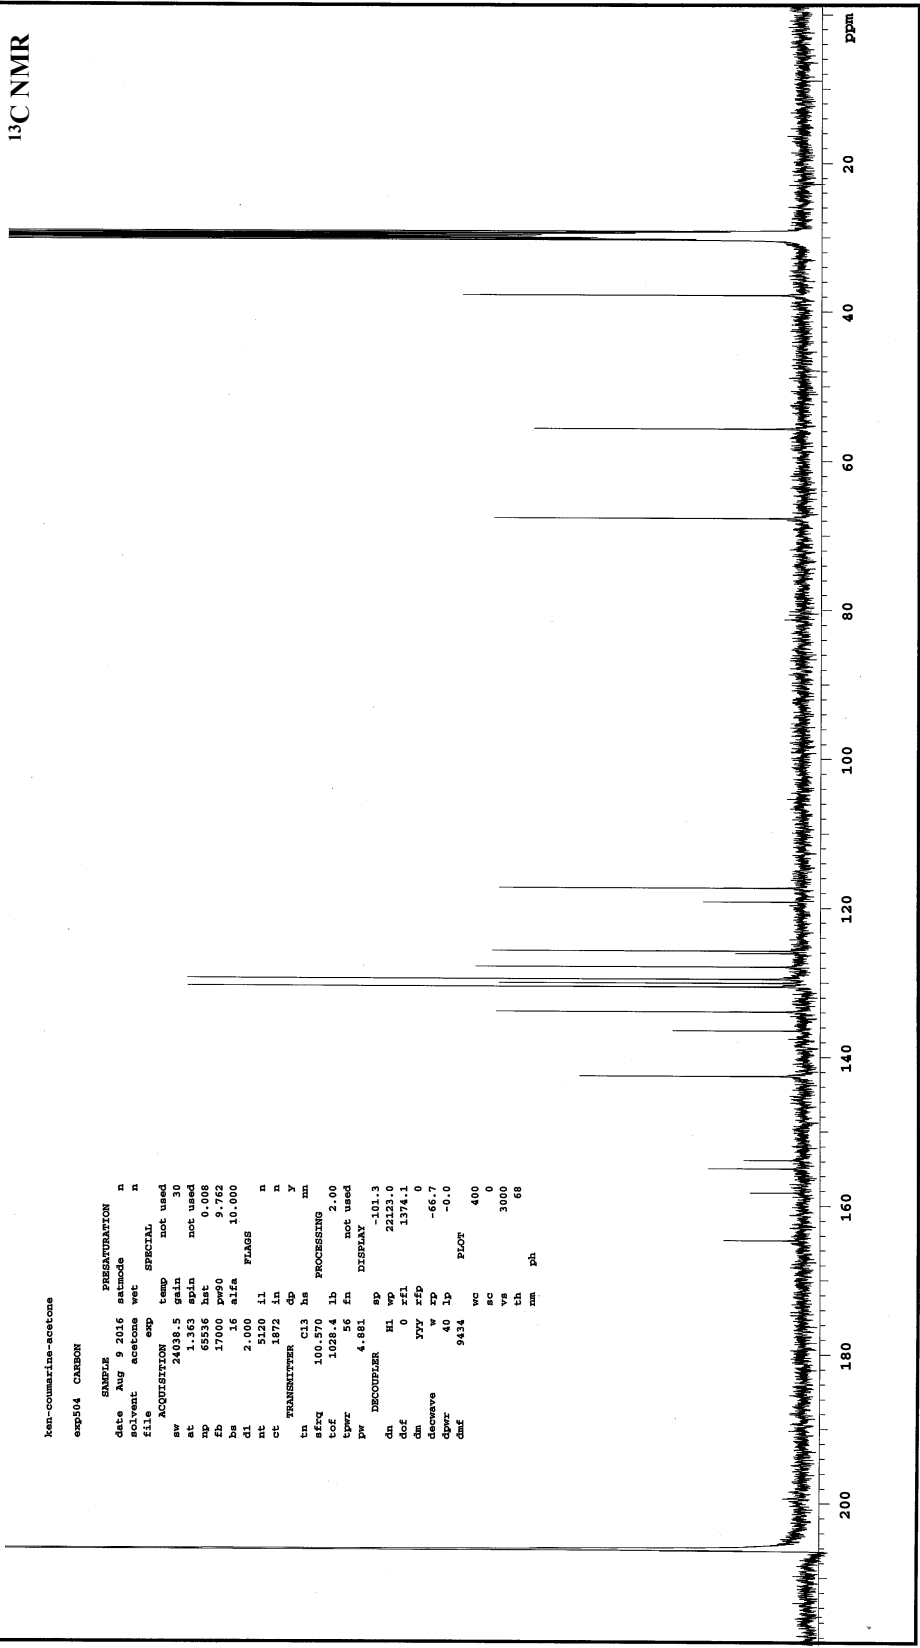

OBSERVE  
 Nucleus \_\_\_\_\_ Freq \_\_\_\_\_ MHz  
 Spec. Width \_\_\_\_\_ Hz Offset \_\_\_\_\_ Hz  
 Acq. Time \_\_\_\_\_ sec Delay \_\_\_\_\_ sec  
 Pulse Width \_\_\_\_\_  $\mu$ sec Transmits \_\_\_\_\_

DECOUPLE  
 Nucleus \_\_\_\_\_ Hz  
 Mode \_\_\_\_\_ db  
 Modulation Mode \_\_\_\_\_ Hz  
 Pulse Width \_\_\_\_\_  $\mu$ sec  
 Power Mode \_\_\_\_\_

PLOT/PROCESSING  
 Offset \_\_\_\_\_ Hz  
 Power \_\_\_\_\_ db  
 Freq \_\_\_\_\_ Hz  
 Power Mode \_\_\_\_\_

EXPERIMENT  
 PR \_\_\_\_\_ K RE \_\_\_\_\_ sec CD \_\_\_\_\_ sec  
 LB \_\_\_\_\_ Hz AF \_\_\_\_\_ sec CCD \_\_\_\_\_  
 Width \_\_\_\_\_ Hz/ppm Start \_\_\_\_\_ Hz/ppm  
 Reference \_\_\_\_\_

SAMPLE  
 Pulse Sequence \_\_\_\_\_  
 Tube O.D. \_\_\_\_\_ mm  
 Temp \_\_\_\_\_  $^{\circ}$ C  
 Solvent \_\_\_\_\_

Number \_\_\_\_\_  
 File \_\_\_\_\_  
 Date \_\_\_\_\_  
 XL \_\_\_\_\_

NO 997259J

*Leto*

ROESY

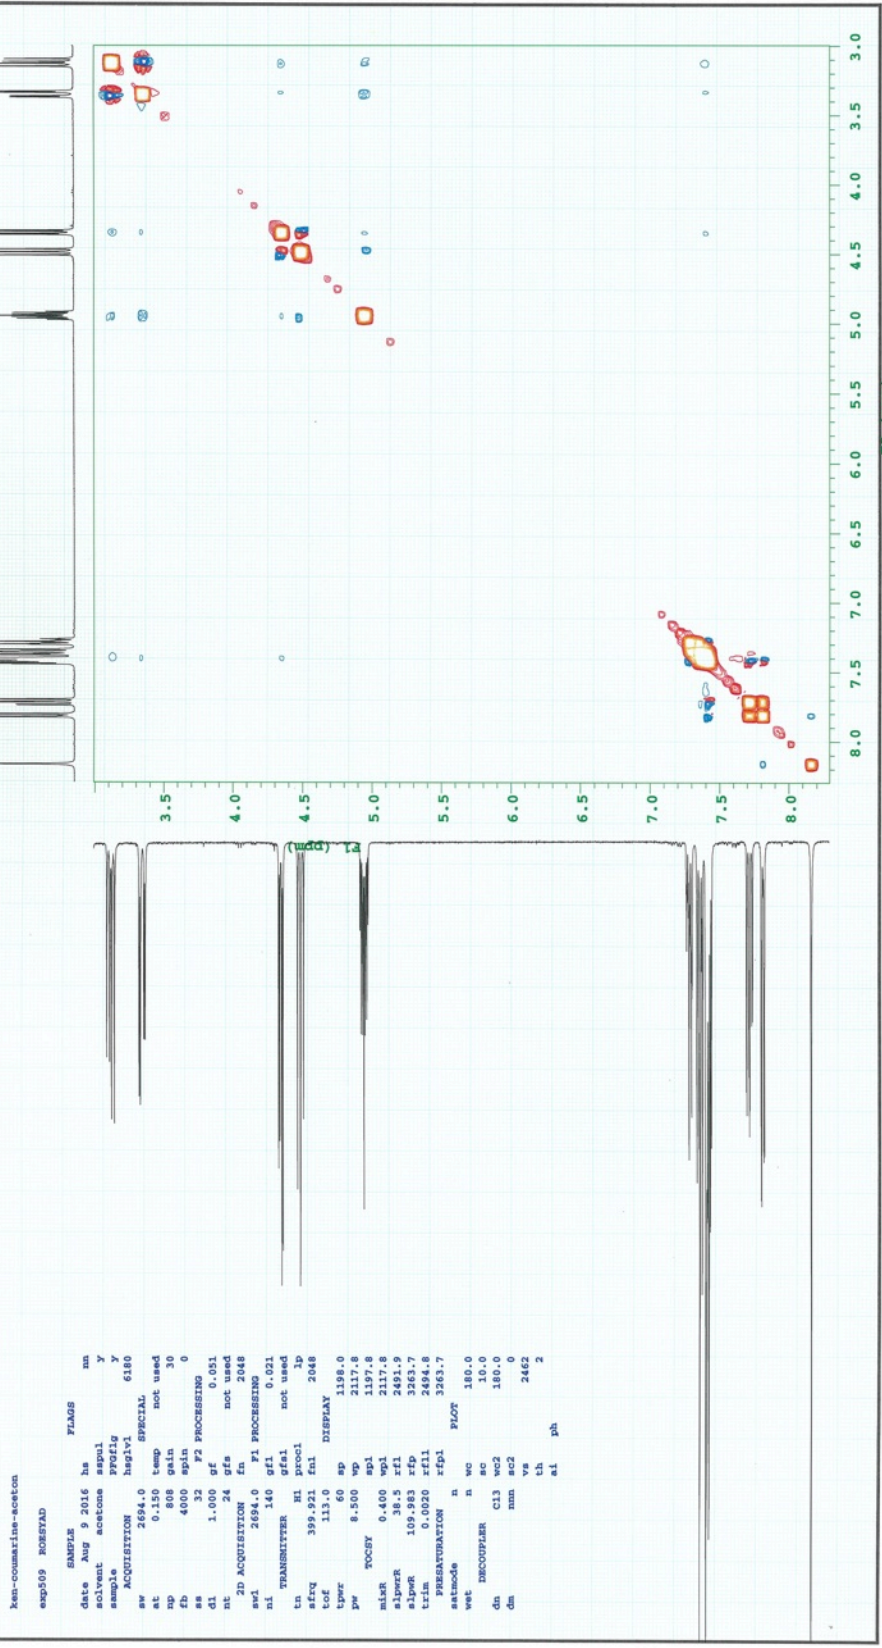

```

ken-coxamine-acetone
exp009 ROESYAD

SAMPLE          FLAGS
date            Aug 9 2016   hs
solvent         acetone      spsig
sample         hsp91v1      y
ACQUISITION    hsp91v1      6180
sw             2694.0       SPECIAL
at             0.150       temp not used
np             808         gain 30
fb             4000       spin 0
ss             1.024       F2 PROCESSING 0
nt             0.054       F2
nt             0.024       F1
2D ACQUISITION 24         gfs not 2048
sw1            2694.0       F1 PROCESSING
nl             140         gfi 0.021
tn             HI         proc1 lp
tcf            399.921       fnt not used
tpr            113.0       sp DISPLAY 2048
pw             8.500       wp 2117.8
pw             8.500       wp 1197.8
mlR            0.400       wpl 2117.8
alpwR          38.5       rfl 2491.9
alpwR          109.983      rfp 3263.7
trm            0.0020      rfil 2494.8
PRESATURATION  rfp1      3263.7
satmode        n         wv PLOT
wet            n         wv 180.0
dn             n         sc 10.0
dm             C13        vc2 180.0
dm            mm         vs 0
dm            mm         vs 2462
dm            th         vs 2
dm            ai         ph 2
    
```

Number \_\_\_\_\_  
 File \_\_\_\_\_  
 Date \_\_\_\_\_  
 XL \_\_\_\_\_

Tube O.D. \_\_\_\_\_ mm  
 Temp \_\_\_\_\_ °C  
 Solvent \_\_\_\_\_

EXPERIMENT

PLT/P/PROCESSING

FN \_\_\_\_\_ K RE \_\_\_\_\_ sec CD \_\_\_\_\_ sec  
 LB \_\_\_\_\_ Hz AF \_\_\_\_\_ sec CCD \_\_\_\_\_  
 Width \_\_\_\_\_ Hz/ppm Start \_\_\_\_\_ Hz/ppm  
 Reference \_\_\_\_\_

DECOUPLE

Nucleus \_\_\_\_\_ MHz  
 Spec. Width \_\_\_\_\_ Hz  
 Acq. Time \_\_\_\_\_ sec  
 Pulse Width \_\_\_\_\_ #sec

Offset \_\_\_\_\_ Hz  
 Power \_\_\_\_\_ dB  
 Freq \_\_\_\_\_ Hz  
 Power Mode \_\_\_\_\_

Nucleus \_\_\_\_\_  
 Mode \_\_\_\_\_  
 Modulation Mode \_\_\_\_\_  
 Pulse Width \_\_\_\_\_ #sec

NO 997259J

*Sato*



**ROESY**

ken-comaraine-aceton  
 exp3es ken-comaraine-aceton  
 ffile exp  
 Pulse Sequence: ROESYAD

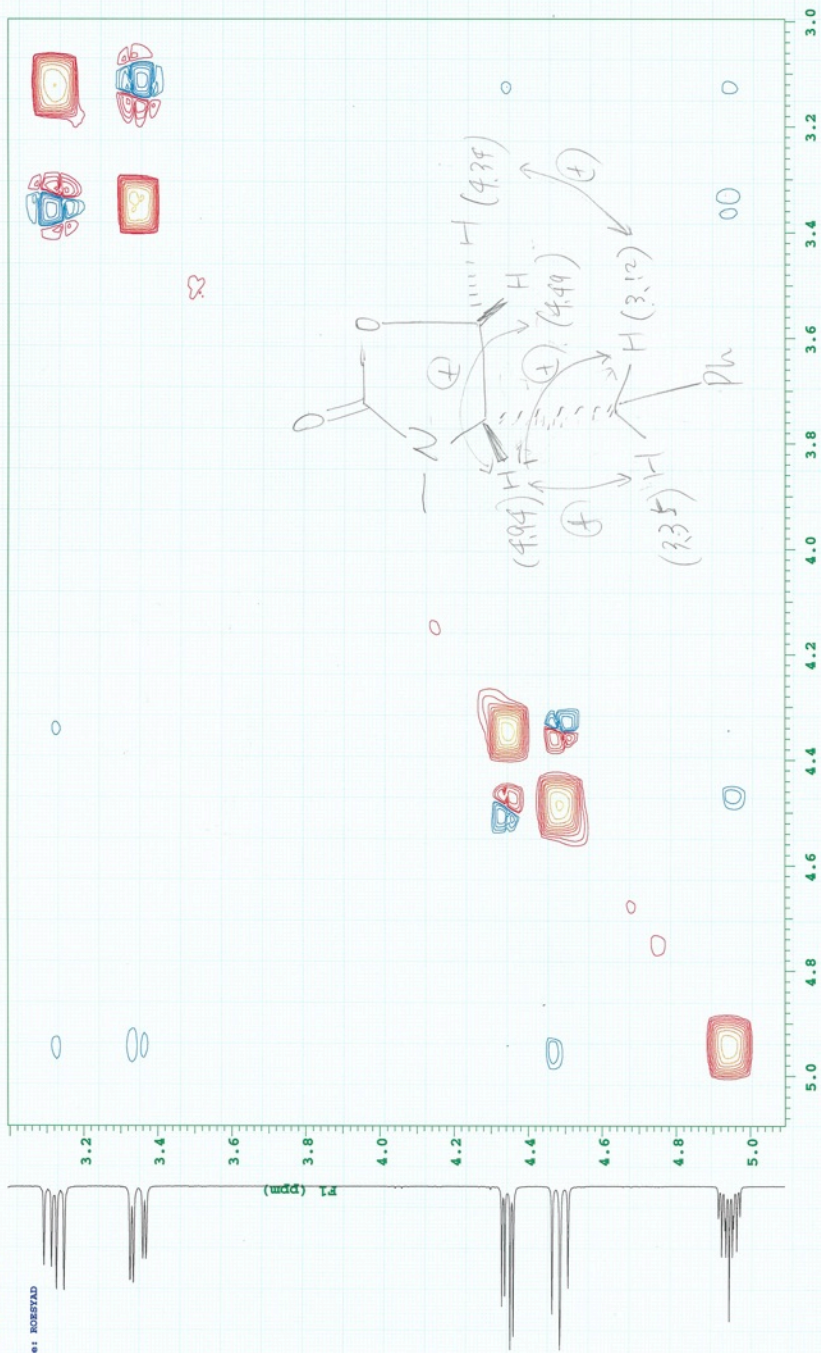

|                             |                             |                  |                       |                         |                    |                 |
|-----------------------------|-----------------------------|------------------|-----------------------|-------------------------|--------------------|-----------------|
| <b>OBSERVE</b>              |                             | Nucleus _____    |                       | Freq _____ MHz          | Nuclear _____      |                 |
| Spec. Width _____ Hz        | Offset _____ Hz             | Offset _____ Hz  | Power _____ dB        | FN _____ K              | RE _____ sec       | CD _____ sec    |
| Acq. Time _____ sec         | Delay _____ sec             | Transients _____ | Modulation: Mod _____ | LB _____ Hz             | AF _____ sec       | CCD _____       |
| Pulse Width _____ $\mu$ sec | Pulse Width _____ $\mu$ sec | Power Mode _____ | Modulation: Mod _____ | Widh _____ Hz/ppm       | Start _____ Hz/ppm | Reference _____ |
| <b>DECOUPLE</b>             |                             |                  |                       | <b>PLOT/PROCESSING</b>  |                    |                 |
| Pulse Sequence _____        |                             |                  |                       | Pulse Sequence _____    |                    |                 |
| Tube O.D. _____ mm          |                             |                  |                       | Tube O.D. _____ mm      |                    |                 |
| Temp _____ $^{\circ}$ C     |                             |                  |                       | Temp _____ $^{\circ}$ C |                    |                 |
| Solvent _____               |                             |                  |                       | Solvent _____           |                    |                 |
| <b>EXPERIMENT</b>           |                             |                  |                       | <b>SAMPLE</b>           |                    |                 |
| Number _____                |                             |                  |                       | File _____              |                    |                 |
| Date _____                  |                             |                  |                       | Date _____              |                    |                 |
| XL _____                    |                             |                  |                       | XL _____                |                    |                 |

NO 997259J

**<sup>1</sup>H-<sup>1</sup>H COSY**

```

ken-conamaria-aceton
exp005 gCOSY
SAMPLE
date Aug 9 2016 ha
solvent acetone hsp1
sample acetone hsp1
ACQUISITION SPECIAL
sv 2694.0 temp not used
at 0.150 gain
nd 808 spin 30
db 40932 a2 PROCESSING 0
dl 1.000 sbx not used
dl 16 fn not used 2048
2D ACQUISITION F1 PROCESSING
sw1 2694.0 sb1 -0.037
ni 200 sbal not used
d2 0 procl lp
PRESATURATION fml
setmode n sd DISPLAY 2048
wct TRANSMITTER n sp 1198.6
tn HI spl 1198.5
sfrq 399.921 wp1 2117.8
tcf 126.3 rfl 1194.3
tpr 60 rfp 1976.8
pw 8.500 rfl1 1193.6
GRADIENTS 5154 PLOT
sflvr 0.001000 wc 180.0
dte 1.000 sc 10.0
HERATIO 1.000 sc 180.0
grtab 0.000500 wc2 0
DECOUPLER C13 vs 871
dm nun th ai odc av 2
  
```

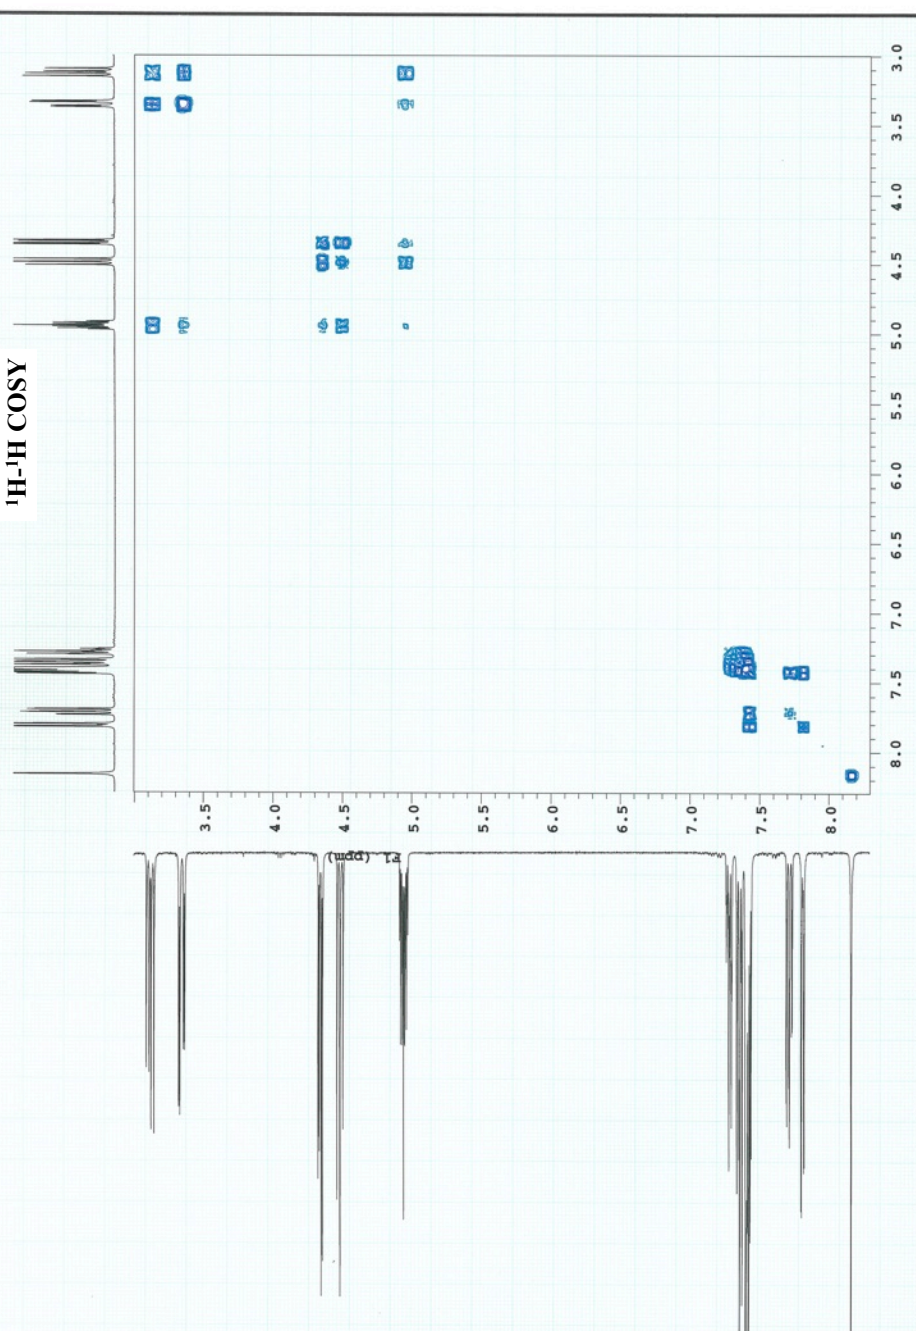

Nucleus \_\_\_\_\_ Freq \_\_\_\_\_ MHz  
 Spec. Width \_\_\_\_\_ Hz Offset \_\_\_\_\_ Hz  
 Acq. Time \_\_\_\_\_ sec Delay \_\_\_\_\_ sec  
 Pulse Width \_\_\_\_\_  $\mu$ sec Transmits \_\_\_\_\_

Nuclear Mode \_\_\_\_\_ Hz  
 Modulation Mode \_\_\_\_\_ Hz  
 Pulse Width \_\_\_\_\_  $\mu$ sec Power Mode \_\_\_\_\_

Offset \_\_\_\_\_ Hz  
 Power \_\_\_\_\_ dB  
 Freq \_\_\_\_\_ Hz  
 Power Mode \_\_\_\_\_

FN \_\_\_\_\_ K RE \_\_\_\_\_ sec CD \_\_\_\_\_ sec  
 LB \_\_\_\_\_ Hz AF \_\_\_\_\_ sec CCD \_\_\_\_\_  
 Width \_\_\_\_\_ Hz/ppm Start \_\_\_\_\_ Hz/ppm  
 Reference \_\_\_\_\_

Pulse Sequence \_\_\_\_\_ Tube O.D. \_\_\_\_\_ mm  
 Temp \_\_\_\_\_  $^{\circ}$ C Solvent \_\_\_\_\_

Number \_\_\_\_\_  
 File \_\_\_\_\_  
 Date \_\_\_\_\_  
 XL \_\_\_\_\_

W3 vrp  
 Lato

NO 997259J





HMBC

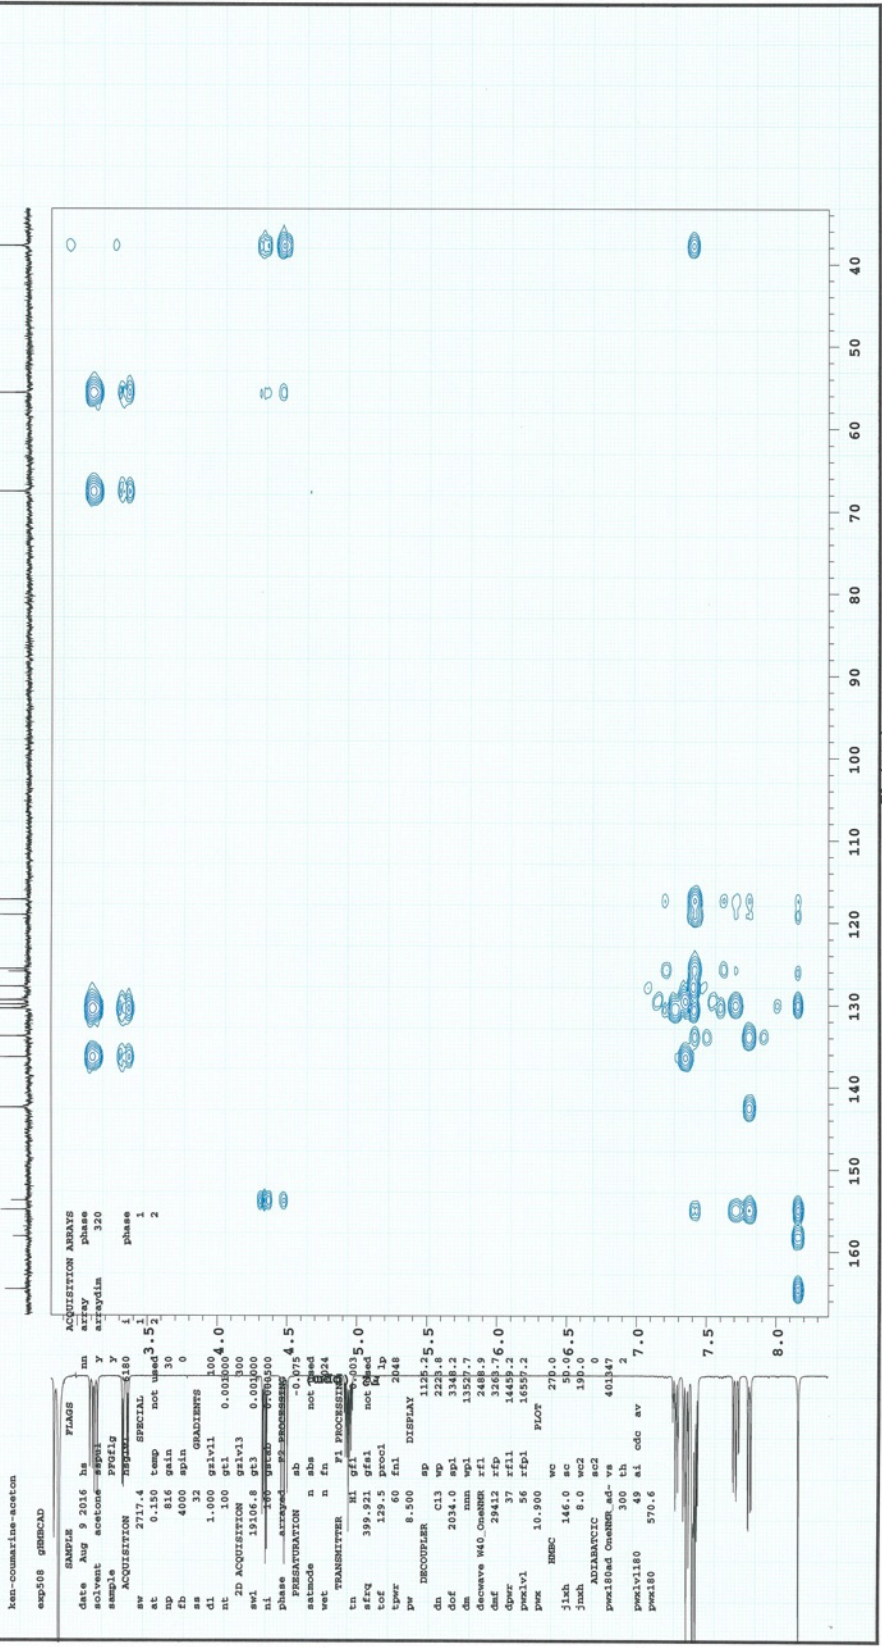

ken-conmarin-aceton  
exp108 gbrncad

ACQUISITION ABNAYS  
date Aug 9 2016 hr  
solvent acetone-d6  
sample PROFIL  
ACQUISITION 6180 f  
sv 2717.4 SPECIAL  
at 0.150 temp not used 3.52  
np 816 gain  
zb 4000 spin  
d1 1.000 g1v11  
nt 100 g1v11 0.00500 4.0  
2D ACQUISITION g1v13 300  
sw1 19106.8 g13 0.00500  
ni 100 v1v13 0.00500  
phase arrayed sp-processing 4.5  
PRESATURATION ab -0.075 4.5  
setmode n sba not used  
w1 100 v1v13 0.00500  
TRANSMITTER PI PROCESSING  
tn MI G11 2003  
sfreq 399.921 gfa1 not used 5.0  
tof 129.5 pcool  
tpr 60 fml 2048  
pw 8.500 DISPLAY  
DECOUPLER sp 1126.25 4.5  
d1 200 v1v13 0.00500  
d2 200 v1v13 0.00500  
d3 200 v1v13 0.00500  
decoupe W40 OnMR R1  
dof 29412 rfp 3268.76 0  
dpr 37 rfp1 14459.2  
pwr1v1 56 rfp1 16557.2  
pwr 10.900 PLOT  
f1ch 146.0 sc 270.0  
f2ch 81.0 sc 50.06 4.5  
JMOD ANDARACTIC  
pwr1v1 300 th 401847  
pwr1v1 49 ai cdc av 2  
pwr1v1 570.6 7.0  
7.5  
8.0

Number \_\_\_\_\_  
File \_\_\_\_\_  
Date \_\_\_\_\_  
XL \_\_\_\_\_

EXPERIMENT  
Pulse Sequenc \_\_\_\_\_  
Tube O.D. \_\_\_\_\_ mm  
Temp \_\_\_\_\_ °C  
Solvent \_\_\_\_\_

PLOT/PROCESSING  
F1 (ppm) \_\_\_\_\_ sec  
F2 (ppm) \_\_\_\_\_ sec  
K RE \_\_\_\_\_ sec  
LB \_\_\_\_\_ Hz AF \_\_\_\_\_ sec  
Width \_\_\_\_\_ Hz/ppm Start \_\_\_\_\_ Hz/ppm  
Reference \_\_\_\_\_

DECOUPLE  
Nucleus \_\_\_\_\_ MHz  
Spec. Width \_\_\_\_\_ Hz  
Acq. Time \_\_\_\_\_ sec  
Pulse Width \_\_\_\_\_ μsec  
Transients \_\_\_\_\_

DECUPLE  
Nucleus \_\_\_\_\_ Hz  
Mode \_\_\_\_\_ fb  
Modulation: Mod \_\_\_\_\_ Hz  
Pulse Width \_\_\_\_\_ μsec  
Power Mode \_\_\_\_\_

OFFSET  
Offset \_\_\_\_\_ Hz  
Power \_\_\_\_\_ fb  
Freq \_\_\_\_\_ Hz  
Power Mode \_\_\_\_\_

OSERVE  
Nucleus \_\_\_\_\_ MHz  
Spec. Width \_\_\_\_\_ Hz  
Acq. Time \_\_\_\_\_ sec  
Pulse Width \_\_\_\_\_ μsec  
Transients \_\_\_\_\_

NO 597259J

## UV-vis absorption spectra

UV-vis absorption spectra of **1B-1C**, **1B-BF<sub>3</sub>•OEt<sub>2</sub>** and **1C-Zn(ClO<sub>4</sub>)<sub>2</sub>•6H<sub>2</sub>O** were shown below.

UV-vis absorption spectrum of **1A** was difficult to obtain, because of its low solubility in CH<sub>3</sub>CN.

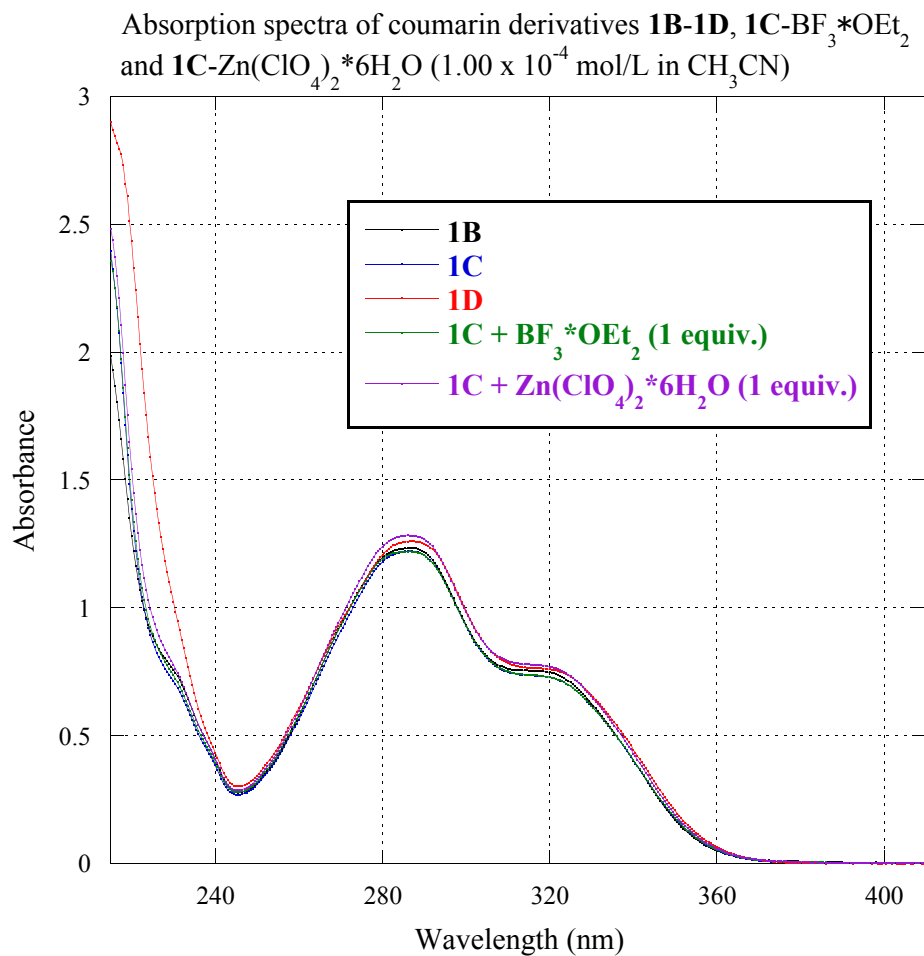



UV-vis absorption spectra of **1C**-Zn(ClO<sub>4</sub>)<sub>2</sub>•6H<sub>2</sub>O complexes. Enhanced absorption of **1C**-Zn(ClO<sub>4</sub>)<sub>2</sub>•6H<sub>2</sub>O at 287 nm was observed with an increasing amount of Zn(ClO<sub>4</sub>)<sub>2</sub>•6H<sub>2</sub>O.

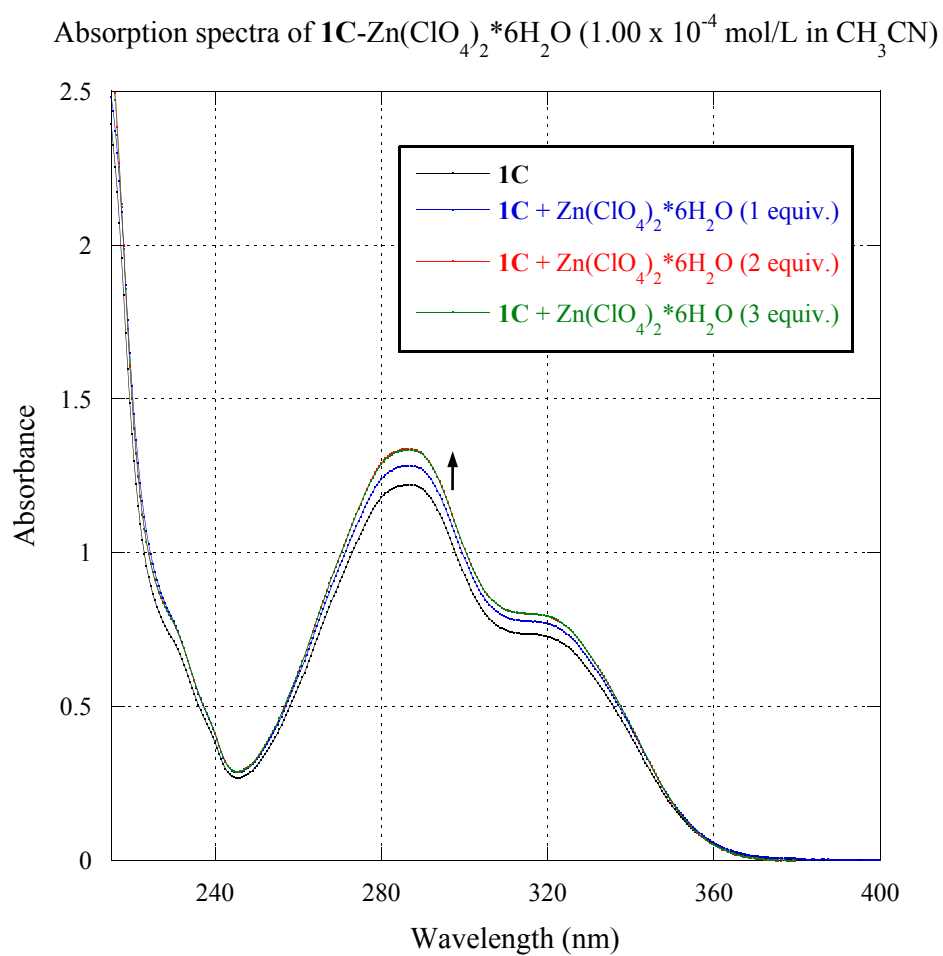

UV-vis absorption spectra of *syn*-HT dimers were shown as below.

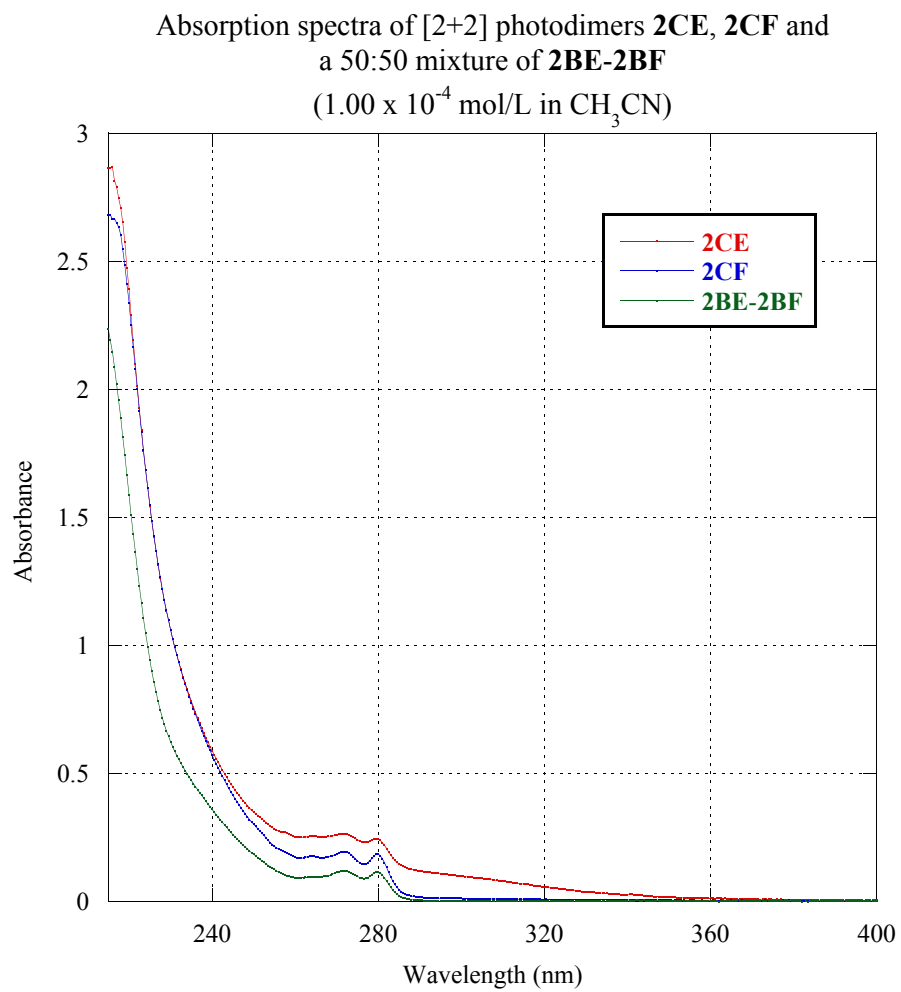

## Crystal data

1C

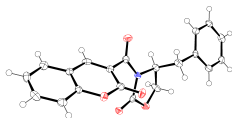

### Crystal data

|                               |                                                          |
|-------------------------------|----------------------------------------------------------|
| $C_{20}H_{15}NO_5$            | $V = 1584.3 (5) \text{ \AA}^3$                           |
| $M_r = 349.33$                | $Z = 4$                                                  |
| $a = 6.1686 (11) \text{ \AA}$ | $F(000) = 728$                                           |
| $b = 15.664 (3) \text{ \AA}$  | $D_x = 1.465 \text{ Mg m}^{-3}$                          |
| $c = 16.396 (3) \text{ \AA}$  | Mo K $\alpha$ radiation, $\lambda = 0.71073 \text{ \AA}$ |
| $\alpha = 90^\circ$           | $m = 0.11 \text{ mm}^{-1}$                               |
| $\beta = 90^\circ$            | $T = 296 \text{ K}$                                      |
| $\gamma = 90^\circ$           | $0.40 \times 0.20 \times 0.20 \text{ mm}$                |

### Data collection

|                                          |                                                              |
|------------------------------------------|--------------------------------------------------------------|
| Radiation source: fine-focus sealed tube | $R_{\text{int}} = 0.039$                                     |
| Graphite monochromator                   | $q_{\text{max}} = 20.9^\circ$ , $q_{\text{min}} = 1.8^\circ$ |
| 5186 measured reflections                | $h = -5 \text{ @ } 6$                                        |
| 1681 independent reflections             | $k = -11 \text{ @ } 15$                                      |
| 1510 reflections with $I > 2s(I)$        | $l = -16 \text{ @ } 16$                                      |

### Refinement

|                                                                |                                                                        |
|----------------------------------------------------------------|------------------------------------------------------------------------|
| Refinement on $F^2$                                            | Secondary atom site location: difference Fourier map                   |
| Least-squares matrix: full                                     | Hydrogen site location: inferred from neighbouring sites               |
| $R[F^2 > 2s(F^2)] = 0.033$                                     | H atoms treated by a mixture of independent and constrained refinement |
| $wR(F^2) = 0.072$                                              | $w = 1/[s^2(F_o^2) + (0.0399P)^2]$ where $P = (F_o^2 + 2F_c^2)/3$      |
| $S = 1.02$                                                     | $(D/s)_{\text{max}} < 0.001$                                           |
| 1681 reflections                                               | $D\rho_{\text{max}} = 0.14 \text{ e \AA}^{-3}$                         |
| 235 parameters                                                 | $D\rho_{\text{min}} = -0.16 \text{ e \AA}^{-3}$                        |
| 0 restraints                                                   | Absolute structure: Flack H D (1983), Acta Cryst. A39, 876-881         |
| Primary atom site location: structure-invariant direct methods | Absolute structure parameter: -1.5 (16)                                |

### Special details

**Geometry.** All esds (except the esd in the dihedral angle between two l.s. planes) are estimated using the full covariance matrix. The cell esds are taken into account individually in the estimation of esds in distances, angles and torsion angles; correlations between esds in cell parameters are only used when they are defined by crystal symmetry. An approximate (isotropic) treatment of cell esds is used for estimating esds involving l.s. planes.

**Refinement.** Refinement of  $F^2$  against ALL reflections. The weighted R-factor  $wR$  and goodness of fit  $S$  are based on  $F^2$ , conventional R-factors  $R$  are based on  $F$ , with  $F$  set to zero for negative  $F^2$ . The threshold expression of  $F^2 > 2\sigma(F^2)$  is used only for calculating R-factors(gt) etc. and is not relevant to the choice of reflections for refinement. R-factors based on  $F^2$  are statistically about twice as large as those based on  $F$ , and R-factors based on ALL data will be even larger.

Fractional atomic coordinates and isotropic or equivalent isotropic displacement parameters ( $\text{\AA}^2$ ) for (hk041\_2\_0m\_specegroups)

|      | x          | y            | z             | $U_{iso}^*/U_{eq}$ |
|------|------------|--------------|---------------|--------------------|
| O5   | 0.8961 (3) | 0.14397 (12) | 0.30397 (11)  | 0.0185 (5)         |
| O1   | 0.7006 (4) | 0.35352 (13) | 0.34080 (11)  | 0.0195 (6)         |
| O4   | 1.0368 (4) | 0.05975 (13) | 0.20746 (12)  | 0.0201 (6)         |
| O3   | 0.4333 (4) | 0.18725 (13) | 0.12513 (12)  | 0.0242 (6)         |
| O2   | 0.8909 (4) | 0.31524 (12) | 0.23251 (12)  | 0.0218 (6)         |
| C4   | 0.1658 (6) | 0.29297 (19) | 0.41969 (17)  | 0.0205 (9)         |
| H4   | 0.0491     | 0.2578       | 0.4071        | 0.025*             |
| C9   | 0.5711 (6) | 0.19044 (19) | 0.17841 (18)  | 0.0177 (8)         |
| C20  | 0.7892 (6) | 0.10853 (18) | -0.10400 (17) | 0.0185 (9)         |
| H20  | 0.6575     | 0.1357       | -0.0947       | 0.022*             |
| C6   | 0.5179 (5) | 0.34848 (19) | 0.38868 (17)  | 0.0155 (8)         |
| C19  | 0.8196 (6) | 0.06235 (18) | -0.17544 (19) | 0.0194 (8)         |
| H19  | 0.7088     | 0.0589       | -0.2137       | 0.023*             |
| C16  | 1.1501 (6) | 0.07503 (19) | -0.06217 (18) | 0.0225 (9)         |
| H16  | 1.2631     | 0.0801       | -0.0249       | 0.027*             |
| C1   | 0.5151 (6) | 0.39802 (19) | 0.45869 (19)  | 0.0213 (9)         |
| H1   | 0.6320     | 0.4329       | 0.4718        | 0.026*             |
| C15  | 0.9536 (6) | 0.11452 (18) | -0.04633 (18) | 0.0154 (8)         |
| C8   | 0.5504 (6) | 0.24599 (17) | 0.25149 (17)  | 0.0161 (8)         |
| C5   | 0.3460 (5) | 0.29565 (18) | 0.36809 (17)  | 0.0149 (8)         |
| C7   | 0.3689 (6) | 0.24457 (18) | 0.29588 (18)  | 0.0187 (8)         |
| H7   | 0.2548     | 0.2097       | 0.2797        | 0.022*             |
| C13  | 0.8132 (6) | 0.09662 (18) | 0.09553 (17)  | 0.0181 (8)         |
| H13  | 0.6858     | 0.0689       | 0.0716        | 0.022*             |
| C11  | 0.8945 (5) | 0.11822 (18) | 0.2349 (2)    | 0.0165 (8)         |
| C14  | 0.9135 (6) | 0.15854 (19) | 0.03440 (16)  | 0.0200 (8)         |
| H14A | 0.8167     | 0.2066       | 0.0263        | 0.024*             |
| H14B | 1.0494     | 0.1801       | 0.0558        | 0.024*             |
| C2   | 0.3340 (6) | 0.39449 (19) | 0.50896 (19)  | 0.0228 (9)         |
| H2   | 0.3292     | 0.4274       | 0.5562        | 0.027*             |
| C3   | 0.1606 (6) | 0.34226 (19) | 0.48916 (18)  | 0.0219 (8)         |
| H3   | 0.0398     | 0.3405       | 0.5231        | 0.026*             |
| C10  | 0.7277 (6) | 0.30460 (19) | 0.27113 (19)  | 0.0181 (8)         |
| C18  | 1.0156 (6) | 0.02138 (19) | -0.18961 (19) | 0.0232 (9)         |
| H18  | 1.0357     | -0.0103      | -0.2370       | 0.028*             |
| C17  | 1.1801 (6) | 0.02786 (19) | -0.13330 (18) | 0.0228 (9)         |
| H17  | 1.3117     | 0.0007       | -0.1428       | 0.027*             |
| C12  | 0.9699 (6) | 0.0298 (2)   | 0.12789 (17)  | 0.0266 (9)         |
| H12A | 0.8991     | -0.0253      | 0.1322        | 0.032*             |
| H12B | 1.0941     | 0.0243       | 0.0920        | 0.032*             |
| N1   | 0.7539 (4) | 0.13946 (16) | 0.17201 (14)  | 0.0159 (7)         |

Atomic displacement parameters ( $\text{\AA}^2$ ) for (hk041\_2\_0m\_specegroups)

|     | $U^{11}$    | $U^{22}$    | $U^{33}$    | $U^{12}$     | $U^{13}$     | $U^{23}$     |
|-----|-------------|-------------|-------------|--------------|--------------|--------------|
| O5  | 0.0218 (15) | 0.0200 (11) | 0.0138 (12) | -0.0015 (11) | -0.0023 (11) | -0.0014 (11) |
| O1  | 0.0189 (15) | 0.0188 (12) | 0.0207 (12) | -0.0019 (11) | 0.0025 (11)  | -0.0031 (11) |
| O4  | 0.0208 (15) | 0.0207 (11) | 0.0188 (13) | 0.0055 (11)  | -0.0019 (11) | 0.0001 (10)  |
| O3  | 0.0198 (15) | 0.0288 (13) | 0.0240 (12) | 0.0017 (11)  | -0.0050 (13) | -0.0028 (11) |
| O2  | 0.0177 (16) | 0.0209 (12) | 0.0267 (12) | -0.0030 (11) | 0.0052 (13)  | 0.0029 (10)  |
| C4  | 0.022 (2)   | 0.0161 (17) | 0.0236 (19) | 0.0012 (17)  | 0.0015 (18)  | 0.0034 (16)  |
| C9  | 0.017 (2)   | 0.0166 (17) | 0.0193 (19) | -0.0039 (17) | 0.0001 (18)  | 0.0023 (16)  |
| C20 | 0.018 (2)   | 0.0181 (18) | 0.0197 (19) | 0.0022 (16)  | 0.0001 (19)  | 0.0037 (16)  |
| C6  | 0.017 (2)   | 0.0145 (17) | 0.0150 (18) | 0.0017 (18)  | 0.0009 (17)  | 0.0020 (16)  |

|     |             |             |             |              |              |              |
|-----|-------------|-------------|-------------|--------------|--------------|--------------|
| C19 | 0.023 (2)   | 0.0191 (17) | 0.0160 (18) | -0.0047 (18) | -0.0040 (16) | 0.0014 (16)  |
| C16 | 0.025 (3)   | 0.0246 (19) | 0.018 (2)   | -0.0026 (19) | -0.0040 (17) | 0.0048 (17)  |
| C1  | 0.023 (3)   | 0.0191 (17) | 0.022 (2)   | -0.0006 (17) | -0.0038 (19) | 0.0037 (18)  |
| C15 | 0.016 (2)   | 0.0123 (16) | 0.0174 (18) | -0.0001 (16) | 0.0040 (18)  | 0.0033 (15)  |
| C8  | 0.017 (2)   | 0.0153 (17) | 0.0161 (18) | 0.0030 (16)  | -0.0017 (17) | -0.0026 (15) |
| C5  | 0.016 (2)   | 0.0118 (17) | 0.0168 (17) | 0.0030 (17)  | 0.0002 (17)  | 0.0027 (16)  |
| C7  | 0.019 (2)   | 0.0146 (17) | 0.0228 (18) | 0.0022 (16)  | -0.0089 (18) | 0.0000 (16)  |
| C13 | 0.022 (2)   | 0.0166 (17) | 0.0163 (18) | 0.0015 (17)  | 0.0003 (17)  | -0.0027 (15) |
| C11 | 0.013 (2)   | 0.0116 (18) | 0.025 (2)   | -0.0028 (16) | 0.004 (2)    | 0.0047 (16)  |
| C14 | 0.026 (2)   | 0.0153 (17) | 0.0191 (17) | 0.0016 (17)  | -0.0019 (17) | -0.0002 (16) |
| C2  | 0.039 (3)   | 0.0129 (17) | 0.0168 (19) | 0.008 (2)    | -0.002 (2)   | 0.0012 (15)  |
| C3  | 0.026 (2)   | 0.0195 (19) | 0.0203 (18) | 0.0067 (19)  | 0.0079 (17)  | 0.0038 (17)  |
| C10 | 0.019 (2)   | 0.0171 (18) | 0.0184 (19) | 0.0018 (18)  | -0.0016 (19) | 0.0030 (17)  |
| C18 | 0.035 (3)   | 0.0170 (17) | 0.0177 (19) | -0.0022 (18) | 0.0037 (19)  | -0.0016 (16) |
| C17 | 0.019 (2)   | 0.027 (2)   | 0.022 (2)   | 0.0024 (16)  | 0.005 (2)    | 0.0017 (18)  |
| C12 | 0.040 (3)   | 0.0258 (19) | 0.0138 (17) | 0.0016 (18)  | -0.0031 (18) | -0.0033 (16) |
| N1  | 0.0185 (18) | 0.0185 (14) | 0.0108 (13) | 0.0043 (14)  | -0.0005 (13) | -0.0033 (13) |

*Geometric parameters (Å, °) for (hk041\_2\_0m\_specegroups)*

|             |           |               |           |
|-------------|-----------|---------------|-----------|
| O5—C11      | 1.201 (3) | C1—C2         | 1.389 (5) |
| O1—C6       | 1.376 (4) | C1—H1         | 0.9300    |
| O1—C10      | 1.386 (3) | C15—C14       | 1.513 (4) |
| O4—C11      | 1.346 (4) | C8—C7         | 1.336 (4) |
| O4—C12      | 1.447 (3) | C8—C10        | 1.464 (5) |
| O3—C9       | 1.220 (4) | C5—C7         | 1.436 (4) |
| O2—C10      | 1.201 (4) | C7—H7         | 0.9300    |
| C4—C3       | 1.376 (4) | C13—N1        | 1.468 (3) |
| C4—C5       | 1.397 (4) | C13—C12       | 1.521 (4) |
| C4—H4       | 0.9300    | C13—C14       | 1.526 (4) |
| C9—N1       | 1.386 (4) | C13—H13       | 0.9800    |
| C9—C8       | 1.486 (4) | C11—N1        | 1.388 (4) |
| C20—C19     | 1.390 (4) | C14—H14A      | 0.9700    |
| C20—C15     | 1.390 (4) | C14—H14B      | 0.9700    |
| C20—H20     | 0.9300    | C2—C3         | 1.385 (5) |
| C6—C1       | 1.386 (4) | C2—H2         | 0.9300    |
| C6—C5       | 1.387 (4) | C3—H3         | 0.9300    |
| C19—C18     | 1.389 (5) | C18—C17       | 1.375 (4) |
| C19—H19     | 0.9300    | C18—H18       | 0.9300    |
| C16—C15     | 1.386 (5) | C17—H17       | 0.9300    |
| C16—C17     | 1.393 (4) | C12—H12A      | 0.9700    |
| C16—H16     | 0.9300    | C12—H12B      | 0.9700    |
| C6—O1—C10   | 122.5 (2) | C12—C13—C14   | 114.2 (3) |
| C11—O4—C12  | 109.7 (3) | N1—C13—H13    | 110.1     |
| C3—C4—C5    | 120.2 (3) | C12—C13—H13   | 110.1     |
| C3—C4—H4    | 119.9     | C14—C13—H13   | 110.1     |
| C5—C4—H4    | 119.9     | O5—C11—O4     | 122.6 (3) |
| O3—C9—N1    | 119.3 (3) | O5—C11—N1     | 128.7 (3) |
| O3—C9—C8    | 122.8 (3) | O4—C11—N1     | 108.8 (3) |
| N1—C9—C8    | 117.9 (3) | C15—C14—C13   | 110.6 (2) |
| C19—C20—C15 | 120.7 (3) | C15—C14—H14A  | 109.5     |
| C19—C20—H20 | 119.7     | C13—C14—H14A  | 109.5     |
| C15—C20—H20 | 119.7     | C15—C14—H14B  | 109.5     |
| O1—C6—C1    | 116.8 (3) | C13—C14—H14B  | 109.5     |
| O1—C6—C5    | 121.5 (3) | H14A—C14—H14B | 108.1     |
| C1—C6—C5    | 121.7 (3) | C3—C2—C1      | 120.3 (3) |

|             |           |               |           |
|-------------|-----------|---------------|-----------|
| C18—C19—C20 | 119.9 (3) | C3—C2—H2      | 119.8     |
| C18—C19—H19 | 120.0     | C1—C2—H2      | 119.8     |
| C20—C19—H19 | 120.0     | C4—C3—C2      | 120.5 (3) |
| C15—C16—C17 | 120.6 (3) | C4—C3—H3      | 119.8     |
| C15—C16—H16 | 119.7     | C2—C3—H3      | 119.8     |
| C17—C16—H16 | 119.7     | O2—C10—O1     | 117.3 (3) |
| C6—C1—C2    | 118.6 (3) | O2—C10—C8     | 126.7 (3) |
| C6—C1—H1    | 120.7     | O1—C10—C8     | 116.0 (3) |
| C2—C1—H1    | 120.7     | C17—C18—C19   | 119.7 (3) |
| C16—C15—C20 | 118.7 (3) | C17—C18—H18   | 120.1     |
| C16—C15—C14 | 120.7 (3) | C19—C18—H18   | 120.1     |
| C20—C15—C14 | 120.5 (3) | C18—C17—C16   | 120.2 (3) |
| C7—C8—C10   | 121.1 (3) | C18—C17—H17   | 119.9     |
| C7—C8—C9    | 120.1 (3) | C16—C17—H17   | 119.9     |
| C10—C8—C9   | 118.7 (3) | O4—C12—C13    | 105.8 (2) |
| C6—C5—C4    | 118.6 (3) | O4—C12—H12A   | 110.6     |
| C6—C5—C7    | 117.2 (3) | C13—C12—H12A  | 110.6     |
| C4—C5—C7    | 124.1 (3) | O4—C12—H12B   | 110.6     |
| C8—C7—C5    | 121.5 (3) | C13—C12—H12B  | 110.6     |
| C8—C7—H7    | 119.2     | H12A—C12—H12B | 108.7     |
| C5—C7—H7    | 119.2     | C9—N1—C11     | 126.2 (2) |
| N1—C13—C12  | 100.1 (2) | C9—N1—C13     | 122.0 (2) |
| N1—C13—C14  | 111.8 (2) | C11—N1—C13    | 111.7 (2) |

Document origin: *publCIF* [Westrip, S. P. (2010). *J. Apply. Cryst.*, **43**, 920-925].

A 1:1 diastereomeric mixture of *syn*-HT **2BE** and **2BF**

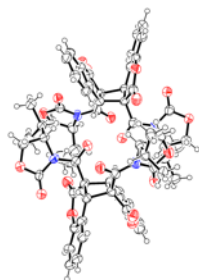

#### Crystal data

|                                 |                                                         |
|---------------------------------|---------------------------------------------------------|
| $C_{32}H_{30}N_2O_{10}$         | $D_x = 1.420 \text{ Mg m}^{-3}$                         |
| $M_r = 602.60$                  | Cu $K\alpha$ radiation, $\lambda = 1.54187 \text{ \AA}$ |
| Orthorhombic, $P2_12_12$        | Cell parameters from 21682 reflections                  |
| $a = 20.0542 (4) \text{ \AA}$   | $q = 3.6\text{--}68.2^\circ$                            |
| $b = 11.4435 (2) \text{ \AA}$   | $m = 0.89 \text{ mm}^{-1}$                              |
| $c = 12.2782 (2) \text{ \AA}$   | $T = 93 \text{ K}$                                      |
| $V = 2817.72 (9) \text{ \AA}^3$ | Block, colorless                                        |
| $Z = 4$                         | $0.20 \times 0.20 \times 0.10 \text{ mm}$               |
| $F(000) = 1264.00$              |                                                         |

#### Data collection

|                                                                |                                                              |
|----------------------------------------------------------------|--------------------------------------------------------------|
| Rigaku R-AXIS RAPID diffractometer                             | 3488 reflections with $F^2 > 2.0\sigma(F^2)$                 |
| Detector resolution: $10.000 \text{ pixels mm}^{-1}$           | $R_{\text{int}} = 0.055$                                     |
| w scans                                                        | $q_{\text{max}} = 68.2^\circ$ , $q_{\text{min}} = 3.6^\circ$ |
| Absorption correction: multi-scan <i>ABSCOR</i> (Rigaku, 1995) | $h = -23@24$                                                 |
| $T_{\text{min}} = 0.801$ , $T_{\text{max}} = 0.914$            | $k = -13@13$                                                 |
| 31475 measured reflections                                     | $l = -14@14$                                                 |
| 5177 independent reflections                                   |                                                              |

#### Refinement

|                                                                |                                                                                                                                                      |
|----------------------------------------------------------------|------------------------------------------------------------------------------------------------------------------------------------------------------|
| Refinement on $F^2$                                            | H-atom parameters constrained                                                                                                                        |
| $R[F^2 > 2s(F^2)] = 0.089$                                     | $w = 1/[s^2(F_o^2) + (0.1768P)^2]$ where $P = (F_o^2 + 2F_c^2)/3$                                                                                    |
| $wR(F^2) = 0.302$                                              | $(D/s)_{\text{max}} < 0.001$                                                                                                                         |
| $S = 1.20$                                                     | $D\rho_{\text{max}} = 0.97 \text{ e \AA}^{-3}$                                                                                                       |
| 5177 reflections                                               | $D\rho_{\text{min}} = -0.46 \text{ e \AA}^{-3}$                                                                                                      |
| 398 parameters                                                 | Extinction correction: <i>SHELXL</i>                                                                                                                 |
| 0 restraints                                                   | Extinction coefficient: $0.0064 (14)$                                                                                                                |
| Primary atom site location: structure-invariant direct methods | Absolute structure: Flack $x$ determined using 1073 quotients $[(I^+)-(I^-)]/[(I^+)+(I^-)]$ (Parsons and Flack (2004), <i>Acta Cryst.</i> A60, s61). |
| Secondary atom site location: difference Fourier map           | Absolute structure parameter: $-0.12 (8)$                                                                                                            |
| Hydrogen site location: inferred from neighbouring sites       |                                                                                                                                                      |

#### Special details

*Geometry.* ENTER SPECIAL DETAILS OF THE MOLECULAR GEOMETRY

*Refinement.* Refinement was performed using all reflections. The weighted R-factor (wR) and goodness of fit (S) are based on  $F^2$ . R-factor (gt) are based on F. The threshold expression of  $F^2 > 2.0 \text{ sigma}(F^2)$  is used only for calculating R-factor (gt).

Fractional atomic coordinates and isotropic or equivalent isotropic displacement parameters ( $\text{\AA}^2$ ) for (Ken20181211)

|      | x          | y           | z           | $U_{\text{iso}}^*/U_{\text{eq}}$ |
|------|------------|-------------|-------------|----------------------------------|
| O1   | 0.5965 (3) | 0.4448 (5)  | 0.5765 (4)  | 0.0430 (14)                      |
| O2   | 0.6693 (3) | 1.0814 (5)  | 0.1043 (5)  | 0.0464 (15)                      |
| O3   | 0.6762 (3) | 0.5385 (5)  | 0.4048 (5)  | 0.0431 (14)                      |
| O4   | 0.6039 (3) | 0.9578 (5)  | -0.0764 (4) | 0.0428 (14)                      |
| O5   | 0.6103 (3) | 0.2919 (5)  | 0.4689 (5)  | 0.0492 (15)                      |
| O6   | 0.7480 (3) | 0.4624 (5)  | 0.2830 (4)  | 0.0429 (14)                      |
| O7   | 0.5367 (3) | 0.3658 (5)  | 0.2133 (5)  | 0.0459 (15)                      |
| O8   | 0.5386 (3) | 0.8706 (5)  | 0.2819 (5)  | 0.0471 (15)                      |
| O9   | 0.7224 (3) | 1.0901 (6)  | 0.2652 (5)  | 0.0489 (16)                      |
| O35  | 0.6301 (3) | 0.8210 (5)  | 0.0408 (5)  | 0.0507 (16)                      |
| N36  | 0.6317 (3) | 0.9791 (6)  | 0.2570 (5)  | 0.0398 (16)                      |
| N37  | 0.6389 (3) | 0.4296 (7)  | 0.2557 (5)  | 0.0443 (18)                      |
| C3   | 0.6736 (4) | 1.0525 (8)  | 0.1980 (7)  | 0.0412 (19)                      |
| C4   | 0.5983 (4) | 0.9087 (7)  | 0.0247 (7)  | 0.0394 (18)                      |
| C5   | 0.5470 (4) | 0.4485 (7)  | 0.3925 (6)  | 0.0346 (17)                      |
| C6   | 0.5418 (4) | 1.1344 (8)  | -0.0212 (7) | 0.0421 (19)                      |
| C7   | 0.5794 (4) | 1.0713 (7)  | -0.0973 (7) | 0.0415 (19)                      |
| C8   | 0.5824 (4) | 0.5625 (8)  | 0.5906 (7)  | 0.0410 (19)                      |
| C9   | 0.5489 (4) | 0.9573 (7)  | 0.1036 (6)  | 0.0369 (18)                      |
| C10  | 0.5724 (4) | 0.4123 (8)  | 0.2815 (7)  | 0.0424 (19)                      |
| C11  | 0.6858 (4) | 0.4825 (8)  | 0.3224 (6)  | 0.0411 (19)                      |
| C12  | 0.5878 (4) | 0.3908 (8)  | 0.4797 (7)  | 0.0412 (19)                      |
| C13  | 0.5244 (4) | 1.2493 (7)  | -0.0506 (7) | 0.044 (2)                        |
| C14  | 0.6861 (4) | 0.8301 (7)  | 0.3753 (7)  | 0.0407 (19)                      |
| C15  | 0.5986 (5) | 1.1167 (8)  | -0.1967 (7) | 0.048 (2)                        |
| C16  | 0.5246 (4) | 1.0875 (7)  | 0.0875 (7)  | 0.0378 (18)                      |
| C17  | 0.5519 (4) | 0.6301 (7)  | 0.5125 (7)  | 0.0395 (19)                      |
| C18  | 0.6030 (4) | 0.6080 (8)  | 0.6893 (7)  | 0.048 (2)                        |
| C19  | 0.5723 (4) | 0.9319 (8)  | 0.2203 (7)  | 0.043 (2)                        |
| C20  | 0.5797 (5) | 1.2292 (9)  | -0.2237 (8) | 0.057 (3)                        |
| C21  | 0.5934 (5) | 0.7274 (9)  | 0.7125 (8)  | 0.051 (2)                        |
| C22  | 0.5418 (4) | 0.7491 (7)  | 0.5370 (7)  | 0.0414 (19)                      |
| C23  | 0.7086 (4) | 1.0532 (8)  | 0.3765 (7)  | 0.044 (2)                        |
| C24  | 0.6705 (4) | 0.3824 (9)  | 0.1573 (7)  | 0.048 (2)                        |
| C25  | 0.7381 (4) | 0.8039 (8)  | 0.2882 (8)  | 0.048 (2)                        |
| C26  | 0.5426 (4) | 1.2974 (8)  | -0.1498 (7) | 0.047 (2)                        |
| C27  | 0.6586 (4) | 0.9529 (8)  | 0.3657 (7)  | 0.0418 (19)                      |
| C28  | 0.5620 (4) | 0.7955 (9)  | 0.6351 (7)  | 0.051 (2)                        |
| C29  | 0.7429 (4) | 0.3770 (9)  | 0.1948 (7)  | 0.048 (2)                        |
| C30  | 0.7146 (5) | 0.8114 (9)  | 0.4894 (7)  | 0.051 (2)                        |
| C31  | 0.6916 (5) | 0.3955 (13) | -0.0406 (8) | 0.077 (4)                        |
| C32  | 0.6600 (5) | 0.4553 (12) | 0.0569 (8)  | 0.066 (3)                        |
| C33  | 0.6822 (8) | 0.5720 (13) | 0.0670 (11) | 0.103 (5)                        |
| C38  | 0.5313 (4) | 0.5809 (7)  | 0.4058 (6)  | 0.0386 (18)                      |
| H13  | 0.49937    | 1.29529     | -0.00083    | 0.0528*                          |
| H14  | 0.64831    | 0.77418     | 0.36534     | 0.0488*                          |
| H15  | 0.62437    | 1.07126     | -0.24588    | 0.0570*                          |
| H16  | 0.53944    | 1.14007     | 0.14786     | 0.0454*                          |
| H18  | 0.6237     | 0.55876     | 0.74153     | 0.0571*                          |
| H20  | 0.59176    | 1.26071     | -0.29251    | 0.0686*                          |
| H21  | 0.60806    | 0.76004     | 0.77949     | 0.0617*                          |
| H22  | 0.52081    | 0.79821     | 0.48492     | 0.0496*                          |
| H23A | 0.68921    | 1.11821     | 0.41924     | 0.0522*                          |
| H23B | 0.74984    | 1.02622     | 0.41289     | 0.0522*                          |



|      |         |         |          |         |
|------|---------|---------|----------|---------|
| H24  | 0.65379 | 0.30132 | 0.14392  | 0.0581* |
| H25A | 0.75458 | 0.72388 | 0.29738  | 0.0578* |
| H25B | 0.71785 | 0.8121  | 0.21596  | 0.0578* |
| H25C | 0.77533 | 0.85889 | 0.29517  | 0.0578* |
| H26  | 0.53022 | 1.37519 | -0.16776 | 0.0569* |
| H27  | 0.62243 | 0.96355 | 0.42085  | 0.0502* |
| H28  | 0.55418 | 0.87589 | 0.64986  | 0.0610* |
| H29A | 0.75413 | 0.29775 | 0.2213   | 0.0571* |
| H29B | 0.7734  | 0.39753 | 0.1344   | 0.0571* |
| H30A | 0.7324  | 0.7319  | 0.49534  | 0.0608* |
| H30B | 0.75049 | 0.86788 | 0.50259  | 0.0608* |
| H30C | 0.67929 | 0.82255 | 0.54358  | 0.0608* |
| H31A | 0.67535 | 0.31489 | -0.04547 | 0.0921* |
| H31B | 0.67977 | 0.43783 | -0.10717 | 0.0921* |
| H31C | 0.74022 | 0.39506 | -0.03199 | 0.0921* |
| H32  | 0.61083 | 0.45814 | 0.04326  | 0.0798* |
| H33A | 0.6737  | 0.61395 | -0.00125 | 0.1232* |
| H33B | 0.65815 | 0.61041 | 0.12654  | 0.1232* |
| H33C | 0.73011 | 0.57269 | 0.08254  | 0.1232* |
| H38  | 0.54868 | 0.62811 | 0.34344  | 0.0463* |

Atomic displacement parameters ( $\text{\AA}^2$ ) for (Ken20181211)

|     | $U^{11}$  | $U^{22}$  | $U^{33}$  | $U^{12}$   | $U^{13}$   | $U^{23}$   |
|-----|-----------|-----------|-----------|------------|------------|------------|
| O1  | 0.041 (3) | 0.051 (4) | 0.037 (3) | -0.003 (3) | -0.006 (3) | 0.002 (3)  |
| O2  | 0.038 (3) | 0.054 (3) | 0.047 (3) | -0.005 (3) | -0.004 (3) | 0.010 (3)  |
| O3  | 0.037 (3) | 0.049 (3) | 0.043 (3) | -0.001 (3) | 0.001 (3)  | -0.001 (3) |
| O4  | 0.044 (3) | 0.044 (3) | 0.041 (3) | 0.005 (3)  | 0.001 (3)  | 0.001 (3)  |
| O5  | 0.041 (3) | 0.048 (3) | 0.058 (4) | 0.004 (3)  | 0.000 (3)  | 0.006 (3)  |
| O6  | 0.034 (3) | 0.052 (3) | 0.043 (3) | -0.002 (3) | 0.005 (2)  | -0.007 (3) |
| O7  | 0.042 (3) | 0.052 (4) | 0.044 (3) | -0.005 (3) | 0.002 (3)  | -0.010 (3) |
| O8  | 0.038 (3) | 0.056 (4) | 0.048 (3) | -0.010 (3) | 0.000 (3)  | 0.008 (3)  |
| O9  | 0.041 (3) | 0.057 (4) | 0.049 (3) | -0.011 (3) | -0.004 (3) | 0.010 (3)  |
| O35 | 0.044 (3) | 0.049 (4) | 0.060 (4) | 0.006 (3)  | 0.005 (3)  | 0.002 (3)  |
| N36 | 0.037 (4) | 0.044 (4) | 0.038 (4) | -0.001 (3) | -0.010 (3) | 0.008 (3)  |
| N37 | 0.033 (4) | 0.064 (5) | 0.036 (4) | -0.005 (3) | 0.002 (3)  | -0.011 (4) |
| C3  | 0.029 (4) | 0.047 (5) | 0.047 (5) | -0.007 (4) | -0.011 (4) | 0.003 (4)  |
| C4  | 0.034 (4) | 0.040 (4) | 0.044 (4) | -0.003 (4) | 0.000 (4)  | 0.000 (4)  |
| C5  | 0.033 (4) | 0.040 (4) | 0.031 (4) | 0.008 (3)  | 0.002 (3)  | -0.001 (3) |
| C6  | 0.043 (4) | 0.048 (5) | 0.036 (4) | 0.003 (4)  | -0.005 (4) | -0.002 (4) |
| C7  | 0.044 (5) | 0.040 (4) | 0.041 (4) | -0.001 (4) | -0.001 (4) | 0.003 (4)  |
| C8  | 0.035 (4) | 0.049 (5) | 0.039 (4) | 0.000 (4)  | -0.001 (3) | 0.004 (4)  |
| C9  | 0.033 (4) | 0.044 (4) | 0.034 (4) | 0.003 (4)  | -0.005 (3) | -0.002 (3) |
| C10 | 0.037 (4) | 0.045 (5) | 0.044 (4) | -0.004 (4) | 0.006 (4)  | -0.001 (4) |
| C11 | 0.038 (4) | 0.048 (5) | 0.037 (4) | 0.002 (4)  | 0.001 (4)  | 0.006 (4)  |
| C12 | 0.037 (4) | 0.044 (5) | 0.042 (5) | -0.003 (4) | 0.000 (4)  | 0.002 (4)  |
| C13 | 0.041 (5) | 0.039 (5) | 0.051 (5) | -0.001 (4) | -0.009 (4) | 0.006 (4)  |
| C14 | 0.037 (4) | 0.042 (5) | 0.043 (5) | -0.002 (4) | -0.008 (4) | 0.006 (4)  |
| C15 | 0.048 (5) | 0.057 (5) | 0.038 (4) | -0.001 (4) | 0.002 (4)  | 0.006 (4)  |
| C16 | 0.032 (4) | 0.037 (4) | 0.044 (4) | 0.002 (3)  | -0.003 (3) | 0.006 (4)  |
| C17 | 0.037 (4) | 0.040 (4) | 0.042 (4) | -0.001 (4) | 0.002 (4)  | 0.000 (4)  |
| C18 | 0.042 (5) | 0.067 (6) | 0.034 (4) | -0.003 (4) | 0.001 (4)  | 0.000 (4)  |
| C19 | 0.036 (4) | 0.056 (5) | 0.038 (4) | -0.001 (4) | -0.004 (4) | 0.003 (4)  |
| C20 | 0.058 (6) | 0.072 (7) | 0.041 (5) | -0.015 (5) | -0.014 (4) | 0.015 (5)  |

|     |            |            |           |            |            |            |
|-----|------------|------------|-----------|------------|------------|------------|
| C21 | 0.041 (5)  | 0.070 (6)  | 0.044 (5) | -0.005 (4) | -0.006 (4) | -0.010 (5) |
| C22 | 0.038 (4)  | 0.046 (5)  | 0.040 (4) | -0.005 (4) | -0.003 (4) | -0.007 (4) |
| C23 | 0.041 (5)  | 0.045 (5)  | 0.045 (5) | 0.001 (4)  | -0.009 (4) | 0.004 (4)  |
| C24 | 0.045 (5)  | 0.059 (6)  | 0.042 (5) | -0.004 (4) | 0.011 (4)  | -0.013 (4) |
| C25 | 0.036 (4)  | 0.048 (5)  | 0.061 (6) | 0.002 (4)  | 0.009 (4)  | 0.007 (4)  |
| C26 | 0.044 (5)  | 0.048 (5)  | 0.050 (5) | -0.001 (4) | -0.009 (4) | 0.012 (4)  |
| C27 | 0.044 (5)  | 0.046 (5)  | 0.035 (4) | -0.001 (4) | -0.008 (4) | 0.006 (4)  |
| C28 | 0.045 (5)  | 0.059 (6)  | 0.048 (5) | -0.006 (4) | 0.004 (4)  | -0.013 (5) |
| C29 | 0.043 (5)  | 0.050 (5)  | 0.049 (5) | 0.002 (4)  | 0.005 (4)  | -0.011 (4) |
| C30 | 0.041 (5)  | 0.060 (6)  | 0.051 (5) | -0.001 (4) | -0.011 (4) | 0.009 (5)  |
| C31 | 0.055 (6)  | 0.137 (11) | 0.039 (5) | 0.009 (7)  | 0.003 (5)  | -0.020 (6) |
| C32 | 0.058 (6)  | 0.096 (9)  | 0.045 (5) | 0.022 (6)  | 0.006 (5)  | -0.002 (6) |
| C33 | 0.145 (14) | 0.084 (10) | 0.079 (9) | 0.017 (10) | 0.027 (9)  | 0.008 (8)  |
| C38 | 0.040 (4)  | 0.039 (4)  | 0.037 (4) | -0.004 (4) | 0.003 (3)  | -0.005 (4) |

*Geometric parameters (Å, °) for (Ken20181211)*

|                      |            |          |            |
|----------------------|------------|----------|------------|
| O1—C8                | 1.387 (10) | C17—C38  | 1.483 (11) |
| O1—C12               | 1.351 (10) | C18—C21  | 1.408 (14) |
| O2—C3                | 1.201 (10) | C20—C26  | 1.409 (14) |
| O3—C11               | 1.214 (10) | C21—C28  | 1.381 (13) |
| O4—C4                | 1.368 (10) | C22—C28  | 1.378 (12) |
| O4—C7                | 1.412 (10) | C23—C27  | 1.529 (12) |
| O5—C12               | 1.225 (10) | C24—C29  | 1.523 (12) |
| O6—C11               | 1.357 (10) | C24—C32  | 1.504 (14) |
| O6—C29               | 1.462 (11) | C31—C32  | 1.518 (15) |
| O7—C10               | 1.223 (10) | C32—C33  | 1.41 (2)   |
| O8—C19               | 1.233 (10) | C13—H13  | 0.950      |
| O9—C3                | 1.351 (10) | C14—H14  | 1.000      |
| O9—C23               | 1.457 (10) | C15—H15  | 0.950      |
| O35—C4               | 1.205 (10) | C16—H16  | 1.000      |
| N36—C3               | 1.390 (11) | C18—H18  | 0.950      |
| N36—C19              | 1.384 (11) | C20—H20  | 0.950      |
| N36—C27              | 1.470 (10) | C21—H21  | 0.950      |
| N37—C10              | 1.385 (11) | C22—H22  | 0.950      |
| N37—C11              | 1.386 (11) | C23—H23A | 0.990      |
| N37—C24              | 1.468 (11) | C23—H23B | 0.990      |
| C4—C9                | 1.493 (11) | C24—H24  | 1.000      |
| C5—C10               | 1.513 (11) | C25—H25A | 0.980      |
| C5—C12               | 1.501 (11) | C25—H25B | 0.980      |
| C5—C38               | 1.557 (11) | C25—H25C | 0.980      |
| C5—C38 <sup>i</sup>  | 1.614 (11) | C26—H26  | 0.950      |
| C6—C7                | 1.402 (12) | C27—H27  | 1.000      |
| C6—C13               | 1.406 (12) | C28—H28  | 0.950      |
| C6—C16               | 1.479 (12) | C29—H29A | 0.990      |
| C7—C15               | 1.382 (12) | C29—H29B | 0.990      |
| C8—C17               | 1.377 (12) | C30—H30A | 0.980      |
| C8—C18               | 1.381 (12) | C30—H30B | 0.980      |
| C9—C16               | 1.581 (11) | C30—H30C | 0.980      |
| C9—C16 <sup>ii</sup> | 1.574 (11) | C31—H31A | 0.980      |
| C9—C19               | 1.536 (11) | C31—H31B | 0.980      |
| C13—C26              | 1.386 (12) | C31—H31C | 0.980      |
| C14—C25              | 1.523 (12) | C32—H32  | 1.000      |

|                      |            |                        |        |
|----------------------|------------|------------------------|--------|
| C14—C27              | 1.515 (12) | C33—H33A               | 0.980  |
| C14—C30              | 1.528 (12) | C33—H33B               | 0.980  |
| C15—C20              | 1.382 (14) | C33—H33C               | 0.980  |
| C17—C22              | 1.410 (11) | C38—H38                | 1.000  |
|                      |            |                        |        |
| O1…O3                | 2.854 (8)  | H31A…H33C              | 3.5185 |
| O1…C8 <sup>i</sup>   | 3.594 (10) | H31B…H32               | 2.3188 |
| O1…C17 <sup>i</sup>  | 3.194 (10) | H31B…H33A              | 2.4017 |
| O1…C22 <sup>i</sup>  | 3.585 (10) | H31B…H33B              | 3.5103 |
| O1…C38               | 2.921 (10) | H31B…H33C              | 2.9709 |
| O1…C38 <sup>i</sup>  | 3.323 (10) | H31C…H32               | 2.8474 |
| O2…O4                | 2.940 (8)  | H31C…H33A              | 2.8629 |
| O2…O35               | 3.179 (9)  | H31C…H33B              | 3.5455 |
| O2…C4                | 2.625 (10) | H31C…H33C              | 2.4800 |
| O2…C6                | 3.048 (10) | H32…H33A               | 2.2511 |
| O2…C7                | 3.065 (10) | H32…H33B               | 2.2321 |
| O2…C9                | 2.801 (10) | H32…H33C               | 2.7700 |
| O2…C16               | 2.911 (9)  | H33B…H38               | 3.4573 |
| O2…C19               | 2.957 (10) | H38…H38 <sup>i</sup>   | 3.5227 |
| O2…C23               | 3.449 (10) | O1…H20 <sup>iii</sup>  | 2.6519 |
| O2…C27               | 3.537 (10) | O1…H23B <sup>vi</sup>  | 3.2220 |
| O3…O5                | 3.214 (8)  | O1…H25C <sup>vi</sup>  | 3.1709 |
| O3…C5                | 2.792 (9)  | O1…H26 <sup>iii</sup>  | 3.5013 |
| O3…C8                | 2.968 (10) | O1…H30B <sup>vi</sup>  | 3.3367 |
| O3…C10               | 2.951 (10) | O2…H24 <sup>iv</sup>   | 2.5824 |
| O3…C12               | 2.617 (10) | O2…H29A <sup>iv</sup>  | 3.3299 |
| O3…C17               | 3.010 (10) | O2…H31A <sup>iv</sup>  | 3.2457 |
| O3…C24               | 3.527 (10) | O2…H31B <sup>v</sup>   | 3.4435 |
| O3…C29               | 3.443 (10) | O2…H31C <sup>v</sup>   | 2.9366 |
| O3…C38               | 2.946 (10) | O2…H33A <sup>v</sup>   | 3.4129 |
| O4…C6 <sup>ii</sup>  | 3.179 (10) | O2…H33C <sup>v</sup>   | 3.0556 |
| O4…C13 <sup>ii</sup> | 3.511 (10) | O3…H14                 | 2.7963 |
| O4…C16               | 2.964 (10) | O3…H23A <sup>vi</sup>  | 3.5762 |
| O4…C16 <sup>ii</sup> | 3.310 (9)  | O3…H23B <sup>vi</sup>  | 2.6894 |
| O5…O7                | 3.569 (8)  | O3…H25A                | 2.9518 |
| O5…N37               | 3.109 (9)  | O3…H30A                | 2.7212 |
| O5…C8                | 3.483 (10) | O3…H30B <sup>vi</sup>  | 2.6963 |
| O5…C10               | 2.787 (11) | O4…H21 <sup>xiii</sup> | 2.8733 |
| O5…C11               | 3.207 (10) | O4…H29B <sup>v</sup>   | 2.6528 |
| O5…C17 <sup>i</sup>  | 3.414 (10) | O4…H31C <sup>v</sup>   | 3.4729 |
| O5…C22 <sup>i</sup>  | 3.198 (10) | O4…H33C <sup>v</sup>   | 3.5801 |
| O5…C38 <sup>i</sup>  | 3.282 (10) | O5…H20 <sup>iii</sup>  | 2.9748 |
| O6…C10               | 3.568 (10) | O5…H23A <sup>vii</sup> | 2.6132 |
| O6…C32               | 3.291 (11) | O5…H30A <sup>vi</sup>  | 3.2590 |
| O6…C33               | 3.217 (15) | O5…H30B <sup>vi</sup>  | 2.9457 |
| O7…O7 <sup>i</sup>   | 3.406 (8)  | O6…H15 <sup>xii</sup>  | 2.8829 |
| O7…C5 <sup>i</sup>   | 3.489 (9)  | O6…H25A                | 2.9999 |
| O7…C10 <sup>i</sup>  | 3.455 (10) | O6…H30B <sup>vi</sup>  | 2.8462 |
| O7…C11               | 3.537 (10) | O6…H30C <sup>vi</sup>  | 3.0368 |
| O7…C12               | 3.439 (10) | O7…H13 <sup>viii</sup> | 2.8504 |
| O7…C24               | 2.776 (10) | O7…H16 <sup>vii</sup>  | 2.7060 |
| O7…C32               | 3.293 (12) | O8…H22                 | 2.6511 |

|                         |            |                           |        |
|-------------------------|------------|---------------------------|--------|
| O7...C38                | 3.415 (10) | O8...H38                  | 2.8828 |
| O7...C38 <sup>I</sup>   | 2.796 (10) | O9...H18 <sup>viii</sup>  | 3.1074 |
| O8...O8 <sup>ii</sup>   | 3.342 (8)  | O9...H24 <sup>iv</sup>    | 3.1551 |
| O8...O35                | 3.528 (9)  | O9...H29A <sup>iv</sup>   | 2.5181 |
| O8...C3                 | 3.567 (10) | O9...H30A <sup>viii</sup> | 3.4783 |
| O8...C4                 | 3.405 (10) | O9...H31B <sup>v</sup>    | 3.2629 |
| O8...C9 <sup>ii</sup>   | 3.428 (10) | O35...H21 <sup>xiii</sup> | 3.3132 |
| O8...C14                | 3.207 (10) | O35...H29B <sup>v</sup>   | 3.0235 |
| O8...C16                | 3.456 (10) | O35...H31C <sup>v</sup>   | 2.7377 |
| O8...C16 <sup>ii</sup>  | 2.745 (10) | O35...H33A                | 2.5782 |
| O8...C19 <sup>ii</sup>  | 3.260 (10) | O35...H33B                | 2.6895 |
| O8...C27                | 2.782 (10) | O35...H33C                | 3.5160 |
| O9...C14                | 3.349 (10) | C3...H24 <sup>iv</sup>    | 2.9504 |
| O9...C19                | 3.556 (10) | C3...H29A <sup>iv</sup>   | 3.2506 |
| O9...C25                | 3.302 (11) | C3...H31B <sup>v</sup>    | 3.4083 |
| O35...N36               | 3.212 (9)  | C3...H31C <sup>v</sup>    | 3.2236 |
| O35...C3                | 3.392 (11) | C4...H21 <sup>xiii</sup>  | 3.4633 |
| O35...C6 <sup>ii</sup>  | 3.566 (10) | C4...H29B <sup>v</sup>    | 3.2328 |
| O35...C7                | 3.480 (10) | C4...H31C <sup>v</sup>    | 3.2431 |
| O35...C13 <sup>ii</sup> | 3.391 (10) | C6...H24 <sup>iv</sup>    | 3.5786 |
| O35...C16 <sup>ii</sup> | 3.323 (10) | C6...H31A <sup>iv</sup>   | 3.3956 |
| O35...C19               | 2.794 (11) | C7...H29B <sup>v</sup>    | 3.5885 |
| N36...C4                | 3.039 (10) | C7...H31A <sup>iv</sup>   | 3.4473 |
| N36...C16               | 3.239 (10) | C8...H23B <sup>vi</sup>   | 3.3893 |
| N36...C25               | 2.953 (11) | C10...H16 <sup>vii</sup>  | 3.5825 |
| N37...C12               | 2.969 (11) | C11...H14                 | 3.4623 |
| N37...C33               | 2.963 (16) | C11...H23B <sup>vi</sup>  | 3.5328 |
| N37...C38               | 3.324 (11) | C11...H25A                | 3.1030 |
| C3...C4                 | 3.085 (12) | C11...H30B <sup>vi</sup>  | 2.8229 |
| C3...C9                 | 2.963 (11) | C12...H20 <sup>iii</sup>  | 3.1691 |
| C3...C14                | 3.359 (12) | C12...H30B <sup>vi</sup>  | 3.2616 |
| C3...C16                | 3.306 (11) | C13...H21 <sup>x</sup>    | 3.3790 |
| C3...C25                | 3.316 (13) | C13...H24 <sup>iv</sup>   | 3.5769 |
| C4...C6                 | 2.877 (12) | C13...H31A <sup>iv</sup>  | 3.1200 |
| C4...C6 <sup>ii</sup>   | 2.907 (12) | C13...H32 <sup>iv</sup>   | 3.1698 |
| C4...C9 <sup>ii</sup>   | 3.465 (11) | C14...H22                 | 3.5967 |
| C4...C13 <sup>ii</sup>  | 3.190 (11) | C15...H25A <sup>v</sup>   | 3.4215 |
| C5...C8                 | 2.850 (11) | C15...H28 <sup>xiii</sup> | 3.4544 |
| C5...C8 <sup>I</sup>    | 3.560 (11) | C15...H28 <sup>x</sup>    | 3.5967 |
| C5...C10 <sup>I</sup>   | 3.182 (11) | C15...H31A <sup>iv</sup>  | 3.3114 |
| C5...C11                | 2.940 (11) | C17...H14                 | 3.1183 |
| C5...C12 <sup>I</sup>   | 3.440 (11) | C17...H30C                | 3.3953 |
| C5...C22 <sup>I</sup>   | 3.381 (11) | C18...H23B <sup>vi</sup>  | 3.3405 |
| C6...C6 <sup>ii</sup>   | 3.503 (12) | C18...H26 <sup>iii</sup>  | 3.5090 |
| C6...C7 <sup>ii</sup>   | 3.509 (12) | C18...H26 <sup>xi</sup>   | 3.2026 |
| C6...C16 <sup>ii</sup>  | 3.163 (12) | C18...H30C                | 3.4007 |
| C6...C20                | 2.817 (13) | C18...H31B <sup>xiv</sup> | 3.5231 |
| C7...C7 <sup>ii</sup>   | 3.577 (12) | C20...H25A <sup>v</sup>   | 3.4456 |
| C7...C9                 | 2.856 (11) | C20...H25C <sup>v</sup>   | 3.3808 |
| C7...C9 <sup>ii</sup>   | 3.579 (11) | C20...H28 <sup>x</sup>    | 3.3255 |
| C7...C16 <sup>ii</sup>  | 3.577 (11) | C20...H31A <sup>iv</sup>  | 3.0716 |
| C7...C26                | 2.767 (12) | C20...H31B <sup>iv</sup>  | 3.4321 |

|                          |            |                            |        |
|--------------------------|------------|----------------------------|--------|
| C8...C28                 | 2.753 (13) | C21...H26 <sup>xi</sup>    | 3.1118 |
| C9...C13 <sup>ii</sup>   | 3.366 (11) | C21...H29A <sup>viii</sup> | 3.2650 |
| C9...C19 <sup>ii</sup>   | 3.094 (11) | C21...H30C                 | 2.9080 |
| C10...C10 <sup>i</sup>   | 3.529 (12) | C22...H14                  | 3.0139 |
| C10...C32                | 3.306 (13) | C22...H20 <sup>xi</sup>    | 3.4019 |
| C11...C12                | 2.949 (12) | C22...H27                  | 3.2661 |
| C11...C32                | 3.315 (13) | C22...H30C                 | 2.8829 |
| C11...C33                | 3.300 (16) | C23...H29A <sup>iv</sup>   | 3.5074 |
| C11...C38                | 3.453 (11) | C23...H30A <sup>viii</sup> | 2.8395 |
| C12...C17                | 2.860 (12) | C25...H20 <sup>xii</sup>   | 3.4478 |
| C12...C17 <sup>i</sup>   | 2.839 (11) | C25...H31A <sup>v</sup>    | 3.4510 |
| C12...C18                | 3.591 (12) | C25...H31B <sup>v</sup>    | 3.1624 |
| C12...C22 <sup>i</sup>   | 3.132 (12) | C25...H31C <sup>v</sup>    | 3.3425 |
| C13...C15                | 2.781 (12) | C25...H33B                 | 3.3784 |
| C14...C19                | 3.192 (12) | C26...H21 <sup>x</sup>     | 3.2109 |
| C17...C21                | 2.823 (12) | C26...H31A <sup>iv</sup>   | 2.9618 |
| C17...C38 <sup>i</sup>   | 3.213 (11) | C26...H31B <sup>iv</sup>   | 3.2292 |
| C18...C22                | 2.758 (12) | C26...H32 <sup>iv</sup>    | 3.2983 |
| C19...C19 <sup>ii</sup>  | 3.293 (12) | C27...H22                  | 3.5933 |
| C23...C25                | 3.108 (13) | C28...H20 <sup>xi</sup>    | 3.2729 |
| C23...C30                | 3.097 (13) | C28...H27                  | 3.4768 |
| C29...C31                | 3.075 (13) | C28...H30C                 | 2.6253 |
| C29...C33                | 2.987 (17) | C29...H15 <sup>xii</sup>   | 3.5244 |
| O1...C20 <sup>iii</sup>  | 3.495 (11) | C29...H21 <sup>vi</sup>    | 3.2908 |
| O2...C24 <sup>iv</sup>   | 3.506 (12) | C30...H23A <sup>vi</sup>   | 3.1409 |
| O2...C31 <sup>v</sup>    | 3.593 (13) | C30...H23B <sup>vi</sup>   | 3.5494 |
| O3...C14                 | 3.362 (10) | C31...H18 <sup>xiii</sup>  | 3.5364 |
| O3...C23 <sup>vi</sup>   | 3.547 (10) | C31...H25B <sup>xii</sup>  | 2.9737 |
| O3...C25                 | 3.580 (11) | C31...H25C <sup>xii</sup>  | 3.2228 |
| O3...C30                 | 3.381 (12) | C33...H25B                 | 3.3771 |
| O4...C29 <sup>v</sup>    | 3.523 (10) | C38...H14                  | 3.2627 |
| O5...C23 <sup>vii</sup>  | 3.555 (11) | H13...O7 <sup>iv</sup>     | 2.8504 |
| O5...C30 <sup>vi</sup>   | 3.556 (11) | H13...H21 <sup>x</sup>     | 3.5097 |
| O6...C30 <sup>vi</sup>   | 3.369 (11) | H13...H24 <sup>iv</sup>    | 3.5712 |
| O7...O8 <sup>i</sup>     | 3.211 (8)  | H13...H31A <sup>iv</sup>   | 3.5785 |
| O7...C13 <sup>vii</sup>  | 3.513 (10) | H13...H32 <sup>iv</sup>    | 2.9601 |
| O7...C16 <sup>vii</sup>  | 3.548 (10) | H14...O3                   | 2.7963 |
| O8...O7 <sup>i</sup>     | 3.211 (8)  | H14...C11                  | 3.4623 |
| O8...C22                 | 3.428 (10) | H14...C17                  | 3.1183 |
| O9...C18 <sup>viii</sup> | 3.551 (10) | H14...C22                  | 3.0139 |
| O9...C29 <sup>iv</sup>   | 3.420 (12) | H14...C38                  | 3.2627 |
| O35...C33                | 3.052 (16) | H14...H22                  | 2.9613 |
| C13...O7 <sup>iv</sup>   | 3.513 (10) | H14...H33B                 | 3.4854 |
| C14...O3                 | 3.362 (10) | H14...H38                  | 2.6189 |
| C16...O7 <sup>iv</sup>   | 3.548 (10) | H15...O6 <sup>v</sup>      | 2.8829 |
| C18...O9 <sup>vi</sup>   | 3.551 (10) | H15...C29 <sup>v</sup>     | 3.5244 |
| C20...O1 <sup>ix</sup>   | 3.495 (11) | H15...H21 <sup>xiii</sup>  | 3.5900 |
| C20...C21 <sup>x</sup>   | 3.592 (14) | H15...H25A <sup>v</sup>    | 3.0567 |
| C20...C28 <sup>x</sup>   | 3.340 (13) | H15...H28 <sup>xiii</sup>  | 2.9357 |
| C21...C20 <sup>xi</sup>  | 3.592 (14) | H15...H29B <sup>v</sup>    | 3.1669 |
| C21...C26 <sup>xi</sup>  | 3.220 (13) | H15...H33C <sup>v</sup>    | 3.5410 |
| C22...O8                 | 3.428 (10) | H16...O7 <sup>iv</sup>     | 2.7060 |

|                          |            |                             |        |
|--------------------------|------------|-----------------------------|--------|
| C22...C30                | 3.586 (12) | H16...C10 <sup>IV</sup>     | 3.5825 |
| C23...O3 <sup>VIII</sup> | 3.547 (10) | H16...H24 <sup>IV</sup>     | 2.9438 |
| C23...O5 <sup>IV</sup>   | 3.555 (11) | H18...O9 <sup>VI</sup>      | 3.1074 |
| C24...O2 <sup>VII</sup>  | 3.506 (12) | H18...C31 <sup>XIV</sup>    | 3.5364 |
| C25...O3                 | 3.580 (11) | H18...H20 <sup>III</sup>    | 3.4954 |
| C25...C31 <sup>V</sup>   | 3.511 (14) | H18...H23B <sup>VI</sup>    | 3.1883 |
| C26...C21 <sup>X</sup>   | 3.220 (13) | H18...H25C <sup>VI</sup>    | 3.0878 |
| C26...C28 <sup>X</sup>   | 3.535 (13) | H18...H26 <sup>III</sup>    | 3.0278 |
| C26...C31 <sup>IV</sup>  | 3.463 (14) | H18...H26 <sup>XI</sup>     | 3.3675 |
| C28...C20 <sup>XI</sup>  | 3.340 (13) | H18...H31B <sup>XIV</sup>   | 2.5750 |
| C28...C26 <sup>XI</sup>  | 3.535 (13) | H18...H33A <sup>XIV</sup>   | 3.3732 |
| C28...C30                | 3.550 (13) | H20...O1 <sup>IX</sup>      | 2.6519 |
| C29...O4 <sup>XII</sup>  | 3.523 (10) | H20...O5 <sup>IX</sup>      | 2.9748 |
| C29...O9 <sup>VII</sup>  | 3.420 (12) | H20...C12 <sup>IX</sup>     | 3.1691 |
| C30...O3                 | 3.381 (12) | H20...C22 <sup>X</sup>      | 3.4019 |
| C30...O5 <sup>VIII</sup> | 3.556 (11) | H20...C25 <sup>V</sup>      | 3.4478 |
| C30...O6 <sup>VIII</sup> | 3.369 (11) | H20...C28 <sup>X</sup>      | 3.2729 |
| C30...C22                | 3.586 (12) | H20...H18 <sup>IX</sup>     | 3.4954 |
| C30...C28                | 3.550 (13) | H20...H25A <sup>V</sup>     | 3.1108 |
| C31...O2 <sup>XII</sup>  | 3.593 (13) | H20...H25C <sup>V</sup>     | 2.8927 |
| C31...C25 <sup>XII</sup> | 3.511 (14) | H20...H28 <sup>X</sup>      | 3.3926 |
| C31...C26 <sup>VII</sup> | 3.463 (14) | H20...H31A <sup>IV</sup>    | 3.5206 |
| C33...O35                | 3.052 (16) | H20...H31B <sup>IV</sup>    | 3.5216 |
| O1...H18                 | 2.4705     | H21...O4 <sup>XIV</sup>     | 2.8733 |
| O2...H16                 | 2.7428     | H21...O35 <sup>XIV</sup>    | 3.3132 |
| O2...H25B                | 3.5105     | H21...C4 <sup>XIV</sup>     | 3.4633 |
| O3...H33B                | 3.5328     | H21...C13 <sup>XI</sup>     | 3.3790 |
| O3...H38                 | 2.8554     | H21...C26 <sup>XI</sup>     | 3.2109 |
| O4...H15                 | 2.4867     | H21...C29 <sup>VIII</sup>   | 3.2908 |
| O5...H22 <sup>I</sup>    | 2.8304     | H21...H13 <sup>XI</sup>     | 3.5097 |
| O6...H24                 | 3.1441     | H21...H15 <sup>XIV</sup>    | 3.5900 |
| O6...H33B                | 3.1312     | H21...H26 <sup>XI</sup>     | 3.2410 |
| O6...H33C                | 2.7892     | H21...H29A <sup>VIII</sup>  | 2.7972 |
| O7...H24                 | 2.6041     | H21...H29B <sup>VIII</sup>  | 3.0405 |
| O7...H32                 | 2.7719     | H21...H30C                  | 3.3079 |
| O7...H38                 | 3.4088     | H21...H33A <sup>XIV</sup>   | 3.4315 |
| O7...H38 <sup>I</sup>    | 2.3435     | H22...O8                    | 2.6511 |
| O8...H14                 | 2.6662     | H22...C14                   | 3.5967 |
| O8...H16                 | 3.4955     | H22...C27                   | 3.5933 |
| O8...H16 <sup>II</sup>   | 2.2740     | H22...H14                   | 2.9613 |
| O8...H27                 | 2.6212     | H22...H27                   | 2.8900 |
| O9...H25B                | 3.2395     | H22...H30C                  | 3.2707 |
| O9...H25C                | 2.8742     | H23A...O3 <sup>VIII</sup>   | 3.5762 |
| O9...H27                 | 3.1261     | H23A...O5 <sup>IV</sup>     | 2.6132 |
| O35...H13 <sup>II</sup>  | 2.9618     | H23A...C30 <sup>VIII</sup>  | 3.1409 |
| O35...H25B               | 2.7808     | H23A...H29A <sup>IV</sup>   | 3.4384 |
| N36...H14                | 2.7169     | H23A...H30A <sup>VIII</sup> | 2.2943 |
| N36...H16                | 2.9348     | H23A...H30B <sup>VIII</sup> | 3.2475 |
| N36...H23A               | 2.7981     | H23A...H30C <sup>VIII</sup> | 3.5540 |
| N36...H23B               | 3.0925     | H23B...O1 <sup>VIII</sup>   | 3.2220 |
| N36...H25B               | 2.6248     | H23B...O3 <sup>VIII</sup>   | 2.6894 |
| N36...H25C               | 3.2257     | H23B...C8 <sup>VIII</sup>   | 3.3893 |

|                         |        |                             |        |
|-------------------------|--------|-----------------------------|--------|
| N37...H29A              | 2.7925 | H23B...C11 <sup>viii</sup>  | 3.5328 |
| N37...H29B              | 3.1033 | H23B...C18 <sup>viii</sup>  | 3.3405 |
| N37...H32               | 2.6881 | H23B...C30 <sup>viii</sup>  | 3.5494 |
| N37...H33B              | 2.6350 | H23B...H18 <sup>viii</sup>  | 3.1883 |
| N37...H33C              | 3.2476 | H23B...H30A <sup>viii</sup> | 2.6337 |
| N37...H38               | 3.0970 | H24...O2 <sup>vii</sup>     | 2.5824 |
| C3...H16                | 2.9359 | H24...O9 <sup>vii</sup>     | 3.1551 |
| C3...H23A               | 2.8355 | H24...C3 <sup>vii</sup>     | 2.9504 |
| C3...H23B               | 3.0641 | H24...C6 <sup>vii</sup>     | 3.5786 |
| C3...H25B               | 2.8993 | H24...C13 <sup>vii</sup>    | 3.5769 |
| C3...H25C               | 3.2398 | H24...H13 <sup>vii</sup>    | 3.5712 |
| C3...H27                | 3.0941 | H24...H16 <sup>vii</sup>    | 2.9438 |
| C4...H13 <sup>ii</sup>  | 3.0631 | H25A...O3                   | 2.9518 |
| C4...H16                | 3.2701 | H25A...O6                   | 2.9999 |
| C4...H16 <sup>ii</sup>  | 3.1983 | H25A...C11                  | 3.1030 |
| C4...H25B               | 3.5332 | H25A...C15 <sup>xii</sup>   | 3.4215 |
| C5...H22 <sup>i</sup>   | 3.3326 | H25A...C20 <sup>xii</sup>   | 3.4456 |
| C6...H15                | 3.2978 | H25A...H15 <sup>xii</sup>   | 3.0567 |
| C6...H26                | 3.2986 | H25A...H20 <sup>xii</sup>   | 3.1108 |
| C7...H13                | 3.2482 | H25A...H31A <sup>v</sup>    | 3.5533 |
| C7...H16                | 3.2131 | H25A...H33B                 | 3.1346 |
| C7...H20                | 3.2413 | H25A...H33C                 | 3.1926 |
| C8...H21                | 3.2791 | H25B...C31 <sup>v</sup>     | 2.9737 |
| C8...H22                | 3.2386 | H25B...C33                  | 3.3771 |
| C8...H38                | 3.1989 | H25B...H31A <sup>v</sup>    | 2.9950 |
| C9...H13 <sup>ii</sup>  | 3.3072 | H25B...H31B <sup>v</sup>    | 2.8407 |
| C10...H24               | 2.6704 | H25B...H31C <sup>v</sup>    | 2.5905 |
| C10...H32               | 3.0699 | H25B...H33B                 | 2.8224 |
| C10...H33B              | 3.4228 | H25B...H33C                 | 3.2015 |
| C10...H38               | 2.6273 | H25C...O1 <sup>viii</sup>   | 3.1709 |
| C10...H38 <sup>i</sup>  | 2.5861 | H25C...C20 <sup>xii</sup>   | 3.3808 |
| C11...H24               | 3.0840 | H25C...C31 <sup>v</sup>     | 3.2228 |
| C11...H29A              | 2.8081 | H25C...H18 <sup>viii</sup>  | 3.0878 |
| C11...H29B              | 3.0590 | H25C...H20 <sup>xii</sup>   | 2.8927 |
| C11...H33B              | 2.8695 | H25C...H31A <sup>v</sup>    | 3.2606 |
| C11...H33C              | 3.2447 | H25C...H31B <sup>v</sup>    | 2.6372 |
| C11...H38               | 3.2261 | H25C...H31C <sup>v</sup>    | 3.2727 |
| C12...H22 <sup>i</sup>  | 3.0694 | H26...O1 <sup>ix</sup>      | 3.5013 |
| C12...H38               | 3.2849 | H26...C18 <sup>ix</sup>     | 3.5090 |
| C12...H38 <sup>i</sup>  | 3.2145 | H26...C18 <sup>x</sup>      | 3.2026 |
| C13...H16               | 2.7550 | H26...C21 <sup>x</sup>      | 3.1118 |
| C13...H20               | 3.2658 | H26...H18 <sup>ix</sup>     | 3.0278 |
| C14...H23A              | 3.3417 | H26...H18 <sup>x</sup>      | 3.3675 |
| C14...H23B              | 2.6235 | H26...H21 <sup>x</sup>      | 3.2410 |
| C15...H26               | 3.2794 | H26...H26 <sup>xv</sup>     | 3.1030 |
| C16...H13               | 2.6614 | H26...H31A <sup>iv</sup>    | 3.3469 |
| C16...H16 <sup>ii</sup> | 2.9972 | H26...H31B <sup>iv</sup>    | 3.1721 |
| C17...H18               | 3.2637 | H26...H32 <sup>iv</sup>     | 3.1980 |
| C17...H28               | 3.2805 | H27...C22                   | 3.2661 |
| C18...H28               | 3.2537 | H27...C28                   | 3.4768 |
| C19...H14               | 2.9580 | H27...H22                   | 2.8900 |
| C19...H16               | 2.6272 | H27...H28                   | 3.2842 |

|                         |        |                             |        |
|-------------------------|--------|-----------------------------|--------|
| C19...H16 <sup>ii</sup> | 2.5480 | H28...C15 <sup>xiv</sup>    | 3.4544 |
| C19...H25B              | 3.2248 | H28...C15 <sup>xi</sup>     | 3.5967 |
| C19...H27               | 2.6840 | H28...C20 <sup>xi</sup>     | 3.3255 |
| C20...H13               | 3.2641 | H28...H15 <sup>xiv</sup>    | 2.9357 |
| C21...H22               | 3.2532 | H28...H20 <sup>xi</sup>     | 3.3926 |
| C22...H21               | 3.2625 | H28...H27                   | 3.2842 |
| C22...H38               | 2.7539 | H28...H28 <sup>ii</sup>     | 3.5764 |
| C23...H14               | 3.4161 | H28...H30C                  | 2.8932 |
| C23...H25B              | 3.3955 | H29A...O2 <sup>vii</sup>    | 3.3299 |
| C23...H25C              | 2.7807 | H29A...O9 <sup>vii</sup>    | 2.5181 |
| C23...H30B              | 2.7567 | H29A...C3 <sup>vii</sup>    | 3.2506 |
| C23...H30C              | 3.3936 | H29A...C21 <sup>vi</sup>    | 3.2650 |
| C24...H31A              | 2.6089 | H29A...C23 <sup>vii</sup>   | 3.5074 |
| C24...H31B              | 3.3143 | H29A...H21 <sup>vi</sup>    | 2.7972 |
| C24...H31C              | 2.7163 | H29A...H23A <sup>vii</sup>  | 3.4384 |
| C24...H33A              | 3.2892 | H29A...H30A <sup>vi</sup>   | 3.5700 |
| C24...H33B              | 2.6485 | H29A...H30B <sup>vi</sup>   | 3.4851 |
| C24...H33C              | 2.6485 | H29A...H30C <sup>vi</sup>   | 3.1933 |
| C25...H23B              | 2.9786 | H29B...O4 <sup>xii</sup>    | 2.6528 |
| C25...H27               | 3.3723 | H29B...O35 <sup>xii</sup>   | 3.0235 |
| C25...H30A              | 2.6760 | H29B...C4 <sup>xii</sup>    | 3.2328 |
| C25...H30B              | 2.7436 | H29B...C7 <sup>xii</sup>    | 3.5885 |
| C25...H30C              | 3.3570 | H29B...H15 <sup>xii</sup>   | 3.1669 |
| C26...H15               | 3.2829 | H29B...H21 <sup>vi</sup>    | 3.0405 |
| C27...H25A              | 3.3579 | H30A...O3                   | 2.7212 |
| C27...H25B              | 2.7177 | H30A...O5 <sup>viii</sup>   | 3.2590 |
| C27...H25C              | 2.7179 | H30A...O9 <sup>vi</sup>     | 3.4783 |
| C27...H30A              | 3.3348 | H30A...C23 <sup>vi</sup>    | 2.8395 |
| C27...H30B              | 2.6776 | H30A...H23A <sup>vi</sup>   | 2.2943 |
| C27...H30C              | 2.6775 | H30A...H23B <sup>vi</sup>   | 2.6337 |
| C28...H18               | 3.2526 | H30A...H29A <sup>viii</sup> | 3.5700 |
| C29...H31A              | 3.3231 | H30B...O1 <sup>viii</sup>   | 3.3367 |
| C29...H31C              | 2.7928 | H30B...O3 <sup>viii</sup>   | 2.6963 |
| C29...H32               | 3.3668 | H30B...O5 <sup>viii</sup>   | 2.9457 |
| C29...H33B              | 3.2743 | H30B...O6 <sup>viii</sup>   | 2.8462 |
| C29...H33C              | 2.6417 | H30B...C11 <sup>viii</sup>  | 2.8229 |
| C30...H23B              | 2.7246 | H30B...C12 <sup>viii</sup>  | 3.2616 |
| C30...H25A              | 2.6845 | H30B...H23A <sup>vi</sup>   | 3.2475 |
| C30...H25B              | 3.3585 | H30B...H29A <sup>viii</sup> | 3.4851 |
| C30...H25C              | 2.7325 | H30C...O6 <sup>viii</sup>   | 3.0368 |
| C30...H27               | 2.6755 | H30C...C17                  | 3.3953 |
| C31...H24               | 2.6206 | H30C...C18                  | 3.4007 |
| C31...H29B              | 2.7028 | H30C...C21                  | 2.9080 |
| C31...H33A              | 2.5717 | H30C...C22                  | 2.8829 |
| C31...H33B              | 3.2728 | H30C...C28                  | 2.6253 |
| C31...H33C              | 2.6445 | H30C...H21                  | 3.3079 |
| C32...H29A              | 3.3000 | H30C...H22                  | 3.2707 |
| C32...H29B              | 2.5529 | H30C...H23A <sup>vi</sup>   | 3.5540 |
| C33...H24               | 3.2886 | H30C...H28                  | 2.8932 |
| C33...H29B              | 2.8319 | H30C...H29A <sup>viii</sup> | 3.1933 |
| C33...H31A              | 3.2533 | H31A...O2 <sup>vii</sup>    | 3.2457 |
| C33...H31B              | 2.6329 | H31A...C6 <sup>vii</sup>    | 3.3956 |



|                         |        |                            |        |
|-------------------------|--------|----------------------------|--------|
| C33...H31C              | 2.6329 | H31A...C7 <sup>vii</sup>   | 3.4473 |
| C38...H22               | 2.6775 | H31A...C13 <sup>vii</sup>  | 3.1200 |
| C38...H38 <sup>i</sup>  | 2.9801 | H31A...C15 <sup>vii</sup>  | 3.3114 |
| H13...H16               | 2.6709 | H31A...C20 <sup>vii</sup>  | 3.0716 |
| H13...H26               | 2.3280 | H31A...C25 <sup>xii</sup>  | 3.4510 |
| H14...H23B              | 3.5784 | H31A...C26 <sup>vii</sup>  | 2.9618 |
| H14...H25A              | 2.3600 | H31A...H13 <sup>vii</sup>  | 3.5785 |
| H14...H25B              | 2.3446 | H31A...H20 <sup>vii</sup>  | 3.5206 |
| H14...H25C              | 2.8584 | H31A...H25A <sup>xii</sup> | 3.5533 |
| H14...H27               | 2.3302 | H31A...H25B <sup>xii</sup> | 2.9950 |
| H14...H30A              | 2.3718 | H31A...H25C <sup>xii</sup> | 3.2606 |
| H14...H30B              | 2.8616 | H31A...H26 <sup>vii</sup>  | 3.3469 |
| H14...H30C              | 2.3413 | H31A...H33C <sup>xii</sup> | 3.3887 |
| H15...H20               | 2.3357 | H31B...O2 <sup>xii</sup>   | 3.4435 |
| H16...H16 <sup>ii</sup> | 3.5748 | H31B...O9 <sup>xii</sup>   | 3.2629 |
| H18...H21               | 2.3709 | H31B...C3 <sup>xii</sup>   | 3.4083 |
| H20...H26               | 2.3634 | H31B...C18 <sup>xiii</sup> | 3.5231 |
| H21...H28               | 2.3363 | H31B...C20 <sup>vii</sup>  | 3.4321 |
| H22...H28               | 2.3107 | H31B...C25 <sup>xii</sup>  | 3.1624 |
| H22...H38               | 2.6681 | H31B...C26 <sup>vii</sup>  | 3.2292 |
| H23A...H27              | 2.2195 | H31B...H18 <sup>xiii</sup> | 2.5750 |
| H23A...H30B             | 3.2808 | H31B...H20 <sup>vii</sup>  | 3.5216 |
| H23B...H25B             | 3.5017 | H31B...H25B <sup>xii</sup> | 2.8407 |
| H23B...H25C             | 2.4530 | H31B...H25C <sup>xii</sup> | 2.6372 |
| H23B...H27              | 2.6556 | H31B...H26 <sup>vii</sup>  | 3.1721 |
| H23B...H30A             | 3.5342 | H31C...O2 <sup>xii</sup>   | 2.9366 |
| H23B...H30B             | 2.1205 | H31C...O4 <sup>xii</sup>   | 3.4729 |
| H23B...H30C             | 3.1637 | H31C...O35 <sup>xii</sup>  | 2.7377 |
| H24...H29A              | 2.2256 | H31C...C3 <sup>xii</sup>   | 3.2236 |
| H24...H29B              | 2.6419 | H31C...C4 <sup>xii</sup>   | 3.2431 |
| H24...H31A              | 2.3703 | H31C...C25 <sup>xii</sup>  | 3.3425 |
| H24...H31B              | 3.4952 | H31C...H25B <sup>xii</sup> | 2.5905 |
| H24...H31C              | 2.9698 | H31C...H25C <sup>xii</sup> | 3.2727 |
| H24...H32               | 2.3431 | H32...C13 <sup>vii</sup>   | 3.1698 |
| H24...H33B              | 3.5446 | H32...C26 <sup>vii</sup>   | 3.2983 |
| H24...H33C              | 3.5432 | H32...H13 <sup>vii</sup>   | 2.9601 |
| H25A...H30A             | 2.4727 | H32...H26 <sup>vii</sup>   | 3.1980 |
| H25A...H30B             | 3.0117 | H33A...O2 <sup>xii</sup>   | 3.4129 |
| H25A...H30C             | 3.5627 | H33A...O35                 | 2.5782 |
| H25B...H30A             | 3.5629 | H33A...H18 <sup>xiii</sup> | 3.3732 |
| H25C...H30A             | 2.9822 | H33A...H21 <sup>xiii</sup> | 3.4315 |
| H25C...H30B             | 2.5970 | H33B...O35                 | 2.6895 |
| H27...H30A              | 3.5675 | H33B...C25                 | 3.3784 |
| H27...H30B              | 2.9667 | H33B...H14                 | 3.4854 |
| H27...H30C              | 2.4848 | H33B...H25A                | 3.1346 |
| H29A...H31C             | 3.3150 | H33B...H25B                | 2.8224 |
| H29B...H31A             | 3.1045 | H33C...O2 <sup>xii</sup>   | 3.0556 |
| H29B...H31B             | 3.5406 | H33C...O4 <sup>xii</sup>   | 3.5801 |
| H29B...H31C             | 2.1488 | H33C...O35                 | 3.5160 |
| H29B...H32              | 3.5160 | H33C...H15 <sup>xii</sup>  | 3.5410 |
| H29B...H33A             | 3.5924 | H33C...H25A                | 3.1926 |
| H29B...H33B             | 3.3594 | H33C...H25B                | 3.2015 |

|                           |           |                           |            |
|---------------------------|-----------|---------------------------|------------|
| H29B···H33C               | 2.2753    | H33C···H31A <sup>v</sup>  | 3.3887     |
| H31A···H32                | 2.3555    | H38···O8                  | 2.8828     |
| H31A···H33A               | 3.4652    | H38···H14                 | 2.6189     |
|                           |           |                           |            |
| C8—O1—C12                 | 121.9 (6) | C24—C32—C31               | 109.7 (10) |
| C4—O4—C7                  | 120.9 (6) | C24—C32—C33               | 114.1 (10) |
| C11—O6—C29                | 108.2 (6) | C31—C32—C33               | 111.3 (11) |
| C3—O9—C23                 | 110.0 (6) | C5—C38—C5 <sup>l</sup>    | 89.0 (6)   |
| C3—N36—C19                | 125.9 (7) | C5—C38—C17                | 113.9 (6)  |
| C3—N36—C27                | 112.0 (6) | C5 <sup>l</sup> —C38—C17  | 116.1 (6)  |
| C19—N36—C27               | 122.1 (7) | C6—C13—H13                | 118.948    |
| C10—N37—C11               | 125.5 (7) | C26—C13—H13               | 118.948    |
| C10—N37—C24               | 123.5 (7) | C25—C14—H14               | 107.884    |
| C11—N37—C24               | 110.7 (7) | C27—C14—H14               | 107.884    |
| O2—C3—O9                  | 123.3 (7) | C30—C14—H14               | 107.880    |
| O2—C3—N36                 | 128.5 (7) | C7—C15—H15                | 120.454    |
| O9—C3—N36                 | 108.2 (7) | C20—C15—H15               | 120.461    |
| O4—C4—O35                 | 116.6 (7) | C6—C16—H16                | 112.437    |
| O4—C4—C9                  | 119.4 (7) | C9—C16—H16                | 112.449    |
| O35—C4—C9                 | 123.7 (7) | C9 <sup>ii</sup> —C16—H16 | 112.438    |
| C10—C5—C12                | 109.8 (6) | C8—C18—H18                | 119.907    |
| C10—C5—C38                | 115.4 (6) | C21—C18—H18               | 119.903    |
| C10—C5—C38 <sup>l</sup>   | 111.2 (6) | C15—C20—H20               | 119.791    |
| C12—C5—C38                | 117.6 (6) | C26—C20—H20               | 119.797    |
| C12—C5—C38 <sup>l</sup>   | 111.5 (6) | C18—C21—H21               | 120.957    |
| C38—C5—C38 <sup>l</sup>   | 89.7 (6)  | C28—C21—H21               | 120.966    |
| C7—C6—C13                 | 116.4 (8) | C17—C22—H22               | 119.407    |
| C7—C6—C16                 | 122.6 (8) | C28—C22—H22               | 119.400    |
| C13—C6—C16                | 120.8 (7) | O9—C23—H23A               | 110.717    |
| O4—C7—C6                  | 122.7 (7) | O9—C23—H23B               | 110.710    |
| O4—C7—C15                 | 114.2 (7) | C27—C23—H23A              | 110.718    |
| C6—C7—C15                 | 123.0 (8) | C27—C23—H23B              | 110.714    |
| O1—C8—C17                 | 123.3 (7) | H23A—C23—H23B             | 108.815    |
| O1—C8—C18                 | 114.5 (7) | N37—C24—H24               | 109.405    |
| C17—C8—C18                | 122.1 (8) | C29—C24—H24               | 109.412    |
| C4—C9—C16                 | 118.4 (6) | C32—C24—H24               | 109.410    |
| C4—C9—C16 <sup>ii</sup>   | 114.7 (6) | C14—C25—H25A              | 109.475    |
| C4—C9—C19                 | 109.4 (6) | C14—C25—H25B              | 109.461    |
| C16—C9—C16 <sup>ii</sup>  | 90.1 (6)  | C14—C25—H25C              | 109.475    |
| C16—C9—C19                | 113.0 (7) | H25A—C25—H25B             | 109.476    |
| C16 <sup>ii</sup> —C9—C19 | 110.0 (6) | H25A—C25—H25C             | 109.464    |
| O7—C10—N37                | 118.0 (8) | H25B—C25—H25C             | 109.476    |
| O7—C10—C5                 | 122.6 (7) | C13—C26—H26               | 120.500    |
| N37—C10—C5                | 119.4 (7) | C20—C26—H26               | 120.499    |
| O3—C11—O6                 | 122.2 (7) | N36—C27—H27               | 108.936    |
| O3—C11—N37                | 127.9 (7) | C14—C27—H27               | 108.943    |
| O6—C11—N37                | 109.9 (7) | C23—C27—H27               | 108.938    |
| O1—C12—O5                 | 118.1 (7) | C21—C28—H28               | 119.415    |
| O1—C12—C5                 | 119.8 (7) | C22—C28—H28               | 119.417    |
| O5—C12—C5                 | 122.0 (8) | O6—C29—H29A               | 110.680    |
| C6—C13—C26                | 122.1 (8) | O6—C29—H29B               | 110.683    |
| C25—C14—C27               | 112.1 (7) | C24—C29—H29A              | 110.682    |

|                         |            |                                           |            |
|-------------------------|------------|-------------------------------------------|------------|
| C25—C14—C30             | 111.1 (7)  | C24—C29—H29B                              | 110.687    |
| C27—C14—C30             | 109.7 (7)  | H29A—C29—H29B                             | 108.795    |
| C7—C15—C20              | 119.1 (8)  | C14—C30—H30A                              | 109.474    |
| C6—C16—C9               | 112.5 (7)  | C14—C30—H30B                              | 109.476    |
| C6—C16—C9 <sup>II</sup> | 116.8 (7)  | C14—C30—H30C                              | 109.475    |
| C9—C16—C9 <sup>II</sup> | 88.0 (6)   | H30A—C30—H30B                             | 109.456    |
| C8—C17—C22              | 117.2 (7)  | H30A—C30—H30C                             | 109.476    |
| C8—C17—C38              | 121.8 (7)  | H30B—C30—H30C                             | 109.471    |
| C22—C17—C38             | 121.0 (7)  | C32—C31—H31A                              | 109.474    |
| C8—C18—C21              | 120.2 (8)  | C32—C31—H31B                              | 109.465    |
| O8—C19—N36              | 119.7 (7)  | C32—C31—H31C                              | 109.465    |
| O8—C19—C9               | 120.8 (7)  | H31A—C31—H31B                             | 109.477    |
| N36—C19—C9              | 119.5 (7)  | H31A—C31—H31C                             | 109.477    |
| C15—C20—C26             | 120.4 (9)  | H31B—C31—H31C                             | 109.469    |
| C18—C21—C28             | 118.1 (8)  | C24—C32—H32                               | 107.129    |
| C17—C22—C28             | 121.2 (8)  | C31—C32—H32                               | 107.125    |
| O9—C23—C27              | 105.1 (6)  | C33—C32—H32                               | 107.134    |
| N37—C24—C29             | 100.3 (7)  | C32—C33—H33A                              | 109.465    |
| N37—C24—C32             | 114.1 (8)  | C32—C33—H33B                              | 109.469    |
| C29—C24—C32             | 113.8 (8)  | C32—C33—H33C                              | 109.478    |
| C13—C26—C20             | 119.0 (8)  | H33A—C33—H33B                             | 109.462    |
| N36—C27—C14             | 113.2 (7)  | H33A—C33—H33C                             | 109.482    |
| N36—C27—C23             | 99.5 (6)   | H33B—C33—H33C                             | 109.472    |
| C14—C27—C23             | 116.8 (7)  | C5—C38—H38                                | 111.985    |
| C21—C28—C22             | 121.2 (9)  | C5 <sup>I</sup> —C38—H38                  | 111.981    |
| O6—C29—C24              | 105.3 (7)  | C17—C38—H38                               | 111.989    |
|                         |            |                                           |            |
| C8—O1—C12—O5            | 169.4 (6)  | C38—C5—C38 <sup>I</sup> —C5 <sup>I</sup>  | 12.0 (5)   |
| C8—O1—C12—C5            | -15.1 (10) | C38—C5—C38 <sup>I</sup> —C17 <sup>I</sup> | -104.3 (6) |
| C12—O1—C8—C17           | 7.5 (11)   | C38 <sup>I</sup> —C5—C38—C5 <sup>I</sup>  | -11.6 (5)  |
| C12—O1—C8—C18           | -171.1 (6) | C38 <sup>I</sup> —C5—C38—C17              | 106.7 (6)  |
| C4—O4—C7—C6             | -7.4 (11)  | C7—C6—C13—C26                             | 0.8 (12)   |
| C4—O4—C7—C15            | 169.4 (6)  | C13—C6—C7—O4                              | 176.0 (7)  |
| C7—O4—C4—O35            | -167.8 (6) | C13—C6—C7—C15                             | -0.5 (12)  |
| C7—O4—C4—C9             | 18.7 (10)  | C7—C6—C16—C9                              | -4.0 (11)  |
| C11—O6—C29—C24          | 20.8 (8)   | C7—C6—C16—C9 <sup>II</sup>                | -103.6 (9) |
| C29—O6—C11—O3           | 170.6 (7)  | C16—C6—C7—O4                              | 0.0 (12)   |
| C29—O6—C11—N37          | -8.9 (8)   | C16—C6—C7—C15                             | -176.5 (7) |
| C3—O9—C23—C27           | 19.3 (8)   | C13—C6—C16—C9                             | -179.8 (7) |
| C23—O9—C3—O2            | 172.0 (7)  | C13—C6—C16—C9 <sup>II</sup>               | 80.5 (9)   |
| C23—O9—C3—N36           | -7.5 (8)   | C16—C6—C13—C26                            | 176.9 (7)  |
| C3—N36—C19—O8           | -177.8 (7) | O4—C7—C15—C20                             | -177.4 (6) |
| C3—N36—C19—C9           | 1.7 (12)   | C6—C7—C15—C20                             | -0.5 (13)  |
| C19—N36—C3—O2           | -6.0 (14)  | O1—C8—C17—C22                             | -178.8 (6) |
| C19—N36—C3—O9           | 173.4 (7)  | O1—C8—C17—C38                             | 0.1 (12)   |
| C3—N36—C27—C14          | -105.9 (7) | O1—C8—C18—C21                             | 178.2 (6)  |
| C3—N36—C27—C23          | 18.8 (8)   | C17—C8—C18—C21                            | -0.4 (12)  |
| C27—N36—C3—O2           | 172.4 (8)  | C18—C8—C17—C22                            | -0.2 (11)  |
| C27—N36—C3—O9           | -8.2 (9)   | C18—C8—C17—C38                            | 178.6 (7)  |
| C19—N36—C27—C14         | 72.6 (9)   | C4—C9—C16—C6                              | 14.6 (9)   |
| C19—N36—C27—C23         | -162.7 (7) | C4—C9—C16—C9 <sup>II</sup>                | 132.8 (6)  |
| C27—N36—C19—O8          | 3.9 (12)   | C4—C9—C16 <sup>II</sup> —C6 <sup>II</sup> | -21.5 (9)  |

|                                           |            |                                            |            |
|-------------------------------------------|------------|--------------------------------------------|------------|
| C27—N36—C19—C9                            | -176.6 (6) | C4—C9—C16 <sup>II</sup> —C9 <sup>II</sup>  | -135.9 (6) |
| C10—N37—C11—O3                            | -12.9 (14) | C4—C9—C19—O8                               | -117.9 (8) |
| C10—N37—C11—O6                            | 166.7 (7)  | C4—C9—C19—N36                              | 62.6 (9)   |
| C11—N37—C10—O7                            | 178.9 (7)  | C16—C9—C16 <sup>II</sup> —C6 <sup>II</sup> | 100.1 (6)  |
| C11—N37—C10—C5                            | -2.5 (12)  | C16—C9—C16 <sup>II</sup> —C9 <sup>II</sup> | -14.3 (5)  |
| C10—N37—C24—C29                           | -155.1 (7) | C16 <sup>II</sup> —C9—C16—C6               | -103.9 (6) |
| C10—N37—C24—C32                           | 82.9 (10)  | C16 <sup>II</sup> —C9—C16—C9 <sup>II</sup> | 14.4 (5)   |
| C24—N37—C10—O7                            | -7.9 (12)  | C16—C9—C19—O8                              | 108.0 (8)  |
| C24—N37—C10—C5                            | 170.7 (7)  | C16—C9—C19—N36                             | -71.5 (9)  |
| C11—N37—C24—C29                           | 19.0 (9)   | C19—C9—C16—C6                              | 144.2 (6)  |
| C11—N37—C24—C32                           | -103.1 (8) | C19—C9—C16—C9 <sup>II</sup>                | -97.5 (6)  |
| C24—N37—C11—O3                            | 173.2 (8)  | C16 <sup>II</sup> —C9—C19—O8               | 8.9 (10)   |
| C24—N37—C11—O6                            | -7.2 (9)   | C16 <sup>II</sup> —C9—C19—N36              | -170.6 (6) |
| O4—C4—C9—C16                              | -22.5 (10) | C19—C9—C16 <sup>II</sup> —C6 <sup>II</sup> | -145.4 (6) |
| O4—C4—C9—C16 <sup>II</sup>                | 82.1 (8)   | C19—C9—C16 <sup>II</sup> —C9 <sup>II</sup> | 100.3 (6)  |
| O4—C4—C9—C19                              | -153.7 (6) | C6—C13—C26—C20                             | 0.0 (12)   |
| O35—C4—C9—C16                             | 164.5 (7)  | C25—C14—C27—N36                            | 54.4 (9)   |
| O35—C4—C9—C16 <sup>II</sup>               | -91.0 (9)  | C25—C14—C27—C23                            | -60.3 (9)  |
| O35—C4—C9—C19                             | 33.2 (10)  | C30—C14—C27—N36                            | 178.4 (6)  |
| C10—C5—C12—O1                             | 149.8 (7)  | C30—C14—C27—C23                            | 63.7 (8)   |
| C10—C5—C12—O5                             | -34.9 (10) | C7—C15—C20—C26                             | 1.3 (14)   |
| C12—C5—C10—O7                             | 123.1 (8)  | C8—C17—C22—C28                             | 0.1 (11)   |
| C12—C5—C10—N37                            | -55.4 (9)  | C8—C17—C38—C5                              | 0.4 (10)   |
| C10—C5—C38—C5 <sup>I</sup>                | 101.9 (6)  | C8—C17—C38—C5 <sup>I</sup>                 | 101.8 (8)  |
| C10—C5—C38—C17                            | -139.9 (6) | C22—C17—C38—C5                             | 179.3 (6)  |
| C38—C5—C10—O7                             | -101.1 (9) | C22—C17—C38—C5 <sup>I</sup>                | -79.4 (9)  |
| C38—C5—C10—N37                            | 80.4 (9)   | C38—C17—C22—C28                            | -178.8 (6) |
| C10—C5—C38 <sup>I</sup> —C5 <sup>I</sup>  | -105.3 (6) | C8—C18—C21—C28                             | 1.2 (12)   |
| C10—C5—C38 <sup>I</sup> —C17 <sup>I</sup> | 138.4 (6)  | C15—C20—C26—C13                            | -1.1 (14)  |
| C38 <sup>I</sup> —C5—C10—O7               | -0.7 (10)  | C18—C21—C28—C22                            | -1.3 (13)  |
| C38 <sup>I</sup> —C5—C10—N37              | -179.3 (6) | C17—C22—C28—C21                            | 0.7 (12)   |
| C12—C5—C38—C5 <sup>I</sup>                | -125.8 (6) | O9—C23—C27—N36                             | -21.8 (7)  |
| C12—C5—C38—C17                            | -7.6 (9)   | O9—C23—C27—C14                             | 100.4 (7)  |
| C38—C5—C12—O1                             | 15.1 (10)  | N37—C24—C29—O6                             | -23.2 (8)  |
| C38—C5—C12—O5                             | -169.7 (7) | N37—C24—C32—C31                            | -177.1 (7) |
| C12—C5—C38 <sup>I</sup> —C5 <sup>I</sup>  | 131.8 (6)  | N37—C24—C32—C33                            | 57.2 (10)  |
| C12—C5—C38 <sup>I</sup> —C17 <sup>I</sup> | 15.5 (9)   | C29—C24—C32—C31                            | 68.6 (10)  |
| C38 <sup>I</sup> —C5—C12—O1               | -86.5 (8)  | C29—C24—C32—C33                            | -57.1 (11) |
| C38 <sup>I</sup> —C5—C12—O5               | 88.8 (9)   | C32—C24—C29—O6                             | 99.1 (9)   |

Symmetry codes: (i)  $-x+1, -y+1, z$ ; (ii)  $-x+1, -y+2, z$ ; (iii)  $x, y-1, z+1$ ; (iv)  $x, y+1, z$ ; (v)  $-x+3/2, y+1/2, -z$ ; (vi)  $-x+3/2, y-1/2, -z+1$ ; (vii)  $x, y-1, z$ ; (viii)  $-x+3/2, y+1/2, -z+1$ ; (ix)  $x, y+1, z-1$ ; (x)  $-x+1, -y+2, z-1$ ; (xi)  $-x+1, -y+2, z+1$ ; (xii)  $-x+3/2, y-1/2, -z$ ; (xiii)  $x, y, z-1$ ; (xiv)  $x, y, z+1$ ; (xv)  $-x+1, -y+3, z$ .

Document origin: *publCIF* [Westrip, S. P. (2010). *J. Apply. Cryst.*, **43**, 920-925].

*syn*-HT 2CE

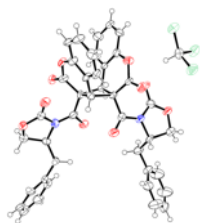

*Crystal data*

|                                                                                |                                           |
|--------------------------------------------------------------------------------|-------------------------------------------|
| C <sub>40</sub> H <sub>29</sub> Cl <sub>3</sub> N <sub>2</sub> O <sub>10</sub> | Z = 4                                     |
| M <sub>r</sub> = 804.00                                                        | F(000) = 1656                             |
| Orthorhombic, P2 <sub>1</sub> 2 <sub>1</sub> 2 <sub>1</sub>                    | D <sub>x</sub> = 1.489 Mg m <sup>-3</sup> |
| a = 10.620 (5) Å                                                               | Mo Kα radiation, λ = 0.71073 Å            |
| b = 15.369 (6) Å                                                               | m = 0.32 mm <sup>-1</sup>                 |
| c = 21.972 (9) Å                                                               | T = 296 K                                 |
| V = 3586 (3) Å <sup>3</sup>                                                    |                                           |

*Data collection*

|                                 |                                                   |
|---------------------------------|---------------------------------------------------|
| 17425 measured reflections      | q <sub>max</sub> = 25.1°, q <sub>min</sub> = 1.6° |
| 6314 independent reflections    | h = -12@12                                        |
| 3951 reflections with I > 2s(I) | k = -16@18                                        |
| R <sub>int</sub> = 0.106        | l = -26@24                                        |

*Refinement*

|                                                          |                                                                                                                                                                   |
|----------------------------------------------------------|-------------------------------------------------------------------------------------------------------------------------------------------------------------------|
| Refinement on F <sup>2</sup>                             | H-atom parameters constrained                                                                                                                                     |
| Least-squares matrix: full                               | w = 1/[s <sup>2</sup> (F <sub>o</sub> <sup>2</sup> ) + (0.1674P) <sup>2</sup> + 5.378P] where P = (F <sub>o</sub> <sup>2</sup> + 2F <sub>c</sub> <sup>2</sup> )/3 |
| R[F <sup>2</sup> > 2s(F <sup>2</sup> )] = 0.096          | (D/s) <sub>max</sub> < 0.001                                                                                                                                      |
| wR(F <sup>2</sup> ) = 0.301                              | Dρ <sub>max</sub> = 0.62 e Å <sup>-3</sup>                                                                                                                        |
| S = 1.07                                                 | Dρ <sub>min</sub> = -0.55 e Å <sup>-3</sup>                                                                                                                       |
| 6314 reflections                                         | Extinction correction: SHELXL, F <sub>c</sub> = kF <sub>c</sub> [1 + 0.001x F <sub>c</sub> <sup>2</sup> /sin(2q)] <sup>-1/4</sup>                                 |
| 506 parameters                                           | Extinction coefficient: 0.020 (4)                                                                                                                                 |
| 0 restraints                                             | Absolute structure: Flack x determined using 1261 quotients [(I+)-(I-)]/[(I+)+(I-)] (Parsons and Flack (2004), Acta Cryst. A60, s61).                             |
| Hydrogen site location: inferred from neighbouring sites | Absolute structure parameter: -0.02 (8)                                                                                                                           |

*Special details*

*Geometry.* All esds (except the esd in the dihedral angle between two l.s. planes) are estimated using the full covariance matrix. The cell esds are taken into account individually in the estimation of esds in distances, angles and torsion angles; correlations between esds in cell parameters are only used when they are defined by crystal symmetry. An approximate (isotropic) treatment of cell esds is used for estimating esds involving l.s. planes.

*Fractional atomic coordinates and isotropic or equivalent isotropic displacement parameters (Å<sup>2</sup>) for (p212121\_a)*

|      | x           | y          | z          | U <sub>iso</sub> <sup>*</sup> /U <sub>eq</sub> |
|------|-------------|------------|------------|------------------------------------------------|
| Cl01 | 0.6939 (4)  | 0.1918 (2) | 0.8074 (2) | 0.0529 (11)                                    |
| Cl02 | 0.8089 (4)  | 0.3552 (2) | 0.8394 (2) | 0.0546 (11)                                    |
| Cl03 | 0.9564 (4)  | 0.1990 (2) | 0.8417 (2) | 0.0538 (11)                                    |
| O004 | 0.8981 (9)  | 0.5305 (5) | 0.5295 (4) | 0.034 (2)                                      |
| O005 | 1.0319 (10) | 0.4834 (6) | 0.4628 (4) | 0.037 (2)                                      |
| O006 | 0.7458 (10) | 0.4661 (6) | 0.4271 (5) | 0.041 (2)                                      |

|      |             |              |            |           |
|------|-------------|--------------|------------|-----------|
| O007 | 0.9756 (10) | 0.2529 (6)   | 0.4485 (4) | 0.039 (2) |
| O008 | 0.7880 (10) | 0.4438 (6)   | 0.3288 (4) | 0.039 (2) |
| O009 | 0.9667 (10) | 0.0656 (5)   | 0.6654 (5) | 0.039 (2) |
| O00A | 0.9838 (10) | 0.2106 (6)   | 0.6637 (5) | 0.042 (2) |
| O00B | 0.8439 (8)  | 0.3642 (6)   | 0.6806 (4) | 0.036 (2) |
| O00C | 0.7437 (9)  | 0.1835 (6)   | 0.5174 (5) | 0.038 (2) |
| O00D | 0.7024 (9)  | 0.2650 (6)   | 0.6662 (4) | 0.039 (2) |
| N00E | 0.8721 (11) | 0.3527 (7)   | 0.3949 (5) | 0.035 (3) |
| C1   | 0.7465 (14) | 0.2108 (8)   | 0.2162 (6) | 0.033 (3) |
| H1A  | 0.6705      | 0.2379       | 0.2254     | 0.040*    |
| C00G | 0.7958 (15) | 0.4265 (9)   | 0.3873 (6) | 0.035 (3) |
| N00H | 0.8638 (11) | 0.1352 (7)   | 0.5940 (5) | 0.035 (3) |
| C00I | 0.8338 (13) | 0.1984 (8)   | 0.2613 (6) | 0.031 (3) |
| C00J | 0.9474 (14) | 0.4666 (8)   | 0.4966 (7) | 0.034 (3) |
| C00K | 0.8328 (13) | 0.2938 (8)   | 0.5822 (6) | 0.028 (3) |
| C00L | 1.1351 (13) | 0.4244 (8)   | 0.6006 (7) | 0.033 (3) |
| H00A | 1.1804      | 0.4119       | 0.5655     | 0.040*    |
| C00M | 0.9207 (14) | 0.3227 (8)   | 0.4480 (6) | 0.033 (3) |
| C00N | 1.1865 (15) | 0.4805 (10)  | 0.6442 (7) | 0.042 (4) |
| H00B | 1.2631      | 0.5079       | 0.6367     | 0.051*    |
| C00O | 1.1245 (14) | 0.4951 (8)   | 0.6974 (7) | 0.036 (3) |
| H00C | 1.1605      | 0.5304       | 0.7270     | 0.043*    |
| C00P | 1.0161 (12) | 0.3867 (7)   | 0.6092 (6) | 0.025 (3) |
| C00Q | 0.9614 (13) | 0.3277 (7)   | 0.5623 (6) | 0.029 (3) |
| H00D | 1.0191      | 0.2809       | 0.5506     | 0.035*    |
| C00R | 0.7901 (13) | 0.3039 (8)   | 0.6450 (6) | 0.031 (3) |
| C00S | 0.7691 (15) | 0.1840 (8)   | 0.1580 (7) | 0.043 (4) |
| H00E | 0.7109      | 0.1972       | 0.1278     | 0.052*    |
| C00T | 0.8986 (13) | 0.3121 (8)   | 0.3364 (6) | 0.032 (3) |
| H00F | 0.9879      | 0.2962       | 0.3339     | 0.039*    |
| C00U | 0.5710 (14) | 0.5163 (10)  | 0.6293 (6) | 0.039 (3) |
| H00G | 0.4971      | 0.5157       | 0.6520     | 0.047*    |
| C00V | 0.8460 (14) | 0.0438 (8)   | 0.5774 (6) | 0.031 (3) |
| H00H | 0.7569      | 0.0320       | 0.5693     | 0.037*    |
| C00W | 0.6115 (14) | 0.4403 (8)   | 0.5997 (6) | 0.034 (3) |
| H00I | 0.5639      | 0.3897       | 0.6025     | 0.041*    |
| C00X | 0.8093 (13) | 0.2017 (8)   | 0.5606 (6) | 0.030 (3) |
| C00Y | 0.7210 (13) | 0.4405 (8)   | 0.5665 (6) | 0.031 (3) |
| C00Z | 0.9002 (13) | 0.3742 (8)   | 0.5059 (6) | 0.028 (3) |
| C010 | 0.7884 (12) | 0.5189 (8)   | 0.5630 (6) | 0.032 (3) |
| C011 | 0.9414 (14) | 0.1418 (9)   | 0.6431 (6) | 0.036 (3) |
| C012 | 0.8718 (15) | 0.3893 (9)   | 0.2955 (6) | 0.037 (3) |
| H01A | 0.9490      | 0.4202       | 0.2860     | 0.044*    |
| H01B | 0.8331      | 0.3704       | 0.2578     | 0.044*    |
| C013 | 0.7702 (12) | 0.3622 (8)   | 0.5360 (6) | 0.029 (3) |
| H01C | 0.7085      | 0.3352       | 0.5088     | 0.035*    |
| C014 | 0.9085 (13) | -0.0757 (8)  | 0.5066 (7) | 0.034 (3) |
| C015 | 0.8161 (14) | 0.2321 (8)   | 0.3246 (6) | 0.030 (3) |
| H01D | 0.8373      | 0.1868       | 0.3535     | 0.037*    |
| H01E | 0.7283      | 0.2474       | 0.3306     | 0.037*    |
| C016 | 0.6385 (15) | 0.5892 (9)   | 0.6250 (7) | 0.044 (4) |
| H01F | 0.6107      | 0.6384       | 0.6456     | 0.053*    |
| C017 | 0.9581 (13) | 0.4038 (8)   | 0.6645 (6) | 0.031 (3) |
| C018 | 1.0069 (14) | 0.4570 (9)   | 0.7078 (6) | 0.035 (3) |
| H01G | 0.9630      | 0.4679       | 0.7436     | 0.042*    |
| C019 | 0.7817 (18) | -0.1873 (12) | 0.4651 (9) | 0.064 (5) |
| H01H | 0.7056      | -0.2039      | 0.4477     | 0.077*    |

|      |             |              |             |           |
|------|-------------|--------------|-------------|-----------|
| C01A | 0.9466 (15) | 0.1536 (9)   | 0.2455 (7)  | 0.041 (4) |
| H01I | 1.0093      | 0.1451       | 0.2745      | 0.049*    |
| C01B | 0.7455 (14) | 0.5946 (8)   | 0.5921 (6)  | 0.036 (3) |
| H01J | 0.7893      | 0.6468       | 0.5887      | 0.044*    |
| C01C | 0.8860 (16) | 0.0016 (9)   | 0.6366 (7)  | 0.043 (4) |
| H01K | 0.8134      | -0.0111      | 0.6620      | 0.052*    |
| H01L | 0.9315      | -0.0520      | 0.6290      | 0.052*    |
| C01D | 0.876 (2)   | -0.2477 (10) | 0.4713 (7)  | 0.055 (5) |
| H01M | 0.8630      | -0.3052      | 0.4596      | 0.066*    |
| C01E | 0.9251 (14) | 0.0185 (9)   | 0.5239 (7)  | 0.039 (4) |
| H01N | 1.0130      | 0.0290       | 0.5333      | 0.047*    |
| H01O | 0.9028      | 0.0548       | 0.4894      | 0.047*    |
| C01F | 0.7971 (16) | -0.1029 (9)  | 0.4838 (6)  | 0.042 (4) |
| H01P | 0.7302      | -0.0640      | 0.4808      | 0.050*    |
| C01G | 0.8745 (16) | 0.1384 (9)   | 0.1431 (8)  | 0.047 (4) |
| H01Q | 0.8868      | 0.1180       | 0.1037      | 0.056*    |
| C01H | 0.986 (2)   | -0.2223 (11) | 0.4944 (10) | 0.080 (7) |
| H01R | 1.0518      | -0.2619      | 0.4984      | 0.096*    |
| C01I | 0.8366 (18) | 0.2526 (10)  | 0.8055 (8)  | 0.053 (4) |
| H01S | 0.8607      | 0.2616       | 0.7629      | 0.064*    |
| C01J | 0.9619 (17) | 0.1235 (10)  | 0.1877 (8)  | 0.049 (4) |
| H01T | 1.0339      | 0.0918       | 0.1783      | 0.059*    |
| C01K | 1.002 (2)   | -0.1372 (12) | 0.5124 (9)  | 0.069 (6) |
| H01U | 1.0794      | -0.1206      | 0.5290      | 0.083*    |

*Atomic displacement parameters ( $\text{\AA}^2$ ) for (p212121 a)*

|      | $U^{11}$   | $U^{22}$    | $U^{33}$   | $U^{12}$     | $U^{13}$   | $U^{23}$    |
|------|------------|-------------|------------|--------------|------------|-------------|
| Cl01 | 0.063 (3)  | 0.0325 (19) | 0.063 (3)  | 0.0024 (19)  | -0.014 (2) | 0.0050 (18) |
| Cl02 | 0.071 (3)  | 0.0324 (18) | 0.061 (3)  | -0.007 (2)   | -0.001 (2) | 0.0001 (18) |
| Cl03 | 0.056 (2)  | 0.038 (2)   | 0.068 (3)  | -0.0039 (18) | -0.001 (2) | 0.0075 (19) |
| O004 | 0.043 (6)  | 0.015 (4)   | 0.044 (6)  | 0.001 (4)    | 0.001 (5)  | 0.004 (4)   |
| O005 | 0.048 (6)  | 0.030 (5)   | 0.034 (5)  | -0.006 (5)   | 0.004 (5)  | 0.007 (4)   |
| O006 | 0.048 (6)  | 0.026 (5)   | 0.049 (6)  | 0.009 (5)    | 0.000 (5)  | -0.003 (4)  |
| O007 | 0.055 (6)  | 0.022 (5)   | 0.041 (6)  | 0.006 (5)    | -0.001 (5) | -0.005 (4)  |
| O008 | 0.058 (7)  | 0.027 (5)   | 0.031 (6)  | 0.001 (5)    | 0.004 (5)  | 0.000 (4)   |
| O009 | 0.046 (6)  | 0.024 (5)   | 0.046 (6)  | -0.004 (4)   | -0.013 (5) | 0.004 (4)   |
| O00A | 0.055 (7)  | 0.017 (4)   | 0.053 (6)  | -0.003 (4)   | -0.015 (5) | 0.003 (4)   |
| O00B | 0.030 (5)  | 0.039 (5)   | 0.040 (6)  | -0.007 (4)   | -0.001 (4) | -0.007 (4)  |
| O00C | 0.039 (6)  | 0.028 (5)   | 0.047 (6)  | 0.001 (4)    | -0.011 (5) | -0.003 (4)  |
| O00D | 0.039 (6)  | 0.035 (5)   | 0.042 (6)  | -0.010 (5)   | 0.000 (5)  | 0.006 (4)   |
| N00E | 0.046 (7)  | 0.030 (6)   | 0.029 (6)  | 0.003 (5)    | 0.002 (5)  | 0.003 (5)   |
| C1   | 0.043 (8)  | 0.018 (6)   | 0.038 (8)  | 0.005 (6)    | -0.010 (7) | -0.008 (6)  |
| C00G | 0.046 (9)  | 0.027 (7)   | 0.033 (8)  | -0.008 (7)   | 0.001 (7)  | 0.005 (6)   |
| N00H | 0.047 (7)  | 0.020 (6)   | 0.036 (7)  | -0.005 (5)   | 0.003 (6)  | -0.001 (5)  |
| C00I | 0.045 (8)  | 0.021 (6)   | 0.029 (7)  | -0.010 (6)   | -0.001 (6) | 0.007 (5)   |
| C00J | 0.035 (8)  | 0.023 (7)   | 0.043 (9)  | -0.003 (6)   | -0.001 (7) | -0.005 (6)  |
| C00K | 0.041 (8)  | 0.013 (6)   | 0.029 (7)  | 0.003 (5)    | -0.003 (6) | -0.002 (5)  |
| C00L | 0.032 (8)  | 0.021 (6)   | 0.046 (9)  | 0.000 (6)    | 0.006 (7)  | -0.005 (6)  |
| C00M | 0.042 (8)  | 0.020 (7)   | 0.039 (8)  | -0.005 (6)   | 0.003 (6)  | -0.001 (6)  |
| C00N | 0.036 (8)  | 0.047 (9)   | 0.044 (9)  | -0.014 (7)   | 0.000 (7)  | -0.003 (7)  |
| C00O | 0.048 (9)  | 0.017 (6)   | 0.043 (9)  | -0.005 (6)   | -0.002 (7) | -0.001 (6)  |
| C00P | 0.030 (7)  | 0.016 (6)   | 0.030 (7)  | -0.004 (5)   | -0.004 (6) | 0.004 (5)   |
| C00Q | 0.038 (8)  | 0.016 (6)   | 0.033 (7)  | -0.003 (5)   | -0.002 (6) | -0.006 (5)  |
| C00R | 0.043 (8)  | 0.015 (6)   | 0.036 (8)  | -0.010 (6)   | -0.005 (6) | 0.002 (5)   |
| C00S | 0.057 (10) | 0.017 (6)   | 0.057 (10) | -0.010 (7)   | -0.010 (8) | -0.002 (7)  |
| C00T | 0.043 (8)  | 0.028 (7)   | 0.025 (7)  | 0.005 (6)    | 0.005 (6)  | -0.006 (6)  |



|      |            |            |            |            |             |             |
|------|------------|------------|------------|------------|-------------|-------------|
| C00U | 0.029 (8)  | 0.051 (9)  | 0.037 (8)  | -0.001 (7) | 0.005 (6)   | -0.006 (7)  |
| C00V | 0.039 (8)  | 0.013 (6)  | 0.040 (8)  | -0.003 (5) | 0.004 (6)   | 0.002 (5)   |
| C00W | 0.040 (9)  | 0.020 (7)  | 0.041 (8)  | -0.002 (6) | 0.000 (7)   | 0.007 (6)   |
| C00X | 0.034 (7)  | 0.025 (6)  | 0.032 (7)  | 0.000 (6)  | 0.000 (6)   | 0.004 (6)   |
| C00Y | 0.037 (8)  | 0.013 (6)  | 0.042 (8)  | 0.006 (5)  | 0.005 (6)   | 0.000 (5)   |
| C00Z | 0.037 (8)  | 0.022 (6)  | 0.025 (7)  | -0.004 (6) | -0.004 (6)  | 0.009 (5)   |
| C010 | 0.026 (7)  | 0.025 (7)  | 0.044 (8)  | 0.003 (6)  | 0.002 (6)   | -0.002 (6)  |
| C011 | 0.043 (9)  | 0.031 (8)  | 0.033 (8)  | 0.005 (7)  | -0.008 (6)  | -0.001 (6)  |
| C012 | 0.047 (9)  | 0.033 (8)  | 0.032 (8)  | -0.001 (6) | -0.001 (7)  | -0.001 (6)  |
| C013 | 0.030 (7)  | 0.032 (7)  | 0.027 (7)  | -0.001 (6) | -0.008 (6)  | 0.003 (5)   |
| C014 | 0.032 (8)  | 0.024 (6)  | 0.048 (9)  | 0.000 (6)  | -0.001 (7)  | 0.000 (6)   |
| C015 | 0.043 (8)  | 0.021 (6)  | 0.027 (7)  | -0.001 (6) | 0.002 (6)   | 0.005 (5)   |
| C016 | 0.049 (10) | 0.023 (7)  | 0.060 (10) | 0.004 (7)  | 0.002 (8)   | -0.009 (7)  |
| C017 | 0.032 (7)  | 0.029 (7)  | 0.030 (7)  | -0.006 (6) | -0.002 (6)  | 0.005 (6)   |
| C018 | 0.047 (9)  | 0.033 (7)  | 0.025 (7)  | 0.005 (6)  | -0.005 (6)  | -0.005 (6)  |
| C019 | 0.056 (11) | 0.056 (11) | 0.081 (13) | -0.017 (9) | 0.021 (10)  | -0.029 (9)  |
| C01A | 0.046 (9)  | 0.024 (7)  | 0.051 (9)  | -0.002 (7) | 0.001 (7)   | 0.008 (6)   |
| C01B | 0.048 (9)  | 0.018 (6)  | 0.043 (8)  | -0.002 (6) | 0.004 (7)   | -0.008 (6)  |
| C01C | 0.061 (11) | 0.026 (7)  | 0.043 (9)  | -0.004 (7) | -0.003 (7)  | 0.000 (6)   |
| C01D | 0.101 (15) | 0.018 (7)  | 0.046 (9)  | 0.004 (9)  | 0.007 (10)  | 0.004 (7)   |
| C01E | 0.043 (9)  | 0.027 (7)  | 0.047 (9)  | -0.003 (6) | 0.008 (7)   | -0.009 (6)  |
| C01F | 0.050 (10) | 0.035 (8)  | 0.041 (9)  | 0.013 (7)  | 0.005 (7)   | -0.009 (6)  |
| C01G | 0.061 (11) | 0.021 (7)  | 0.059 (10) | -0.005 (7) | 0.007 (9)   | 0.000 (7)   |
| C01H | 0.099 (17) | 0.043 (10) | 0.099 (16) | 0.036 (11) | -0.040 (13) | -0.029 (10) |
| C01I | 0.079 (12) | 0.043 (9)  | 0.038 (9)  | -0.005 (9) | -0.005 (8)  | 0.011 (7)   |
| C01J | 0.055 (10) | 0.036 (8)  | 0.055 (10) | -0.003 (8) | 0.011 (9)   | -0.009 (7)  |
| C01K | 0.072 (13) | 0.055 (11) | 0.081 (13) | 0.027 (10) | -0.016 (10) | -0.025 (10) |

*Geometric parameters (Å, °) for (p212121\_a)*

|           |            |           |            |
|-----------|------------|-----------|------------|
| Cl01—C01I | 1.781 (19) | C00T—C012 | 1.516 (19) |
| Cl02—C01I | 1.769 (17) | C00T—C015 | 1.532 (18) |
| Cl03—C01I | 1.711 (18) | C00T—H00F | 0.9800     |
| O004—C00J | 1.327 (16) | C00U—C016 | 1.33 (2)   |
| O004—C010 | 1.390 (16) | C00U—C00W | 1.41 (2)   |
| O005—C00J | 1.192 (16) | C00U—H00G | 0.9300     |
| O006—C00G | 1.190 (17) | C00V—C01E | 1.498 (19) |
| O007—C00M | 1.222 (15) | C00V—C01C | 1.51 (2)   |
| O008—C00G | 1.315 (16) | C00V—H00H | 0.9800     |
| O008—C012 | 1.424 (16) | C00W—C00Y | 1.372 (19) |
| O009—C011 | 1.298 (16) | C00W—H00I | 0.9300     |
| O009—C01C | 1.450 (17) | C00Y—C010 | 1.404 (18) |
| O00A—C011 | 1.235 (16) | C00Y—C013 | 1.473 (18) |
| O00B—C00R | 1.342 (15) | C00Z—C013 | 1.543 (18) |
| O00B—C017 | 1.402 (16) | C010—C01B | 1.404 (18) |
| O00C—C00X | 1.211 (16) | C012—H01A | 0.9700     |
| O00D—C00R | 1.201 (16) | C012—H01B | 0.9700     |
| N00E—C00M | 1.358 (17) | C013—H01C | 0.9800     |
| N00E—C00G | 1.404 (18) | C014—C01F | 1.35 (2)   |
| N00E—C00T | 1.455 (17) | C014—C01K | 1.38 (2)   |
| C1—C00S   | 1.36 (2)   | C014—C01E | 1.508 (19) |
| C1—C00I   | 1.371 (18) | C015—H01D | 0.9700     |
| C1—H1A    | 0.9300     | C015—H01E | 0.9700     |
| N00H—C011 | 1.360 (18) | C016—C01B | 1.35 (2)   |
| N00H—C00X | 1.386 (17) | C016—H01F | 0.9300     |
| N00H—C00V | 1.463 (16) | C017—C018 | 1.358 (18) |
| C00I—C01A | 1.42 (2)   | C018—H01G | 0.9300     |

|                |            |                |            |
|----------------|------------|----------------|------------|
| C00I—C015      | 1.495 (18) | C019—C01D      | 1.37 (3)   |
| C00J—C00Z      | 1.520 (18) | C019—C01F      | 1.37 (2)   |
| C00K—C00R      | 1.461 (18) | C019—H01H      | 0.9300     |
| C00K—C00X      | 1.514 (17) | C01A—C01J      | 1.36 (2)   |
| C00K—C00Q      | 1.525 (19) | C01A—H01I      | 0.9300     |
| C00K—C013      | 1.604 (17) | C01B—H01J      | 0.9300     |
| C00L—C00N      | 1.40 (2)   | C01C—H01K      | 0.9700     |
| C00L—C00P      | 1.402 (18) | C01C—H01L      | 0.9700     |
| C00L—H00A      | 0.9300     | C01D—C01H      | 1.34 (3)   |
| C00M—C00Z      | 1.513 (19) | C01D—H01M      | 0.9300     |
| C00N—C00O      | 1.36 (2)   | C01E—H01N      | 0.9700     |
| C00N—H00B      | 0.9300     | C01E—H01O      | 0.9700     |
| C00O—C018      | 1.40 (2)   | C01F—H01P      | 0.9300     |
| C00O—H00C      | 0.9300     | C01G—C01J      | 1.37 (2)   |
| C00P—C017      | 1.388 (18) | C01G—H01Q      | 0.9300     |
| C00P—C00Q      | 1.490 (17) | C01H—C01K      | 1.38 (3)   |
| C00Q—C00Z      | 1.571 (17) | C01H—H01R      | 0.9300     |
| C00Q—H00D      | 0.9800     | C01I—H01S      | 0.9800     |
| C00S—C01G      | 1.36 (2)   | C01J—H01T      | 0.9300     |
| C00S—H00E      | 0.9300     | C01K—H01U      | 0.9300     |
|                |            |                |            |
| C00J—O004—C010 | 121.7 (10) | C00J—C00Z—C00Q | 113.3 (10) |
| C00G—O008—C012 | 110.1 (11) | C013—C00Z—C00Q | 88.7 (9)   |
| C011—O009—C01C | 109.0 (11) | O004—C010—C01B | 114.0 (11) |
| C00R—O00B—C017 | 121.4 (11) | O004—C010—C00Y | 124.5 (11) |
| C00M—N00E—C00G | 126.5 (11) | C01B—C010—C00Y | 121.5 (12) |
| C00M—N00E—C00T | 122.8 (11) | O00A—C011—O009 | 124.0 (12) |
| C00G—N00E—C00T | 110.7 (11) | O00A—C011—N00H | 125.1 (12) |
| C00S—C1—C00I   | 121.1 (14) | O009—C011—N00H | 110.9 (12) |
| C00S—C1—H1A    | 119.4      | O008—C012—C00T | 105.9 (11) |
| C00I—C1—H1A    | 119.4      | O008—C012—H01A | 110.6      |
| O006—C00G—O008 | 125.8 (13) | C00T—C012—H01A | 110.6      |
| O006—C00G—N00E | 125.8 (13) | O008—C012—H01B | 110.6      |
| O008—C00G—N00E | 108.4 (12) | C00T—C012—H01B | 110.6      |
| C011—N00H—C00X | 128.2 (11) | H01A—C012—H01B | 108.7      |
| C011—N00H—C00V | 110.4 (11) | C00Y—C013—C00Z | 114.5 (11) |
| C00X—N00H—C00V | 121.4 (11) | C00Y—C013—C00K | 113.3 (10) |
| C1—C00I—C01A   | 117.4 (13) | C00Z—C013—C00K | 88.8 (9)   |
| C1—C00I—C015   | 122.6 (13) | C00Y—C013—H01C | 112.7      |
| C01A—C00I—C015 | 120.0 (13) | C00Z—C013—H01C | 112.7      |
| O005—C00J—O004 | 118.4 (12) | C00K—C013—H01C | 112.7      |
| O005—C00J—C00Z | 122.3 (12) | C01F—C014—C01K | 117.1 (14) |
| O004—C00J—C00Z | 119.2 (12) | C01F—C014—C01E | 119.5 (13) |
| C00R—C00K—C00X | 110.1 (10) | C01K—C014—C01E | 123.3 (14) |
| C00R—C00K—C00Q | 120.8 (11) | C00I—C015—C00T | 111.3 (10) |
| C00X—C00K—C00Q | 112.2 (11) | C00I—C015—H01D | 109.4      |
| C00R—C00K—C013 | 113.5 (10) | C00T—C015—H01D | 109.4      |
| C00X—C00K—C013 | 110.2 (10) | C00I—C015—H01E | 109.4      |
| C00Q—C00K—C013 | 88.1 (9)   | C00T—C015—H01E | 109.4      |
| C00N—C00L—C00P | 120.9 (13) | H01D—C015—H01E | 108.0      |
| C00N—C00L—H00A | 119.5      | C00U—C016—C01B | 122.8 (14) |
| C00P—C00L—H00A | 119.5      | C00U—C016—H01F | 118.6      |
| O007—C00M—N00E | 119.1 (12) | C01B—C016—H01F | 118.6      |
| O007—C00M—C00Z | 121.4 (12) | C018—C017—C00P | 123.9 (12) |
| N00E—C00M—C00Z | 119.4 (11) | C018—C017—O00B | 114.5 (12) |
| C00O—C00N—C00L | 120.0 (13) | C00P—C017—O00B | 121.6 (11) |
| C00O—C00N—H00B | 120.0      | C017—C018—C00O | 118.6 (13) |

|                |            |                |            |
|----------------|------------|----------------|------------|
| C00L—C00N—H00B | 120.0      | C017—C018—H01G | 120.7      |
| C00N—C00O—C018 | 120.3 (13) | C00O—C018—H01G | 120.7      |
| C00N—C00O—H00C | 119.9      | C01D—C019—C01F | 121.7 (17) |
| C018—C00O—H00C | 119.9      | C01D—C019—H01H | 119.2      |
| C017—C00P—C00L | 116.1 (11) | C01F—C019—H01H | 119.2      |
| C017—C00P—C00Q | 123.1 (11) | C01J—C01A—C00I | 119.5 (15) |
| C00L—C00P—C00Q | 120.7 (12) | C01J—C01A—H01I | 120.3      |
| C00P—C00Q—C00K | 111.1 (11) | C00I—C01A—H01I | 120.3      |
| C00P—C00Q—C00Z | 115.4 (10) | C016—C01B—C010 | 117.8 (13) |
| C00K—C00Q—C00Z | 90.6 (10)  | C016—C01B—H01J | 121.1      |
| C00P—C00Q—H00D | 112.6      | C010—C01B—H01J | 121.1      |
| C00K—C00Q—H00D | 112.6      | O009—C01C—C00V | 104.5 (11) |
| C00Z—C00Q—H00D | 112.6      | O009—C01C—H01K | 110.9      |
| O00D—C00R—O00B | 116.7 (12) | C00V—C01C—H01K | 110.9      |
| O00D—C00R—C00K | 123.7 (12) | O009—C01C—H01L | 110.9      |
| O00B—C00R—C00K | 119.5 (11) | C00V—C01C—H01L | 110.9      |
| C01G—C00S—C1   | 121.8 (15) | H01K—C01C—H01L | 108.9      |
| C01G—C00S—H00E | 119.1      | C01H—C01D—C019 | 118.6 (15) |
| C1—C00S—H00E   | 119.1      | C01H—C01D—H01M | 120.7      |
| N00E—C00T—C012 | 98.7 (10)  | C019—C01D—H01M | 120.7      |
| N00E—C00T—C015 | 112.5 (11) | C00V—C01E—C014 | 112.4 (12) |
| C012—C00T—C015 | 114.8 (11) | C00V—C01E—H01N | 109.1      |
| N00E—C00T—H00F | 110.1      | C014—C01E—H01N | 109.1      |
| C012—C00T—H00F | 110.1      | C00V—C01E—H01O | 109.1      |
| C015—C00T—H00F | 110.1      | C014—C01E—H01O | 109.1      |
| C016—C00U—C00W | 120.1 (13) | H01N—C01E—H01O | 107.8      |
| C016—C00U—H00G | 120.0      | C014—C01F—C019 | 120.5 (15) |
| C00W—C00U—H00G | 120.0      | C014—C01F—H01P | 119.7      |
| N00H—C00V—C01E | 111.9 (11) | C019—C01F—H01P | 119.7      |
| N00H—C00V—C01C | 99.3 (10)  | C00S—C01G—C01J | 118.1 (15) |
| C01E—C00V—C01C | 114.0 (12) | C00S—C01G—H01Q | 120.9      |
| N00H—C00V—H00H | 110.4      | C01J—C01G—H01Q | 120.9      |
| C01E—C00V—H00H | 110.4      | C01D—C01H—C01K | 119.8 (17) |
| C01C—C00V—H00H | 110.4      | C01D—C01H—H01R | 120.1      |
| C00Y—C00W—C00U | 120.3 (12) | C01K—C01H—H01R | 120.1      |
| C00Y—C00W—H00I | 119.9      | Cl03—C01I—Cl02 | 110.9 (9)  |
| C00U—C00W—H00I | 119.9      | Cl03—C01I—Cl01 | 111.7 (8)  |
| O00C—C00X—N00H | 119.1 (12) | Cl02—C01I—Cl01 | 108.4 (10) |
| O00C—C00X—C00K | 123.9 (11) | Cl03—C01I—H01S | 108.6      |
| N00H—C00X—C00K | 117.1 (11) | Cl02—C01I—H01S | 108.6      |
| C00W—C00Y—C010 | 117.6 (11) | Cl01—C01I—H01S | 108.6      |
| C00W—C00Y—C013 | 122.7 (11) | C01A—C01J—C01G | 122.0 (16) |
| C010—C00Y—C013 | 119.7 (12) | C01A—C01J—H01T | 119.0      |
| C00M—C00Z—C00J | 109.1 (11) | C01G—C01J—H01T | 119.0      |
| C00M—C00Z—C013 | 115.3 (11) | C01H—C01K—C014 | 122.2 (18) |
| C00J—C00Z—C013 | 117.7 (11) | C01H—C01K—H01U | 118.9      |
| C00M—C00Z—C00Q | 111.5 (10) | C014—C01K—H01U | 118.9      |

Document origin: *publCIF* [Westrip, S. P. (2010). *J. Apply. Cryst.*, **43**, 920-925].

*syn*-HT 2CF

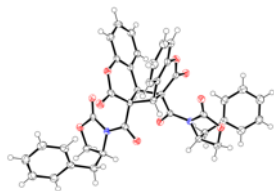

*Crystal data*

|                                |                                                          |
|--------------------------------|----------------------------------------------------------|
| $C_{40}H_{30}N_2O_{10}$        | $D_x = 1.457 \text{ Mg m}^{-3}$                          |
| $M_r = 698.67$                 | Mo K $\alpha$ radiation, $\lambda = 0.71073 \text{ \AA}$ |
| Orthorhombic, $P2_12_12_1$     | Cell parameters from 2436 reflections                    |
| $a = 8.2036 (10) \text{ \AA}$  | $q = 2.2\text{--}19.4^\circ$                             |
| $b = 18.123 (2) \text{ \AA}$   | $m = 0.11 \text{ mm}^{-1}$                               |
| $c = 21.423 (3) \text{ \AA}$   | $T = 296 \text{ K}$                                      |
| $V = 3185.0 (7) \text{ \AA}^3$ | , clear colourless                                       |
| $Z = 4$                        | $0.40 \times 0.20 \times 0.20 \text{ mm}$                |
| $F(000) = 1456$                |                                                          |

*Data collection*

|                                                                      |                                                              |
|----------------------------------------------------------------------|--------------------------------------------------------------|
| Bruker D8 goniometer diffractometer                                  | 2755 independent reflections                                 |
| Radiation source: sealed tube                                        | 2538 reflections with $I > 2s(I)$                            |
| Graphite monochromator                                               | $R_{\text{int}} = 0.036$                                     |
| Detector resolution: $8.3333 \text{ pixels mm}^{-1}$                 | $q_{\text{max}} = 19.5^\circ$ , $q_{\text{min}} = 1.5^\circ$ |
| $w$ scans                                                            | $h = -7\text{--}7$                                           |
| Absorption correction: multi-scan <i>SADABS</i> V2008/1 (Bruker AXS) | $k = -16\text{--}16$                                         |
| $T_{\text{min}} = 0.89$ , $T_{\text{max}} = 0.98$                    | $l = -20\text{--}16$                                         |
| 8883 measured reflections                                            |                                                              |

*Refinement*

|                                                                |                                                                            |
|----------------------------------------------------------------|----------------------------------------------------------------------------|
| Refinement on $F^2$                                            | Secondary atom site location: difference Fourier map                       |
| Least-squares matrix: full                                     | Hydrogen site location: inferred from neighbouring sites                   |
| $R[F^2 > 2s(F^2)] = 0.055$                                     | H atoms treated by a mixture of independent and constrained refinement     |
| $wR(F^2) = 0.147$                                              | $w = 1/[s^2(F_o^2) + (0.074P)^2 + 9.3449P]$ where $P = (F_o^2 + 2F_c^2)/3$ |
| $S = 1.07$                                                     | $(D/s)_{\text{max}} = 0.050$                                               |
| 2755 reflections                                               | $D\rho_{\text{max}} = 0.40 \text{ e \AA}^{-3}$                             |
| 469 parameters                                                 | $D\rho_{\text{min}} = -0.22 \text{ e \AA}^{-3}$                            |
| 0 restraints                                                   | Absolute structure: Flack H D (1983), Acta Cryst. A39, 876-881             |
| Primary atom site location: structure-invariant direct methods | Absolute structure parameter: 0 (2)                                        |

*Special details*

*Geometry.* All esds (except the esd in the dihedral angle between two l.s. planes) are estimated using the full covariance matrix. The cell esds are taken into account individually in the estimation of esds in distances, angles and torsion angles; correlations between esds in cell parameters are only used when they are defined by crystal symmetry. An approximate (isotropic) treatment of cell esds is used for estimating esds involving l.s. planes.

*Refinement.* Refinement of  $F^2$  against ALL reflections. The weighted R-factor  $wR$  and goodness of fit  $S$  are based on  $F^2$ ; conventional R-factors  $R$  are based on  $F$ , with  $F$  set to zero for negative  $F^2$ . The threshold expression of  $F^2 > 2\sigma(F^2)$  is used only for calculating R-factors(gt) etc. and is not relevant to the choice of reflections for refinement. R-factors based on  $F^2$  are statistically about twice as large as those based on  $F$ , and R-factors based on ALL data will be even larger.

*Fractional atomic coordinates and isotropic or equivalent isotropic displacement parameters ( $\text{\AA}^2$ ) for (I)*

|     | <i>x</i>     | <i>y</i>   | <i>z</i>    | $U_{iso}^*/U_{eq}$ |
|-----|--------------|------------|-------------|--------------------|
| O2  | 0.2890 (6)   | 0.4432 (3) | 0.2289 (2)  | 0.0250 (13)        |
| N4  | 0.2939 (7)   | 0.5231 (3) | 0.3088 (3)  | 0.0190 (15)        |
| C3  | 0.2707 (9)   | 0.5066 (5) | 0.2470 (3)  | 0.0208 (19)        |
| C4  | 0.2695 (9)   | 0.5901 (5) | 0.3386 (4)  | 0.025 (2)          |
| O1  | 0.2888 (6)   | 0.5826 (3) | 0.3994 (2)  | 0.0246 (13)        |
| O3  | 0.2344 (6)   | 0.6483 (3) | 0.3133 (2)  | 0.0266 (13)        |
| C5  | 0.3075 (10)  | 0.5041 (4) | 0.4161 (3)  | 0.025 (2)          |
| C6  | 0.3404 (10)  | 0.4656 (4) | 0.3537 (3)  | 0.027 (2)          |
| C12 | 0.8425 (9)   | 0.5244 (5) | 0.4503 (4)  | 0.033 (2)          |
| C7  | 0.5194 (9)   | 0.4372 (4) | 0.3452 (4)  | 0.026 (2)          |
| C13 | 0.7241 (11)  | 0.4756 (5) | 0.4263 (4)  | 0.035 (2)          |
| C9  | 0.6918 (10)  | 0.5543 (4) | 0.3364 (4)  | 0.031 (2)          |
| C11 | 0.8840 (9)   | 0.5887 (5) | 0.4163 (4)  | 0.034 (2)          |
| C10 | 0.8085 (9)   | 0.6035 (4) | 0.3593 (4)  | 0.030 (2)          |
| C8  | 0.6482 (9)   | 0.4903 (4) | 0.3693 (4)  | 0.026 (2)          |
| O4  | 0.4910 (7)   | 0.6141 (3) | 0.2098 (2)  | 0.0266 (13)        |
| C14 | 0.3493 (11)  | 0.6275 (4) | 0.2014 (3)  | 0.0185 (18)        |
| O5  | 0.3073 (6)   | 0.6967 (3) | 0.1854 (2)  | 0.0235 (13)        |
| C18 | 0.1438 (9)   | 0.7199 (5) | 0.1854 (3)  | 0.022 (2)          |
| C16 | 0.0382 (8)   | 0.5919 (4) | 0.2110 (3)  | 0.0205 (19)        |
| C17 | 0.0168 (10)  | 0.6731 (4) | 0.1985 (3)  | 0.0227 (19)        |
| C15 | 0.2197 (9)   | 0.5694 (4) | 0.2024 (3)  | 0.0228 (19)        |
| C22 | -0.1409 (10) | 0.7038 (4) | 0.2014 (3)  | 0.031 (2)          |
| C20 | -0.0274 (10) | 0.8246 (4) | 0.1764 (3)  | 0.026 (2)          |
| C21 | -0.1634 (10) | 0.7798 (4) | 0.1905 (3)  | 0.030 (2)          |
| C19 | 0.1230 (11)  | 0.7950 (4) | 0.1731 (3)  | 0.026 (2)          |
| O6  | -0.1004 (6)  | 0.4578 (3) | 0.2365 (3)  | 0.0258 (13)        |
| O7  | -0.2736 (7)  | 0.5564 (3) | 0.1132 (2)  | 0.0290 (13)        |
| O8  | -0.0762 (6)  | 0.6156 (3) | 0.0646 (2)  | 0.0230 (13)        |
| C30 | -0.0088 (9)  | 0.5394 (4) | 0.1553 (3)  | 0.0181 (19)        |
| C25 | 0.1201 (10)  | 0.6709 (4) | -0.0001 (3) | 0.028 (2)          |
| C28 | 0.0864 (9)   | 0.6233 (4) | 0.0501 (3)  | 0.022 (2)          |
| C26 | 0.3709 (10)  | 0.5976 (4) | 0.0609 (3)  | 0.026 (2)          |
| C31 | 0.1756 (8)   | 0.5350 (4) | 0.1361 (3)  | 0.0198 (19)        |
| C27 | 0.2095 (9)   | 0.5861 (4) | 0.0822 (3)  | 0.0197 (19)        |
| C23 | 0.4051 (11)  | 0.6442 (4) | 0.0112 (4)  | 0.028 (2)          |
| C29 | -0.1287 (11) | 0.5682 (4) | 0.1095 (3)  | 0.0202 (19)        |
| C24 | 0.2801 (10)  | 0.6819 (4) | -0.0196 (3) | 0.027 (2)          |
| C32 | -0.0704 (9)  | 0.4655 (4) | 0.1817 (4)  | 0.022 (2)          |
| N5  | -0.0924 (7)  | 0.4071 (3) | 0.1412 (3)  | 0.0192 (15)        |
| O9  | -0.0206 (6)  | 0.4584 (3) | 0.0453 (2)  | 0.0253 (13)        |
| O10 | -0.0807 (6)  | 0.3383 (3) | 0.0556 (2)  | 0.0245 (13)        |
| C37 | -0.4933 (9)  | 0.3964 (4) | 0.1017 (3)  | 0.0232 (19)        |
| C33 | -0.0595 (9)  | 0.4057 (5) | 0.0768 (4)  | 0.024 (2)          |
| C36 | -0.3239 (9)  | 0.3309 (4) | 0.1842 (3)  | 0.0230 (19)        |
| C35 | -0.0975 (11) | 0.2848 (4) | 0.1069 (3)  | 0.031 (2)          |
| C41 | -0.5195 (10) | 0.2639 (5) | 0.1125 (4)  | 0.031 (2)          |
| C39 | -0.6843 (10) | 0.3275 (5) | 0.0367 (4)  | 0.033 (2)          |

|     |              |            |            |           |
|-----|--------------|------------|------------|-----------|
| C38 | -0.6136 (10) | 0.3949 (5) | 0.0543 (4) | 0.031 (2) |
| C34 | -0.1416 (9)  | 0.3335 (4) | 0.1645 (3) | 0.026 (2) |
| C40 | -0.6373 (10) | 0.2628 (5) | 0.0649 (4) | 0.037 (2) |
| C42 | -0.4493 (8)  | 0.3294 (4) | 0.1308 (3) | 0.024 (2) |

*Atomic displacement parameters ( $\text{\AA}^2$ ) for (I)*

|     | $U^{11}$  | $U^{22}$  | $U^{33}$  | $U^{12}$   | $U^{13}$   | $U^{23}$   |
|-----|-----------|-----------|-----------|------------|------------|------------|
| O2  | 0.031 (3) | 0.024 (3) | 0.020 (3) | -0.001 (3) | -0.005 (2) | -0.005 (3) |
| N4  | 0.025 (4) | 0.013 (4) | 0.019 (4) | -0.001 (3) | 0.001 (3)  | -0.009 (3) |
| C3  | 0.014 (4) | 0.030 (6) | 0.018 (5) | -0.002 (4) | 0.002 (4)  | -0.001 (4) |
| C4  | 0.013 (5) | 0.033 (6) | 0.028 (6) | -0.006 (4) | 0.000 (4)  | 0.003 (5)  |
| O1  | 0.030 (3) | 0.030 (3) | 0.014 (3) | -0.002 (3) | -0.002 (3) | -0.002 (2) |
| O3  | 0.033 (3) | 0.018 (3) | 0.029 (3) | -0.004 (3) | 0.000 (3)  | -0.001 (3) |
| C5  | 0.043 (5) | 0.012 (4) | 0.019 (5) | 0.003 (4)  | 0.005 (4)  | 0.006 (3)  |
| C6  | 0.042 (6) | 0.026 (5) | 0.014 (4) | 0.000 (4)  | -0.001 (4) | 0.002 (4)  |
| C12 | 0.014 (5) | 0.046 (6) | 0.039 (5) | -0.005 (5) | 0.001 (4)  | 0.005 (5)  |
| C7  | 0.013 (4) | 0.032 (5) | 0.033 (5) | 0.000 (4)  | -0.006 (4) | -0.003 (4) |
| C13 | 0.035 (6) | 0.043 (5) | 0.027 (5) | 0.016 (5)  | 0.007 (5)  | 0.004 (4)  |
| C9  | 0.021 (5) | 0.038 (5) | 0.034 (5) | 0.014 (5)  | 0.005 (4)  | 0.000 (5)  |
| C11 | 0.016 (5) | 0.055 (6) | 0.030 (5) | 0.011 (5)  | -0.005 (4) | 0.002 (5)  |
| C10 | 0.018 (5) | 0.036 (5) | 0.038 (5) | 0.004 (4)  | 0.007 (5)  | -0.007 (4) |
| C8  | 0.024 (5) | 0.033 (5) | 0.021 (5) | 0.010 (4)  | -0.004 (4) | 0.003 (4)  |
| O4  | 0.022 (4) | 0.034 (3) | 0.024 (3) | -0.007 (3) | -0.002 (3) | 0.002 (3)  |
| C14 | 0.016 (6) | 0.029 (6) | 0.010 (4) | -0.004 (4) | -0.002 (4) | 0.001 (4)  |
| O5  | 0.026 (4) | 0.017 (3) | 0.027 (3) | -0.006 (3) | -0.001 (3) | 0.003 (2)  |
| C18 | 0.003 (5) | 0.045 (6) | 0.017 (4) | 0.003 (5)  | 0.002 (3)  | -0.002 (4) |
| C16 | 0.013 (5) | 0.019 (5) | 0.029 (5) | 0.007 (3)  | -0.006 (4) | -0.003 (4) |
| C17 | 0.020 (5) | 0.027 (5) | 0.021 (4) | 0.009 (5)  | -0.003 (4) | -0.001 (4) |
| C15 | 0.025 (5) | 0.026 (5) | 0.017 (4) | 0.000 (4)  | -0.001 (4) | 0.000 (4)  |
| C22 | 0.037 (6) | 0.033 (6) | 0.024 (5) | -0.002 (4) | 0.000 (4)  | -0.013 (4) |
| C20 | 0.026 (5) | 0.025 (5) | 0.026 (5) | 0.005 (5)  | -0.012 (4) | -0.001 (4) |
| C21 | 0.038 (6) | 0.023 (5) | 0.030 (5) | -0.002 (5) | -0.006 (4) | 0.004 (4)  |
| C19 | 0.043 (6) | 0.012 (5) | 0.022 (4) | -0.001 (4) | -0.017 (4) | 0.000 (4)  |
| O6  | 0.028 (3) | 0.026 (3) | 0.023 (4) | -0.002 (3) | 0.004 (3)  | -0.003 (3) |
| O7  | 0.024 (4) | 0.029 (3) | 0.035 (3) | -0.005 (3) | -0.003 (3) | -0.001 (2) |
| O8  | 0.017 (4) | 0.025 (3) | 0.026 (3) | -0.005 (3) | -0.005 (3) | 0.004 (3)  |
| C30 | 0.016 (5) | 0.022 (5) | 0.017 (4) | 0.000 (4)  | -0.004 (4) | 0.001 (4)  |
| C25 | 0.051 (7) | 0.020 (5) | 0.013 (4) | -0.008 (5) | -0.004 (4) | 0.003 (4)  |
| C28 | 0.018 (6) | 0.027 (5) | 0.021 (5) | -0.002 (4) | -0.007 (4) | -0.008 (4) |
| C26 | 0.040 (6) | 0.022 (5) | 0.017 (5) | -0.012 (4) | 0.003 (4)  | -0.004 (4) |
| C31 | 0.012 (5) | 0.038 (5) | 0.010 (4) | -0.001 (4) | 0.000 (3)  | 0.005 (4)  |
| C27 | 0.017 (5) | 0.023 (4) | 0.018 (4) | -0.006 (4) | 0.007 (4)  | 0.000 (4)  |
| C23 | 0.034 (5) | 0.021 (5) | 0.030 (5) | -0.002 (5) | -0.003 (5) | -0.010 (4) |
| C29 | 0.026 (6) | 0.015 (5) | 0.020 (5) | -0.005 (4) | -0.004 (5) | -0.003 (4) |
| C24 | 0.019 (5) | 0.029 (5) | 0.033 (5) | 0.001 (5)  | 0.002 (4)  | -0.010 (4) |
| C32 | 0.015 (5) | 0.029 (5) | 0.022 (6) | 0.001 (4)  | 0.000 (4)  | -0.003 (5) |
| N5  | 0.020 (4) | 0.028 (4) | 0.010 (4) | 0.003 (3)  | 0.006 (3)  | -0.006 (3) |
| O9  | 0.033 (3) | 0.025 (3) | 0.018 (3) | -0.005 (3) | -0.003 (3) | 0.003 (3)  |
| O10 | 0.031 (3) | 0.018 (3) | 0.025 (3) | -0.003 (3) | -0.003 (3) | -0.003 (3) |
| C37 | 0.018 (4) | 0.025 (5) | 0.027 (5) | 0.003 (4)  | 0.002 (4)  | 0.003 (4)  |
| C33 | 0.016 (5) | 0.032 (7) | 0.022 (6) | 0.004 (4)  | -0.006 (4) | -0.005 (5) |
| C36 | 0.016 (5) | 0.026 (4) | 0.028 (4) | -0.001 (4) | -0.004 (4) | 0.003 (4)  |
| C35 | 0.044 (5) | 0.028 (5) | 0.020 (5) | -0.005 (4) | 0.014 (4)  | 0.002 (4)  |
| C41 | 0.017 (5) | 0.038 (6) | 0.038 (5) | -0.008 (4) | 0.007 (5)  | -0.011 (4) |
| C39 | 0.030 (5) | 0.042 (6) | 0.029 (5) | 0.004 (5)  | 0.005 (4)  | 0.004 (5)  |
| C38 | 0.019 (5) | 0.045 (6) | 0.028 (5) | -0.003 (4) | 0.014 (5)  | 0.002 (4)  |

|     |           |           |           |            |           |            |
|-----|-----------|-----------|-----------|------------|-----------|------------|
| C34 | 0.040 (6) | 0.005 (4) | 0.032 (5) | -0.006 (4) | 0.013 (4) | -0.003 (4) |
| C40 | 0.033 (5) | 0.049 (6) | 0.029 (5) | -0.009 (5) | 0.003 (5) | -0.004 (5) |
| C42 | 0.016 (5) | 0.029 (5) | 0.027 (5) | -0.002 (4) | 0.007 (4) | -0.003 (4) |

*Geometric parameters (Å, °) for (I)*

|             |            |             |            |
|-------------|------------|-------------|------------|
| O2—C3       | 1.222 (8)  | C20—C21     | 1.412 (11) |
| N4—C3       | 1.370 (9)  | O6—C32      | 1.207 (8)  |
| N4—C4       | 1.387 (10) | O7—C29      | 1.211 (9)  |
| N4—C6       | 1.470 (9)  | O8—C29      | 1.360 (9)  |
| C3—C15      | 1.544 (11) | O8—C28      | 1.377 (9)  |
| C4—O3       | 1.219 (9)  | C30—C29     | 1.484 (10) |
| C4—O1       | 1.319 (9)  | C30—C32     | 1.539 (10) |
| O1—C5       | 1.476 (8)  | C30—C31     | 1.570 (11) |
| C5—C6       | 1.531 (10) | C25—C24     | 1.392 (11) |
| C6—C7       | 1.567 (11) | C25—C28     | 1.405 (10) |
| C12—C13     | 1.411 (11) | C28—C27     | 1.396 (10) |
| C12—C11     | 1.417 (11) | C26—C23     | 1.387 (10) |
| C7—C8       | 1.520 (11) | C26—C27     | 1.415 (10) |
| C13—C8      | 1.396 (11) | C31—C27     | 1.506 (10) |
| C9—C8       | 1.404 (10) | C23—C24     | 1.398 (11) |
| C9—C10      | 1.397 (11) | C32—N5      | 1.380 (9)  |
| C11—C10     | 1.394 (11) | N5—C33      | 1.404 (10) |
| O4—C14      | 1.201 (8)  | N5—C34      | 1.480 (9)  |
| C14—O5      | 1.347 (8)  | O9—C33      | 1.213 (9)  |
| C14—C15     | 1.496 (10) | O10—C33     | 1.315 (9)  |
| O5—C18      | 1.405 (9)  | O10—C35     | 1.472 (9)  |
| C18—C17     | 1.372 (10) | C37—C38     | 1.415 (11) |
| C18—C19     | 1.397 (10) | C37—C42     | 1.413 (10) |
| C16—C17     | 1.506 (10) | C36—C42     | 1.537 (10) |
| C16—C15     | 1.555 (10) | C36—C34     | 1.555 (10) |
| C16—C30     | 1.574 (10) | C35—C34     | 1.560 (11) |
| C17—C22     | 1.410 (11) | C41—C42     | 1.376 (11) |
| C15—C31     | 1.592 (10) | C41—C40     | 1.404 (11) |
| C22—C21     | 1.408 (11) | C39—C40     | 1.374 (11) |
| C20—C19     | 1.348 (11) | C39—C38     | 1.403 (11) |
|             |            |             |            |
| C3—N4—C4    | 128.1 (6)  | C29—O8—C28  | 122.0 (6)  |
| C3—N4—C6    | 120.9 (6)  | C29—C30—C32 | 109.3 (6)  |
| C4—N4—C6    | 110.8 (6)  | C29—C30—C31 | 118.9 (6)  |
| O2—C3—N4    | 119.6 (7)  | C32—C30—C31 | 111.6 (6)  |
| O2—C3—C15   | 122.0 (7)  | C29—C30—C16 | 116.8 (6)  |
| N4—C3—C15   | 118.3 (7)  | C32—C30—C16 | 109.2 (6)  |
| O3—C4—O1    | 123.9 (7)  | C31—C30—C16 | 89.6 (5)   |
| O3—C4—N4    | 125.8 (7)  | C24—C25—C28 | 120.2 (7)  |
| O1—C4—N4    | 110.4 (7)  | O8—C28—C27  | 122.7 (7)  |
| C4—O1—C5    | 110.6 (6)  | O8—C28—C25  | 115.2 (7)  |
| O1—C5—C6    | 104.2 (5)  | C27—C28—C25 | 122.1 (7)  |
| N4—C6—C5    | 101.8 (5)  | C23—C26—C27 | 121.7 (7)  |
| N4—C6—C7    | 113.6 (6)  | C27—C31—C30 | 110.3 (6)  |
| C5—C6—C7    | 114.6 (6)  | C27—C31—C15 | 113.6 (6)  |
| C13—C12—C11 | 119.6 (7)  | C30—C31—C15 | 88.1 (5)   |
| C8—C7—C6    | 113.8 (6)  | C28—C27—C26 | 116.5 (6)  |



|             |           |             |           |
|-------------|-----------|-------------|-----------|
| C8—C13—C12  | 120.4 (7) | C28—C27—C31 | 122.8 (6) |
| C8—C9—C10   | 121.6 (7) | C26—C27—C31 | 120.7 (6) |
| C10—C11—C12 | 120.1 (8) | C26—C23—C24 | 120.8 (7) |
| C11—C10—C9  | 119.4 (7) | O7—C29—O8   | 118.0 (7) |
| C9—C8—C13   | 119.0 (7) | O7—C29—C30  | 123.0 (7) |
| C9—C8—C7    | 122.0 (7) | O8—C29—C30  | 118.7 (7) |
| C13—C8—C7   | 119.0 (7) | C25—C24—C23 | 118.7 (7) |
| O4—C14—O5   | 118.3 (7) | O6—C32—N5   | 119.8 (7) |
| O4—C14—C15  | 122.9 (7) | O6—C32—C30  | 121.6 (7) |
| O5—C14—C15  | 118.5 (7) | N5—C32—C30  | 118.6 (7) |
| C14—O5—C18  | 121.5 (6) | C32—N5—C33  | 127.3 (7) |
| C17—C18—C19 | 123.2 (7) | C32—N5—C34  | 120.9 (6) |
| C17—C18—O5  | 122.7 (7) | C33—N5—C34  | 111.6 (6) |
| C19—C18—O5  | 114.0 (7) | C33—O10—C35 | 111.5 (6) |
| C17—C16—C15 | 110.3 (6) | C38—C37—C42 | 118.6 (7) |
| C17—C16—C30 | 115.3 (6) | O9—C33—O10  | 125.1 (7) |
| C15—C16—C30 | 89.2 (5)  | O9—C33—N5   | 125.6 (7) |
| C18—C17—C22 | 117.5 (7) | O10—C33—N5  | 109.3 (7) |
| C18—C17—C16 | 123.5 (7) | C42—C36—C34 | 116.3 (6) |
| C22—C17—C16 | 119.0 (7) | O10—C35—C34 | 103.9 (6) |
| C14—C15—C3  | 109.6 (6) | C42—C41—C40 | 120.5 (8) |
| C14—C15—C16 | 119.8 (6) | C40—C39—C38 | 120.6 (7) |
| C3—C15—C16  | 112.3 (6) | C39—C38—C37 | 119.8 (7) |
| C14—C15—C31 | 115.1 (6) | N5—C34—C36  | 112.4 (6) |
| C3—C15—C31  | 109.0 (6) | N5—C34—C35  | 100.3 (6) |
| C16—C15—C31 | 89.4 (5)  | C36—C34—C35 | 114.8 (6) |
| C21—C22—C17 | 119.9 (7) | C39—C40—C41 | 120.0 (8) |
| C19—C20—C21 | 120.3 (7) | C41—C42—C37 | 120.5 (7) |
| C22—C21—C20 | 119.6 (7) | C41—C42—C36 | 120.5 (7) |
| C20—C19—C18 | 119.4 (7) | C37—C42—C36 | 119.0 (7) |

Document origin: *publCIF* [Westrip, S. P. (2010). *J. Apply. Cryst.*, **43**, 920-925].

## References

1. T. Hintermann, D. Seebach, *Helv. Chim. Acta* **1998**, *81*, 2093.
2. H.-J. Yoon, M. Dakanali, D. Lichlyter, W. M. Chang, K. A. Nguyen, M. E. Nipper, M. A. Haidekker, and E. A. Theodorakis, *Org. Biomol. Chem.*, **2011**, *9*, 3530.
3. K. Itoh, R. Kato, D. Kinugawa, H. Kamiya, R. Kudo, M. Hasegawa, H. Fujii, and H. Suga, *Org. Biomol. Chem.*, **2015**, *13*, 8919.
